# Supplementary material for: Sex-specific characteristics of special endurance and performance potential in female runners
Source: BMC Res Notes. 2025 Apr 26;18:196. doi: 10.1186/s13104-025-07256-6 (PMC12032771; doi:10.1186/s13104-025-07256-6)
Supplement: Supplementary file 1 — Supplementary Material 1 [file 13104_2025_7256_MOESM1_ESM.xlsx]

## Sheet: Tabelle1
name	first name	age	sec 100m	placement 100m	sec 200m	placement 200m	KsA value	year
Richter	Annegret	30	11.49	1	23.42	3	0.981213	1980
Gaugel	Heidi Elke	23	11.53	2	23.65	5	0.975053	1980
Hirsch	Monika	21	11.6	3	24.05	22	0.964657	1980
Sommer	Ulrike	21	11.6	4	23.2	1	1	1980
Poßekel	Elvira	27	11.4	6	23.86	11	0.955574	1980
Sussiek	Christina	20	11.65	7	23.32	2	0.999142	1980
Betz	Bianca	20	11.73	10	23.99	19	0.977907	1980
Göhmann	Iris	18	11.74	11	23.9	12	0.982427	1980
Everts	Sabine	19	11.5	13	24.02	20	0.957535	1980
Schniggendiller	Cornelia	24	11.5	14	23.6	10	0.974576	1980
Wosnitza	Dorothee	24	11.5	15	23.4	7	0.982906	1980
Wollmer	Elke	19	11.76	16	23.97	17	0.981227	1980
Könninger	Anke	19	11.76	17	24.1	30	0.975934	1980
Meurer	Rita	24	11.83	18	23.7	13	0.998312	1980
Watschke	Corinna	19	11.83	19	24.1	27	0.981743	1980
Schmidt	Heike	22	11.6	22	23.5	9	0.987234	1980
Griese	Annegret	17	11.6	24	23.96	16	0.96828	1980
Sommer	Ulrike	22	11.3	1	23	2	0.982609	1981
Hirsch	Monika	22	11.41	2	23.01	3	0.991743	1981
Gaugel	Heidi	24	11.54	3	23.02	4	1.00261	1981
Göhmann	Iris	19	11.61	4	23.7	13	0.979747	1981
Poßekel	Elvira	28	11.61	5	24.23	30	0.958316	1981
Sussiek	Christina	21	11.4	6	23.55	10	0.968153	1981
Betz	Bianca	21	11.65	7	23.39	7	0.996152	1981
Bußmann	Gaby	22	11.65	8	23.24	5	1.00258	1981
Klösters	Sabine	21	11.7	10	23.91	19	0.97867	1981
Daimer	Rita	19	11.72	11	23.87	18	0.981986	1981
Steger	Claudia	22	11.72	12	22.95	1	1.02135	1981
Schniggendiller	Cornelia	25	11.5	13	23.43	8	0.981647	1981
Knurr	Irene	23	11.5	14	24.19	27	0.950806	1981
Krug	Corinna	17	11.5	15	23.85	17	0.964361	1981
Schmidt	Heike	23	11.75	16	23.7	14	0.991561	1981
Fischer	Resi	21	11.8	18	24.07	23	0.980474	1981
Finger	Ute	23	11.82	19	23.39	6	1.01069	1981
Griese	Anne	18	11.83	20	23.66	12	1	1981
Bersch	Andrea	18	11.83	21	23.74	15	0.99663	1981
Schenten	Dagmar	23	11.6	24	24.14	25	0.96106	1981
Köninger	Anke	20	11.6	25	24.14	24	0.96106	1981
Jestel	Astrid	16	11.6	26	23.9	26	0.970711	1981
Vöcking	Birgit	21	11.88	28	23.62	11	1.00593	1981
Gaugel	Heidi-Elke	23	11.39	1	22.23	2	1.02474	1982
Hirsch	Monika	23	11.5	2	23.38	7	0.983747	1982
Watschke	Corinna	21	11.5	3	23.8	13	0.966387	1982
Sommer	Ulrike	23	11.52	4	23.36	6	0.986301	1982
Beblo	Sabina	23	11.3	5	23.89	14	0.946003	1982
Bersch	Andrea	19	11.58	7	23.27	5	0.995273	1982
Finger	Ute	24	11.61	8	23.16	3	1.00259	1982
Steger	Claudia	23	11.63	9	23.4	8	0.994017	1982
Schabinger	Michaela	21	11.65	10	23.73	11	0.981879	1982
Maerz-Fischer	Resi	22	11.58	6	24.17	23	0.958213	1982
Betz	Bianca	22	11.69	11	24.14	19	0.968517	1982
Klösters	Sabine	22	11.69	12	23.96	15	0.975793	1982
Bußmann	Gaby	23	11.69	13	23.24	4	1.00602	1982
Schmidt	Heike	24	11.71	15	22.97	1	1.01959	1982
Bürkle	Annette	20	11.78	17	24.09	18	0.977999	1982
Sussiek	Christina	22	11.78	18	23.76	12	0.991582	1982
Griese	Annette	19	11.8	20	23.56	10	1.0017	1982
Everts	Sabine	21	11.81	23	23.43	9	1.00811	1982
Daimer	Rita	20	11.84	24	24.06	17	0.984206	1982
Meiß	Susanne	20	11.6	25	23.9	21	0.970711	1982
Krug	Corinna	18	11.89	29	23.8	16	0.99916	1982
Lix	Karin	17	11.91	30	24.18	24	0.985112	1982
Klösters	Sabine	23	11.44	1	23.56	5	0.971138	1983
Vollmer	Elke	22	11.46	2	23.73	9	0.965866	1983
Hirsch	Monika	24	11.51	3	23.59	6	0.975837	1983
Thimm	Ute	25	11.57	4	23.15	2	0.999568	1983
Schabinger	Michaela	22	11.58	5	23.28	4	0.994845	1983
Watschke	Corinna	22	11.62	6	24.3	20	0.956379	1983
Frank	Martina	18	11.62	7	23.74	10	0.978939	1983
Sommer	Ulrike	24	11.63	8	23.9	14	0.973222	1983
Bußmann	Gaby	24	11.4	9	23.15	1	0.984881	1983
Gaugel	Heidi-Elke	24	11.67	10	23.66	7	0.986475	1983
Bormuth	Silke	18	11.71	12	24.15	24	0.969772	1983
Sussiek	Christina	23	11.73	13	23.2	3	1.01121	1983
Schmidt	Heike	25	11.5	14	23.5	11	0.978723	1983
Meiß	Susanne	22	11.5	15	24.08	22	0.95515	1983
Krug	Corinna	19	11.981	17	23.85	13	1.0047	1983
Jestel	Astrid	18	11.84	20	24.2	27	0.978512	1983
Everts	Sabine	22	11.6	21	23.81	12	0.974381	1983
Baltruschat	Vera	19	11.6	22	24.16	25	0.960265	1983
Schenten	Dagmar	25	11.86	23	24.1	30	0.984232	1983
Diel	Antje	26	11.89	24	23.94	16	0.993317	1983
Gaugel	Heidi-Elke	25	11.24	1	22.72	1	0.989437	1984
Thimm	Ute	26	11.52	3	22.95	2	1.00392	1984
Schabinger	Michaela	23	11.58	4	23.37	3	0.991014	1984
Köninger	Anke	23	11.64	6	23.94	15	0.972431	1984
Frank	Martina	19	11.65	7	23.69	8	0.983537	1984
Wage	Christiane	21	11.65	8	24.22	26	0.962015	1984
März	Resi	24	11.67	9	24.11	21	0.968063	1984
Wahl	Christine	17	11.7	11	23.73	9	0.986094	1984
Hirsch	Monika	25	11.77	18	24.06	18	0.978387	1984
Becker	Cosima	18	11.81	20	24.09	19	0.98049	1984
Savari	Ulrike	20	11.82	22	24.28	30	0.973641	1984
Bersch	Andrea	21	11.84	23	23.94	14	0.98914	1984
Braun	Sabine	19	11.9	30	23.88	11	0.99665	1984
Gaugel	Heidi-Elke	26	11.15	1	22.56	1	0.988475	1985
Thimm	Ute	27	11.31	2	23.13	3	0.977951	1985
Hirsch	Monika	26	11.42	3	23.55	6	0.969851	1985
Savari	Ulrike	21	11.46	4	23.48	4	0.97615	1985
Maerz	Resi	25	11.48	5	23.91	15	0.960268	1985
Köninger	Anke	24	11.56	6	23.5	11	0.98383	1985
Albinger	Claudia	22	11.57	7	24.23	30	0.955014	1985
Bersch	Andrea	22	11.58	8	23.09	2	1.00303	1985
Braun	Sabine	20	11.59	9	23.6	7	0.982203	1985
Stöckmann	Jutta	23	11.63	10	23.89	14	0.973629	1985
Elsner	Christine	22	11.65	11	24.18	27	0.963606	1985
Steger	Claudia	25	11.7	14	23.68	9	0.988176	1985
Beblo	Sabina	26	11.74	15	23.9	24	0.982427	1985
Knurr	Irena	27	11.5	16	23.92	16	0.961538	1985
Schmidt	Heidi	19	11.83	20	23.85	13	0.992034	1985
Meyer	Birgit	20	11.85	23	23.98	16	0.988324	1985
Alber	Sabine	20	11.86	24	24.16	26	0.981788	1985
Ortel	Astrid	20	11.9	28	23.82	12	0.99916	1985
Gaugel	Heidi-Elke	27	11.2	1	22.91	2	0.977739	1986
Thimm	Ute	28	11.34	2	22.88	1	0.991259	1986
Hirsch	Monika	27	11.47	3	23.8	11	0.963866	1986
März	Resi	26	11.5	4	23.55	6	0.976645	1986
Köninger	Anke	25	11.52	5	23.55	5	0.978344	1986
Betz	Bianca	26	11.52	6	24.15	30	0.954037	1986
Savari	Ulrike	22	11.53	7	23.93	16	0.963644	1986
Lepping	Claudia	18	11.58	8	23.18	3	0.999137	1986
Cordes	Ina	18	11.4	9	23.59	7	0.966511	1986
Kaul	Petra	19	11.69	12	23.73	10	0.985251	1986
Mühlenbein	Ulrike	24	11.73	13	24.14	28	0.971831	1986
Kinzel	Gisela	25	11.8	17	23.3	4	1.01288	1986
Sommer	Ulrike	27	11.78	14	23.89	15	0.986187	1986
Stöckmann	Jutta	24	11.81	18	24.05	22	0.982121	1986
Bersch	Andrea	25	11.86	24	23.81	12	0.99622	1986
Haggenmüller	Andrea	17	11.9	27	24.05	20	0.989605	1986
Steger	Claudia	27	11.91	28	24.05	21	0.990437	1986
Arendt	Helga	22	11.91	29	23.69	9	1.00549	1986
Janke	Karin	25	11.93	30	23.89	14	0.998744	1986
Savari	Ulrike	23	11.23	1	22.88	2	0.981643	1987
Knoll	Silke	20	11.2	2	23.07	3	0.970958	1987
Thimm	Ute	29	11.48	3	22.87	1	1.00394	1987
Richter	Sabine	21	11.57	5	24.25	28	0.954227	1987
März	Resi	27	11.58	6	23.97	16	0.966208	1987
Thomas	Andrea	24	11.61	7	23.15	4	1.00302	1987
Betz	Bianca	27	11.63	8	24.03	19	0.967957	1987
Cordes	Ina	19	11.4	9	23.66	9	0.963652	1987
Haggenmüller	Andrea	18	11.66	10	23.67	8	0.985213	1987
Janke	Karin	24	11.73	14	23.62	7	0.993226	1987
Kinzel	Gisela	26	11.5	15	23.47	5	0.979974	1987
Leonhard	Heike	21	11.78	18	23.95	15	0.983716	1987
Watschke	Corinna	26	11.81	20	24.21	25	0.97563	1987
Hütz	Stefanie	17	11.83	24	24.08	20	0.982558	1987
Abt	Gudrun	24	11.6	25	23.72	11	0.978078	1987
Arendt	Helga	23	11.6	26	23.93	14	0.969494	1987
Schiller	Margit	22	11.6	30	24.1	22	0.962656	1987
Poltrock	Kerstin	23	11.83	22	24.13	23	0.980522	1987
Thomas	Andrea	25	11.34	2	22.74	1	0.997361	1988
Knoll	Silke	21	11.46	3	23.06	3	0.993929	1988
Richter	Sabine	22	11.49	4	23.68	10	0.970439	1988
Abt	Gudrun	26	11.3	5	23.35	6	0.96788	1988
Arendt	Helga	24	11.3	6	23.13	4	0.977086	1988
Braag	Bettina	23	11.3	7	24.22	22	0.933113	1988
Schabinger	Michaela	27	11.55	8	24	17	0.9625	1988
Thimm	Ute	30	11.6	9	23	2	1.0087	1988
Lippe	Gabi	21	11.63	11	23.97	15	0.97038	1988
Haggenmüller	Angelika	19	11.68	14	23.55	7	0.991932	1988
Cordes	Ina	20	11.68	15	23.31	5	1.00215	1988
Günther	Conni	17	11.7	16	23.97	16	0.97622	1988
Janke	Karin	25	11.72	17	23.59	8	0.993641	1988
Köninger	Anke	27	11.5	19	24	25	0.958333	1988
Brandenburger	Heike	18	11.75	20	24.03	18	0.977944	1988
Schiller	Margit	23	11.76	21	23.87	12	0.985337	1988
Poltrock	Kerstin	24	11.79	23	23.63	9	0.997884	1988
Pribnow	Solveig	18	11.81	15	24.29	26	0.972417	1988
Schmidt	Andrea	20	11.86	30	23.91	13	0.992054	1988
Kinzel	Gisela	27	11.86	30	23.81	11	0.99622	1988
Savari	Ulrike	24	11.25	1	23.17	2	0.971083	1989
Thomas	Andrea	26	11.35	2	23.09	1	0.98311	1989
Knoll	Silke	22	11.53	3	23.34	3	0.988003	1989
Hagen	Andrea	21	11.56	4	23.59	5	0.980076	1989
Richter	Sabine	23	11.4	5	24.01	12	0.949604	1989
Seidel	Katja	16	11.66	6	23.65	7	0.986047	1989
Paschke	Melanie	19	11.69	7	24.39	24	0.95859	1989
Leinemann	Birgit	21	11.72	8	24.26	20	0.9662	1989
Janke	Karin	26	11.74	9	23.39	4	1.00385	1989
Heinz	Ulrike	22	11.5	10	23.5	8	0.978723	1989
Wage	Christiane	26	11.5	11	23.9	16	0.962343	1989
Kisabaka	Linda	20	11.8	13	23.75	9	0.993684	1989
Hütz	Stefanie	19	11.82	14	24.44	28	0.967267	1989
Schiller	Margit	24	11.82	15	24.09	14	0.98132	1989
Bartschat	Karin	19	11.83	17	24.2	30	0.977686	1989
Brandenburger	Heike	19	11.83	18	23.65	6	1.00042	1989
Schmidt	Andrea	21	11.83	19	23.76	10	0.995791	1989
Gebhardt	Claudia	19	11.85	21	24.15	17	0.981366	1989
Poltrock	Kerstin	25	11.86	22	24.26	19	0.977741	1989
Faulhaber	Susanne	23	11.93	25	24.3	22	0.981893	1989
Arendt	Helga	25	11.93	27	23.93	11	0.997075	1989
Rohrmann	Astrid	20	11.7	30	24.1	23	0.970954	1989
Savari	Ulrike	25	11.32	1	23.35	4	0.969593	1990
Thomas	Andrea	27	11.38	2	22.99	2	0.989996	1990
Knoll	Silke	23	11.38	3	22.4	1	1.01607	1990
Seidel	Katja	17	11.55	5	24.22	23	0.953757	1990
Janke	Karin	27	11.61	6	23.11	3	1.00476	1990
Schupfner	Christiane	15	11.66	9	24.14	18	0.966031	1990
Hagen	Andrea	22	11.7	10	23.71	7	0.986925	1990
Zaczkiewicz	Claudia	18	11.73	12	23.92	12	0.980769	1990
Böhme	Anja	19	11.73	14	23.91	10	0.981179	1990
Spindler	Petra	21	11.74	15	24.3	26	0.966255	1990
Schmidt	Andrea	22	11.76	18	23.84	9	0.986577	1990
Rockmeier	Birgit	17	11.77	19	24.03	15	0.979609	1990
Gebhardt	Claudia	20	11.77	20	24.05	16	0.978794	1990
Braag	Bettina	25	11.84	24	23.7	6	0.999156	1990
Pribnow	Solveig	20	11.91	26	23.69	5	1.00549	1990
Hütz	Stefanie	20	11.92	28	24.22	28	0.98431	1990
Krabbe	Katrin	22	10.91	1	21.96	1	0.993625	1991
Drechsler	Heike	27	11.09	2	22.58	3	0.982285	1991
Breuer	Grit	19	11.14	3	22.45	2	0.992428	1991
Richter	Sabine	25	11.39	4	23.71	16	0.960776	1991
Knoll	Silke	24	11.41	5	22.81	4	1.00044	1991
Lichtenhagen	Silke	18	11.44	6	23.79	19	0.961749	1991
Günther	Sabine	28	11.52	10	23.3	11	0.988841	1991
Schönenberger	Jana	20	11.59	11	23.22	6	0.998277	1991
Böhme	Anja	20	11.59	13	23.38	8	0.991446	1991
Derr	Manuela	20	11.6	14	23.3	7	0.995708	1991
Savari	Ulrike	26	11.61	15	23.73	17	0.978508	1991
Gebhardt	Claudia	21	11.64	17	23.52	10	0.989796	1991
Rockmeier	Birgit	18	11.7	19	24.02	25	0.974188	1991
Pribnow	Solveig	21	11.7	22	23.55	12	0.993631	1991
Haggenmüller	Angelika	22	11.83	30	23.94	22	0.988304	1991
Thomas	Andrea	28	11.47	9	22.87	5	1.00306	1991
Knoll	Silke	25	11.17	1	22.29	1	1.00224	1992
Thomas	Andrea	29	11.36	5	22.81	2	0.996054	1992
Günther	Sabine	29	11.42	6	23.04	3	0.991319	1992
Lichtenhagen	Silke	19	11.44	7	23.54	5	0.971963	1992
Haggenmüller	Angelika	23	11.49	8	23.61	8	0.973316	1992
Derr	Manuela	21	11.52	9	23.8	14	0.968067	1992
Rockmeier	Gabi	19	11.56	11	23.59	7	0.980076	1992
Schupfner	Christiane	27	11.58	13	23.97	21	0.966208	1992
Notzon	Diana	23	11.6	14	23.78	13	0.97561	1992
Müller	Sylvia	21	11.61	17	23.95	19	0.96952	1992
Heinz	Ulrike	25	11.64	18	24.24	30	0.960396	1992
Schönenberger	Jana	21	11.7	20	23.74	11	0.985678	1992
Rockmeier	Birgit	19	11.73	23	23.85	16	0.983648	1992
Rohländer	Uta	23	11.74	24	23.82	15	0.985726	1992
Böhme	Karin	28	11.5	25	23.55	6	0.976645	1992
Bartschat	Katrin	22	11.78	26	24.18	29	0.974359	1992
Schmidt	Andrea	24	11.78	27	23.95	20	0.983716	1992
Fahrendorff	Doreen	22	11.78	28	23.72	10	0.993255	1992
Leinemann	Birgit	24	11.78	29	23.86	17	0.987427	1992
Hütz	Stefanie	22	11.78	30	24.03	23	0.980441	1992
Paschke	Melanie	23	11.23	1	23.43	4	0.9586	1993
Drechsler	Heike	29	11.36	2	23.16	2	0.981002	1993
Knoll	Silke	26	11.41	3	22.75	1	1.00308	1993
Lichtenhagen	Silke	20	11.5	4	23.59	9	0.974989	1993
Zipp	Bettina	21	11.51	5	23.91	14	0.962777	1993
Philipp	Andrea	22	11.51	6	23.49	7	0.979991	1993
Rockmeier	Birgit	20	11.54	7	23.45	6	0.984222	1993
Savari	Ulrike	29	11.55	8	23.93	15	0.965316	1993
Rockmeier	Gabi	20	11.58	9	23.51	8	0.985113	1993
Verniest	Carla	20	11.6	10	23.88	13	0.971524	1993
Janke	Karin	30	11.71	13	23.66	12	0.989856	1993
Schönenberger	Carla	22	11.73	15	23.23	3	1.0099	1993
Schmidt	Andrea	25	11.74	16	23.93	16	0.981195	1993
Schupfner	Christiane	28	11.74	17	24.01	19	0.977926	1993
Bartschat	Katrin	23	11.75	18	24.05	23	0.977131	1993
Fahrendorff	Doreen	25	11.77	19	24.11	29	0.976358	1993
Haggenmüller	Angelika	24	11.79	20	23.44	5	1.00597	1993
Bertmaring	Carmen	17	11.83	25	23.61	11	1.00212	1993
Gruhler	Tina	22	11.84	26	24.1	26	0.982573	1993
Pribnow	Solveig	23	11.89	30	24.13	30	0.985495	1993
Paschke	Melanie	24	11.12	1	22.45	1	0.990646	1994
Drechsler	Heike	30	11.38	2	22.84	4	0.996497	1994
Knoll	Silke	27	11.39	3	22.55	2	1.0102	1994
Zipp	Bettina	22	11.39	4	23.21	5	0.981474	1994
Schönmetzler	Tina	23	11.49	5	23.72	12	0.968803	1994
Philipp	Andrea	23	11.5	6	23.48	9	0.979557	1994
Lichtenhagen	Silke	21	11.51	7	22.73	3	1.01276	1994
Rockmeier	Birgit	21	11.65	8	23.27	6	1.00129	1994
Hormann	Christina	22	11.66	9	23.63	10	0.986881	1994
Volk	Claudia	21	11.68	12	23.82	14	0.980688	1994
Rockmeir	Gabi	21	11.69	13	23.81	13	0.98194	1994
Haggenmüller	Andrea	25	11.71	14	23.29	7	1.00558	1994
Schönenberger	Jana	23	11.74	16	23.48	8	1	1994
Schupfner	Christiane	29	11.77	19	24.15	26	0.974741	1994
Janke	Karin	31	11.78	21	23.66	11	0.995773	1994
Kersting	Martina	25	11.79	22	24.15	25	0.976398	1994
Pribnow	Solveig	24	11.84	26	24	18	0.986667	1994
Böhme	Karin	30	11.85	27	24.21	29	0.978934	1994
Wagner	Marion	16	11.86	29	24.22	30	0.979356	1994
Paschke	Melanie	25	11.04	1	22.53	2	0.980027	1995
Becker	Gabriele	20	11.34	2	23.63	9	0.959797	1995
Philipp	Andrea	24	11.34	3	23.45	6	0.967164	1995
Knoll	Silke	28	11.38	4	22.45	1	1.01381	1995
Lichtenhagen	Silke	22	11.41	5	22.92	3	0.995637	1995
Rockmeier	Birgit	22	11.47	6	23.28	5	0.985395	1995
Schönmetzler	Tina	24	11.59	7	23.82	18	0.973132	1995
Zipp	Bettina	23	11.65	8	23.88	21	0.975712	1995
Holzner	Ulrike	27	11.66	9	24.03	26	0.970454	1995
Volk	Claudia	22	11.71	13	23.77	14	0.985276	1995
Kisabaka	Linda	26	11.71	14	23.71	11	0.987769	1995
Rockmeier	Gabi	22	11.74	16	23.47	7	1.00043	1995
Hormann	Christina	23	11.76	20	24.12	30	0.975124	1995
Janke	Karin	32	11.76	19	23.82	19	0.987406	1995
Elmers	Caroline	18	11.76	21	24.11	29	0.975529	1995
Gosh	Shanta	20	11.82	23	23.89	22	0.989535	1995
Schönberger	Jana	24	11.84	25	23.53	8	1.00637	1995
Schmitz	Anja	21	11.84	26	23.95	23	0.988727	1995
Feller	Anke	24	11.85	28	23.77	15	0.997055	1995
Seidel	Katja	22	11.87	29	24.08	27	0.98588	1995
Paschke	Melanie	26	11.06	1	22.55	1	0.980931	1996
Lichtenhagen	Silke	23	11.24	2	23.19	5	0.969383	1996
Rockmeier	Birgit	23	11.39	4	23.12	4	0.985294	1996
Rockmeier	Gabi	23	11.45	5	23.02	2	0.994787	1996
Knoll	Silke	29	11.47	7	23.04	3	0.99566	1996
Schönmetzler	Tina	25	11.54	9	23.91	12	0.965286	1996
Becker	Gabriele	21	11.57	10	24.11	22	0.959768	1996
Bethge	Andrea	27	11.58	11	23.79	10	0.973518	1996
Seidel	Katja	23	11.59	12	24.16	25	0.959437	1996
Feller	Anke	25	11.67	14	23.68	8	0.985642	1996
Gosh	Shanta	21	11.68	15	23.52	7	0.993197	1996
Wagner	Marion	18	11.71	16	24.08	21	0.972591	1996
Straub	Heidi	30	11.73	17	24.13	24	0.972234	1996
Schmidt	Andrea	28	11.75	18	23.85	11	0.985325	1996
Schönenberger	Jana	25	11.77	19	24.18	27	0.973532	1996
Mulrain	Sabrina	18	11.77	20	24.03	17	0.979609	1996
Kette	Nancy	19	11.84	23	24.01	16	0.986256	1996
Bertmaring	Carmen	20	11.87	27	24.28	30	0.977759	1996
Abel	Sandra	19	11.88	28	24.07	20	0.987121	1996
* Azarachvilli	Maria	32	11.64	13	23.3	6	0.999142	1996
Philipp	Andrea	26	11.05	1	22.75	2	0.971429	1997
Paschke	Melanie	27	11.17	2	22.81	4	0.979395	1997
Rockmeier	Gabi	24	11.38	4	23.03	5	0.988276	1997
Rockmeier	Birgit	24	11.42	5	23.11	6	0.988317	1997
Wagner	Marion	19	11.47	6	24.04	23	0.954243	1997
Knoll	Silke	30	11.51	7	23.19	7	0.992669	1997
Lichtenhagen	Silke	24	11.52	8	23.63	12	0.975032	1997
Gosh	Shanta	22	11.52	9	22.8	3	1.01053	1997
Breuer	Grit	25	11.55	10	22.73	1	1.01628	1997
Braun	Sabine	32	11.58	11	24.19	28	0.95742	1997
Eichmann	Silke	21	11.61	14	23.82	16	0.974811	1997
Marahrens	Nicole	20	11.63	15	23.53	10	0.988525	1997
Feller	Anke	26	11.63	16	23.29	8	0.998712	1997
Görigk	Sandra	22	11.67	17	24.21	29	0.964064	1997
Brodbek	Birgit	23	11.68	18	24.12	27	0.968491	1997
Kette	Nancy	20	11.71	20	23.66	13	0.989856	1997
Schönenberger	Jana	26	11.75	22	23.84	17	0.985738	1997
Chrzan	Melanie	19	11.76	24	23.9	19	0.9841	1997
Bertmaring	Carmen	21	11.78	25	24.1	26	0.977593	1997
Ekpo-Umoh	Florence	20	11.79	27	23.89	18	0.987024	1997
Kasten	Sandra	24	11.69	19	23.91	20	0.977834	1997
Paschke	Melanie	28	11.07	1	22.7	1	0.97533	1998
Philipp	Andrea	27	11.17	2	23.12	4	0.966263	1998
Rochmeier	Gabi	25	11.37	3	23.08	3	0.985269	1998
Rockmeier	Birgit	25	11.49	4	23.14	5	0.993086	1998
Möller	Esther	21	11.51	5	23.21	6	0.991814	1998
Leschnik	Ingeborg	26	11.55	6	24.18	29	0.955335	1998
Mulrain	Sabrina	20	11.57	7	22.84	2	1.01313	1998
Schielke	Sina	17	11.59	8	23.93	17	0.968659	1998
Lichtenhagen	Silke	25	11.59	9	23.5	9	0.986383	1998
Görigk	Sandra	23	11.64	10	23.93	18	0.972837	1998
Wagner	Marion	20	11.64	11	23.95	19	0.972025	1998
Gosh	Shanta	23	11.65	12	23.45	7	0.993603	1998
Dietrich	Annegret	18	11.7	13	24.11	25	0.970552	1998
Reuss	Alice	20	11.7	14	24.08	24	0.971761	1998
Kasten	Sandra	25	11.75	16	23.76	12	0.989057	1998
Marahrens	Nicole	21	11.75	18	23.49	8	1.00043	1998
Feller	Anke	27	11.76	20	23.87	14	0.985337	1998
Tschirch	Cathleen	19	11.8	21	23.8	13	0.991597	1998
Sprenger	Juliane	21	11.84	22	24.11	26	0.982165	1998
Kette	Nancy	21	11.86	23	23.69	10	1.00127	1998
Philipp	Andrea	28	11.06	1	22.25	1	0.994157	1999
Rockmeier	Gabi	26	11.36	2	23.09	6	0.983976	1999
Wagner	Marion	21	11.38	3	23.46	12	0.970162	1999
Schielke	Sina	18	11.39	4	23.03	5	0.989145	1999
Rockmeier	Birgit	26	11.44	5	23.14	7	0.988764	1999
Gosh	Shanta	24	11.5	6	23.31	8	0.986701	1999
Möller	Esther	22	11.54	7	22.85	3	1.01007	1999
Mulrain	Sabrina	21	11.56	8	22.73	2	1.01716	1999
Bornscheuer	Andrea	25	11.47	9	23.37	10	0.9816	1999
Paschke	Melanie	29	11.57	10	23.6	14	0.980508	1999
Kasten	Sandra	26	11.61	11	23.66	16	0.981403	1999
Reuss	Alice	21	11.63	12	23.87	21	0.974445	1999
Lichtenhagen	Silke	16	11.64	13	23.68	18	0.983108	1999
Schönenberger	Jana	28	11.77	18	23.67	17	0.994508	1999
Ekpo-Umoh	Florence	22	11.79	20	23.63	15	0.997884	1999
O'Brien	Andrea	19	11.81	21	23.95	24	0.986221	1999
Wallner	Miriam	19	11.81	23	23.92	23	0.987458	1999
Marahrens	Nicole	22	11.83	26	23.32	9	1.01458	1999
Philipp	Andrea	29	11.21	1	22.69	1	0.9881	2000
Möller	Esther	23	11.33	2	22.81	4	0.993424	2000
Gosh	Shanta	25	11.46	5	22.8	3	1.00526	2000
Schielke	Sina	19	11.46	6	23.07	5	0.993498	2000
Mulrain	Sabrina	22	11.54	7	22.75	2	1.01451	2000
Rockmeier	Gabi	27	11.57	8	23.41	7	0.988466	2000
Rockmeier	Birgit	27	11.58	9	23.24	6	0.996558	2000
Kaufmann	Christa	18	11.58	10	23.97	23	0.966208	2000
Reuss	Alice	22	11.59	11	23.45	8	0.988486	2000
Breuer	Grit	28	11.59	13	23.46	9	0.988065	2000
Kasten	Sandra	27	11.68	16	23.7	11	0.985654	2000
Marahrens	Nicole	23	11.69	17	23.74	12	0.984836	2000
Wallner	Marjam	20	11.7	19	23.92	19	0.978261	2000
Schulze	Maren	18	11.77	21	23.92	20	0.984114	2000
Feller	Anke	29	11.81	24	23.77	13	0.99369	2000
Tisner	Karen	22	11.84	27	24.07	26	0.983797	2000
Grötzinger	Kerstin	18	11.85	28	23.83	16	0.994545	2000
Lichtenhagen	Silke	27	11.89	30	23.78	14	1	2000
Rockmeier	Gabi	28	11.17	1	22.68	1	0.985009	2001
Paschke	Melanie	31	11.23	2	23.4	9	0.959829	2001
Schielke	Sina	20	11.24	3	22.78	2	0.986831	2001
Wagner	Marion	23	11.33	4	23.39	8	0.96879	2001
Habel	Katchi	19	11.41	5	23.31	7	0.978979	2001
Rockmeier	Birgit	28	11.44	6	22.9	4	0.999127	2001
Breuer	Grit	29	11.48	7	22.79	3	1.00746	2001
Reuss	Alice	23	11.55	8	24.19	26	0.95494	2001
Möller	Sandra	21	11.64	9	23.65	12	0.984355	2001
Fink	Korinna	20	11.65	10	23.7	13	0.983122	2001
Gosh	Shanta	26	11.67	11	23.3	6	1.00172	2001
Kampf	Stephanie	23	11.68	12	23.79	15	0.981925	2001
Koob	Tatjana	21	11.71	13	24.08	22	0.972591	2001
Feller	Anke	30	11.73	14	23.53	10	0.997025	2001
Tschirch	Cathleen	22	11.75	15	24.11	24	0.974699	2001
Brodbeck	Birgit	27	11.78	16	24.21	27	0.973152	2001
Kasten	Sandra	28	11.79	17	23.88	16	0.987437	2001
Bornscheuer	Andrea	27	11.82	19	24.02	18	0.98418	2001
Schönenberger	Jana	30	11.82	20	24.06	20	0.982544	2001
Schorr	Lisa	19	11.84	22	24.28	28	0.975288	2001
Marahrens	Nicole	24	11.86	24	23.3	5	1.01803	2001
Maurer	Silke	18	11.87	27	24.1	23	0.985062	2001
Kette	Nancy	24	11.88	29	23.77	14	0.999579	2001
Schielke	Sina	21	11.16	1	22.91	1	0.974247	2002
Rockmeier	Gabi	29	11.29	2	22.94	2	0.984307	2002
Paschke	Melanie	31	11.3	3	23.85	9	0.947589	2002
Habel	Katchi	20	11.54	5	23.65	7	0.975899	2002
Rockmeier	Birgit	29	11.59	6	23.16	3	1.00086	2002
Möller	Sandra	22	11.65	8	23.24	5	1.00258	2002
Schorr	Lisa	20	11.72	10	23.88	10	0.981575	2002
Tschirch	Cathleen	23	11.74	11	24.05	14	0.976299	2002
O'Brien	Andrea	22	11.84	17	24.32	23	0.973684	2002
Fink	Korinna	21	11.85	19	24.02	13	0.986678	2002
Kampf	Stephanie	24	11.88	22	24.18	16	0.98263	2002
König	Sandra	29	11.93	26	24.2	18	0.98595	2002
Maurer	Silke	19	11.94	30	24.46	30	0.976288	2002
Marahrens	Nicole	25	11.8	13	23.21	4	1.0168	2002
Möller	Esther	26	11.25	1	23.34	4	0.96401	2003
Wagner	Marion	25	11.31	2	23.49	6	0.962963	2003
Paschke	Melanie	33	11.38	3	23.13	2	0.984003	2003
Rockmeier	Gabi	30	11.42	4	23.01	1	0.992612	2003
Wakan	Katja	22	11.54	6	24.25	26	0.951753	2003
Rockmeier	Birgit	30	11.59	9	23.24	3	0.997418	2003
Feller	Anke	32	11.68	11	23.64	7	0.988156	2003
Habel	Katchi	21	11.73	13	24.21	23	0.969021	2003
Kampf	Stephanie	25	11.76	15	23.67	8	0.993663	2003
Tschirch	Cathleen	24	11.77	17	24.21	21	0.972325	2003
Schorr	Lisa	21	11.81	18	24.26	28	0.973619	2003
Ochs	Rita	21	11.85	19	24.17	20	0.980554	2003
Schielke	Sina	23	11.21	1	23.22	2	0.965547	2004
Rockmeier	Gabi	31	11.35	2	23.53	3	0.964726	2004
Rockmeier	Birgit	31	11.43	3	23.04	1	0.992188	2004
Tschirch	Cathleen	25	11.5	6	23.6	4	0.974576	2004
Bertenbreiter	Franziska	24	11.61	8	24.3	27	0.955556	2004
Habel	Katchi	22	11.62	9	24.35	30	0.954415	2004
Schorr	Lisa	22	11.7	10	24.24	21	0.965347	2004
Börner	Katja	18	11.7	11	23.91	10	0.97867	2004
Fink	Korinna	23	11.72	12	23.81	8	0.98446	2004
Pollmächer	Anja	19	11.78	14	23.95	12	0.983716	2004
Bauer	Sabine	25	11.87	22	24.27	24	0.978162	2004
Schulze	Maren	22	11.87	23	23.91	11	0.99289	2004
Battke	Sara	19	11.89	24	23.73	6	1.00211	2004
Balkow	Nadine	22	11.9	26	24.1	16	0.987552	2004
Feller	Anke	33	11.9	27	24.22	20	0.982659	2004
Dix	Maike	18	11.91	29	23.76	7	1.00253	2004
Plato	Daniela	26	11.74	13	24.02	15	0.977519	2004
Rockmeier	Birgit	32	11.33	1	23.05	1	0.98308	2005
Möller	Esther	28	11.47	3	23.8	6	0.963866	2005
Möllinger	Anne	20	11.56	5	24.23	19	0.954189	2005
Möller	Sandra	25	11.56	6	23.83	7	0.970206	2005
Tschirch	Cathleen	26	11.64	8	24.29	21	0.958419	2005
Börner	Katja	19	11.65	9	24.34	24	0.957272	2005
Gangnus	Jala	19	11.61	6	23.38	2	0.993157	2005
Sutschet	Julia	17	11.65	10	24.08	12	0.967608	2005
Mulrain	Sabrina	27	11.66	11	23.57	4	0.989393	2005
Pollmächer	Anja	20	11.82	17	24.14	15	0.979287	2005
Oehme	Sandra	19	11.83	18	24.33	23	0.972462	2005
Dix	Maike	19	11.84	21	23.89	8	0.99121	2005
Schulze	Maren	23	11.85	22	23.63	5	1.00296	2005
Fleig	Angela	19	11.85	23	24.14	14	0.981773	2005
Heinrich	Sarah	17	11.87	25	24.05	10	0.98711	2005
Marschek	Beatrice	20	11.87	26	24.15	16	0.983023	2005
Hummel	Anke	19	11.89	27	24.17	18	0.983864	2005
Hochhaus	Jessica	17	11.9	28	24.39	28	0.97581	2005
Wakan	Katja	25	11.37	1	23.95	11	0.949478	2006
Tschirch	Cathleen	26	11.42	3	23.38	4	0.976903	2006
Sailer	Verena	21	11.43	4	24.01	13	0.952103	2006
Rockmeier	Birgit	33	11.44	4	22.94	1	0.997384	2006
Möller	Sandra	26	11.63	10	23.41	6	0.993592	2006
Kedzierski	Johanna	22	11.66	11	23.72	7	0.983137	2006
Stolle	Juliane	18	11.66	12	23.39	5	0.997007	2006
Gangnus	Jala	20	11.71	16	23.24	2	1.00775	2006
Börner	Katja	20	11.72	18	23.74	8	0.987363	2006
Rach	Diana	17	11.73	19	24.23	22	0.968221	2006
Möllinger	Anne	21	11.74	20	24.24	24	0.968647	2006
Pollmächer	Anja	21	11.76	22	23.37	3	1.00642	2006
Fleig	Angela	20	11.82	24	24.01	14	0.98459	2006
Peters	Mareike	20	11.82	25	24.07	16	0.982135	2006
Schmitt	Annika	23	11.83	26	24.23	21	0.976475	2006
Schulze	Maren	24	11.83	27	23.76	9	0.995791	2006
Giebel	Nina	20	11.84	28	24.28	26	0.975288	2006
Sutschet	Juliane	18	11.68	14	23.9	10	0.977406	2006
Schielke	Sina	26	11.21	1	23.49	3	0.954449	2007
Möller	Sandra	27	11.43	3	23.54	4	0.971113	2007
Tschirch	Cathleen	28	11.44	4	22.97	1	0.996082	2007
Wakan	Katja	26	11.48	5	23.78	9	0.965517	2007
Peters	Mareike	21	11.59	7	23.69	6	0.978472	2007
Möllinger	Anne	22	11.67	11	24.28	24	0.961285	2007
Börner	Katja	21	11.68	12	24.21	19	0.964891	2007
Kedzierski	Johanna	23	11.7	13	23.47	2	0.997017	2007
Dix	Maike	21	11.7	14	23.76	8	0.984848	2007
Fink	Korinna	26	11.77	17	24.05	13	0.978794	2007
Thumann	Stephanie	26	11.8	19	24.06	14	0.980881	2007
Stolle	Juliane	19	11.81	22	23.69	8	0.997045	2007
Giebel	Nina	21	11.86	19	24.15	16	0.982195	2007
Gangnus	Jala	21	11.87	30	24.04	12	0.987521	2007
Tschirch	Cathleen	29	11.45	2	23.53	2	0.973226	2008
Möllinger	Anne	23	11.48	3	23.89	11	0.961072	2008
Köhler	Karoline	24	11.49	4	23.72	5	0.968803	2008
Wagner	Marion	30	11.52	5	23.66	3	0.973795	2008
Peters	Mareike	22	11.54	6	23.52	1	0.981293	2008
Thumann	Stephanie	27	11.61	10	24.16	22	0.961093	2008
Pollmächer	Anja	23	11.7	15	23.76	7	0.984848	2008
Elbe	Ann-Kathrin	21	11.77	18	23.92	13	0.984114	2008
Steidle	Tatjana	22	11.83	22	24.4	29	0.969672	2008
Wackershauser	Anja	20	11.83	23	23.75	6	0.996211	2008
Wagner	Marion	31	11.24	2	23.65	5	0.950529	2009
Möllinger	Anne	24	11.34	3	23.64	4	0.959391	2009
Schorr	Lisa	27	11.34	4	23.94	12	0.947368	2009
Tschirch	Kathleen	30	11.35	5	23.3	3	0.974249	2009
Kwadwo	Yasmin	19	11.38	6	23.89	9	0.9527	2009
Köhler	Karoline	25	11.43	7	24.13	14	0.947368	2009
Günther	Leena	18	11.44	8	23.34	26	0.980291	2009
Dix	Maike	23	11.62	11	23.26	1	0.99914	2009
Nwachukwu	Sorina	22	11.62	12	23.69	6	0.981005	2009
Peters	Mareike	23	11.66	14	23.93	11	0.974509	2009
Marschek	Beatrice	24	11.81	26	24.13	15	0.978864	2009
Frewer	Christina	23	11.82	28	24.29	18	0.97324	2009
Schrödel	Silvana	18	11.82	29	24.43	29	0.967663	2009
Möllinger	Anne	25	11.33	3	23.5	3	0.964255	2010
Wagner	Marion	32	11.49	6	23.83	10	0.964331	2010
Pähler	Stefanie	17	11.54	8	24.22	25	0.952931	2010
Köhler	Karoline	26	11.58	9	23.83	9	0.971884	2010
Schulze	Maren	28	11.6	10	23.56	4	0.98472	2010
Lindenberg	Janin	23	11.63	12	23.82	8	0.97649	2010
Marscheck	Beatrice	25	11.68	14	24.07	15	0.970503	2010
Peters	Mareike	24	11.75	15	23.75	6	0.989474	2010
Haase	Rebekka	17	11.79	18	24.27	30	0.97157	2010
Jäpel	Sara	21	11.8	20	23.75	7	0.993684	2010
Dix	Maike	24	11.83	23	23.49	2	1.00724	2010
Seer	Tamara	21	11.84	25	23.99	13	0.987078	2010
Haack	Christina	23	11.87	28	24.1	18	0.985062	2010
Wackershauser	Ankja	22	11.88	30	23.7	5	1.00253	2010
Kwadwo	Yasmin	21	11.29	1	23.84	12	0.947148	2011
Günther	Leena	20	11.33	2	23.64	7	0.958545	2011
Haack	Christina	24	11.41	5	23.36	2	0.976884	2011
Tschirsch	Cathleen	31	11.44	6	23.23	1	0.984933	2011
Kedzierski	Johanna	27	11.59	8	23.7	9	0.978059	2011
Köhler	Karoline	27	11.59	9	24	20	0.965833	2011
Grompe	Katharina	18	11.65	11	23.55	2	0.989384	2011
Schulze	Maren	29	11.72	12	23.83	10	0.983634	2011
Dix	Maike	25	11.74	13	23.62	6	0.994073	2011
Peters	Mareike	25	11.77	15	24.15	22	0.974741	2011
Frewer	Christina	24	11.77	16	24.32	28	0.967928	2011
Lindenberg	Janin	24	11.79	19	23.69	8	0.995357	2011
Haase	Rebekka	18	11.8	21	23.98	18	0.984153	2011
Seer	Tamara	22	11.83	23	23.85	13	0.992034	2011
Weit	Inna	23	11.86	28	24.08	21	0.98505	2011
Cibis	Anne	27	11.17	2	23.15	3	0.965011	2012
Tschirsch	Cathleen	33	11.3	4	22.98	1	0.983464	2012
Cremer	Esther	24	11.44	7	23.25	4	0.984086	2012
Weit	Inna	24	11.46	8	23.08	2	0.993068	2012
Mayer	Ida	19	11.47	9	24.14	16	0.95029	2012
Moll	Carolyn	22	11.54	11	24.3	22	0.949794	2012
Frewer	Christina	26	11.57	13	23.68	8	0.977196	2012
Hufschmidt	Deborah	22	11.58	14	24.32	23	0.952303	2012
Dix	Maike	26	11.62	15	23.39	5	0.993587	2012
Haack	Christina	25	11.63	16	23.46	6	0.991475	2012
Marscheck	Beatrice	27	11.67	20	24.24	20	0.962871	2012
Feizbakhsh	Maral	22	11.75	23	23.84	11	0.985738	2012
Riedl	Martina	20	11.78	27	23.95	12	0.983716	2012
Jäpel	Sara	23	11.87	29	24.12	15	0.984245	2012
Weit	Inna	25	11.39	3	23.1	1	0.986147	2013
Cremer	Esther	25	11.49	7	23.61	8	0.973316	2013
Dix	Maike	27	11.52	8	23.33	3	0.98757	2013
Haase	Rebekka	20	11.55	9	23.8	12	0.970588	2013
Grompe	Katharina	20	11.58	11	23.53	7	0.984275	2013
Hufschmidt	Deborah	23	11.58	12	23.93	15	0.967823	2013
Lückenkemper	Gina	17	11.61	13	23.35	4	0.994433	2013
Kedzierski	Johanna	29	11.61	14	23.52	6	0.987245	2013
Mayer	Lisa	17	11.63	16	23.75	10	0.979368	2013
Biesenbach	Kira	21	11.66	19	23.45	5	0.994456	2013
Elsler	Josefina	22	11.77	26	24.07	18	0.977981	2013
Seer	Tamara	24	11.83	30	23.87	13	0.991202	2013
Haase	Rebekka	21	11.32	3	23.01	1	0.98392	2014
Elsler	Josefina	23	11.33	4	23.33	6	0.971282	2014
Weit	Inna	26	11.39	5	23.18	3	0.982744	2014
Cremer	Esther	26	11.44	7	23.15	2	0.988337	2014
Gonska	Nadine	24	11.53	9	23.27	5	0.990976	2014
Lückenkemper	Gina	18	11.54	10	23.26	4	0.992261	2014
Haack	Christina	27	11.64	12	23.88	15	0.974874	2014
Kwayie	Lisa-Marie	18	11.66	15	23.86	12	0.977368	2014
Nwachukwu	Sorina	27	11.7	18	23.73	9	0.986094	2014
Leffler	Celina	18	11.72	20	23.9	18	0.980753	2014
Häfele	Sabrina	21	11.73	22	23.89	16	0.982001	2014
Matheis	Lara	22	11.77	26	23.86	13	0.986588	2014
Seer	Tamara	25	11.78	27	24.01	23	0.981258	2014
Wachtel	Franziska	20	11.79	28	24.06	26	0.98005	2014
Haase	Rebekka	22	11.21	2	22.95	1	0.976906	2015
Pinto	Tatjana	23	11.23	3	23.02	2	0.975673	2015
Lückenkemper	Gina	19	11.25	4	23.04	3	0.976562	2015
Freese	Anna-Lena	21	11.3	5	23.08	4	0.979203	2015
Mayer	Lisa	19	11.31	7	23.29	5	0.971232	2015
Haack	Christina	28	11.49	10	23.7	11	0.96962	2015
Elsler	Josefina	24	11.51	11	23.77	12	0.968448	2015
Weit	Inna	27	11.53	12	23.35	6	0.98758	2015
Müller	Laura	20	11.54	13	23.49	8	0.982546	2015
Seer	Tamara	26	11.64	17	23.95	18	0.972025	2015
Lobe	Ricarda	21	11.66	19	24.08	24	0.968439	2015
Matheis	Lara	23	11.7	23	23.89	14	0.979489	2015
Dinkeldein	Sandra	22	11.72	25	23.94	17	0.979114	2015
Maduka	Jessie	19	11.76	28	24.15	29	0.973913	2015
Lückenkemper	Gina	20	11.04	2	22.67	1	0.973974	2016
Haase	Rebekka	23	11.22	3	23.16	5	0.968912	2016
Mayer	Lisa	20	11.25	4	22.86	4	0.984252	2016
Elsler	Josefina	25	11.33	5	23.16	7	0.978411	2016
Weit	Inna	28	11.35	7	23.16	6	0.980138	2016
Müller	Laura	21	11.37	9	22.81	3	0.996931	2016
Gonska	Nadine	26	11.43	10	22.79	2	1.00307	2016
Fehm	Katrin	28	11.43	11	23.67	13	0.965779	2016
Kwayie	Lisa-Marie	20	11.67	18	24.14	30	0.96686	2016
Haack	Christina	29	11.69	23	23.68	14	0.987331	2016
Kittner	Svea	23	11.75	25	24.07	26	0.976319	2016
Nippgen	Lisa	19	11.75	26	24.01	24	0.978759	2016
Matheis	Lara	24	11.76	28	23.72	25	0.991568	2016
Junk	Sophia	17	11.78	29	24.07	27	0.978812	2016
Lückenkemper	Gina	21	10.95	1	23.04	5	0.950521	2017
Haase	Rebekka	24	11.06	2	22.78	3	0.971027	2017
Mayer	Lisa	21	11.14	3	22.64	1	0.984099	2017
Pinto	Tatjana	25	11.24	4	23.88	17	0.941374	2017
Montag	Jennifer	19	11.29	7	23.73	15	0.951538	2017
Kwadwo	Keshia	18	11.33	9	23.89	18	0.948514	2017
Matheis	Lara	25	11.29	8	23.13	6	0.976221	2017
Müller	Laura	22	11.36	10	22.65	2	1.00309	2017
Nippgen	Lisa	20	11.41	11	23.92	24	0.954013	2017
Kwayie	Lisa-Marie	21	11.44	13	23.8	16	0.961345	2017
Fehm	Kathrin	19	11.46	14	23.49	10	0.975734	2017
Gonska	Nadine	27	11.46	15	22.93	4	0.999564	2017
Junk	Sophia	18	11.52	18	23.35	9	0.986724	2017
Wessoly	Jessica Bianca	21	11.63	23	23.26	7	1	2017
Eidner	Tiffany	20	11.68	26	23.64	14	0.988156	2017
Kaltenmeyer	lAena	23	11.7	27	23.55	12	0.993631	2017
Weit	Inna	29	11.73	28	23.9	22	0.98159	2017
Burghardt	Alexandra	24	11.48	15.	23.57	12.	0.97412	2018
Eidner	Tiffany	21	11.43	10.	23.65	15.	0.966596	2018
Freese	Anna-Lena	24	11.72	30.	23.88	20.	0.981575	2018
Frommann	Eleni	21	11.67	25.	23.83	19.	0.979438	2018
Gonska	Nadine	28	11.68	27.	23.14	6.	1.00951	2018
Haase	Rebekka	25	11.35	6.	23.12	5.	0.981834	2018
Junk	Sophia	19	11.48	14.	23.4	8.	0.981197	2018
Kramer	Pernilla	22	11.57	19.	23.52	10.	0.983844	2018
Matheis	Lara	26	11.64	22.	23.98	26.	0.970809	2018
Montag	Jennifer	20	11.33	5.	23.5	9.	0.964255	2018
Müller	Laura	23	11.26	3.	22.87	2.	0.984696	2018
Nippgen	Lisa	21	11.43	9.	23.96	24.	0.95409	2018
Pinto	Tatjana	26	11.11	2.	22.84	1.	0.972855	2018
Schwab	Corinna	19	11.66	24.	23.55	11.	0.990234	2018
Wessolly	Jessica-Bianca	22	11.37	8.	22.89	3.	0.993447	2018
Burghardt	Alexandra	25	11.51	14.	23.46	5.	0.981245	2019
Dinkeldein	Sandra	26	11.58	19.	23.63	9.	0.98011	2019
Freese	Anna-Lena	25	11.43	11.	23.63	10.	0.967414	2019
Junk	Sophia	20	11.46	12.	23.38	4.	0.980325	2019
Lederer	Amelie-Sophie	25	11.42	10.	23.66	12.	0.965342	2019
Müller	Laura	24	11.15	3.	23.67	13.	0.942121	2019
Pfetsch	Svenja	18	11.65	26.	23.82	16.	0.97817	2019
Pinto	Tatjana	27	11.09	1.	22.63	1.	0.980115	2019
Prepens	Talea	18	11.56	16.	24.01	21.	0.962932	2019
Schwab	Corinna	20	11.65	25.	23.77	15.	0.980227	2019
Uphoff	Denise	19	11.62	20.	24.18	28.	0.961125	2019
Wessolly	Jessica-Bianca	23	11.36	8.	23.05	3.	0.985683	2019
Wulf	Jasmin	22	11.71	30.	24.05	23.	0.973805	2019
Dinkeldein	Sandra	27	11.62	19.	24.12	22.	0.963516	2020
Eidner	Tiffany	23	11.76	27.	24.18	26.	0.972705	2020
Haase	Rebekka	27	11.11	1.	23.15	4.	0.959827	2020
Holzmann	Anna	24	11.65	22.	24.01	17.	0.970429	2020
Junk	Sophia	21	11.42	13.	23.42	7.	0.975235	2020
Kaden	Lilly	19	11.32	8.	23.7	12.	0.955274	2020
Kwayie	Lisa Marie	24	11.19	2.	23.14	2.	0.967156	2020
Lederer	Amelie-Sophie	26	11.29	5.	23.43	8.	0.963722	2020
Müller	Laura	25	11.34	9.	23.14	3.	0.980121	2020
Nippgen	Lisa	23	11.29	6.	23.46	9.	0.962489	2020
Oguama	Synthia	22	11.7	24.	23.71	13.	0.986925	2020
Prepens	Talea	19	11.41	12.	23.39	6.	0.975631	2020
Scherzl	Marina	21	11.69	23.	24.03	18.	0.97295	2020
Schwab	Corinna	21	11.39	11.	23.23	5.	0.980628	2020
Wessolly	Jessica-Bianca	24	11.44	14.	23.07	1.	0.991764	2020
Burghardt	Alexandra	27	11.01	1.	23	6.	0.957391	2021
Cataria-Byll	Brenda	20	11.64	25.	24.08	27.	0.966777	2021
Freese	Anna-Lena	27	11.58	19.	23.85	19.	0.971069	2021
Haase	Rebekka	28	11.21	6.	22.89	3.	0.979467	2021
Hafner	Sabrina	18	11.65	26.	23.71	16.	0.982708	2021
Junk	Sophia	22	11.3	10.	22.87	2.	0.988194	2021
Kaden	Lilly	20	11.28	8.	23.32	10.	0.96741	2021
Kwayie	Lisa Marie	25	11.29	9.	22.96	4.	0.983449	2021
Mayer	Sina	26	11.26	7.	23.97	24.	0.939508	2021
Müller	Laura	26	11.58	20.	23.5	13.	0.985532	2021
Pinto	Tatjana	29	11.1	2.	23.26	8.	0.954428	2021
Prepens	Talea	20	11.45	14.	23.15	7.	0.989201	2021
Scherzl	Marina	22	11.64	24.	23.83	17.	0.97692	2021
Schwab	Corinna	22	11.38	12.	22.69	1.	1.00309	2021
Wessolly	Jessica-Bianca	25	11.47	16.	22.96	5.	0.999129	2021
Benzinger	Tina	21	11.59	28.	23.63	15.	0.980956	2022
Burghardt	Alexandra	28	11.29	5.	23.04	3.	0.980035	2022
Franzen	Judith	23	11.56	20.	23.37	9.	0.989303	2022
Haase	Rebekka	29	11.2	2.	22.93	2.	0.976886	2022
John	Viola	19	11.57	23.	23.9	22.	0.968201	2022
Junk	Sophia	23	11.42	13.	23.27	7.	0.981521	2022
Kaden	Lilly	21	11.36	7.	23.21	5.	0.978888	2022
Kadiri	Chelsea	17	11.5	17.	24.15	29.	0.952381	2022
Körner	Marlene	19	11.58	25.	23.48	12.	0.986371	2022
Kwayie	Lisa Marie	26	11.37	9.	23.27	6.	0.977224	2022
Müller	Laura	27	11.59	26.	23.55	13.	0.984289	2022
Nippgen	Lisa	25	11.3	6.	23.44	11.	0.964164	2022
Okuku	Holly	17	11.59	27.	23.62	14.	0.981372	2022
Prepens	Talea	21	11.42	14.	23.3	8.	0.980258	2022
Scherzl	Marina	23	11.61	30.	23.44	10.	0.990614	2022
Schwab	Corinna	23	11.38	11.	22.51	1.	1.01111	2022
Wessolly	Jessica-Bianca	26	11.52	18.	23.14	4.	0.995678	2022
