# Supplementary material for: Sex-specific characteristics of special endurance and performance potential in female runners
Source: BMC Res Notes. 2025 Apr 26;18:196. doi: 10.1186/s13104-025-07256-6 (PMC12032771; doi:10.1186/s13104-025-07256-6)
Supplement: Supplementary file 2 — Supplementary Material 2 [file 13104_2025_7256_MOESM2_ESM.xlsx]

## Sheet: Tabelle1
name	first name	age	sec 400m	placement 400m	sec 800m	placement 800m	KsA value	year
Klinger	Margrit	20	53.4	8	119.2	1	0.895973	1980
Kleinbrahm	Petra	21	53.6	11	121.51	3	0.882232	1980
Brückner	Brigitte	24	54.79	22	125.2	12	0.87524	1980
Hook	Usula	23	55	27	123.2	9	0.892857	1980
Büngener	Simone	18	55	28	122.21	7	0.90009	1980
Pastoor	Beate	18	55.24	29	125.49	13	0.880389	1980
Everts	Sabine	20	52.8	8	128.34	27	0.822814	1981
Klinger	Margrit	21	53.98	10	119.54	1	0.903129	1981
Büngener	Simone	20	54.2	15	121.69	4	0.890788	1982
Kleinbrahm	Petra	23	54.7	21	123.43	7	0.886332	1982
Krott	Martina	24	54.8	23	120.54	3	0.909242	1982
Bens	Monika	16	55.21	30	126.65	14	0.871852	1982
Bußmann	Gaby	24	49.75	1	119.39	3	0.833403	1983
Everts	Sabine	22	52.37	9	126.17	19	0.83015	1983
Bens	Monika	17	53.6	13	121.29	5	0.883832	1983
Karck	Dagmar	30	53.9	15	128.48	30	0.839041	1983
Klinger	Margrit	23	54.26	17	118.01	1	0.919583	1983
Schultheiß	Margit	29	54.33	19	122.29	6	0.888544	1983
Bätjer	Anke	25	54.45	20	124.8	12	0.872596	1983
Brückner	Brigitte	27	54.8	26	122.98	8	0.891202	1983
Kleinbrahm	Petra	24	54.82	28	122.46	7	0.895313	1983
Huneke	Heike	18	53.7	14	123.59	9	0.869002	1984
Nolte	Sabine	18	54.33	18	127.7	27	0.850901	1984
Zwiener	Sabine	17	54.41	20	126.9	20	0.857526	1984
Bens	Monika	18	54.9	27	122.45	3	0.896693	1984
Lesch	Gabriele	21	53.13	8	122.22	3	0.869416	1985
Huneke	Heike	19	54.25	17	123.16	9	0.880968	1985
Zwiener	Sabine	18	54.46	24	126.35	22	0.86205	1985
Schultheiß	Margit	29	54.91	28	122.72	6	0.894883	1985
Bußmann	Gaby	27	51.71	3	118.11	1	0.875624	1986
Lix	Ute	21	52.3	6	127.07	26	0.823168	1986
Zwiener	Sabine	19	53.45	9	125.33	13	0.852948	1986
Leistenscheider	Nicole	19	53.83	14	127.36	29	0.84532	1986
Brückner	Brigitte	20	54.1	16	122.03	4	0.886667	1986
Nolte	Sabine	25	54.75	29	125.81	16	0.87036	1986
Wilhelm	Angela	27	54.78	30	125.21	11	0.87501	1986
Zwiener	Sabine	20	53.75	10	121.42	3	0.885357	1987
Lesch	Gabriele	23	53.98	14	121.7	5	0.887099	1987
Lix	Ute	22	54.3	21	121.68	4	0.892505	1987
Lesch	Gabriele	24	53.18	8	119.42	2	0.890638	1988
Zwiener	Sabine	21	53.56	11	119.33	1	0.897679	1988
Bußmann	Gaby	29	53.85	12	127.88	26	0.842196	1988
Lix	Ute	23	54.78	28	120.89	3	0.906278	1988
Lesch	Gabriele	25	53.19	4	119.28	1	0.891851	1989
Lix	Karin	24	53.38	5	122.55	4	0.871155	1989
Lix	Ute	24	54.78	16	121.52	2	0.90158	1989
Lix	Karin	25	53.23	6	121.66	3	0.875062	1990
Lesch	Gabriele	26	53.43	7	119.85	1	0.891615	1990
Leistenschneider	Nicole	23	54.44	18	123.79	6	0.879554	1990
Oppermann	Heike	19	54.84	26	128.5	28	0.853541	1990
Kaufmann	Sonja	25	55.1	30	125.56	9	0.877668	1990
Grau	Sigrun	26	51.87	3	119.29	3	0.869645	1991
Wachtel	Sabine	26	52.2	6	118.84	1	0.878492	1991
Bruhns	Birte	21	53.07	13	119.55	4	0.887829	1991
Lesch	Gabriele	27	53.72	19	119.24	2	0.90104	1991
Leistenschneider	Nicole	24	54.2	23	123.27	10	0.87937	1991
Grau	Sigrun	27	51.94	2	118.53	1	0.876403	1992
Rieger	Silvia	22	53.54	16	127.21	23	0.841758	1992
Lesch	Gabriele	28	53.83	21	120.38	4	0.894335	1992
Zwiener	Sabine	24	54.225	25	119.83	3	0.905032	1992
Leistenschneider	Nicole	25	54.42	26	122.1	7	0.8914	1992
Zwiener	Sabine	25	53.86	15	120.77	3	0.891943	1993
Steimle	Silvia	21	53.65	12	127.98	15	0.838412	1994
Schiefer	Karen	27	54.11	16	128.25	17	0.843821	1994
Wachtel	Christine	29	54.81	28	121.84	3	0.899705	1994
Urbansky	Ulrike	18	53.48	11	124.22	8	0.861053	1995
Hartlieb	Marlies	32	54.95	24	123.74	7	0.888153	1995
Kisabaka	Linda	27	51.16	3	118.24	1	0.865359	1996
Urbansky	Ulrike	19	52.87	10	122.96	6	0.859954	1996
Beutelspacher	Simone	23	54.37	23	123.81	9	0.878281	1996
Gesell	Claudia	19	54.37	24	122.67	3	0.886443	1996
Friedrich	Kathleen	19	54.561	25	122.7	5	0.88934	1996
Beutelspacher	Simone	23	54.75	20	124.54	11	0.879236	1997
Meißner	Heike	28	53.03	10	119.5	1	0.887531	1998
Beutelspacher	Simone	24	54.33	14	123.41	9	0.88048	1988
Beutelspacher	Simone	25	53.13	12	122.44	5	0.867854	1999
Schott	Maren	24	53.6	15	123.64	7	0.867033	2000
Beutelspacher	Simone	26	53.86	19	123.52	6	0.872085	2000
Teichmann	Yvonne	24	53.25	10	118.62	1	0.897825	2001
Beutelspacher	Simone	27	54.59	20	123.02	4	0.887498	2001
Knippel	Anja	27	55.22	29	122.55	2	0.901183	2001
Knippel	Anja	28	53.97	10	120.11	2	0.898676	2002
Teichmann	Yvonne	25	54.19	14	119.06	1	0.910297	2002
Beutelspacher	Simone	28	54.25	15	123.97	7	0.875212	2002
Gradzki	Monika	23	54.87	27	122.52	5	0.89569	2002
Gradzki	Monika	24	54.4	17	120.96	3	0.899471	2003
Knippel	Anja	25	55.15	26	120.81	2	0.913004	2003
Beutelspacher	Simone	29	55.15	27	125.35	10	0.879936	2003
Dienel	Diana	16	54.13	14	124.34	9	0.870677	2004
Gradzki	Monika	25	55.23	30	121.22	1	0.911236	2004
Gradzki	Monika	26	54.7	12	121	1	0.904132	2005
Friedrich	Kathleen	28	54.84	15	121.45	2	0.903088	2005
Schmitt	Kristiane	17	55	17	129.18	26	0.851525	2005
Buchrucker	Sabrina	16	55.36	29	126.45	14	0.875603	2005
Walter	Carolin	18	54.42	13	129.58	30	0.839944	2006
Gradzki	Monika	28	54.71	15	121.15	1	0.903178	2007
Dienel	Diana	19	55.41	26	125.73	8	0.881413	2007
Buchrucker	Sabrina	18	55.44	27	125.74	9	0.88182	2007
Hoffmann	Claudia	26	52.05	2	123.87	3	0.840397	2008
Harrer	Corinna	17	55.18	29	126.95	14	0.869319	2008
Hoffmann	Claudia	27	52.43	2	123.38	4	0.849895	2009
Pilawa	Karoline	24	55.21	30	123.48	5	0.894234	2009
Hoffmann	Claudia	28	51.65	1	121.18	2	0.852451	2010
Kohlmann	Fabienne	21	52.3	4	120.72	1	0.866468	2010
Zwirner	Christina	18	54.06	16	128.19	24	0.843436	2010
Harrer	Corinna	19	55.23	24	124.28	5	0.888799	2010
Krebs	Aline	22	55.25	25	125.15	12	0.88294	2010
Hoffmann	Claudia	29	52.15	3	123.82	9	0.842352	2011
Kohlmann	Fabienne	23	52.97	3	126.28	21	0.838929	2012
Mosler	Sonja	19	53.96	11	122.82	6	0.878684	2012
Walter	Carolin	24	54.41	16	125.43	15	0.867576	2012
Menzel	Lena	21	55.23	30	125.6	19	0.879459	2012
Hering	Christina	19	53.6	5	123.11	5	0.870766	2013
Kohlmann	Fabienne	24	53.95	9	123.61	7	0.872907	2013
Pilawa	Karoline	28	54.86	25	124.77	16	0.879378	2013
Hering	Christina	20	53.75	12	121.25	1	0.886598	2014
Ferenz	Daniela	24	54.13	15	125.61	19	0.861874	2014
Walter	Carolin	26	54.84	22	123.11	4	0.890911	2014
Kohlmann	Fabienne	25	53.37	8	121.7	2	0.877075	2014
Kohlmann	Fabienne	26	52.82	3	118.34	1	0.892682	2015
Hering	Christina	21	52.91	4	119.54	2	0.885227	2015
Schmidt	Sarah	19	53.19	6	121.44	3	0.875988	2015
Walter	Carolin	26	54.64	20	123.47	5	0.885073	2015
Hering	Christina	22	53.41	6	120.37	1	0.88743	2016
Schmidt	Sarah	20	55.36	30	123.78	7	0.89449	2016
Walter	Carolin	28	54.14	13	124.26	8	0.871399	2016
Reinert	Jana	18	54.69	21	127.33	21	0.859028	2016
Hering	Christina	23	53.29	9	120.77	2	0.882504	2017
Reinert	Jana	19	54.88	30	124.67	7	0.880404	2017
Hering	Christina	24	54.09	15.	120.48	1.	0.897908	2018
Pahlitzsch	Karolina	24	53.24	7.	128.27	25.	0.830124	2018
Schmidt	Sarah	22	55.19	26.	122.04	2.	0.904458	2018
Spill	Tanja	23	55.17	25.	122.26	3.	0.902503	2018
Hering	Christina	25	53.98	13.	119.41	1.	0.904112	2019
Scheppan	Marie	18	53.5	11.	129.89	30.	0.823774	2019
Scheppan	Marie	19	54.84	23.	129.3	29.	0.84826	2020
Sommer	Sophia	25	54.8	21.	127.91	20.	0.856852	2020
Spill	Tanja	25	55.18	29.	122.07	3.	0.904071	2020
Kolberg	Majtie	22	54.58	26.	119.24	2.	0.915465	2021
Sommer	Sophia	26	54.4	23.	127.53	22.	0.853133	2021
Hering	Christina	28	53.58	14.	119.51	1.	0.896661	2022
Schorr	Maja	18	53.37	12.	128.81	30.	0.828662	2022
