# Supplementary material for: Sex-specific characteristics of special endurance and performance potential in female runners
Source: BMC Res Notes. 2025 Apr 26;18:196. doi: 10.1186/s13104-025-07256-6 (PMC12032771; doi:10.1186/s13104-025-07256-6)
Supplement: Supplementary file 3 — Supplementary Material 3 [file 13104_2025_7256_MOESM3_ESM.xlsx]

## Sheet: 100-200
name, first name	date of birth	nation	sec 100m	sec 200m	KsA
ADAM Georgina	24 MAR 2000	GBRGBR	11.39	22.87	0.996065
ADEOYE Margaret	22 APR 1985	GBRGBR	11.28	22.88	0.986014
AGYAPONG Finette	01 FEB 1997	GBRGBR	11.21	22.69	0.9881
AKINBILEJE Faith	21 SEP 2005	GBRGBR	11.53	23.44	0.983788
ALIU Immanuela	19 APR 2000	GBRGBR	11.41	23.44	0.973549
ANDERSON Shani	07 AUG 1975	GBRGBR	11.32	22.96	0.986063
ANIA Emma	07 FEB 1979	GBRGBR	11.21	23.25	0.964301
ANNING Amber	18 NOV 2000	GBRGBR	11.49	23.31	0.985843
ASHER-SMITH Dina	04 DEC 1995	GBRGBR	10.83	21.88	0.989945
ASHMEADE Leonie	26 JAN 2001	GBRGBR	11.43	24	0.9525
AWUAH Kristal	07 AUG 1999	GBRGBR	11.16	23.05	0.96833
BAPTISTE Joan	12 OCT 1959	GBRGBR	11.32	22.86	0.990376
BAPTISTE Kimbely	27 DEC 1992	GBRGBR	11.38	23.34	0.97515
BARNETT Helen	13 MAY 1958	GBRGBR	11.45	23.14	0.989628
BELL Alyson	09 NOV 2003	GBRGBR	11.31	23.93	0.945257
BLOOMFIELD Christine	12 FEB 1968	GBRGBR	11.32	22.85	0.99081
BLOOR Louise	21 SEP 1985	GBRGBR	11.43	23.31	0.980695
BRIER Hannah	03 FEB 1998	GBRGBR	11.33	23.29	0.97295
BURNSIDE-DEACON Susan	03 FEB 1980	GBRGBR	11.56	23.6	0.979661
CALLENDER Bev	28 AUG 1956	GBRGBR	11.22	22.72	0.987676
CAMPSALL Rebecca	02 OCT 1990	GBRGBR	11.53	23.79	0.969315
CEESAY Amina	19 NOV 1979	GBRGBR	11.6	23.97	0.967877
CLARK Zoey	25 OCT 1994	GBRGBR	11.54	23.36	0.988014
COOK Kathy	03 MAY 1960	GBRGBR	11.1	22.1	1.00452
DANVILLE Sharon	22 APR 1955	GBRGBR	11.35	23.98	0.946622
DAVIES Samantha	20 SEP 1979	GBRGBR	11.44	23.06	0.992194
DOBBIN Beth	07 JUN 1994	GBRGBR	11.46	22.5	1.01867
DOUGLAS Montell	24 JAN 1986	GBRGBR	11.05	23.34	0.946872
DOUGLAS Stephanie	22 JAN 1969	GBRGBR	11.27	23.3	0.967382
DUBARRY-GAY Kiah	15 NOV 2001	GBRGBR	11.34	23.29	0.973809
DUCK Joey	14 APR 1989	GBRGBR	11.6	23.46	0.988917
DUNN-THOMAS Paula	03 DEC 1964	GBRGBR	11.15	22.69	0.982812
EDUAN Success	27 SEP 2004	GBRGBR	11.39	23.2	0.981897
ENDACOTT Katherine	29 JAN 1980	GBRGBR	11.44	23.56	0.971138
EZE Joy	31 MAY 2004	GBRGBR	11.44	23.61	0.969081
FORRESTER Amanda	29 SEP 1978	GBRGBR	11.34	23.94	0.947368
FRASER Donna	07 NOV 1972	GBRGBR	11.53	23.05	1.00043
FREEMAN Emily	24 NOV 1980	GBRGBR	11.33	22.64	1.00088
GOLDEN Helen	16 MAY 1953	GBRGBR	11.59	23.14	1.00173
HENRY Desiree	26 AUG 1995	GBRGBR	11.06	22.46	0.984862
HOYTE Wendy	17 DEC 1957	GBRGBR	11.31	23.82	0.949622
HUMPHREYS Corinne	07 NOV 1991	GBRGBR	11.39	24.03	0.947982
HUNT Amy	15 MAY 2002	GBRGBR	11.31	22.42	1.00892
HYLTON Shannon	19 DEC 1996	GBRGBR	11.44	22.78	1.00439
JACOBS Simmone Kim	05 SEP 1966	GBRGBR	11.31	22.95	0.985621
JAMES Della	28 MAR 1949	GBRGBR	11.36	23.72	0.957841
JAMES Vernicha	06 JUN 1984	GBRGBR	11.4	22.93	0.994331
JOHNCOCK Rachel	04 OCT 1993	GBRGBR	11.45	23.74	0.964617
KWAKYE Jeanette	20 MAR 1983	GBRGBR	11.14	23.11	0.964085
LANNAMAN Sonia	24 MAR 1956	GBRGBR	11.2	22.58	0.992028
LANSIQUOT Imani	17 DEC 1997	GBRGBR	11.01	22.93	0.960314
LEWIS Annabelle	20 MAR 1989	GBRGBR	11.36	23.9	0.950628
LONGDEN Hannah	04 DEC 2000	GBRGBR	11.54	23.69	0.974251
MADUAKA Joice	30 SEP 1973	GBRGBR	11.23	22.83	0.983793
MCLEOD Geraldine	24 SEP 1971	GBRGBR	11.57	23.64	0.978849
MERRY Katharine	21 SEP 1974	GBRGBR	11.34	22.76	0.996485
MILLER Rachel	29 JAN 1990	GBRGBR	11.36	23.94	0.949039
MILLS-JONES Hayley	14 SEP 1990	GBRGBR	11.31	23.29	0.971232
MURPHY Catherine	21 SEP 1975	GBRGBR	11.48	23.28	0.986254
NEITA Daryll	29 AUG 1996	GBRGBR	10.9	22.23	0.980657
NELSON Ashleigh	20 FEB 1991	GBRGBR	11.19	22.85	0.979431
NIELSEN Laviai	13 MAR 1996	GBRGBR	11.51	23.81	0.966821
NWAWULOR-KAZEMAKS Marilyn	20 SEP 1992	GBRGBR	11.59	24.14	0.960232
OAKES Heather	14 AUG 1959	GBRGBR	11.2	22.92	0.977312
OBIJAKU Amanda	26 AUG 2003	GBRGBR	11.57	23.79	0.972678
OFILI Cindy	05 AUG 1994	GBRGBR	11.43	23.46	0.974425
OHURUOGU Christine	17 MAY 1984	GBRGBR	11.35	22.85	0.993435
O'NEILL Elaine	20 AUG 1989	GBRGBR	11.39	23.58	0.966073
ONUORA Anyika	28 OCT 1984	GBRGBR	11.18	22.64	0.987633
OXLEY Sarah	03 JUL 1973	GBRGBR	11.51	23.2	0.992241
OYEPITAN Abiodun	30 DEC 1979	GBRGBR	11.17	22.5	0.992889
PAPPS Sophie	06 OCT 1994	GBRGBR	11.27	23.3	0.967382
PEMBERTON Cassie-Ann	24 JUL 2001	GBRGBR	11.43	22.79	1.00307
PHILIP Asha	25 OCT 1990	GBRGBR	11.1	23.45	0.946695
PIPI Ama	26 NOV 1995	GBRGBR	11.56	22.95	1.00741
REES Alisha	16 APR 1999	GBRGBR	11.3	23.32	0.969125
REGIS Renee	02 SEP 2005	GBRGBR	11.39	23.59	0.965663
RICHARDSON Marcia	10 FEB 1972	GBRGBR	11.35	23.53	0.964726
SAUNDERS Andrea	24 NOV 1952	GBRGBR	11.16	24.22	0.921552
SCOTT Sabrina	02 JUN 1979	GBRGBR	11.58	23.73	0.97598
SHAND-WHITTINGHAM Anike	13 AUG 1989	GBRGBR	11.6	24.26	0.956307
SIBBONS Aleeya	05 NOV 2002	GBRGBR	11.33	23.82	0.951301
SPENCER Amy	19 SEP 1985	GBRGBR	11.6	23.45	0.989339
TAGOE Annie	04 JUN 1993	GBRGBR	11.43	24.05	0.95052
THOMAS Kadi-Ann	10 FEB 1986	GBRGBR	11.41	23.28	0.980241
THOMPSON Shauna	08 APR 1992	GBRGBR	11.46	23.42	0.978651
TURNER Laura	12 AUG 1982	GBRGBR	11.11	23.29	0.954058
UGEN Lorraine	22 AUG 1991	GBRGBR	11.32	23.81	0.950861
WALKER Diani	14 JUL 1995	GBRGBR	11.45	23.72	0.96543
WEDDERBURN-GOODISON Nia	09 JAN 2005	GBRGBR	11.33	23.59	0.960577
WHITLOCK Janine	11 AUG 1973	GBRGBR	11.56	23.3	0.992275
WHITTAKER Sandra	29 JAN 1963	GBRGBR	11.51	22.98	1.00174
WILHELMY Sarah	02 FEB 1980	GBRGBR	11.44	23.23	0.984933
WILLIAMS Bianca	18 DEC 1993	GBRGBR	11.17	22.58	0.989371
WILLIAMS Hannah	23 APR 1998	GBRGBR	11.49	23.38	0.982891
WILLIAMS Jodie	28 SEP 1993	GBRGBR	11.17	22.46	0.994657
WILSON Bernice	21 APR 1984	GBRGBR	11.57	23.77	0.973496
WRIGHT Eve	08 AUG 2002	GBRGBR	11.54	24.13	0.956486

## Sheet: 200-400
name, first name	date of birth	nation	sec 200m	sec 400m	KsA
ABICHI Mary	19 NOV 1990	GBR GBR	24.01	52.6	0.912928
ADEOYE Margaret	22 APR 1985	GBR GBR	22.88	51.93	0.881186
AGYAPONG Finette	01 FEB 1997	GBR GBR	22.69	52.41	0.865865
ALLCOCK Amy	20 AUG 1993	GBR GBR	23.48	51.36	0.91433
ANNING Amber	18 NOV 2000	GBR GBR	23.31	51.62	0.903138
BACKFORD Pat	06 AUG 1965	GBR GBR	23.6	52.26	0.903176
BARNETT Helen	13 MAY 1958	GBR GBR	23.14	52.12	0.887951
BARR Victoria	14 APR 1982	GBR GBR	23.79	52.4	0.908015
BEESLEY Meghan	15 NOV 1989	GBR GBR	23.53	52.79	0.891457
BOARD Lillian	13 DEC 1948	GBR GBR	23.49	52.12	0.901381
BUNDY-DAVIES Seren	30 DEC 1994	GBR GBR	24.03	51.26	0.937573
CLARK Zoey	25 OCT 1994	GBR GBR	23.36	51.22	0.912144
COOK Kathy	03 MAY 1960	GBR GBR	22.1	49.43	0.894194
COX Shana	22 JAN 1985	GBR GBR	23.38	51.12	0.91471
CURBISHLEY Allison	03 JUN 1976	GBR GBR	23.33	50.71	0.920134
DIAMOND Emily	11 JUN 1991	GBR GBR	23.3	51.23	0.909623
DUDGEON Sinead	09 JUL 1976	GBR GBR	23.59	52.05	0.906436
EASTON Carey	16 NOV 1979	GBR GBR	24.18	52.44	0.922197
EVANS Louise	07 OCT 2000	GBR GBR	23.51	52.84	0.889856
FRASER Donna	07 NOV 1972	GBR GBR	23.05	49.79	0.925889
FROST Helen	12 MAR 1974	GBR GBR	23.93	52.4	0.913359
GUNNELL Sally	29 JUL 1966	GBR GBR	23.69	51.45	0.920894
HARTLEY Donna	01 MAY 1955	GBR GBR	22.75	51.43	0.884698
HENRY Desiree	26 AUG 1995	GBR GBR	22.46	52.27	0.859384
HYLTON Cheriece	12 DEC 1996	GBR GBR	23.23	52.88	0.878593
JAMISON Victoria Anne	19 MAY 1977	GBR GBR	24.06	52.97	0.908439
JOHN Yemi Mary	03 MAY 2003	GBR GBR	23.78	51.04	0.931818
KARAGOUNIS Helen	28 SEP 1981	GBR GBR	24.22	51.78	0.935496
KELLY Hannah	20 DEC 2000	GBR GBR	23.53	52.52	0.89604
KNIGHT Jessie	15 JUN 1994	GBR GBR	24.27	51.8	0.937066
LIVERPOOL Yasmin	15 JAN 1999	GBR GBR	23.46	51.73	0.907017
MASSEY Kelly	11 JAN 1985	GBR GBR	23.84	51.96	0.917629
MCASLAN Kirsten	01 SEP 1993	GBR GBR	23.92	52.13	0.917706
MCAULAY Carys	18 JAN 1998	GBR GBR	24.23	51.57	0.939694
MCCONNELL Lee	09 OCT 1978	GBR GBR	23.16	50.82	0.911452
MEADOWS Jennifer	17 APR 1981	GBR GBR	23.92	52.67	0.908297
MERRY Katharine	21 SEP 1974	GBR GBR	22.76	49.59	0.917927
MURPHY Catherine	21 SEP 1975	GBR GBR	23.28	51.36	0.906542
NEEF Melanie	26 MAY 1970	GBR GBR	23.35	51.18	0.912466
NEWNHAM Emily	19 MAY 2004	GBR GBR	24.01	52.15	0.920805
NICOL Gemma	27 JUL 1986	GBR GBR	24.08	52.61	0.915415
NIELSEN Laviai	13 MAR 1996	GBR GBR	23.81	50.83	0.936848
NIELSEN Lina	13 MAR 1996	GBR GBR	23.11	51.54	0.896779
OHURUOGU Christine	17 MAY 1984	GBR GBR	22.85	49.41	0.924914
OKYERE Nadine	29 NOV 1986	GBR GBR	24.13	52.26	0.92346
ONUORA Anyika	28 OCT 1984	GBR GBR	22.64	50.87	0.890112
OWUSU Lesley	21 DEC 1978	GBR GBR	23.89	52.27	0.9141
PARRY Jane	15 NOV 1964	GBR GBR	24	52.65	0.911681
PIPI Ama	26 NOV 1995	GBR GBR	22.95	50.75	0.904433
PURKISS Melanie	11 MAR 1979	GBR GBR	23.8	52.66	0.903912
SANDERS Nicola	23 JUN 1982	GBR GBR	23.89	49.65	0.962336
SCUTT Michelle	17 JUN 1960	GBR GBR	22.8	50.63	0.900652
SHAKES-DRAYTON Perri	21 DEC 1988	GBR GBR	23.27	50.5	0.921584
SOTHERTON Kelly	13 NOV 1976	GBR GBR	23.39	52.19	0.89634
STOUTE Jennifer	16 APR 1965	GBR GBR	22.73	51.53	0.882205
TURNER Jessica	08 AUG 1995	GBR GBR	24.15	52.57	0.918775
WAKE Laura	03 MAY 1991	GBR GBR	23.98	52.98	0.905247
WALL Kim	21 APR 1983	GBR GBR	23.6	52.11	0.905776
WILLIAMS Hannah	23 APR 1998	GBR GBR	23.38	51.6	0.906202
WILLIAMS Jodie	28 SEP 1993	GBR GBR	22.46	49.97	0.898939
YEARGIN Nicole	11 AUG 1997	GBR GBR	23.09	50.96	0.906201

## Sheet: 400-800
name, first name	date of birth	nation	sec 400m	sec 800m	KsA
BUNDY-DAVIES Seren	30 DEC 1994	GBRGBR	51.26	123.73	0.828578
CURBISHLEY Allison	03 JUN 1976	GBRGBR	50.71	123.3	0.822547
HODGKINSON Keely	03 MAR 2002	GBRGBR	51.76	115.77	0.894187
KEOUGH-STAINES Linda	26 DEC 1963	GBRGBR	50.98	121.82	0.836973
MADDOX Laura	13 MAY 1990	GBRGBR	52.73	123.86	0.851445
MEADOWS Jennifer	17 APR 1981	GBRGBR	52.67	117.93	0.893242
OKORO Marilyn	23 SEP 1984	GBRGBR	52.02	118.45	0.878345

## Sheet: 800-1500
name, first name	date of birth	nation	sec 800m	sec 1500m	KsA
ALLISON Joan	10 JUN 1947	GBRGBR	123.1	254.81	0.905822
ARCHER Holly	07 NOV 1993	GBRGBR	123.94	247.2	0.940079
BAILEY Shireen	27 SEP 1959	GBRGBR	118.98	242.32	0.920632
BAKER Ellie	03 JUN 1998	GBRGBR	119.52	243.95	0.918631
BAKER Lorraine	09 APR 1964	GBRGBR	119.67	251.95	0.890578
BELL Alexandra	04 NOV 1992	GBRGBR	117.66	247.06	0.892951
BELL Georgia	17 OCT 1993	GBRGBR	123.38	252.16	0.917423
BENNING Christine	30 MAR 1955	GBRGBR	121.77	241.53	0.945302
BEST Charlotte	07 MAR 1985	GBRGBR	121.5	256.57	0.887916
BOFFEY Isabelle	13 APR 2000	GBRGBR	119.3	258.39	0.865697
BRATHWAITE Elizabeth	10 APR 1985	GBRGBR	121.78	251.96	0.906245
BROWNING Charlotte	08 OCT 1987	GBRGBR	122.52	249.86	0.919415
CAFFEL Kelly	10 FEB 1979	GBRGBR	123.48	250.22	0.925286
CAHILL Christina	25 MAR 1957	GBRGBR	119.05	240.57	0.927874
CARTER Alexandra	01 APR 1980	GBRGBR	123.78	254.44	0.91215
CLITHEROE Helen	02 JAN 1974	GBRGBR	123.53	241.1	0.960675
COLE Rowena	13 JAN 1992	GBRGBR	122.88	258.07	0.892781
COLEBROOK Teena	18 DEC 1956	GBRGBR	121.65	247.69	0.920884
CROWE Amanda	21 OCT 1973	GBRGBR	121.83	250.68	0.911246
DOBRISKEY Lisa	23 DEC 1983	GBRGBR	120.14	239.5	0.940553
ENGLAND Hannah	06 MAR 1987	GBRGBR	119.66	241.89	0.927539
FAIRCHILD Jacqueline	03 MAY 1989	GBRGBR	122.09	254.43	0.899732
FENN Joanne	19 OCT 1974	GBRGBR	119.86	249.54	0.900607
FINCH Gemma	01 AUG 1997	GBRGBR	122.81	255.24	0.902166
FRASER Kirsty	27 NOV 1995	GBRGBR	123.45	258.81	0.894358
GIBSON Claire	25 DEC 1982	GBRGBR	121.34	254.3	0.894662
GIBSON Lynn	06 JUL 1969	GBRGBR	122.83	252.32	0.912755
GRIFFITHS Ann	20 AUG 1965	GBRGBR	119.81	247.59	0.907322
HENAGHAN Dianne	06 AUG 1965	GBRGBR	123.1	256.19	0.900943
HOLMES Kelly	19 APR 1970	GBRGBR	116.21	237.9	0.915905
IVES Abigail	06 FEB 2004	GBRGBR	119.92	258.94	0.868348
JACKSON Emma	07 JUN 1988	GBRGBR	119.37	245.83	0.910461
JUDD Jess	07 JAN 1995	GBRGBR	119.77	243.73	0.921383
KELLY Sarah	31 OCT 1992	GBRGBR	122.89	259.09	0.889339
KING Shaikira	14 JUL 2008	GBRGBR	123.79	259.31	0.895092
LEONARD Alison	17 MAR 1990	GBRGBR	120.08	249.59	0.902079
LYNE Rebecca	04 JUL 1982	GBRGBR	118.2	246.85	0.897812
MACDOUGALL Lynne	18 FEB 1965	GBRGBR	123.43	245.96	0.94093
MAGEEAN Ciara	12 MAR 1992	GBRGBR	123.07	244.14	0.94518
MCDONALD Katy-Ann	01 JUN 2000	GBRGBR	120.98	252.3	0.899078
MCDONALD Sarah	02 AUG 1993	GBRGBR	119.91	240.46	0.935005
MEADOWS Jennifer	17 APR 1981	GBRGBR	117.93	259.36	0.852555
MHLANGA Khahisa	26 DEC 1999	GBRGBR	120.87	252.84	0.896343
MITCHELL Jeina	21 JAN 1975	GBRGBR	123.36	254.14	0.910128
MODAHL-EDWARDS Diane	17 JUN 1966	GBRGBR	118.65	254.41	0.87445
MOORE Charlotte	04 FEB 1985	GBRGBR	119.75	253	0.887475
MORLEY Suzanne	11 OCT 1957	GBRGBR	122.79	252.79	0.910761
MUIR Laura	09 MAY 1993	GBRGBR	116.73	234.5	0.933342
MURRAY Madeleine	19 OCT 1993	GBRGBR	123.66	250.17	0.92682
MURRAY Yvonne	04 OCT 1964	GBRGBR	120.78	241.2	0.938899
NEWCOMBE Rachel	25 FEB 1967	GBRGBR	123.28	251.24	0.920037
NICHOLSON-HARTIGAN Beverley	10 JUN 1967	GBRGBR	120.39	247.98	0.91028
OGDEN Rachael	23 JUL 1979	GBRGBR	123.14	251.89	0.91662
OKORO Marilyn	23 SEP 1984	GBRGBR	118.45	251.85	0.881849
PARKINSON-OVENS Hayley	05 DEC 1975	GBRGBR	123.19	250.34	0.92267
PARRY Alison	19 JUN 1966	GBRGBR	122.47	253.26	0.906702
PARRY-TULLETT Hayley	17 FEB 1973	GBRGBR	120.49	239.95	0.941524
REEKIE Jemma	06 MAR 1998	GBRGBR	116.9	238.65	0.918448
RILEY Catherine	04 JUN 1982	GBRGBR	122.79	254.3	0.905353
ROBINSON Lynne	21 JUN 1969	GBRGBR	122.18	252.03	0.908969
ROSS Joanna	18 FEB 1981	GBRGBR	121.84	257.04	0.888772
SCOTT Susan	26 SEP 1977	GBRGBR	119.02	247	0.903492
SEGRAVE Hannah	14 APR 1995	GBRGBR	120.18	252.24	0.893346
SELMAN Jenny	09 MAR 1991	GBRGBR	120.86	248.24	0.912877
SIMPSON Jemma	10 FEB 1984	GBRGBR	118.74	246.39	0.903598
SLY Wendy	05 NOV 1959	GBRGBR	123.06	244.14	0.945103
SMITH Stacey	24 FEB 1990	GBRGBR	121.93	246.81	0.926295
SNOWDEN Katie	09 MAR 1994	GBRGBR	118	240.04	0.921721
STEWART Mary	25 FEB 1956	GBRGBR	123.11	246	0.938338
TAYLOR Celia	22 JAN 1977	GBRGBR	121.16	250.41	0.907212
TAYLOR-CAREY Sheila	12 AUG 1946	GBRGBR	123.81	244.81	0.948261
THOMAS Charlene	06 MAY 1982	GBRGBR	121.87	243.74	0.9375
TRACEY Adelle	27 MAY 1993	GBRGBR	119.5	242.55	0.923779
TWELL Stephanie	17 AUG 1989	GBRGBR	122.58	242.54	0.947627
WADE Kirsty	06 AUG 1962	GBRGBR	117.42	240.73	0.914562
WALCOTT-NOLAN Revee	06 MAR 1995	GBRGBR	121.02	246.23	0.921547
WALLACE Erin	18 MAY 2000	GBRGBR	121.16	246.29	0.922388
WEIGHTMAN Laura	01 JUL 1991	GBRGBR	121.87	240.09	0.951752
WESTLEY Abby	15 JUL 1987	GBRGBR	123.9	248.74	0.933957

## Sheet: 1500-3000
name, first name	date of birth	nation	sec 1500m	sec 3000m	KsA
ANKIER Joanna	1982-08-05	GBRGBR	259.09	546.76	0.947728
ARTER Charlotte	1991-06-18	GBRGBR	254.41	538.48	0.944919
ASTIN Sarah	22 OCT 1993	GBRGBR	258.75	536.59	0.964423
AVERY Kate	10 OCT 1991	GBRGBR	255.42	536.24	0.952633
BAKER Eleanor	11 DEC 1983	GBRGBR	257.05	550.34	0.93415
BARNES Danielle	08 OCT 1985	GBRGBR	255	564.4	0.903614
BARNES Stephanie	1988-07-28	GBRGBR	254.37	555.58	0.915692
BELL Alexandra	1992-11-04	GBRGBR	247.06	561.95	0.879295
BELL Georgia	17 OCT 1993	GBRGBR	252.16	546.63	0.922598
BENNING Christine	30 MAR 1955	GBRGBR	241.53	524.46	0.921062
BERRY Catherine	08 OCT 1975	GBRGBR	255.16	536.44	0.951309
BLEASDALE Julia	1981-09-09	GBRGBR	256.56	526.38	0.974809
BRADFORD Carole	1961-11-03	GBRGBR	254.44	546.3	0.931503
BROOKS Hannah	1988-06-25	GBRGBR	252.27	551.86	0.914254
BROWN Tina	1976-08-22	GBRGBR	256.42	550.54	0.931522
BUDD Zola	26 MAY 1966	GBRGBR	239.96	508.83	0.943183
BULL Sarah	1975-06-04	GBRGBR	252.21	558.11	0.9038
CAHILL Christina	25 MAR 1957	GBRGBR	240.57	529.89	0.908
CARTER Kathy	1959-02-24	GBRGBR	258.03	537.02	0.96097
CHAPMAN Sarah	1998-04-21	GBRGBR	258.21	557.03	0.927095
CHATTENTON Dani	1996-07-04	GBRGBR	255.35	558.64	0.914184
CLARKE Rosie	1991-11-17	GBRGBR	247.69	531.02	0.932884
CLAY Bobby	19 MAY 1997	GBRGBR	250.61	553.97	0.904778
CLITHEROE Helen	1974-01-02	GBRGBR	241.1	531.82	0.906698
COLLERAN Joanne	1972-09-01	GBRGBR	256.24	568.84	0.900921
COULSON Jessica	1990-04-18	GBRGBR	258.75	551.28	0.938724
COURTNEY-BRYANT Melissa	1993-08-30	GBRGBR	238.01	519.2	0.916834
COWARD Lilly	1996-09-10	GBRGBR	256.5	560.18	0.915777
DAINTY Gillian	1958-11-24	GBRGBR	248.7	548.96	0.906077
DAVIES Angharad	1991-11-27	GBRGBR	256.49	556.62	0.921598
DEADMAN Lauren	27 MAR 1984	GBRGBR	256.89	555.08	0.925596
DEAN Hatti	1982-02-02	GBRGBR	256.57	538.77	0.952429
DERING Jo	1969-02-07	GBRGBR	251.85	539.45	0.933729
DOBRISKEY Lisa	23 DEC 1983	GBRGBR	239.5	534.12	0.896802
DUCK Claire	1985-08-29	GBRGBR	255.27	551.26	0.926133
ELLIOTT Lucy	09 MAR 1966	GBRGBR	258.07	559.02	0.923294
FAIRCHILD Jacqueline	03 MAY 1989	GBRGBR	254.43	559.9	0.908841
FELTON Rachel	1979-06-27	GBRGBR	253.19	563	0.899432
FRY Izzy	04 MAY 2000	GBRGBR	257.07	536.93	0.957555
FULLERTON Faye	31 MAY 1984	GBRGBR	250.24	547.52	0.914085
FURNISS Jane	1960-08-23	GBRGBR	251.51	525.69	0.956876
GAULD Nicola	28 MAR 1982	GBRGBR	251.8	544.21	0.925378
GIBSON Ashley	01 MAR 1986	GBRGBR	258.72	563.03	0.919027
GIBSON Lynn	1969-07-06	GBRGBR	252.32	564.6	0.893801
GILIBRAND Kerry	1976-09-13	GBRGBR	251.8	565.08	0.891201
GILLESPIE Kathryn	1996-09-27	GBRGBR	256.29	567.66	0.90297
GORECKA Emelia	1994-01-29	GBRGBR	255.38	535.11	0.954495
GRIFFITHS Amy	22 MAR 1996	GBRGBR	249.71	556.57	0.897317
GUNNING Deborah	1965-08-31	GBRGBR	255.2	556.06	0.917887
HARGRAVE-HUTCHESON Karen	1965-09-23	GBRGBR	249.46	528.72	0.943637
HARVEY Joanne	1989-09-27	GBRGBR	257.51	553.58	0.930344
HENAGHAN Dianne	1965-08-06	GBRGBR	256.19	554.24	0.924473
HESLOP Justina	03 MAR 1979	GBRGBR	256.51	547.62	0.936818
HILL Jenna	16 OCT 1985	GBRGBR	253.24	561.93	0.901322
HOLMES Kelly	1970-04-19	GBRGBR	237.9	541.91	0.878006
HOLT Kate	1992-09-07	GBRGBR	254.36	544.82	0.93374
HOOD Sara	1982-06-09	GBRGBR	258.81	562.84	0.919657
HOSKER-THORNHILL Emily	27 OCT 1992	GBRGBR	254.4	555.37	0.916146
INGLIS Sarah	1991-08-28	GBRGBR	251.51	566.02	0.888697
INGMAN Jilly	1978-08-17	GBRGBR	259.03	552.37	0.937886
JOEL Alexa	1983-09-19	GBRGBR	258.19	555.97	0.928791
JOHNSON Rebecca	1995-02-06	GBRGBR	258.71	558.89	0.925799
JUDD Jess	1995-01-07	GBRGBR	243.73	532.73	0.915023
KEITH Megan	2002-04-23	GBRGBR	257.26	532.51	0.966217
KERSEY Gemma	1992-02-06	GBRGBR	253.54	550.48	0.92116
KIDGER Beth	16 MAR 1994	GBRGBR	254.52	546.29	0.931813
KIRK Elinor	1989-04-26	GBRGBR	255.93	552.5	0.926443
KNOWLES-JONES Harriet	1998-04-03	GBRGBR	254.95	554.86	0.918971
KRZYWICKI Tara	09 MAR 1974	GBRGBR	254.06	559.1	0.908818
MAYOCK Charlotte	11 DEC 1973	GBRGBR	259.5	565.58	0.917642
MCCOLGAN Eilish	1990-11-25	GBRGBR	240.97	511	0.943131
MCCOLGAN Liz	24 MAY 1964	GBRGBR	241.38	518.23	0.931555
MCGEORGE Sonia	1964-11-02	GBRGBR	252.16	531.33	0.949165
MCGHEE Abbey	02 MAR 1990	GBRGBR	257.49	569.5	0.904267
MCNIVEN Ella	2001-09-04	GBRGBR	255.61	569.76	0.897255
MILLARD Alexandra	31 DEC 2001	GBRGBR	251.67	542.8	0.927303
MORLEY Suzanne	11 OCT 1957	GBRGBR	252.79	536.39	0.94256
MORRIS Nicky	13 MAR 1962	GBRGBR	253.74	539.46	0.940718
MORRIS Sophie	05 DEC 1975	GBRGBR	258.02	550.44	0.937505
MOULTRIE Josephine	1990-11-19	GBRGBR	250.43	557.43	0.898516
MUIR Laura	09 MAY 1993	GBRGBR	234.5	510.53	0.918653
MURRAY Freya	1983-09-20	GBRGBR	255.85	548.97	0.932109
MURRAY Yvonne	04 OCT 1964	GBRGBR	241.2	509.02	0.947703
NESBITT Jennifer	1995-01-24	GBRGBR	253.12	539.86	0.937725
NEWPORT DAVIES Angela	21 OCT 1970	GBRGBR	252.09	548.12	0.919835
NICHOLSON-HARTIGAN Beverley	1967-06-10	GBRGBR	247.98	552.64	0.897438
NUTTALL Hannah	1997-07-07	GBRGBR	245.66	568.62	0.864057
OCKENDEN Verity	1991-08-31	GBRGBR	249.34	546.54	0.912431
PALLANT Emma	1989-06-04	GBRGBR	249.96	547.28	0.913463
PARKER Barbara	1982-11-08	GBRGBR	251.52	538.62	0.933942
PARKER-LAMB Susan	24 MAR 1970	GBRGBR	251.57	562.45	0.894551
PARKINSON Amanda	1971-07-21	GBRGBR	254.19	567.59	0.895682
PARKINSON-OVENS Hayley	05 DEC 1975	GBRGBR	250.34	554.88	0.902321
PARRY-TULLETT Hayley	1973-02-17	GBRGBR	239.95	525.39	0.913417
PAVEY Joanne	1973-09-20	GBRGBR	241.79	511.27	0.945841
PENNYCOOK Stephie	1995-09-01	GBRGBR	255.94	561.83	0.911094
PIDGEON Emily	1989-06-01	GBRGBR	253.56	546.87	0.927314
POTTER Elizabeth	27 DEC 1991	GBRGBR	258.54	555.76	0.930402
POTTER-DOYLE Juliet	24 OCT 1981	GBRGBR	258.7	550.78	0.939395
PRATT Aimee	03 OCT 1997	GBRGBR	252.52	524.15	0.963541
PURDUE Charlotte	1991-06-10	GBRGBR	259.13	551.54	0.93966
QUIRK Amelia	18 DEC 1999	GBRGBR	252.19	551.2	0.915058
RADCLIFFE Paula	17 DEC 1973	GBRGBR	245.37	502.2	0.97718
REED Kate	1982-09-28	GBRGBR	253.55	541.17	0.937044
REEKIE Jemma	06 MAR 1998	GBRGBR	238.65	564.81	0.845063
SAMUELS Amelia	09 MAY 2001	GBRGBR	259.97	569.17	0.913506
SLY Wendy	1959-11-05	GBRGBR	244.14	517.06	0.944339
SMITH Joyce	26 OCT 1937	GBRGBR	249.37	537.39	0.928078
SNOW Linzi	1987-06-08	GBRGBR	259.57	561.1	0.925218
SPARKE Jessica	26 DEC 1987	GBRGBR	255.5	548.49	0.931649
STEWART Emily	24 DEC 1991	GBRGBR	256.91	556.31	0.923622
STOCKTON Stevie	1989-08-23	GBRGBR	254.11	540.67	0.939982
STONE Philippa	1998-04-01	GBRGBR	255.98	556.48	0.919997
TAIT Sarah	26 MAR 2001	GBRGBR	257.3	563.01	0.914016
TARVER Sophie	10 MAY 1998	GBRGBR	259.23	563.08	0.920757
TASCHIMOWITZ Naomi	19 OCT 1989	GBRGBR	256.32	552.66	0.927587
THACKERY Calli	1993-01-09	GBRGBR	254.08	528.1	0.962242
THOMAS Charlene	06 MAY 1982	GBRGBR	243.74	551.07	0.884606
TURTLE Gemma	15 MAY 1986	GBRGBR	257.91	554.8	0.92974
TWELL Stephanie	1989-08-17	GBRGBR	242.54	520.98	0.931091
WAITE Lennie	1986-02-04	GBRGBR	255.33	560.88	0.910462
WALCOTT-NOLAN Revee	06 MAR 1995	GBRGBR	246.23	553.36	0.889945
WALKER Eloise	27 MAY 2001	GBRGBR	257.36	529.56	0.971977
WALSH Jennifer	1993-02-22	GBRGBR	252.96	557.4	0.907643
WARD Emma	1982-01-02	GBRGBR	253.38	567.63	0.892765
WEIGHTMAN Laura	1991-07-01	GBRGBR	240.09	506.07	0.948841
WHITCOMBE-GREEN Andrea	1971-06-08	GBRGBR	258.24	553.81	0.932594
WHITMORE Hannah	1984-02-24	GBRGBR	253.72	555.65	0.913237
WHITTLE Laura	1985-06-27	GBRGBR	252.48	530.37	0.95209
WOOTTON Katrina	1985-09-02	GBRGBR	247.94	543.87	0.911762
WRIGHT Lucy	1969-11-17	GBRGBR	259.71	556.01	0.934192
WYETH Alison	26 MAY 1964	GBRGBR	243.17	518.42	0.93812
YELLING Liz	05 DEC 1974	GBRGBR	255.01	551.04	0.925559
YORK Lisa	10 MAR 1970	GBRGBR	249.34	527.71	0.944989
YULE Penny	07 MAY 1949	GBRGBR	250.03	548.06	0.912418

## Sheet: 3000-5000
name, first name	date of birth	nation	sec 3000m	sec 5000m	KsA
ARTER Charlotte	1991-06-18	GBRGBR	538.48	930.35	0.964655
ASTIN Sarah	22 OCT 1993	GBRGBR	536.59	936.43	0.955028
AUCKLAND Rhona	11 MAY 1993	GBRGBR	569.28	927.6	1.02285
AVERY Kate	10 OCT 1991	GBRGBR	536.24	925.63	0.965541
AXFORD Kate		GBRGBR	546.02	949.79	0.958142
BAKER Eleanor	11 DEC 1983	GBRGBR	550.34	944.98	0.970638
BERRY Catherine	08 OCT 1975	GBRGBR	536.44	919.78	0.972044
BLEASDALE Julia	1981-09-09	GBRGBR	526.38	902	0.972616
BOLTZ Jill	14 OCT 1966	GBRGBR	527.36	909.98	0.965882
BOWDEN Philippa	29 MAR 1995	GBRGBR	553.24	944.54	0.976207
BUDD Zola	26 MAY 1966	GBRGBR	508.83	888.07	0.954936
BUTLER Kathy	22 OCT 1973	GBRGBR	520.97	905.51	0.958889
CHAPMAN Sarah	1998-04-21	GBRGBR	557.03	949.69	0.977565
CHATTENTON Dani	1996-07-04	GBRGBR	558.64	953.25	0.976729
CLARKE Rosie	1991-11-17	GBRGBR	531.02	919.75	0.962254
CLAYTON Emma	1988-07-16	GBRGBR	568.23	944.38	1.00283
CLITHEROE Helen	1974-01-02	GBRGBR	531.82	906.75	0.97752
COULSON Jessica	1990-04-18	GBRGBR	551.28	929.5	0.988488
COURTNEY-BRYANT Melissa	1993-08-30	GBRGBR	519.2	893.82	0.968129
DAMEN Louise	12 OCT 1982	GBRGBR	566.62	953.11	0.990827
DEADMAN Lauren	27 MAR 1984	GBRGBR	555.08	945.12	0.978853
DONNELLY Abbie	1996-09-02	GBRGBR	538.59	942.65	0.952262
DUCK Claire	1985-08-29	GBRGBR	551.26	939.68	0.977744
EDWARDS Sian	1988-11-24	GBRGBR	550.67	942.48	0.973796
ELLIOTT Lucy	09 MAR 1966	GBRGBR	559.02	934.4	0.99711
FAGAN Collette	1982-06-06	GBRGBR	555.18	949.51	0.974503
FRY Izzy	04 MAY 2000	GBRGBR	536.93	921.32	0.971306
FUDGE Paula	30 MAR 1952	GBRGBR	528.74	914.51	0.963613
FULLERTON Faye	31 MAY 1984	GBRGBR	547.52	953.69	0.956845
FURNISS Jane	1960-08-23	GBRGBR	525.69	932.34	0.939732
GILL Vicky	1980-08-21	GBRGBR	566.87	942.4	1.00253
GORECKA Emelia	1994-01-29	GBRGBR	535.11	907.45	0.982809
HARVEY Natalie Anne	1975-01-19	GBRGBR	533.63	914.08	0.972982
HESLOP Justina	03 MAR 1979	GBRGBR	547.62	949.74	0.961
HOLLAND Julie	1966-01-20	GBRGBR	542.25	931.78	0.969918
HOLT Kate	1992-09-07	GBRGBR	544.82	948.45	0.957387
HOSKER-THORNHILL Emily	27 OCT 1992	GBRGBR	555.37	946.22	0.978226
HOWARTH Lauren	1990-04-21	GBRGBR	550.32	929.26	0.987022
INGLIS Sarah	1991-08-28	GBRGBR	566.02	905.51	1.04181
JONES Caryl	1987-04-04	GBRGBR	553.6	937.03	0.984671
JUDD Jess	1995-01-07	GBRGBR	532.73	897.19	0.989627
KEITH Megan	2002-04-23	GBRGBR	532.51	896.98	0.98945
KIDGER Beth	16 MAR 1994	GBRGBR	546.29	937.47	0.971213
KIRK Elinor	1989-04-26	GBRGBR	552.5	937.65	0.982065
KNIGHTS Bethan	1995-09-28	GBRGBR	558.25	951.49	0.977852
KRZYWICKI Tara	09 MAR 1974	GBRGBR	559.1	948.01	0.982936
MARKOVC Amy-Eloise	1995-08-05	GBRGBR	520.32	896.6	0.967209
MCCOLGAN Eilish	1990-11-25	GBRGBR	511	868.55	0.980561
MCCOLGAN Liz	24 MAY 1964	GBRGBR	518.23	899.56	0.960155
MCGEORGE Sonia	1964-11-02	GBRGBR	531.33	929.04	0.953188
MILLARD Alexandra	31 DEC 2001	GBRGBR	542.8	943.41	0.958933
MUIR Laura	09 MAY 1993	GBRGBR	510.53	888.14	0.958051
MURRAY Freya	1983-09-20	GBRGBR	548.97	926.05	0.988014
MURRAY Yvonne	04 OCT 1964	GBRGBR	509.02	896.94	0.945846
NESBITT Jennifer	1995-01-24	GBRGBR	539.86	917.39	0.98079
NEWPORT DAVIES Angela	21 OCT 1970	GBRGBR	548.12	943.99	0.967736
OCKENDEN Verity	1991-08-31	GBRGBR	546.54	903.51	1.00818
PALLANT Emma	1989-06-04	GBRGBR	547.28	935.27	0.975262
PALMER Gillian	13 DEC 1980	GBRGBR	552.47	953.96	0.965222
PARKER Barbara	1982-11-08	GBRGBR	538.62	912.81	0.983447
PARKINSON Amanda	1971-07-21	GBRGBR	567.59	954.09	0.991503
PAVEY Joanne	1973-09-20	GBRGBR	511.27	879.96	0.968358
PIDGEON Emily	1989-06-01	GBRGBR	546.87	932.27	0.977667
POTTER Elizabeth	27 DEC 1991	GBRGBR	555.76	928.32	0.997788
PRATT Aimee	03 OCT 1997	GBRGBR	524.15	929.54	0.939802
PURDUE Charlotte	1991-06-10	GBRGBR	551.54	923.4	0.995488
QUIRK Amelia	18 DEC 1999	GBRGBR	551.2	943.35	0.973834
RADCLIFFE Paula	17 DEC 1973	GBRGBR	502.2	869.11	0.963054
REED Kate	1982-09-28	GBRGBR	541.17	929.1	0.970778
SLY Wendy	1959-11-05	GBRGBR	517.06	921.45	0.935229
SMALL Louise	27 MAR 1992	GBRGBR	555.47	941.94	0.982847
STEEL Gemma	1985-11-12	GBRGBR	569.28	947.21	1.00168
STOCKTON Stevie	1989-08-23	GBRGBR	540.67	941.11	0.957504
TANK Poppy	05 DEC 1997	GBRGBR	547.16	945.07	0.964937
TAYLOR Nicole	1995-01-18	GBRGBR	560.3	949.25	0.983759
THACKERY Calli	1993-01-09	GBRGBR	528.1	902.55	0.9752
THOMAS-SAMUELS Sonia	16 MAY 1979	GBRGBR	553.06	944.24	0.9762
TITTERINGTON Helen	24 OCT 1969	GBRGBR	552.93	940.14	0.980226
TOOBY Angela	24 OCT 1960	GBRGBR	527.59	913.22	0.962875
TOOBY Susan	24 OCT 1960	GBRGBR	537.17	935.4	0.957113
TURTLE Gemma	15 MAY 1986	GBRGBR	554.8	944.09	0.979426
TWELL Stephanie	1989-08-17	GBRGBR	520.98	894.08	0.971166
WALDRON Sarah	1988-02-11	GBRGBR	569.55	937.49	1.01254
WALKER Eloise	27 MAY 2001	GBRGBR	529.56	925.21	0.953946
WALKER Hannah	1991-08-09	GBRGBR	562.85	948.69	0.98882
WALLACE Andrea	1966-11-22	GBRGBR	547.49	928.63	0.982612
WALSH Jennifer	1993-02-22	GBRGBR	557.4	954.57	0.973213
WEIGHTMAN Laura	1991-07-01	GBRGBR	506.07	875.44	0.963458
WHITCOMBE-GREEN Andrea	1971-06-08	GBRGBR	553.81	932.62	0.989703
WHITMORE Hannah	1984-02-24	GBRGBR	555.65	950.48	0.974332
WHITTLE Laura	1985-06-27	GBRGBR	530.37	908.58	0.972892
WILLIAMS Bella	05 OCT 1998	GBRGBR	550.16	943.23	0.972121
WOOTTON Katrina	1985-09-02	GBRGBR	543.87	930.82	0.973819
WYETH Alison	26 MAY 1964	GBRGBR	518.42	900.37	0.959643
YELLING Hayley	1974-01-03	GBRGBR	548.64	916.44	0.997774
YELLING Liz	05 DEC 1974	GBRGBR	551.04	938.86	0.978208
YOUNG-WILKINSON Sarah	1970-01-02	GBRGBR	544.27	940.85	0.964146

## Sheet: 5000-10000
name, first name	date of birth	nation	sec 5000m	sec 10,000m	KsA
ARTER Charlotte	1991-06-18	GBRGBR	930.35	1935.71	0.961249
ASTIN Sarah	22 OCT 1993	GBRGBR	936.43	2009.39	0.932054
AUCKLAND Rhona	11 MAY 1993	GBRGBR	927.6	1942.79	0.954915
AVERY Kate	10 OCT 1991	GBRGBR	925.63	1901.44	0.973609
BAKER Eleanor	11 DEC 1983	GBRGBR	944.98	1993.32	0.948147
BLEASDALE Julia	1981-09-09	GBRGBR	902	1855.63	0.972177
BOLTZ Jill	14 OCT 1966	GBRGBR	909.98	1867.88	0.974345
BOWDEN Philippa	29 MAR 1995	GBRGBR	944.54	1953.1	0.967221
BUTLER Kathy	22 OCT 1973	GBRGBR	905.51	1896.9	0.954726
CLAYTON Emma	1988-07-16	GBRGBR	944.38	2008.33	0.940463
CLITHEROE Helen	1974-01-02	GBRGBR	906.75	1931.29	0.93901
COULSON Jessica	1990-04-18	GBRGBR	929.5	1961.59	0.947701
DAGNE Birhan	1978-04-08	GBRGBR	936.35	1950.04	0.960339
DAMEN Louise	12 OCT 1982	GBRGBR	953.11	2008.61	0.949024
DEADMAN Lauren	27 MAR 1984	GBRGBR	945.12	1985.55	0.951998
DIXON Alyson	1978-09-24	GBRGBR	953.46	1975.36	0.965353
DONNELLY Abbie	1996-09-02	GBRGBR	942.65	1930.16	0.976758
DUCK Claire	1985-08-29	GBRGBR	939.68	1971.38	0.953322
ELLIOTT Lucy	09 MAR 1966	GBRGBR	934.4	1992.08	0.938115
FAGAN Collette	1982-06-06	GBRGBR	949.51	1980.31	0.958951
FURNISS Jane	1960-08-23	GBRGBR	932.34	1966.07	0.94843
GILL Vicky	1980-08-21	GBRGBR	942.4	1961.17	0.961059
GORECKA Emelia	1994-01-29	GBRGBR	907.45	1959.37	0.926267
GRAY Natalie	1988-02-17	GBRGBR	952.73	2000.31	0.952582
HAINING Hayley	06 MAR 1972	GBRGBR	946.05	1967.96	0.961452
HARRISON Samantha	1995-02-01	GBRGBR	922.29	1871.4	0.985668
HARVEY Natalie Anne	1975-01-19	GBRGBR	914.08	1934.01	0.945269
HOLLAND Julie	1966-01-20	GBRGBR	931.78	1967.78	0.947037
HULLEY Angela	1962-02-08	GBRGBR	941.11	1962.84	0.958927
INGLIS Sarah	1991-08-28	GBRGBR	905.51	1899.6	0.953369
JONES Caryl	1987-04-04	GBRGBR	937.03	1972.53	0.950079
JUDD Jess	1995-01-07	GBRGBR	897.19	1835.93	0.977368
KEARNEY Emily	1995-11-10	GBRGBR	939.65	1989.65	0.944538
KIDGER Beth	16 MAR 1994	GBRGBR	937.47	1974.75	0.949457
KIRK Elinor	1989-04-26	GBRGBR	937.65	1937.05	0.968122
KRZYWICKI Tara	09 MAR 1974	GBRGBR	948.01	1984.55	0.95539
MACLENNAN Mhairi	26 MAR 1995	GBRGBR	951.78	1978.42	0.962162
MARKOVC Amy-Eloise	1995-08-05	GBRGBR	896.6	1877.81	0.954942
MARTIN Jessica	01 OCT 1992	GBRGBR	924.02	1895.92	0.974746
MCCOLGAN Eilish	1990-11-25	GBRGBR	868.55	1800.86	0.964595
MCCOLGAN Liz	24 MAY 1964	GBRGBR	899.56	1857.07	0.968795
MURRAY Freya	1983-09-20	GBRGBR	926.05	1943.44	0.953001
MURRAY Yvonne	04 OCT 1964	GBRGBR	896.94	1916.97	0.935789
NESBITT Jennifer	1995-01-24	GBRGBR	917.39	1958.45	0.936853
OCKENDEN Verity	1991-08-31	GBRGBR	903.51	1903.7	0.949215
PALMER Gillian	13 DEC 1980	GBRGBR	953.96	1989.7	0.958898
PAVEY Joanne	1973-09-20	GBRGBR	879.96	1853.2	0.949665
POTTER Elizabeth	27 DEC 1991	GBRGBR	928.32	1923.45	0.965266
PURDUE Charlotte	1991-06-10	GBRGBR	923.4	1923.55	0.9601
RADCLIFFE Paula	17 DEC 1973	GBRGBR	869.11	1801.09	0.965093
REED Kate	1982-09-28	GBRGBR	929.1	1895.77	0.980182
ROBINSON Debbie	1968-01-31	GBRGBR	949.68	1999.67	0.949837
SLY Wendy	1959-11-05	GBRGBR	921.45	1913.36	0.963175
SMALL Louise	27 MAR 1992	GBRGBR	941.94	1954.73	0.963755
STEEL Gemma	1985-11-12	GBRGBR	947.21	1954.81	0.969107
STOCKTON Stevie	1989-08-23	GBRGBR	941.11	1955.26	0.962644
TANK Poppy	05 DEC 1997	GBRGBR	945.07	1970.57	0.959184
TAYLOR Charlotte	1994-01-17	GBRGBR	929.07	1931.8	0.96187
THOMAS-SAMUELS Sonia	16 MAY 1979	GBRGBR	944.24	1959.36	0.963825
TITTERINGTON Helen	24 OCT 1969	GBRGBR	940.14	1956.09	0.961244
TOOBY Angela	24 OCT 1960	GBRGBR	913.22	1915.3	0.953605
TOOBY Susan	24 OCT 1960	GBRGBR	935.4	1940.95	0.963858
TWELL Stephanie	1989-08-17	GBRGBR	894.08	1868.13	0.957192
WALDRON Sarah	1988-02-11	GBRGBR	937.49	1956.07	0.958544
WALKER Hannah	1991-08-09	GBRGBR	948.69	1976.9	0.959775
WALLACE Andrea	1966-11-22	GBRGBR	928.63	1941.61	0.956557
WILLIAMS Bella	05 OCT 1998	GBRGBR	943.23	1997.07	0.944614
WOOTTON Katrina	1985-09-02	GBRGBR	930.82	1947.47	0.955927
WRIGHT Alice	1994-11-03	GBRGBR	945.51	1916.52	0.986695
YAMAUCHI Mara	1973-08-13	GBRGBR	928.58	1909.4	0.972641
YELLING Hayley	1974-01-03	GBRGBR	916.44	1905.14	0.962071
YELLING Liz	05 DEC 1974	GBRGBR	938.86	1918.39	0.9788
YOUNG-WILKINSON Sarah	1970-01-02	GBRGBR	940.85	1954.07	0.962964
