# Supplementary material for: Sex-specific characteristics of special endurance and performance potential in female runners
Source: BMC Res Notes. 2025 Apr 26;18:196. doi: 10.1186/s13104-025-07256-6 (PMC12032771; doi:10.1186/s13104-025-07256-6)
Supplement: Supplementary file 4 — Supplementary Material 4 [file 13104_2025_7256_MOESM4_ESM.xlsx]

## Sheet: Tabelle1
name	first name	age	sec 800m	placement 800m	sec 1500m	placement 1500m	KsA value	year
Schacht	Elisabeth	22	120.13	2	250.82	3	0.898029	1980
Friedmann	Birgit	20	121.8	5	246.64	2	0.925945	1980
Büngener	Simone	18	122.21	6	262.4	12	0.873261	1980
Kraus	Brigitte	24	122.7	7	246.62	1	0.932862	1980
Steiert	Vera	22	124.9	10	253.07	4	0.925386	1980
Weiß	Sabine	23	125	11	258.67	7	0.906077	1980
Büngener	Bettina	21	125.64	16	261.9	11	0.899485	1980
Krott	Martina	22	127.4	17	263.7	15	0.905859	1980
Schmidt	Birgit	17	128.06	21	268.31	29	0.894907	1980
Malzbender	Switgart	18	128.3	23	265	24	0.907783	1980
Böker	Steffi	23	128.76	25	264.37	20	0.913209	1980
Klinger	Margrit	20	119.2	1	253.9	5	0.880268	1980
Theuss	Bianca	20	125.61	15	259.89	9	0.906225	1980
Klinger	Margrit	21	119.54	1	249.82	6	0.897196	1981
Schacht	Elisabeth	23	120.38	2	247.11	2	0.913409	1981
Krott	Martina	23	121.34	3	249.17	4	0.913081	1981
Kraus	Birgit	25	121.69	4	245.47	1	0.929518	1981
Friedmann	Birgit	21	122.16	6	248.25	3	0.922659	1981
Gerdes	Roswitha	20	123.5	10	257.9	12	0.897877	1981
Theuss	Bianca	21	126.2	11	256.21	10	0.923559	1981
Böker	Steffi	24	126.81	14	260.25	14	0.913617	1981
Weiß	Sabine	24	127.17	15	261.4	15	0.91218	1981
Büngener	Bettina	22	127.45	17	262.58	18	0.91008	1981
Petersen	Birgit	19	127.47	18	263.13	20	0.90832	1981
Schulz	Gudrun	20	127.53	19	256.13	9	0.933584	1981
Franzis	Elisabeth	19	127.64	20	260.16	13	0.919915	1981
Steiert	Vera	23	127.85	22	249.32	5	0.96149	1981
Przybyla	Anne	18	128.2	25	266.22	28	0.902919	1981
Krott	Martina	24	120.54	3	248.19	3	0.910643	1982
Büngener	Simone	20	121.69	4	255.62	6	0.892609	1982
Gerdes	Roswitha	21	121.79	5	252.12	4	0.905744	1982
Friedmann	Birgit	22	122.81	6	245.9	1	0.936432	1982
Schmidt	Birgit	19	125.88	12	264.99	25	0.890694	198
Schacht	Elisabeth	24	125.92	13	255.2	5	0.925157	1982
Weiß	Sabine	25	127.4	17	256.27	7	0.932122	1982
Franzis	Elisabeth	20	127.5	19	259.74	10	0.920392	1982
Deselaers	Ines	19	127.7	21	259.92	12	0.921197	1982
Teske	Charlotte	33	128.4	25	258.7	8	0.930615	1982
Engel	Anja	16	128.95	30	266.26	29	0.908064	1982
Klinger	Margrit	23	118.01	1	242.66	2	0.911847	1983
Kraus	Brigitte	27	119.28	2	242.42	1	0.922572	1983
Krott	Martina	25	120.86	4	247	3	0.91746	1983
Bens	Monika	17	121.29	5	264.1	25	0.861108	1983
Schultheiß	Margit	29	122.29	6	265.6	29	0.863305	1983
Gerdes	Roswitha	20	123.12	9	250.41	4	0.921888	1983
Schmidt	Birgit	20	124.08	11	253.23	8	0.91873	1983
Wulsch	Sigrid	30	125.12	14	258.21	11	0.908563	1983
Michallek	Vera	25	125.27	15	251.91	5	0.932401	1983
Deselaers	Ines	20	126.01	17	262.73	20	0.899283	1983
Heldt	Ursula	27	126.07	18	261	15	0.905675	1983
Jahnsen	Frieda	18	126.4	20	259.7	12	0.912591	1983
Wölm	Christiane	18	126.47	21	257.53	10	0.920791	1983
Franzis	Elisabeth	21	127.07	22	252.7	6	0.942842	1983
Böker	Steffi	26	128.4	29	259.8	13	0.926674	1983
Gerdes	Roswitha	21	118.88	1	244.41	1	0.911992	1984
Klinger	Margrit	24	120	2	245.5	2	0.916497	1984
Bens	Monika	18	122.45	3	259.25	12	0.885608	1984
Van Dam	Martin	26	122.6	4	254.3	7	0.903952	1984
Kleinbrahm	Petra	25	122.62	5	264.46	20	0.869366	1984
Michallek	Vera	26	122.9	6	246.25	4	0.935787	1984
Kraus	Brigitte	28	122.93	7	246	3	0.936966	1984
Schultheiß	Margit	30	123.14	8	262.1	15	0.880914	1984
Schmidt	Birgit	21	123.64	10	250.38	5	0.925893	1984
Heldt	Ursula	28	124.74	12	264.91	22	0.882894	1984
Deselaers	Ines	21	125.49	14	251.47	6	0.935673	1984
Brückner	Brigitte	28	125.67	15	263.8	19	0.893219	1984
Allmandinger	Margret	26	126	17	266.88	30	0.885229	1984
Borgschulze	Claudia	20	127.05	21	258.23	10	0.922506	1984
Jahnsen	Frieda	19	127.05	22	260.07	13	0.915979	1984
Wulsch	Sigrid	31	127.54	24	255.02	8	0.937721	1984
Merten	Silvia	17	127.63	25	264.82	21	0.903656	1984
Becker	Martina	17	127.7	26	265.81	25	0.900784	1984
Schlichterle	Susann	23	127.9	30	258.51	11	0.927672	1984
Klinger	Margrit	25	117.58	1	257.3	5	0.856831	1985
Kraus	Brigitte	29	120.77	2	248.09	1	0.912748	1985
Schmidt	Birgit	22	122.4	4	252.32	2	0.909559	1985
Allmandinger	Margret	27	123	7	257.91	7	0.894207	1985
Von Dam	Martina	27	124.66	13	262.2	22	0.891447	1985
Büngener	Bettina	26	124.87	15	258.47	8	0.905835	1985
Wulsch	Sigrid	32	125.58	17	256.93	4	0.916446	1985
Deselaers	Ines	22	125.9	18	263.37	25	0.896315	1985
Weiß	Sabine	28	126.05	19	259.21	11	0.911785	1985
Borgschulze	Claudia	21	126.25	21	254.88	3	0.928746	1985
Merten	Silvia	18	126.45	24	257.75	6	0.919859	1985
Schenk	Annette	18	127.19	26	259.85	13	0.917765	1985
Winkelmann	Antje	20	127.55	30	258.74	9	0.924311	1985
Schmidt	Birgit	23	121.63	3	248.19	3	0.918878	1986
Allmandinger	Margret	28	124.5	7	257.56	12	0.906342	1986
Michallek	Vera	28	124.64	9	244.29	1	0.95665	1986
Coqui	Eva	28	124.8	10	261.04	18	0.896414	1986
Eckhardt	Uta	19	125.56	14	255.07	9	0.922982	1986
Deselaers	Ines	23	125.94	18	252.13	5	0.93657	1986
Borgschulze	Claudia	24	126.15	19	253.94	7	0.931445	1986
Neuhaus	Beatrix	23	126.9	23	253.32	6	0.939276	1986
Kraus	Brigitte	31	119.59	1	245.23	1	0.914371	1987
Klinger	Margrit	27	119.92	2	251.75	4	0.893148	1987
Klöpfel	Birgit	26	123.58	9	262.73	18	0.881942	1987
Michallek	Vera	29	124.21	12	245.71	2	0.94784	1987
Allmandinger	Margret	29	124.56	13	255.2	6	0.915165	1987
Borgschulze	Claudia	23	125.21	15	249.64	3	0.940429	1987
Haak	Ute	21	125.99	18	259.98	12	0.908652	1987
Eckhardt	Uta	20	126.15	19	260.09	13	0.909421	1987
Vetter	Heidrun	26	126.25	20	255.82	7	0.925333	1987
Winkelmann	Antje	22	128	28	256.09	8	0.937171	1987
Kunkel	Sabine	23	128.55	30	255.07	5	0.944961	1987
Klinger	Margrit	28	120.93	4	246.59	2	0.919517	1988
Bartels	Astrid	25	122.96	5	257.61	7	0.894957	1988
Michallek	Vera	30	123.94	7	246.18	1	0.943974	1988
Behrens	Ingrid	27	124.51	9	259.3	12	0.900333	1988
Tüshaus	Ursula	27	124.84	11	260.13	14	0.899839	1988
Allmandinger	Margret	30	126.38	16	259.27	11	0.91396	1988
Gutwein	Beate	28	126.6	17	264.83	29	0.89633	1988
Eckhardt	Uta	21	127.4	22	259.06	10	0.922084	1988
Dick	Andrea	26	127.94	27	264.53	28	0.906844	1988
Schwarzbauer	Gabriele	20	128.32	30	260.76	16	0.922688	1988
Klinger	Margrit	29	121.8	3	261.46	18	0.873461	1989
Bartels	Astrid	26	124.04	6	260.4	15	0.893145	1989
Behrens	Ingrid	28	124.1	7	256.44	7	0.907376	1989
Marquardt	Rita	22	124.34	8	252.76	1	0.922367	1989
Kraus	Brigitte	33	124.64	10	253.39	2	0.922294	1989
Tüshaus	Ursula	28	125.2	13	262.2	19	0.895309	1989
Schmidt	Birgit	26	125.59	15	256.81	9	0.916947	1989
Haak	Ute	23	125.5	16	257.81	11	0.912736	1989
Lipfert	Anke	23	126.73	18	262.9	22	0.903837	1989
Borgschulze	Claudia	25	127.22	20	255.49	5	0.933647	1989
Wiethake	Astrid	27	127.3	21	262.86	21	0.90804	1989
Schwarzbauer	Gabriele	21	127.51	22	253.55	3	0.942935	1989
Kunkel	Sabine	25	127.97	25	256.35	6	0.936001	1989
Lesch	Gabriele	26	119.85	1	254.45	7	0.883155	1990
Hering	Ingrid	29	123.36	5	256.66	9	0.901192	1990
Marquardt	Rita	23	125.26	8	251.67	3	0.933216	1900
Horak	Birgit	27	126.13	11	253.25	5	0.933835	1990
Haak	Ute	24	126.4	12	257.83	12	0.91921	1990
Schwarzbauer	Gabriele	22	126.57	13	251.48	2	0.943688	1990
Kowald	Katja	19	127.12	17	264.43	21	0.901373	1990
Michallek	Vera	32	127.69	19	251.38	1	0.952418	1990
Bachmann	Ina	25	127.72	20	254.83	8	0.939744	1990
Bartels	Astrid	27	127.75	21	264.54	22	0.905463	1990
Kratz	Astrid	28	128.02	22	266.76	28	0.899826	1990
Metzner	Claudia	24	128.43	26	251.99	4	0.955618	1990
Stief	Christine	19	128.81	29	261.33	17	0.924191	1990
Lesch	Gabriele	27	119.24	2	257.33	13	0.868826	1991
Kießling	Ellen	23	120.72	5	244.75	1	0.924821	1991
Mai	Yvonne	26	121.15	6	246.09	2	0.923062	1991
Hering	Ingrid	30	122.51	8	256.81	11	0.89446	1991
Oehme	Heike	28	123.35	11	254.64	7	0.908268	1991
Kallensee	Steffi	22	124.57	12	254.59	6	0.917431	1991
Kovacs	Kati	18	125.11	13	262.2	26	0.894665	1991
Marquardt	Rita	24	125.74	14	254.36	5	0.926885	1991
Weidner	Simone	22	125.93	17	258.1	14	0.914834	1991
Hartmann	Karen	21	127.1	21	260.58	19	0.914546	1991
Metzner	Claudia	25	127.56	24	255.37	8	0.936582	1991
Michallek	Vera	33	127.68	25	253.73	4	0.943523	1991
Horak	Brigitte	27	127.8	26	259.2	16	0.924479	1991
Borgschulze	Claudia	27	128.09	27	256.06	10	0.937939	1991
Haak	Ute	25	128.22	28	260.52	18	0.922818	1991
Lieske	Monika	25	128.3	30	261.21	23	0.920954	1991
Lesch	Gabriele	28	120.38	4	255.42	10	0.883692	1992
Kießling	Ellen	24	123.17	9	250.19	3	0.923073	1992
Hering	Ingrid	31	123.42	10	252.46	5	0.91663	1992
Kovacs	Kati	19	123.81	11	263.72	25	0.880266	1992
Laskies	Anke	25	124.34	13	259.98	18	0.896752	1992
DaFonseca-Wollheim	Kristina	20	125.61	14	254.57	7	0.925163	1992
Wüstenhagen	Carmen	19	125.75	15	255.74	12	0.921957	1992
Hartmann	Karen	22	127.09	21	255.87	13	0.931308	1992
Beggerow	Antje	19	127.72	26	260.91	22	0.917845	1992
Oehme	Heike	29	128.09	28	255.73	11	0.93915	1992
Borgschulze	Claudia	28	128.18	29	252.01	4	0.953682	1992
Bachmann	Ina	28	126.84	20	260.44	20	0.913166	1992
Bruns	Anne	19	124.49	7	260.02	17	0.897695	1993
DaFonseca-Wollheim	Kristina	21	124.85	8	249.85	1	0.936937	1993
Kießling	Ellen	25	125.8	12	253.58	5	0.93018	1993
Kowald	Katja	22	126.21	15	266.01	28	0.889605	1993
Beggerow	Antje	20	126.56	18	251.98	3	0.941741	1993
Wüstenhagen	Carmen	20	127.03	21	256.07	7	0.930141	1993
Leist	Sabine	27	127.9	28	257.52	8	0.931238	1993
Weidner	Simone	25	121.19	2	252.09	2	0.901389	1994
Kießling	Ellen	26	123.52	4	247.83	1	0.934512	1994
Bruns	Anne	20	123.85	5	256.02	6	0.907034	1994
Beggerow	Antje	21	126.52	11	253.32	4	0.936464	1994
Seeger	Manuela	18	127.96	14	262.64	17	0.913513	1994
Friedmann	Ursula	23	128.04	16	265.63	24	0.903795	1994
Leist	Sabine	28	129.48	25	256.41	9	0.946823	1994
Buchleitner	Ellen	27	122.58	3	253.97	6	0.904979	1995
Bruns	Anne	21	122.62	4	249.12	2	0.922899	1995
Wüstenhagen	Carmen	22	122.84	5	249.77	3	0.922148	1995
DaFonseca-Wollheim	Kristina	23	124.65	9	246.54	1	0.947995	1995
Friedmann	Ursula	24	125.11	10	250.81	4	0.935295	1995
Kallensee	Steffi	26	126.55	16	257.99	9	0.91973	1995
Knoke	Alexandra	18	128.4	27	261.43	12	0.920897	1995
Wüstenhagen	Carmen	23	121.53	2	247.86	2	0.919345	1996
Kühnemund	Sylvia	22	122.69	4	247.25	1	0.93041	1996
Teichmann	Yvonne	19	122.98	7	257.05	8	0.897053	1996
Hartlieb	Marlies	33	123.3	8	266.45	28	0.867658	1996
DaFonseca-Wollheim	Kristina	24	123.84	10	247.87	3	0.936781	1996
Friedmann	Ursula	25	124.06	11	254.92	7	0.912492	1996
Hartmann	Karen	26	124.66	12	249.45	4	0.937011	1996
Trottnow	Ann-Kristin	20	124.69	13	258.37	10	0.90488	1996
Kallensee	Steffi	27	124.8	14	252.9	6	0.925267	1996
Bröger	Katrin	26	125.83	16	265.11	25	0.889937	1996
Walter	Doreen	20	126.96	24	262.61	18	0.906477	1996
Klein-Arndt	Melanie	21	127.07	25	262.62	19	0.907228	1996
DaFonseca-Wollheim	Kristina	25	120.86	2	244.86	1	0.925478	1997
Schimmer	Norma	27	122.17	3	256.32	9	0.893683	1997
Wüstenhagen	Carmen	24	122.31	4	248.88	3	0.921453	1997
Kallensee	Steffi	28	122.34	5	252.27	7	0.909294	1997
Hartlieb	Marlies	34	123.08	7	259.62	12	0.888895	1997
Kühnemund	Sylvia	23	123.72	9	247.49	2	0.937311	1997
Terheiden	Kristina	23	124.42	10	260.32	13	0.896157	1997
Zaituc	Luminita	29	125.74	16	249.41	4	0.945281	1997
Hartmann	Karen	27	126.05	17	260.61	14	0.906887	1997
Bruns	Anne	23	126.43	18	249.98	5	0.948301	1997
Klein-Arndt	Melanie	22	126.44	19	261.96	16	0.905005	1997
Friedmann	Ursula	26	126.44	20	252.18	6	0.940102	1997
Walter	Doreen	21	127.68	23	257.48	11	0.929781	1997
Frantz	Heike	26	128.13	25	254.86	8	0.94265	1997
Wüstenhagen	Carmen	25	122.31	4	258.22	4	0.888123	1998
Hartlieb	Marlies	35	122.37	5	257.03	7	0.892673	1998
DaFonseca-Wollheim	Kristina	26	122.89	8	241.42	1	0.954431	1998
Bruns	Anne	24	123.44	10	249.63	5	0.927172	1998
Zaituc	Luminita	30	124.43	14	246.33	3	0.947129	1998
Friedmann	Ursula	27	124.96	17	259.47	10	0.902995	1998
Weiss	Annette	30	127.02	21	267.19	26	0.89136	1998
Schimmer	Norma	28	127.65	25	263.63	15	0.907878	1998
Schwefer	Vanessa	19	127.89	27	264.07	16	0.908069	1998
Wölpert	Anette	23	128.17	30	265.85	22	0.903964	1998
Wüstenhagen	Carmen	26	121.71	4	247.92	3	0.920483	1999
Teichmann	Yvonne	22	122.58	6	260.67	19	0.881718	1999
Bruns	Anne	25	123.06	7	250.91	6	0.919603	1999
Friedrich	Kathleen	22	123.16	8	251.61	7	0.917789	1999
Klein-Arndt	Melanie	24	124.3	11	256.25	12	0.909512	1999
Zaituc	Luminita	31	126.21	17	248.17	4	0.953555	1999
Trost	Eva	31	126.42	18	262.47	21	0.903103	1999
Wölpert	Anette	24	126.65	19	257.61	16	0.921815	1999
Lenske	Gerlinde	20	126.66	20	257.33	14	0.922891	1999
Hartlieb	Marlies	36	126.91	21	257.42	15	0.924389	1999
DaFonseca-Wollheim	Kristina	28	121.13	4	245.07	1	0.926751	2000
Werner	Kerstin	18	124.86	8	258.12	9	0.906991	2000
Zaituc	Luminita	32	125.03	9	249.08	5	0.941189	2000
Bruns	Anne	26	125.14	10	257.44	8	0.911426	2000
Wüstenhagen	Carmen	27	126.49	14	251.14	7	0.944369	2000
Hoffmann	Jeanette	21	126.91	17	259.41	10	0.917298	2000
Wölpert	Anette	25	127.38	21	261.5	17	0.913337	2000
Frantz	Heike	29	129.49	30	261.25	14	0.929354	2000
Teichmann	Yvonne	24	118.62	1	251.15	4	0.885576	2001
Friedrich	Kathleen	24	122.64	3	244.27	1	0.941376	2001
Gradzki	Monika	22	123.03	5	266.11	25	0.866864	2001
DaFonseca-Wollheim	Kristina	29	123.05	6	246.71	3	0.935182	2001
Werner	Kerstin	19	123.49	7	257.62	9	0.89878	2001
Goldfuß	Janina	18	125.75	12	266.68	27	0.884135	2001
Becker	Juliane	19	126.16	14	262.84	15	0.899977	2001
Wölpert	Anette	26	127.64	21	262.64	12	0.911228	2001
Friedrich	Kathleen	25	121.79	4	246.99	1	0.924557	2002
Gradzki	Monika	23	122.52	5	260.63	8	0.881422	2002
Sonntag	Kathrin	22	125.83	10	262.06	14	0.900295	2002
Schulz	Melanie	23	127.3	16	252.61	2	0.944885	2002
Gradzki	Monika	24	120.96	3	256.97	5	0.882593	2003
Teichmann	Iyvonne	26	121.77	4	255.97	3	0.891975	2003
Friedrich	Kathleen	26	122.88	5	255.24	2	0.90268	2003
Beutelspacher	Simone	29	125.35	10	266.44	20	0.882117	2003
Rüdiger	Carmen	30	127.24	13	260.19	9	0.916926	2003
General	Bente	22	127.32	14	267.49	22	0.892463	2003
Bühler	Sigrid	24	127.44	16	259.94	8	0.919251	2003
Janssen	Saskia	18	128.53	22	264.37	15	0.911578	2003
Beck	Annette	23	128.76	23	265.99	18	0.907647	2003
Wölpert	Anette	28	128.78	24	267.46	21	0.902799	2003
Möldner	Antje	19	128.88	25	258.92	7	0.9333	2003
Marxen	Kerstin	18	129.25	29	270.27	29	0.896673	2003
Pogorzelski	Daniela	22	129.42	30	265.7	17	0.913295	2003
Goldfuß	Janina	21	121.89	3	258.09	6	0.88552	2004
Friedrich	Kathleen	27	122.25	4	246.33	1	0.930535	2004
Rüdiger	Carmen	31	123.54	6	251.98	3	0.919269	2004
Beutelspacher	Simone	30	123.79	7	255.93	5	0.906913	2004
Möldner	Antje	20	126.45	14	254.27	4	0.932449	2004
Thieke	Stephanie	18	126.76	15	258.42	7	0.919724	2004
Marxen	Kerstin	21	127.21	16	265.64	12	0.897902	2004
Bühler	Sigrid	25	127.69	18	265.01	10	0.903433	2004
Thier	Sylvia	30	129.04	25	269.84	26	0.896642	2004
Werner	Kerstin	22	129.25	29	262.87	8	0.921915	2004
Friedrich	Kathleen	28	121.45	2	248.88	2	0.914974	2005
Möldner	Antje	21	124.34	6	248.81	1	0.93701	2005
Trauth	Katrin	21	124.27	7	255.69	4	0.911284	2005
Werner	Kerstin	23	125.44	9	256.43	5	0.917209	2005
Horna	Annett	18	125.45	10	264.03	9	0.890879	2005
Becker	Juliane	23	126.22	13	261.76	6	0.90412	2005
Beutelspacher	Simone	30	127.62	19	261.77	7	0.914114	2005
Marxen	Kerstin	20	128.07	21	265.61	11	0.904075	2005
Janssen	Saskia	20	129.39	28	266.52	14	0.910274	2005
Goldfuß	Janine	23	123.33	2	259.02	4	0.892764	2006
Werner	Kerstin	24	123.37	3	255.85	2	0.904119	2006
Horna	Annett	19	123.93	4	260.08	5	0.893451	2006
Schulz	Claudia	33	123.94	5	267.73	20	0.867992	2006
Möldner	Antje	22	126.41	11	251.23	1	0.943433	2006
Becker	Juliane	24	126.84	13	260.57	6	0.912711	2006
Badane	Sena	16	126.91	14	265.46	12	0.896392	2006
Krebs	Denise	19	127.68	16	258.35	3	0.92665	2006
Marxen	Kerstin	21	128.24	19	263.87	7	0.911244	2006
Werner	Kerstin	25	121.86	2	257.86	4	0.886091	2007
Horna	Annett	20	124.91	5	265.74	14	0.881336	2007
Badane	Sena	17	126.16	12	263.92	12	0.896294	2007
Schulz	Claudia	34	126.39	13	265.95	16	0.891074	2007
Splinter	Katharina	23	127.77	16	265.17	13	0.903453	2007
Rosenplänter	Katja	26	128.11	19	260.96	7	0.920472	2007
Börner	Julia	17	128.22	20	270.61	30	0.88841	2007
Sujew	Elina	17	128.49	23	270.48	29	0.890708	2007
Lange	Julia	22	128.33	24	269.8	26	0.891841	2007
Marxen	Kerstin	22	128.98	25	261.86	8	0.923537	2007
Zeidler	Jessica	16	129.37	28	268.85	25	0.902246	2007
Krebs	Denise	20	129.57	29	258.88	5	0.938442	2007
Fischer	Ines	19	129.71	30	267.77	18	0.908265	2007
Schadt	Kristina	21	128.31	21	266	17	0.904441	2007
Gradzki	Monika	29	120.51	1	253.83	2	0.890187	2008
Hartmann	Jana	27	122.53	2	265.09	17	0.866663	2008
Trauth	Kathrin	24	124.11	4	258.46	4	0.900357	2008
Goldfuß	Janina	25	124.45	5	263.5	13	0.885555	2008
Horna	Annett	21	124.69	6	265.3	21	0.881243	2008
Kesselring	Anne	19	125.41	9	262.82	10	0.894695	2008
Sussmann	Jana	18	125.91	11	259.75	6	0.908879	2008
Krebs	Denise	21	126.98	15	257.41	3	0.924935	2008
Schadt	Kristina	22	127.7	20	264.58	16	0.904972	2008
Badane	Sena	18	127.76	21	265.2	20	0.903281	2008
Strausa	Agata	19	128.34	22	264.73	17	0.908992	2008
Sujew	Elina	18	128.99	26	267.84	26	0.902988	2008
Bühler	Sigrid	29	129.13	29	262.94	11	0.920814	2008
Goldfuß	Janina	26	122.13	2	262.12	15	0.873622	2009
Harrer	Corinna	19	124.14	6	255.16	3	0.912222	2009
Biedermann	Sarah	18	125.13	8	260.97	12	0.899026	2009
Marxen	Kerstin	24	125.29	9	257.09	6	0.913761	2009
Sujew	Diana	19	125.7	11	259.68	7	0.907607	2009
Kesselring	Anne	20	125.84	12	259.74	8	0.908408	2009
Räker	Mira	22	126.6	14	264.87	20	0.896194	2009
Strausa	Agata	20	127.41	18	256.31	5	0.93205	2009
Danner	Christiane	21	127.64	20	260.82	11	0.917587	2009
Krebs	Denise	22	127.66	21	253.51	1	0.944194	2009
Sujew	Elina	19	127.72	22	256.2	4	0.934719	2009
Restle	Simret	25	127.91	23	260.03	9	0.922321	2009
Bachmann	Sabine	26	128.3	26	267.04	26	0.900848	2009
Horna	Annett	23	122.77	3	263.29	14	0.874297	2010
Harrer	Corinna	19	124.28	5	259.1	7	0.899363	2010
Kesselring	Anne	21	124.36	6	256.25	3	0.909951	2010
Krebs	Denise	23	124.4	7	251.62	1	0.926993	2010
Sujew	Diana	20	124.56	8	253.69	2	0.920612	2010
Strausa	Agata	21	124.59	9	256.37	4	0.911207	2010
Krebs	Aline	22	125.15	12	268.43	25	0.87418	2010
Sujew	Elina	20	126.42	16	257.83	5	0.919356	2010
Janssen	Saskia	25	126.77	19	259.75	9	0.915087	2010
Krause	Gesa-Felicitas	18	127.42	22	260.23	10	0.918082	2010
Harrer	Corinna	20	121.85	2	248.63	2	0.918911	2011
Kesselring	Anne	22	122.15	3	256.55	6	0.892735	2011
Horna	Annett	24	122.29	4	253.6	5	0.904155	2011
Sujew	Diana	21	123.4	6	249.13	3	0.928732	2011
Krebs	Denise	24	123.69	7	247.7	1	0.936289	2011
Merl	Monika	32	123.71	8	257.68	8	0.900172	2011
Sujew	Elina	21	124.1	11	250.8	4	0.927781	2011
Gess	Christine	17	124.77	12	268.76	27	0.870456	2011
Krause	Gesa-Felicitas	19	125.25	13	258.54	10	0.908346	2011
Kock	Maren	21	127.43	18	258.13	9	0.925624	2011
Ollesch	Lisa	18	127.64	19	259.44	12	0.922468	2011
Ollesch	Isabell	18	128.11	22	262.31	15	0.915734	2011
Strausa	Agata	22	128.12	23	259.78	14	0.924725	2011
Räker	Mira	23	128.89	27	263.68	17	0.916523	2011
Restle	Simret	27	128.99	28	259.61	13	0.931614	2011
Harrer	Corinna	21	120.34	1	244.3	1	0.923608	2012
Krebs	Denise	25	122.12	2	246.01	3	0.930755	2012
Sujew	Diana	22	122.29	3	245.71	2	0.933189	2012
Kesselring	Anne	23	122.66	5	256.75	9	0.895764	2012
Sujew	Elina	22	123.01	8	247.36	4	0.932421	2012
Krebs	Aline	24	123.5	9	264.18	17	0.876533	2012
Horna	Annett	25	123.64	10	251.35	5	0.922319	2012
Gess	Christine	18	124.58	12	267.42	24	0.873486	2012
Trost	Katharina	17	125.07	13	269.19	29	0.871155	2012
Kock	Maren	22	125.39	14	251.72	6	0.933999	2012
Udelhoven	Luna	18	127.52	23	267.81	25	0.892797	2012
Danner	Christiane	24	127.57	24	259.47	11	0.921855	2012
Nikoleit	Pia	18	128.92	30	263.89	16	0.916007	2012
Kesselring	Anne	24	122.12	1	253.9	7	0.901831	2013
Horna	Annett	26	123.01	2	250.98	4	0.918973	2013
Sujew	Elina	23	123.02	3	248.82	3	0.927026	2013
Harrer	Corinna	22	123.03	4	246.6	2	0.935447	2013
Marxen	Kerstin	28	124.04	8	262.32	17	0.886608	2013
Gess	Christine	19	124.22	9	266.28	27	0.87469	2013
Krebs	Denise	26	124.63	15	263.85	24	0.885659	2013
Granz	Caterina	19	125.04	17	259.72	13	0.902703	2013
Heim	Thea	21	125.54	18	255.67	9	0.920669	2013
Kock	Maren	23	125.81	19	252.51	6	0.934196	2013
Krause	Gesa Felicitas	21	126.37	21	255.58	8	0.927083	2013
Sujew	Diana	23	126.56	25	245.62	1	0.966127	2013
Strausa	Agata	24	126.62	26	250.98	5	0.945942	2013
Dietz	Maria	17	126.86	27	258.03	11	0.92184	2013
Klosterhalfen	Konstanze	16	127.52	29	266.58	28	0.896916	2013
Harrer	Corinna	23	122.5	3	250.09	4	0.918419	2014
Heim	Thea	22	123.12	5	252.94	9	0.912667	2014
Kock	Maren	24	123.24	6	250.28	5	0.923266	2014
Krebs	Denise	27	123.36	7	248.16	3	0.93206	2014
Klein	Hanna	21	123.84	9	255.49	11	0.908842	2014
Kesselring	Anne	25	124.03	10	252.02	6	0.922769	2014
Sujew	Elina	24	124.13	11	247.82	2	0.939165	2014
Marxen	Kersin	29	124.25	12	259.74	17	0.896931	2014
Sujew	Diana	24	124.36	13	245.72	1	0.948946	2014
Strausa	Agata	25	124.67	14	252.54	8	0.925621	2014
Granz	Caterina	20	125.57	18	253.25	10	0.929689	2014
Themann	Tabea	22	125.66	20	258.49	13	0.911496	2014
Kubasch	Stella	22	125.75	22	261.83	22	0.900513	2014
Klaassen	Lena	23	126.63	25	258.83	14	0.917325	2014
Klosterhalfen	Konstanze	17	127.15	26	259.97	18	0.917053	2014
Sickinger	Svenja	24	127.5	28	261.62	21	0.913778	2014
Nikoleit	Pia	20	127.86	30	261.55	20	0.916603	2014
Schmidt	Sarah	19	121.44	3	264.54	24	0.860739	2015
Klein	Hanna	22	121.6	4	249.91	4	0.912328	2015
Kubasch	Stella	23	124.1	6	258.69	12	0.899484	2015
Kock	Maren	25	125.27	7	247.56	1	0.948785	2015
Klaassen	Lena	24	125.27	8	261.81	19	0.897144	2015
Sujew	Elina	25	125.81	11	249.28	2	0.9463	2015
Sujew	Diana	25	125.89	12	252.03	7	0.93657	2015
Harrer	Corinna	24	125.92	13	250.04	5	0.944249	2015
Ballner	Ariane	19	125.98	14	265.93	27	0.888251	2015
Schulz	Johanna	21	126.27	15	261.14	17	0.906626	2015
Klosterhalfen	Konstanze	18	126.42	18	249.58	3	0.949746	2015
Roggel	Anja	20	126.97	22	257.27	10	0.925365	2015
Kick	Julia	25	127.68	27	257.95	11	0.928087	2015
Müller	Stefanie	23	127.7	29	260.18	14	0.920276	2015
Krebs	Denise	28	127.75	30	261.85	20	0.914765	2015
Klosterhalfen	Konstanze	19	121.55	3	246.91	1	0.923034	2016
Spill	Tanja	21	121.63	4	259.58	19	0.878559	2016
Klein	Hanna	23	123.29	5	248.56	5	0.930032	2016
Schmidt	Sarah	20	123.78	7	264.93	29	0.876033	2016
Krebs	Denise	29	124.34	9	248.14	4	0.93954	2016
Granz	Caterina	22	124.52	11	253.22	7	0.922024	2016
Gess	Christine	22	125.28	13	262.28	22	0.895608	2016
Kick	Julia	26	126.18	15	255.16	13	0.927212	2016
Kesselring	Anne	27	126.96	16	255.91	14	0.93021	2016
Sujew	Diana	26	127.65	23	247.4	3	0.967436	2016
Klaassen	Lena	25	127.68	24	261.26	21	0.916329	2016
Müller	Stefamie	24	128.18	25	263.84	23	0.910921	2016
Trost	Katharina	21	128.9	30	265.23	30	0.911237	2016
Klosterhalfen	Konstane	20	119.65	1	238.92	1	0.938991	2017
Krause	Gesa Felicitas	25	123.09	3	250.28	4	0.922142	2017
Trost	Katharina	22	124.06	4	254.41	10	0.914321	2017
Schwanz	Annemarie	24	124.65	6	250.98	7	0.931225	2017
Kalis	;areen	20	125	8	263.83	26	0.888356	2017
Kick	Julia	27	125.25	10	250.9	5	0.936005	2017
Klaassen	Lena	26	126.12	12	259.95	16	0.909694	2017
Staub	Joana	19	126.25	13	259.68	15	0.911579	2017
Krebs	Denise	30	126.72	15	253.21	9	0.938352	2017
Orth	Maren	27	128.31	24	254.75	11	0.944382	2017
Burkhard	Elena	25	128.53	25	250.92	6	0.960441	2017
Gess	Christine	23	128.8	28	263.49	23	0.916543	2017
Burkard	Elena	25	123.6	7.	246.51	4.	0.940124	2018
Gess	Christine	24	124.82	11.	262.31	24.	0.892217	2018
Granz	Caterina	24	124.67	10.	248.12	5.	0.94211	2018
Kalis	Mareen	21	123.53	6.	263.83	30.	0.877909	2018
Klein	Hanna	25	122.35	4.	246.46	3.	0.930805	2018
Krause	Gesa Felicitas	26	124.45	8.	254.12	8.	0.918242	2018
Reinert	Jana	20	125.12	12.	261.29	23.	0.897853	2018
Schmidt	Sarah	22	122.04	2.	257.37	12.	0.88909	2018
Spill	Tanja	23	122.26	3.	257.76	14.	0.889345	2018
Sujew	Diana	28	125.53	13.	245.95	1.	0.956978	2018
Ballner	Ariane	23	129.06	23.	259.4	14.	0.932874	2019
Coutellier	Vera	24	126.81	15.	253.35	5.	0.938499	2019
Granz	Caterina	25	123.46	3.	245.6	2.	0.942539	2019
Hausdorf	Lisa	17	128.41	22.	261.28	17.	0.921497	2019
Klein	Hanna	26	126.92	16.	248.12	3.	0.959113	2019
Klosterhalfen	Konstanze	22	124.18	4.	239.02	1.	0.974134	2019
Meisl	Verena	18	129.43	28.	262.95	20.	0.922918	2019
Reinert	Jana	21	124.9	8.	258.04	9.	0.907563	2019
Schulz	Johanna Christine	25	126.08	13.	253.47	6.	0.932655	2019
Trost	Katharina	24	120.36	2.	253.07	4.	0.891749	2019
Volkmer	Sophia	17	124.26	5.	262.32	19.	0.88818	2019
Burkard	Elena	28	127.31	18.	246.85	2.	0.967009	2020
Coutellier	Vera	25	127.74	19.	253.27	6.	0.94568	2020
de Graat	Patricia	22	128.23	22.	259.28	13.	0.927303	2020
Granz	Caterina	26	123.51	6.	251.19	5.	0.921937	2020
Gürth	Olivia	18	127.21	16.	267.34	26.	0.892193	2020
Hansen	Laura	30	129.1	28.	268.08	29.	0.902949	2020
Hering	Christina	26	120.47	1.	248.3	3.	0.909711	2020
Hoffmann	Vera	24	126.24	11.	259.18	12.	0.913265	2020
Klein	Hanna	27	123.46	5.	244.9	1.	0.945233	2020
Kolberg	Majtie	21	122.58	4.	261.35	15.	0.879424	2020
Meisl	Verena	19	126.53	14.	257.85	10.	0.920084	2020
Meyer	Fabiane	18	129.57	30.	262.06	17.	0.927054	2020
Reinert	Jana	22	126.31	12.	261.62	16.	0.905249	2020
Spill	Tanja	25	122.07	3.	257.81	9.	0.88779	2020
Trost	Katharina	25	120.82	2.	249.43	4.	0.908221	2020
Coutellier	Vera	26	126.6	17.	250.71	7.	0.946811	2021
de Graat	Patricia	23	127.71	23.	256.54	11.	0.933407	2021
Gürth	Olivia	19	128.5	29.	263.53	28.	0.91427	2021
Hering	Christina	27	119.78	3.	251.08	8.	0.894486	2021
Kallabis	Jolanda	16	125.75	12.	261.44	19.	0.901856	2021
Klein	Hanna	28	124.19	6.	242.58	1.	0.959915	2021
Kolberg	Majtie	22	119.24	2.	256.37	10.	0.872079	2021
Meisl	Verena	20	125.2	9.	257.06	12.	0.913211	2021
Reinert	Jana	23	125.15	8.	261.36	18.	0.897828	2021
Spill	Tanja	26	120.66	4.	255.7	9.	0.884777	2021
Swelam	Julia	27	126.89	19.	263.45	27.	0.903089	2021
Trost	Katharina	26	118.68	1.	245.17	2.	0.907636	2021
Weßel	Nele	22	126.86	18.	258.41	14.	0.920485	2021
Ammann	Alina	24	124.66	9.	256.74	14.	0.910405	2022
de Graat	Patricia	24	126.36	15.	257.42	15.	0.920383	2022
Gürth	Olivia	20	127.37	20.	260.59	19.	0.916454	2022
Kallabis	Jolanda	17	124.65	8.	254.08	10.	0.919863	2022
Klein	Hanna	29	121.7	4.	243.46	1.	0.937269	2022
Kolberg	Majtie	23	121.2	3.	258.44	16.	0.879314	2022
Meisl	Verena	21	124.96	11.	253.86	9.	0.92295	2022
Trost	Katharina	27	120.8	2.	243.53	2.	0.93007	2022
Weßel	Nele	23	126.21	14.	254.82	11.	0.92867	2022
