# Supplementary material for: Sex-specific characteristics of special endurance and performance potential in female runners
Source: BMC Res Notes. 2025 Apr 26;18:196. doi: 10.1186/s13104-025-07256-6 (PMC12032771; doi:10.1186/s13104-025-07256-6)
Supplement: Supplementary file 5 — Supplementary Material 5 [file 13104_2025_7256_MOESM5_ESM.xlsx]

## Sheet: 100-200
name, first name	date of birth	nation	sec 100m	sec 200m	KsA
ADEOYE Margaret	22 APR 1985	GBR GBR	11.28	22.88	0.986014
AGYAPONG Finette	01 FEB 1997	GBR GBR	11.21	22.69	0.9881
ALEKSEYEVA Tatyana	07 OCT 1963	URS URS	11.16	22.77	0.980237
ARRON Christine	13 SEP 1973	FRA FRA	10.73	22.26	0.964061
ASHER-SMITH Dina	04 DEC 1995	GBR GBR	10.83	21.88	0.989945
ATCHO Sarah	01 JUN 1995	SUI SUI	11.2	22.8	0.982456
AUERSWALD-LANGE Ingrid	02 SEP 1957	GDR GDR	11.04	22.6	0.976991
AZARASHVILI Maya	06 APR 1964	URS URS	11.08	22.24	0.996403
BACOUL Rose-Aimée	09 JAN 1952	FRA FRA	11.16	22.53	0.990679
BARBASHINA Elvira	25 FEB 1963	URS URS	11.12	22.27	0.998653
BAZOLO Lorène Dorcas	04 MAY 1983	POR POR	11.1	22.64	0.980565
BEHRENDT Kerstin	02 SEP 1967	GDR GDR	11.05	22.36	0.988372
BELKINA Olga	23 AUG 1990	RUS RUS	11.26	22.73	0.990761
BENTH Katia	16 NOV 1975	FRA FRA	11.2	22.87	0.979449
BESTUÉ Jaël	24 SEP 2000	ESP ESP	11.1	22.54	0.984916
BIKAR Alenka	07 JAN 1974	SLO SLO	11.21	22.76	0.985062
BILY Laurence	05 MAY 1963	FRA FRA	11.04	22.9	0.964192
BOCHINA Natalya	04 JAN 1962	URS URS	11.14	22.19	1.00406
BODENDORF Carla	13 AUG 1953	GDR GDR	11.22	22.64	0.991166
BOLINGO Cynthia	12 JAN 1993	BEL BEL	11.28	22.79	0.989908
BOLSUN Yelena	25 JUN 1982	RUS RUS	11.3	22.64	0.998233
BREHMER Christina	28 FEB 1958	GDR GDR	11.18	22.61	0.988943
BREUER Grit	16 FEB 1972	GDR GDR	11.13	22.45	0.991537
CALLENDER Bev	28 AUG 1956	GBR GBR	11.22	22.72	0.987676
CAZIER Marie-Christine	23 AUG 1963	FRA FRA	11.23	22.32	1.00627
CHEBANU Olena	04 JAN 1981	UKR UKR	11.19	22.97	0.974314
CHERVYAKOVA Svetlana	16 MAR 1963	URS URS	11.21	22.91	0.978612
COOK Kathy	03 MAY 1960	GBR GBR	11.1	22.1	1.00452
DEL PONTE Ajla	15 JUL 1996	SUI SUI	10.9	22.38	0.974084
DEMIROVA Yelizaveta	14 AUG 1987	RUS RUS	11.22	22.62	0.992042
DONKOVA Yordanka	28 SEP 1961	BUL BUL	11.27	22.95	0.982135
DRECHSLER Heike	16 DEC 1964	GDR GDR	10.91	21.71	1.00507
DUNN-THOMAS Paula	03 DEC 1964	GBR GBR	11.15	22.69	0.982812
EFTIMOVA Inna	19 JUN 1988	BUL BUL	11.2	22.94	0.97646
EKK Oksana	26 NOV 1974	RUS RUS	11.21	22.69	0.9881
EMMANOUILIDOU Polyniki	30 JUN 2003	GRE GRE	11.21	22.85	0.981182
FEDORIVA-SPAYER Aleksandra	13 SEP 1988	RUS RUS	11.28	22.19	1.01667
FÉLIX Sylviane	31 OCT 1977	FRA FRA	11.15	22.56	0.988475
FOTOPOULOU Olivia	20 DEC 1996	CYP CYP	11.25	22.71	0.990753
GACHEVSKA Monika	30 JAN 1974	BUL BUL	11.3	22.73	0.994281
GAUGEL Heidi-Elke	11 JUL 1959	FRG FRG	11.15	22.56	0.988475
GEIPEL-SCHMIDT Ines	07 JUL 1960	GDR GDR	11.21	22.87	0.980324
GEORGIEVA Nadezhda	02 SEP 1961	BUL BUL	11.09	22.42	0.989295
GEORGIEVA Zlatka	20 JUL 1969	BUL BUL	11.24	22.94	0.979948
GERMAN Natalya	10 NOV 1963	URS URS	11.19	22.47	0.995995
GEVAERT Kim	05 AUG 1978	BEL BEL	11.04	22.2	0.994595
GÖHR Marlies	21 MAR 1958	GDR GDR	10.81	21.74	0.99448
GONCHARENKO Svetlana	28 MAY 1971	RUS RUS	11.13	22.46	0.991095
GUSHCHINA Yuliya	04 MAR 1983	RUS RUS	11.13	22.53	0.988016
HAASE Rebekka	02 JAN 1993	GER GER	11.06	22.76	0.97188
HAGLUND Linda	15 JUN 1956	SWE SWE	11.16	22.82	0.978089
HAMANN Monika	08 JUN 1954	GDR GDR	11.03	22.76	0.969244
HANHIJOKI Sisko	25 APR 1962	FIN FIN	11.24	22.81	0.985533
HELTEN Ingeborg	31 DEC 1950	FRG FRG	11.04	22.68	0.973545
HENRY Desiree	26 AUG 1995	GBR GBR	11.06	22.46	0.984862
HOOPER Gloria	03 MAR 1992	ITA ITA	11.24	22.89	0.982088
HURTIS Muriel	25 MAR 1979	FRA FRA	10.96	22.31	0.982519
IVANOVA Lilyana	17 MAR 1956	BUL BUL	11.23	22.73	0.988121
JACQUES-SÉBASTIEN Lina	10 APR 1985	FRA FRA	11.3	22.59	1.00044
JANOTA Jolanta	06 JUL 1964	POL POL	11.19	22.9	0.977293
JARDIM Lucrécia	28 JAN 1971	POR POR	11.3	22.88	0.987762
KAMBUNDJI Mujinga	17 JUN 1992	SUI SUI	10.89	22.05	0.987755
KASPRZYK Ewa	07 SEP 1957	POL POL	10.93	22.13	0.987799
KHABAROVA Irina	18 MAR 1966	RUS RUS	11.18	22.34	1.0009
KIEŁBASIŃSKA Anna	26 JUN 1990	POL POL	11.22	22.76	0.98594
KLEYANKINA-MARKINA Marina	19 MAR 1962	URS URS	11.26	22.92	0.982548
KNOLL Silke-Beate	21 FEB 1967	GER GER	11.17	22.29	1.00224
KOCH Marita	18 FEB 1957	GDR GDR	10.83	21.71	0.997697
KOFFA Katerina	10 APR 1969	GRE GRE	11.12	22.67	0.981032
KOMISOVA Vera	11 JUN 1953	URS URS	11.26	22.96	0.980836
KONDRATYEVA Lyudmila	11 APR 1958	URS URS	11.02	22.31	0.987898
KOVTUN Natalya	27 MAY 1964	URS URS	11.12	22.69	0.980167
KRABBE Katrin	22 NOV 1969	GDR GDR	10.89	21.95	0.992255
KRATOCHVÍLOVÁ Jarmila	26 JAN 1951	TCH TCH	11.09	21.97	1.00956
KRAVCHENKO Anzhela	25 JAN 1971	UKR UKR	11.16	22.66	0.984996
KRUGLOVA Larisa	27 OCT 1972	RUS RUS	11.2	22.84	0.980736
KWAYIE Lisa Marie	27 OCT 1996	GER GER	11.19	22.77	0.982872
KYLLÖNEN Sanna	09 MAR 1971	FIN FIN	11.3	22.98	0.983464
LALOVA-COLLIO Ivet	18 MAY 1984	BUL BUL	10.77	22.32	0.965054
LANNAMAN Sonia	24 MAR 1956	GBR GBR	11.2	22.58	0.992028
LANSIQUOT Imani	17 DEC 1997	GBR GBR	11.01	22.93	0.960314
LESHCHOVA-GRIGORYEVA Yekaterina	21 APR 1974	RUS RUS	11.13	22.47	0.990654
LEVORATO Manuela	16 MAR 1977	ITA ITA	11.14	22.6	0.985841
LICHTENHAGEN Silke	20 NOV 1973	GER GER	11.24	22.73	0.989001
LOCKHOFF-SCHÖLZEL Bärbel	09 OCT 1959	GDR GDR	11.11	22.65	0.981015
LÜCKENKEMPER Gina	21 NOV 1996	GER GER	10.95	22.67	0.966034
MADUAKA Joice	30 SEP 1973	GBR GBR	11.23	22.83	0.983793
MAKARENKO Kristina	28 FEB 1997	RUS RUS	11.15	22.79	0.978499
MALCHUGINA Galina	17 DEC 1962	RUS RUS	10.96	22.18	0.988278
MANG Véronique	15 DEC 1984	FRA FRA	11.11	22.92	0.969459
MANNINEN Johanna	04 APR 1980	FIN FIN	11.27	22.93	0.982992
MARJAMAA Helinä	05 JUN 1956	FIN FIN	11.13	22.94	0.970357
MASLAKOVA Lyudmila	26 JUL 1952	URS URS	11.23	22.62	0.992927
MASULLO Marisa	08 MAY 1959	ITA ITA	11.29	22.88	0.986888
MAYER Lisa	02 MAY 1996	GER GER	11.12	22.64	0.982332
MAYR-KRIFKA Karin	04 JUN 1971	AUT AUT	11.15	22.7	0.982379
MIHALINEC Maja	17 DEC 1989	SLO SLO	11.27	22.78	0.989464
MÖLLER Esther	13 SEP 1977	GER GER	11.25	22.81	0.986409
MÖLLER Silke	20 JUN 1964	GDR GDR	10.86	21.74	0.99908
MOLOKOVA Marina	24 AUG 1962	URS URS	11.08	22.46	0.986643
MORGENSTERN Heike	13 DEC 1962	GDR GDR	11.3	22.65	0.997792
MÜLLER Laura	11 DEC 1995	GER GER	11.15	22.65	0.984547
MYERS Sandra	09 JAN 1961	ESP ESP	11.06	22.38	0.988382
NAIMOVA Tezdzhan	01 MAY 1987	BUL BUL	11.04	22.43	0.984396
NASONKINA Olena	11 AUG 1962	URS URS	11.3	22.48	1.00534
NEITA Daryll	29 AUG 1996	GBR GBR	10.9	22.23	0.980657
NELSON Ashleigh	20 FEB 1991	GBR GBR	11.19	22.85	0.979431
NESTSIARENKA Yulia	15 JUN 1979	BLR BLR	10.92	22.91	0.953296
NUNEVA Anelia	30 JUN 1962	BUL BUL	10.85	22.01	0.985915
OAKES Heather	14 AUG 1959	GBR GBR	11.2	22.92	0.977312
ONUORA Anyika	28 OCT 1984	GBR GBR	11.18	22.64	0.987633
OTTEY Merlene	10 MAY 1960	SLO SLO	11.09	22.72	0.976232
OYEPITAN Abiodun	30 DEC 1979	GBR GBR	11.17	22.5	0.992889
PAPILINA Tatyana	14 JAN 1967	URS URS	11.21	22.89	0.979467
PASCHKE Melanie	29 JUN 1970	GER GER	11.04	22.45	0.983519
PASTUSHENKO Olena	14 JUL 1979	UKR UKR	11.24	22.85	0.983807
PAVLOVA Pepa	1961	BUL BUL	11.3	22.68	0.996473
PENDAREVA Petya	20 JAN 1971	BUL BUL	11.12	22.78	0.976295
PÉREC Marie-José	09 MAY 1968	FRA FRA	10.96	21.99	0.996817
PHILIPP Andrea	29 JUL 1971	GER GER	11.05	22.25	0.993258
PINTO Tatjana	02 JUL 1992	GER GER	11	22.63	0.972161
PISIEWICZ Ewa	07 MAY 1962	POL POL	11.19	22.85	0.979431
POHREBNIAK Natalia	19 FEB 1988	UKR UKR	11.09	22.64	0.979682
POVH Olesya	18 OCT 1987	UKR UKR	11.08	22.58	0.981399
PRIVALOVA Irina	22 NOV 1968	RUS RUS	10.77	21.87	0.984911
PUKHA Irina	10 JAN 1973	UKR UKR	11.12	22.6	0.984071
PURSIAINEN Mona-Lisa	21 JUN 1951	FIN FIN	11.19	22.39	0.999553
RADECKA-PAKASZEWSKA Zuzanna	02 APR 1975	POL POL	11.29	22.96	0.983449
RÉGA Chantal	07 AUG 1955	FRA FRA	11.15	22.72	0.981514
RICHTER Annegret	13 OCT 1950	FRG FRG	11.01	22.39	0.983475
RIEGER-GÜNTHER Sabine	06 NOV 1963	GDR GDR	11.19	22.36	1.00089
ROCKMEIER Gabi	29 NOV 1973	GER GER	11.17	22.68	0.985009
RUSAKOVA Natalya	12 DEC 1979	RUS RUS	11.18	22.42	0.997324
RYEMYEN Mariya	02 AUG 1987	UKR UKR	11.06	22.58	0.979628
RYZHOVA Kseniya	19 APR 1987	RUS RUS	11.27	22.91	0.98385
SALAHUB Natallia	31 MAR 1975	BLR BLR	11.3	22.82	0.990359
SAMUEL Jamile	24 APR 1992	NED NED	11.1	22.37	0.992401
SARVARI Ulrike	22 JUN 1964	FRG FRG	11.16	22.88	0.975524
SCHIELKE Sina	19 MAY 1981	GER GER	11.16	22.78	0.979807
SCHIPPERS Dafne	15 JUN 1992	NED NED	10.81	21.63	0.999538
SCHNEIDER-MÜLLER Romy	26 JUL 1958	GDR GDR	11.02	22.47	0.980863
SIEMON Kirsten	19 APR 1961	GDR GDR	11.23	22.5	0.998222
SIRAGUSA Irene	23 JUN 1993	ITA ITA	11.21	22.96	0.976481
SLYUSAR Irina	19 MAR 1963	UKR UKR	11.05	22.59	0.978309
SLYUSSAR Antonina	19 MAR 1963	URS URS	11.29	22.97	0.983021
SOUMARÉ Myriam	29 OCT 1986	FRA FRA	11.03	22.11	0.997739
STECHER Renate	12 MAY 1950	GDR GDR	11.07	22.38	0.989276
STUY Hrystyna	03 FEB 1988	UKR UKR	11.2	22.66	0.988526
SZEWIŃSKA Irena	24 MAY 1946	POL POL	11.13	22.21	1.00225
TABAKOVA Yuliya	01 MAY 1980	RUS RUS	11.1	22.51	0.986228
TAKÁCS Boglárka	28 AUG 2001	HUN HUN	11.14	22.77	0.97848
ŢIRLEA-MANOLACHE Ionela	09 FEB 1976	ROU ROU	11.3	22.35	1.01119
TOMCZAK Elżbieta	07 JAN 1961	POL POL	11.18	22.76	0.982425
TRANDENKOVA Marina	07 JAN 1967	RUS RUS	11.06	22.44	0.98574
TSCHIRCH Cathleen	23 JUL 1979	GER GER	11.3	22.97	0.983892
TSIMANOUSKAYA Krystsina	19 NOV 1996	BLR BLR	11.04	22.75	0.970549
VADER Els	24 SEP 1959	NED NED	11.17	22.81	0.979395
VAN HUNENSTIJN Marije	02 MAR 1995	NED NED	11.13	22.89	0.972477
VINOGRADOVA Natalya	28 FEB 1973	BLR BLR	11.05	22.68	0.974427
VINOGRADOVA-PETUSHINSKAYA Yelena	28 MAR 1964	RUS RUS	11.28	22.8	0.989474
VORONOVA Natalya	09 JUL 1965	URS URS	10.98	22.35	0.98255
WALTER Annelies	06 DEC 1959	GDR GDR	11.23	22.77	0.986386
WALTHER Gesine	06 OCT 1962	GDR GDR	11.13	22.24	1.0009
WILLIAMS Bianca	18 DEC 1993	GBR GBR	11.17	22.58	0.989371
WILLIAMS Jodie	28 SEP 1993	GBR GBR	11.17	22.46	0.994657
WÖCKEL Bärbel	21 MAR 1955	GDR GDR	10.95	21.85	1.00229
ZAHI Carolle	12 JUN 1994	FRA FRA	11.01	22.85	0.963676
ZHIROVA Marina	06 JUN 1963	URS URS	10.98	22.46	0.977738
ZOLOTARYOVA Olga	01 NOV 1961	URS URS	11.2	22.8	0.982456

## Sheet: 200-400
name, first name	date of birth	nation	sec 200m	sec 400m	KsA
ADELEKE Rhasidat	2002-08-29	IRLIRL	22.34	49.2	0.90813
ALEKSEYEVA Tatyana	07 OCT 1963	URSURS	22.77	49.98	0.911164
ANTYUKH Natalya	1981-06-26	RUSRUS	22.75	49.85	0.912738
ARTYMATA Eleni	16 MAY 1986	CYPCYP	22.61	50.8	0.890157
BASKAKOVA Irina	1956-08-25	URSURS	22.96	50.19	0.914923
BEJNAR Monika	10 MAR 1981	POLPOL	22.91	51.68	0.88661
BELIMPASAKI Maria	1991-06-19	GREGRE	22.98	50.45	0.911001
BENEŠOVÁ Hana	1975-04-19	CZECZE	22.57	51.18	0.881985
BLASZAK Genowefa	1957-08-22	POLPOL	22.9	50.7	0.903353
BOCHINA Natalya	1962-01-04	URSURS	22.19	51.47	0.86225
BOL Femke	2000-02-23	NEDNED	22.88	49.44	0.925566
BOLINGO Cynthia	1993-01-12	BELBEL	22.79	50.19	0.908149
BREUER Grit	1972-02-16	GERGER	22.45	49.42	0.908539
BRYZGINA Olga	1963-06-30	URSURS	22.44	48.27	0.92977
BUSCH Sabine	1962-11-21	GDRGDR	22.83	49.24	0.927295
COOK Kathy	03 MAY 1960	GBRGBR	22.1	49.43	0.894194
FIRMIN Lenora GUION	1991-08-07	FRAFRA	22.91	51.68	0.88661
FOMENKO Viktoriya	02 OCT 1970	UKRUKR	22.57	50.94	0.886141
GEVAERT Kim	1978-08-05	BELBEL	22.2	51.45	0.862974
GHOSH Shanta	1975-01-03	GERGER	22.8	51.25	0.889756
GONCHARENKO Svetlana	28 MAY 1971	RUSRUS	22.46	50.23	0.894286
GRENOT Libania	1983-07-12	ITAITA	22.56	50.3	0.897018
GUSHCHINA Yuliya	04 MAR 1983	RUSRUS	22.53	50.01	0.90102
HARTLEY Donna	01 MAY 1955	GBRGBR	22.75	51.43	0.884698
HURTIS Muriel	25 MAR 1979	FRAFRA	22.31	51.41	0.867925
IKAUNIECE Vineta	04 DEC 1962	URSURS	22.49	50.71	0.887005
IVANOVA Natalya	1981-06-25	RUSRUS	22.97	50.79	0.904509
KACZMAREK Natalia	1998-01-17	POLPOL	22.86	49.48	0.92401
KAPACHINSKAYA Anastasiya	1979-11-21	RUSRUS	22.38	50.02	0.894842
KHARLAMOVA Marina	24 MAY 1962	URSURS	22.93	50.63	0.905787
KIEŁBASIŃSKA Anna	1990-06-26	POLPOL	22.76	50.28	0.90533
KLAVER Lieke	1998-08-20	NEDNED	22.46	49.81	0.901827
KNOLL Silke-Beate	1967-02-21	GERGER	22.29	50.85	0.876696
KOCEMBOVÁ Taťána	02 MAY 1962	TCHTCH	22.47	48.59	0.924882
KOCH Marita	1957-02-18	GDRGDR	21.71	47.6	0.912185
KRATOCHVÍLOVÁ Jarmila	1951-01-26	TCHTCH	21.97	47.99	0.915607
LEVINA Tatyana	1977-02-28	RUSRUS	22.69	50.78	0.893659
LITVINOVA Lyudmila	1985-06-08	RUSRUS	22.82	50.27	0.907897
MERRY Katharine	1974-09-21	GBRGBR	22.76	49.59	0.917927
MYERS Sandra	1961-01-09	ESPESP	22.38	49.67	0.901148
NAZAROVA Olga	1965-06-01	URSURS	22.68	49.11	0.923641
NEUBAUER Dagmar	1962-06-03	GDRGDR	22.87	49.58	0.922549
NOVIKOVA Yelena	27 OCT 1985	RUSRUS	22.86	51.3	0.891228
OANTA Iolanda	11 OCT 1965	ROUROU	22.7	50.55	0.898121
OHURUOGU Christine	17 MAY 1984	GBRGBR	22.85	49.41	0.924914
ONUORA Anyika	28 OCT 1984	GBRGBR	22.64	50.87	0.890112
PACHOLAK-GUZOWSKA Anna	1980-01-15	POLPOL	22.87	51.29	0.891792
PAVLOVA Pepa	1961	BULBUL	22.68	51.32	0.883866
PÉREC Marie-José	09 MAY 1968	FRAFRA	21.99	48.25	0.911503
PIPI Ama	1995-11-26	GBRGBR	22.95	50.75	0.904433
POSPELOVA Svetlana	24 DEC 1979	RUSRUS	22.39	49.8	0.899197
PRIVALOVA Irina	1968-11-22	RUSRUS	21.87	49.89	0.876729
PURSIAINEN Mona-Lisa	1951-06-21	FINFIN	22.39	51.27	0.873415
PYHYDA Nataliya	1981-01-30	UKRUKR	22.82	50.62	0.90162
RADECKA-PAKASZEWSKA Zuzanna	1975-04-02	POLPOL	22.96	51.58	0.890268
RENZHINA Yekaterina	18 OCT 1994	RUSRUS	22.61	51.01	0.886493
ROCKMEIER Birgit	1973-11-29	GERGER	22.9	51.45	0.890185
RUZINA Yelena	1964-04-03	URSURS	22.73	50.65	0.897532
RYZHOVA Kseniya	1987-04-19	RUSRUS	22.91	49.8	0.92008
SALAHUB Natallia	31 MAR 1975	BLRBLR	22.82	51.61	0.884325
SCHERSING Petra	1965-07-18	GDRGDR	22.61	49.3	0.917241
SCHWAB Corinna	1999-04-05	GERGER	22.51	50.91	0.884306
SCUTT Michelle	1960-06-17	GBRGBR	22.8	50.63	0.900652
SHMONINA Marina	1965-02-09	URSURS	22.82	50.52	0.903405
SIDOROVA Marina	1950-01-16	URSURS	22.72	50.98	0.89133
SINZEL Margit	1958-06-17	GDRGDR	22.81	50.92	0.895915
SPRUNGER Lea	05 MAR 1990	SUISUI	22.38	50.52	0.885986
STAMBOLOVA Vanya	1983-11-28	BULBUL	22.81	49.53	0.921058
STOUTE Jennifer	1965-04-16	GBRGBR	22.73	51.53	0.882205
STREIDT Ellen	1952-07-27	GDRGDR	22.73	50.15	0.906481
STUY Hrystyna	1988-02-03	UKRUKR	22.66	51.58	0.878635
SZEWIŃSKA Irena	24 MAY 1946	POLPOL	22.21	49.29	0.901197
THIMM Ute	1958-07-10	FRGFRG	22.87	50.28	0.909706
ŢIRLEA-MANOLACHE Ionela	1976-02-09	ROUROU	22.35	49.88	0.896151
VAIČULE Gunta	09 MAR 1995	LATLAT	22.94	51.25	0.89522
VINOGRADOVA-PETUSHINSKAYA Yelena	28 MAR 1964	URSURS	22.8	51.38	0.887505
WALTHER Gesine	06 OCT 1962	GDRGDR	22.24	50.03	0.889067
WALTHER Kerstin	1961-04-15	GDRGDR	22.86	51.12	0.894366
WILLIAMS Jodie	1993-09-28	GBRGBR	22.46	49.97	0.898939
WILMI-HÄGGMAN Pirjo	1951-06-08	FINFIN	22.96	50.56	0.908228
WÖCKEL Bärbel	21 MAR 1955	GDRGDR	21.85	49.56	0.881759
YURCHENKO Aelita	1965	URSURS	22.67	49.47	0.916515
ZAYTSEVA Olga	1984-11-10	RUSRUS	22.67	49.49	0.916145
ZYKINA Olesya	07 OCT 1980	RUSRUS	22.55	50.15	0.899302

## Sheet: 400-800
name, first name	date of birth	nation	sec 400m	sec 800m	KsA
BUSSMANN Gaby	08 OCT 1959	FRGFRG	49.75	118.11	0.842435
DRYAKHLOVA Mariya	1984-04-24	RUSRUS	51.57	118.26	0.872146
FUCHSOVÁ Helena	1965-06-03	CZECZE	50.21	118.56	0.846997
GOOSSENS Ester	1972-02-21	NEDNED	51.35	119.24	0.861288
GURINA Lyubov	1957-08-06	URSURS	51.38	115.56	0.889235
HORVAT Anita	1996-09-07	SLOSLO	51.22	118.73	0.862798
KHRUSHCHELYOVA Natalya	20 MAY 1973	RUSRUS	51.49	116.59	0.883266
KIRILOVA Tsvetelina	1977-07-14	BULBUL	51.63	119.46	0.86439
KISABAKA Linda	1969-04-09	GERGER	51.16	118.24	0.865359
KOTLYAROVA Olga	1976-04-12	RUSRUS	49.77	117.24	0.849028
KRATOCHVÍLOVÁ Jarmila	1951-01-26	TCHTCH	47.99	113.28	0.847281
MATUSEVIČIENĖ Dalia	1962-11-12	URSURS	51.12	117.27	0.871834
MINEYEVA Olga	01 OCT 1952	URSURS	50.78	114.81	0.884592
NEUBAUER Dagmar	1962-06-03	GDRGDR	49.58	118.36	0.837783
OLIZARENKO Nadezhda	1953-11-28	URSURS	50.96	113.43	0.898528
PODYALOVSKAYA Irina	19 OCT 1959	URSURS	51.67	115.69	0.893249
USOVICH Ilona	1982-11-14	BLRBLR	50.31	119.38	0.842855
USOVICH Svetlana	14 OCT 1980	BLRBLR	50.79	118.11	0.860046
WACHTEL Christine	1965-01-06	GDRGDR	51.62	115.32	0.895248
YEVSEYEVA Inna	1964-08-14	URSURS	50.8	117.2	0.866894

## Sheet: 800-1500
name, first name	date of birth	nation	sec 800m	sec 1500m	KsA
AGLETDINOVA Ravilya	1960-02-10	URSURS	116.24	238.4	0.91422
AREGAWI Abeba	1990-07-05	SWESWE	119.2	236.6	0.944632
ARTYOMOVA Natalya	1963-01-05	URSURS	118.05	239.16	0.925505
BAIKAUSKAITĖ Laimutė	1956-06-10	URSURS	118.52	240.24	0.925012
BAILEY Shireen	1959-09-27	GBRGBR	118.98	242.32	0.920632
BAKER Ellie	1998-06-03	GBRGBR	119.52	243.95	0.918631
BARBULESCU-POPESCU Liliana	1982-02-05	ROUROU	119.34	240.35	0.930986
BECLEA-SZEKELY Violeta	26 MAR 1965	ROUROU	118.57	238.29	0.932976
BELLÒ Elena	1997-01-18	ITAITA	118.97	245.09	0.91015
BIRYUKOVA-SAMOROKOVA Irina	06 DEC 1964	RUSRUS	119.07	244.66	0.912516
BLETSCH Yvette	1965-08-22	GDRGDR	119.43	245.12	0.913558
BORISOVA Lyudmila	1959-07-30	URSURS	116.78	242.13	0.904318
BRUNS Ulrike	1953-11-17	GDRGDR	117.06	239.9	0.914912
BUHĂIANU-ANTOCI Elena	1975-01-16	ROUROU	119.43	242.9	0.921907
BUKIS Anna	1953-09-08	POLPOL	118.51	239.67	0.927134
CAHILL Christina	25 MAR 1957	GBRGBR	119.05	240.57	0.927874
ČEPLAK Jolanda	1976-09-12	SLOSLO	115.19	242.44	0.890865
CHAHYD Hind DEHIBA	17 MAR 1979	FRAFRA	118.67	239.76	0.928037
CHERKASOVA Svetlana	20 MAY 1978	RUSRUS	116.93	245.55	0.892868
CHIDU Tudorita	17 OCT 1967	ROUROU	117.64	245.69	0.897778
CHIZHENKO Yuliya	1979-08-30	RUSRUS	117.07	235.68	0.931374
CHUVASHOVA Vera	07 OCT 1959	URSURS	118.12	245.73	0.901294
CICHOCKA Angelika	15 MAR 1988	POLPOL	118.41	241.61	0.918914
CIONCAN Maria	1977-06-19	ROUROU	119.44	238.39	0.939427
CONSTANTIN Mitica	1962-08-18	ROUROU	117.87	243.04	0.909341
CUSMA Elisa	1981-07-24	ITAITA	118.63	244.98	0.907957
DJATÉ-TAILLARD Patricia	1971-01-03	FRAFRA	116.53	242.26	0.901898
DORIO Gabriella	1957-06-26	ITAITA	117.66	238.65	0.924419
ENGLAND Hannah	06 MAR 1987	GBRGBR	119.66	241.89	0.927539
ENNAOUI Sofia	1995-08-30	POLPOL	118.98	239.7	0.930695
EWERLÖF Malin	1972-06-02	SWESWE	119.44	245.49	0.912257
GASSER Sandra	1962-07-27	SUISUI	118.9	241.1	0.924668
GERDES Roswitha	1961-06-28	FRGFRG	118.88	244.41	0.911992
GHICAN Viorica	1965-06-09	ROUROU	118.96	242.76	0.918809
GIOLITTI Florence	1966-08-31	FRAFRA	119.32	245.78	0.910265
GORELOVA Natalya	1973-04-18	RUSRUS	117.9	239.7	0.922247
GUERRERO Esther	1990-02-07	ESPESP	119.22	242.41	0.922146
GULYAYEVA Aleksandra	1994-04-30	RUSRUS	118.34	244.49	0.907552
GURINA Lyubov	1957-08-06	URSURS	115.56	242.47	0.893616
HASSAN Sifan	1993-01-01	NEDNED	116.81	231.95	0.94425
HOFFMEISTER Gunhild	1944-07-06	GDRGDR	118.61	241.4	0.921267
HOLMES Kelly	1970-04-19	GBRGBR	116.21	237.9	0.915905
IVAN Paula	1963-07-20	ROUROU	116.42	233.96	0.933012
JACKSON Emma	1988-06-07	GBRGBR	119.37	245.83	0.910461
JUDD Jess	1995-01-07	GBRGBR	119.77	243.73	0.921383
KAZANKINA Tatyana	17 DEC 1951	URSURS	114.94	232.47	0.927055
KIESSLING Ellen	1968-02-17	GDRGDR	119.41	244.44	0.915946
KITOVA Svetlana	1960-06-25	URSURS	118.08	241.02	0.918596
KLINGER Margrit	1960-06-22	FRGFRG	117.22	242.66	0.905743
KLOCOVÁ Lucia	1983-11-20	SVKSVK	118.51	242.99	0.914467
KLOSTERHALFEN Konstanze	1997-02-18	GERGER	119.65	238.92	0.938991
KOSTETSKAYA Yekaterina	31 DEC 1986	RUSRUS	116.67	241.77	0.904811
KRAUS Brigitte	1956-08-12	GERGER	119.28	241.54	0.925934
KREMLYOVA Lyubov	21 DEC 1961	URSURS	118.95	238.71	0.934319
KUIVISTO Sara	1991-08-17	FINFIN	119.41	242.35	0.923845
KUZNETSOVA Olga	23 OCT 1967	RUSRUS	118.77	243.18	0.915757
LANGE-HAHMANN Andrea	1966-06-03	GDRGDR	117.31	240.07	0.916217
LISHCHINSKA Irina	1976-01-15	UKRUKR	119.15	240.04	0.930704
LOVIN Fita	1951-01-14	ROUROU	116.67	240.12	0.911029
MAGEEAN Ciara	12 MAR 1992	IRLIRL	119.27	236.63	0.945067
MAI Yvonne	1965-08-22	GDRGDR	118.32	242.69	0.914129
MÅKESTADBOVIM Ingvill	1981-08-07	NORNOR	119.82	242.2	0.927591
MARTÍNEZ Mayte	17 MAY 1976	ESPESP	117.62	245.05	0.899969
MASTERKOVA Svetlana	1968-01-17	RUSRUS	115.87	237.11	0.916268
MELINTE Doina	27 DEC 1956	ROUROU	115.05	236.7	0.911359
MITREA Aurica	19 OCT 1959	ROUROU	119.27	244.83	0.913414
MUIR Laura	09 MAY 1993	GBRGBR	116.73	234.5	0.933342
NELYUBOVA Olga	1964-07-12	RUSRUS	119.29	241.42	0.926472
NEUMANN-LIEBETRAU Christina	30 DEC 1953	GDRGDR	119.47	245.3	0.913193
OEHME Heike	1963-11-11	GDRGDR	118.16	242.9	0.912104
OLIZARENKO Nadezhda	1953-11-28	URSURS	113.43	239.48	0.888096
PADUREAN Ana	05 MAY 1969	ROUROU	119.53	244.97	0.914882
PANTELEYEVA Natalya	1983-09-10	RUSRUS	119.21	240.81	0.928195
PETROVA Totka	17 DEC 1956	BULBUL	116.59	240.15	0.91029
PODKOPAYEVA Yekaterina	1952-06-11	URSURS	115.96	236.65	0.918762
POPOVA Svetlana	1959-02-03	URSURS	119.43	240.53	0.930991
PROVIDOKHINA Tatyana	26 MAR 1953	URSURS	115.46	238.37	0.908199
PUICĂ Maricica	1950-07-29	ROUROU	118.12	237.22	0.933627
REEKIE Jemma	06 MAR 1998	GBRGBR	116.9	238.65	0.918448
RIGEL Zoya	15 OCT 1952	URSURS	116.57	243.9	0.896141
ROGACHOVA Lyudmila	30 OCT 1966	URSURS	116.82	236.91	0.92456
RYDZ Małgorzata	1967-01-18	POLPOL	119.12	241.91	0.923277
SACRAMENTO Carla	10 DEC 1971	PORPOR	118.94	237.71	0.93817
SHARMINA Yekaterina	1986-08-06	RUSRUS	119.17	245.06	0.911792
SHTEREVA Nikolina	1955-01-21	BULBUL	115.42	242.33	0.893049
SILAI Ileana	14 OCT 1941	ROUROU	117.39	243.5	0.903927
SNOWDEN Katie	09 MAR 1994	GBRGBR	118	240.04	0.921721
SOBOLEVA Yelena	03 OCT 1982	RUSRUS	117.28	236.43	0.930085
SOROKINA Tamara	1950-08-15	URSURS	117.55	238.89	0.922627
STOYANOVA-GOSPODINOVA Vanya	12 DEC 1958	BULBUL	118.78	243.14	0.915985
TOMOVA Lilyana	1946-08-09	BULBUL	118.14	244.97	0.904243
TRABALDO Fabia	05 MAR 1972	ITAITA	119.51	243.62	0.919798
TRACEY Adelle	27 MAY 1993	GBRGBR	119.5	242.55	0.923779
TROST Katharina	1995-06-28	GERGER	118.68	242.32	0.91831
ULLRICH-KÖRNER Hildegard	20 DEC 1959	GDRGDR	117.2	238.67	0.920727
VAN HULST Elly	1959-06-09	NEDNED	119.62	243.63	0.920607
VARGA Judit	1976-04-16	HUNHUN	119.46	241.26	0.928407
VESELKOVA Lyudmila	25 OCT 1950	URSURS	115.96	242.37	0.897079
WADE Kirsty	1962-08-06	GBRGBR	117.42	240.73	0.914562
WARTENBERG Christiane	27 OCT 1956	GDRGDR	118.63	237.71	0.935725
WÜHN Katrin	1965-11-19	GDRGDR	117.86	243.77	0.906541
YACHMENEVA Marina	1961-07-14	URSURS	118.84	242.84	0.917579
YATSINSKA Vesela	1951-01-16	BULBUL	119.03	244.7	0.912061
YEVDOKIMOVA Natalya	17 MAR 1978	RUSRUS	118.75	237.73	0.936593
ZAKHAROVA Galina	1956-09-07	URSURS	117.08	237.72	0.92346
ZAVYALOVA Yekaterina	01 MAR 1991	RUSRUS	117.53	240.11	0.917782
ZAYTSEVA Zamira	1953-02-16	URSURS	116.21	236.14	0.922731
ZBROZHEK Oksana	1978-01-12	RUSRUS	118.06	240.86	0.91905
ZOLOTOVA Yevgeniya	1983-04-28	RUSRUS	119.85	242.49	0.926713
ZÚÑIGA Maite	28 DEC 1964	ESPESP	117.45	240.59	0.915328

## Sheet: 1500-3000
name, first name	date of birth	nation	sec 1500m	sec 3000m	KsA
ABEYLEGESSE Elvan	1982-09-11	TURTUR	238.28	511.94	0.93089
AGLETDINOVA Ravilya	1960-02-10	URSURS	238.4	526.86	0.904984
APLACHKINA Svetlana	1992-11-28	ANAANA	245.51	519.95	0.94436
ARTYOMOVA Natalya	1963-01-05	URSURS	239.16	511.67	0.934821
BAHTA Meraf	1989-06-24	SWESWE	240.49	517.5	0.92943
BARANOVA Lyudmila	1950	URSURS	244.36	530.63	0.921018
BARTH Birgit	1962-06-19	GDRGDR	243.9	531.04	0.918575
BELOUSOVA Raisa	1952-02-29	URSURS	242.9	524.7	0.925862
BENNING Christine	30 MAR 1955	GBRGBR	241.53	524.46	0.921062
BENTHAMI-GHEZIELLE Bouchra	19 MAY 1979	FRAFRA	241.28	515.41	0.936264
BESLIU-IONESCU Iulia	1965-07-03	ROUROU	244.36	521.54	0.937071
BITZNER-DUCRET Blandine	01 DEC 1965	FRAFRA	244.72	533.99	0.916571
BOBOROVA Natalya	1959-02-12	URSURS	240.62	528.31	0.910905
BORISOVA Lyudmila	1966-08-03	RUSRUS	242.13	520.78	0.929874
BRAGINA Lyudmila	1943-07-24	URSURS	241.38	507.12	0.951964
BRIAND-CALENIC Dorina	1969-04-04	ROUROU	245.35	532.52	0.921468
BRUNET Roberta	20 MAY 1965	ITAITA	243.01	515.65	0.942539
BRUNS Ulrike	1953-11-17	GDRGDR	239.9	516.38	0.929161
BRZEZIŃSKA Anna	1971-01-09	POLPOL	243.75	524.05	0.930255
BUDD Zola	26 MAY 1966	GBRGBR	239.96	508.83	0.943183
BÜRKI Cornelia	03 OCT 1953	SUISUI	239.9	518.71	0.924987
CAHILL Christina	25 MAR 1957	GBRGBR	240.57	529.89	0.908
CHECA Dolores	27 DEC 1982	ESPESP	242.77	517.78	0.937734
CHIZHENKO Yuliya	1979-08-30	RUSRUS	235.68	524.6	0.898513
CHOJECKA Lidia	1977-01-25	POLPOL	239.22	511.69	0.935019
CHURBANOVA Olga	1965-07-16	RUSRUS	242.1	520.48	0.930295
CLITHEROE Helen	1974-01-02	GBRGBR	241.1	531.82	0.906698
COURTNEY-BRYANT Melissa	1993-08-30	GBRGBR	238.01	519.2	0.916834
CRUCIATA Silvana	1953-02-15	ITAITA	243.88	526.8	0.925892
DA FONSECA-WOLLHEIM Kristina	1972-02-10	GERGER	241.42	517.3	0.933385
DEHIBA CHAHYD Hind	17 MAR 1979	FRAFRA	239.76	532.21	0.900998
DEJAEGHERE Veerle	1973-08-01	BELBEL	245.05	529.31	0.925922
DOBRISKEY Lisa	23 DEC 1983	GBRGBR	239.5	534.12	0.896802
DOMÍNGUEZ Marta	1975-11-03	ESPESP	244.84	508.8	0.962421
DVIRNA Olga	1953-02-11	URSURS	234.23	516.4	0.907165
FERNÁNDEZ Nuria	1976-08-16	ESPESP	240.2	518.05	0.927324
FIDATOV Elena	1960-07-24	ROUROU	243.92	521.98	0.934595
FRANKIEWICZ Wioletta	1977-06-09	POLPOL	243.09	524.22	0.927435
GASSER Sandra	1962-07-27	SUISUI	241.1	534.13	0.902776
GEGA Luiza	1988-11-05	ALBALB	242.63	526.61	0.921479
GERDES Roswitha	1961-06-28	FRGFRG	244.41	534.6	0.914366
GHICAN Viorica	1965-06-09	ROUROU	242.76	522.39	0.929421
GRØVDAL Karoline Bjerkeli	1990-06-14	NORNOR	243.07	513.47	0.946774
GUSKOVA Svetlana	1957-08-19	URSURS	237.05	509.36	0.930776
HASSAN Sifan	1993-01-01	NEDNED	231.95	498.49	0.93061
HEALY Sarah	2001-02-13	IRLIRL	241.75	526.14	0.918957
HOLOVCHENKO Tetyana	1980-02-13	UKRUKR	245.01	530.67	0.923399
IVAN Paula	1963-07-20	ROUROU	233.96	507.15	0.922646
JUDD Jess	1995-01-07	GBRGBR	243.73	532.73	0.915023
KAZANKINA Tatyana	17 DEC 1951	URSURS	232.47	502.62	0.925033
KESZEG Margareta	1965-08-31	ROUROU	245.29	519.94	0.943532
KIESSLING Ellen	1968-02-17	GDRGDR	244.44	526.99	0.927684
KLEIN Hanna	1993-04-06	GERGER	242.58	525	0.924114
KLOSTERHALFEN Konstanze	1997-02-18	GERGER	238.92	500.07	0.955546
KOBA Tamara	1957-02-24	URSURS	241.66	527.99	0.915396
KOMYAGINA Olga	1974-02-10	RUSRUS	242.32	522.58	0.927399
KOROBKINA Yelena	1990-11-25	RUSRUS	244.54	531	0.921055
KOSTER Maureen	1992-07-03	NEDNED	239.79	515.93	0.929545
KRAUS Brigitte	1956-08-12	FRGFRG	241.54	515.11	0.937819
KREMLYOVA Lyubov	21 DEC 1961	RUSRUS	238.71	526.94	0.906023
KRUMINS Susan	1986-07-08	NEDNED	242.25	514.41	0.941856
KUZYUKOVA Olga	17 MAY 1953	URSURS	244.77	518.22	0.944657
LANGE-HAHMANN Andrea	1966-06-03	GDRGDR	240.07	530.94	0.904321
LEHMANN-VEITH Gabriele	24 OCT 1956	GDRGDR	243.1	532.6	0.91288
MAI Yvonne	1965-08-22	GDRGDR	242.69	532.78	0.911033
MÅKESTAD BOVIM Ingvill	1981-08-07	NORNOR	242.2	534.57	0.906149
MÄKI Kristiina	1991-09-22	CZECZE	241.23	531.69	0.907408
MĂRĂŞESCU Natalia	03 OCT 1952	ROUROU	238.2	513.53	0.927697
MARUSOVA Margarita	1967-11-25	RUSRUS	242.86	524.26	0.926487
MCCOLGAN Eilish	1990-11-25	GBRGBR	240.97	511	0.943131
MCCOLGAN Liz	24 MAY 1964	GBRGBR	241.38	518.23	0.931555
MELINTE Doina	27 DEC 1956	ROUROU	236.7	517.11	0.915473
MEZULIÁNÍKOVÁ Diana	1992-04-10	CZECZE	243.7	533.72	0.913213
MIŠMAŠ ZRIMŠEK Maruša	24 OCT 1994	SLOSLO	243.05	526.44	0.923372
MUIR Laura	09 MAY 1993	GBRGBR	234.5	510.53	0.918653
MURRAY Yvonne	04 OCT 1964	GBRGBR	241.2	509.02	0.947703
NELYUBOVA Olga	1964-07-12	RUSRUS	241.42	527.9	0.914643
NIKITINA Irina	1961-06-16	URSURS	240.18	525.7	0.913753
O'SULLIVAN Sonia	1969-11-28	IRLIRL	238.85	501.64	0.952277
PANTYUKOVA Mariya	1974-08-14	RUSRUS	245.1	510.18	0.960837
PARRY-TULLETT Hayley	1973-02-17	GBRGBR	239.95	525.39	0.913417
PAVEY Joanne	1973-09-20	GBRGBR	241.79	511.27	0.945841
PLIŚ Renata	1985-02-05	POLPOL	243.5	519.18	0.938018
POSSAMAI Agnese	1953-01-17	ITAITA	245.14	517.96	0.94656
POZDNYAKOVA Tetyana	04 MAR 1956	URSURS	236.5	512	0.923828
PUICĂ Maricica	1950-07-29	ROUROU	237.22	507.83	0.93425
RADCLIFFE Paula	17 DEC 1973	GBRGBR	245.37	502.2	0.97718
RALLDUGINA Nadezhda	1957-11-15	URSURS	236.63	529.17	0.894344
RODRÍGUEZ Natalia	1979-06-02	ESPESP	239.51	515.86	0.928585
ROMANOVA Andzhela	06 MAY 1961	URSURS	243.7	528.54	0.922163
ROMANOVA Giana	10 MAR 1955	URSURS	239.01	521.8	0.916098
ROMANOVA Yelena	20 MAR 1963	RUSRUS	240.91	510.45	0.943912
SACRAMENTO Carla	10 DEC 1971	PORPOR	237.71	510.22	0.931794
SADREYDINOVA Raisa	09 MAY 1950	URSURS	245.8	521.05	0.94348
SHOBUKHOVA Liliya	1977-11-13	RUSRUS	243.78	514.85	0.946994
SIPATOVA Yelena	1955-06-07	URSURS	239.48	513.53	0.932682
SLY Wendy	1959-11-05	GBRGBR	244.14	517.06	0.944339
SMEKHNOVA Raisa	1950-09-16	URSURS	239.8	521.77	0.919179
SMOLKA Lyubov	1952-11-29	URSURS	240.8	516	0.933333
SUJEW Diana	1990-11-02	GERGER	245.62	527.68	0.930943
SZABO Gabriela	1975-11-14	ROUROU	236.97	501.42	0.945196
SZALAI Katalin	04 MAR 1961	HUNHUN	243.51	531.5	0.916312
TOBIAS Nataliya	1980-11-22	UKRUKR	241.78	531.32	0.910111
TOMASHOVA Tatyana	1975-07-01	RUSRUS	236.91	505.56	0.937218
TURAVA Alesia	06 DEC 1979	BLRBLR	239.89	512.89	0.935444
TWELL Stephanie	1989-08-17	GBRGBR	242.54	520.98	0.931091
ULMASOVA Svetlana	1953-02-04	URSURS	238.76	506.78	0.942263
VAN HULST Elly	1959-06-09	NEDNED	243.63	513.97	0.948032
VASILYEVA Lyudmila	20 OCT 1969	RUSRUS	242.45	532.98	0.90979
WAITZ Grete	01 OCT 1953	NORNOR	240.55	511.75	0.940107
WEIGHTMAN Laura	1991-07-01	GBRGBR	240.09	506.07	0.948841
WEYERMANN Anita	08 DEC 1977	SUISUI	238.2	515.83	0.92356
WYETH Alison	26 MAY 1964	GBRGBR	243.17	518.42	0.93812
YAPEYEVA Nina	1956-01-03	URSURS	245.2	520.4	0.942352
YATSINSKA Vesela	1951-01-16	BULBUL	244.7	532.89	0.918388
YEGOROVA Olga	28 MAR 1972	RUSRUS	239.47	503.26	0.951675
YORDANOVA Daniela	08 MAR 1976	BULBUL	239.1	510.59	0.936564
YUSHINA Alla	1958-08-20	URSURS	240.26	514.02	0.934827
ZADOROZHNAYA Yelena	03 DEC 1977	RUSRUS	239.94	505.4	0.949505
ZAKHAROVA Galina	1956-09-07	URSURS	237.72	513.4	0.926062
ZAUBER Angelika	1958-11-05	GDRGDR	239.9	529.61	0.90595
ZAYTSEVA Zamira	1953-02-16	URSURS	236.14	515.74	0.915733
ZHURAVLYOVA Olga	1956	URSURS	242.33	532.2	0.910673

## Sheet: 3000-5000
name, first name	date of birth	nation	sec 3000m	sec 5000m	KsA
ABEYLEGESSE Elvan	1982-09-11	TURTUR	511.94	864.68	0.986762
AGAFONOVA Kseniya	04 MAR 1983	RUSRUS	533.3	906.98	0.979992
ALEKSANDROVA Galina	15 OCT 1975	RUSRUS	527.9	909.61	0.967264
APLACHKINA Svetlana	1992-11-28	ANAANA	519.95	922.14	0.939752
ARTYOMOVA Natalya	1963-01-05	URSURS	511.67	894.08	0.953811
AUGUSTO Jessica	1981-11-08	PORPOR	521.53	877.07	0.991046
BAHTA Meraf	1989-06-24	SWESWE	517.5	889.95	0.969156
BALSAMO Agata	1970-11-11	ITAITA	535.03	914.7	0.974873
BASTOS Marina	1971-07-07	PORPOR	518.13	907.29	0.95179
BATTOCLETTI Nadia	2000-04-12	ITAITA	530.66	881.3	1.00356
BELETE Almenesh	1989-07-26	BELBEL	531.7	910.24	0.973553
BELKACEM Yamna	1974-02-20	FRAFRA	518.13	887.79	0.972696
BENTHAMI-GHEZIELLE Bouchra	19 MAY 1979	FRAFRA	515.41	912.17	0.941729
BITZNER-DUCRET Blandine	01 DEC 1965	FRAFRA	533.99	913.96	0.973766
BLEASDALE Julia	1981-09-09	GBRGBR	526.38	902	0.972616
BOGOMOLOVA Galina	15 OCT 1977	RUSRUS	522.03	899.72	0.967023
BOLTZ Jill	14 OCT 1966	GBRGBR	527.36	909.98	0.965882
BONDARCHUK Irina	1952-09-17	URSURS	522.84	912.62	0.954833
BONDARENKO Olga	1960-06-02	URSURS	513.99	895.76	0.956339
BORISOVA Lyudmila	1966-08-03	RUSRUS	520.78	912.52	0.951175
BRUNET Roberta	20 MAY 1965	ITAITA	515.65	884.5	0.971641
BUDD Zola	26 MAY 1966	GBRGBR	508.83	888.07	0.954936
BURKARD Elena	1992-02-10	GERGER	520.46	912.17	0.950956
BUTLER Kathy	22 OCT 1973	GBRGBR	520.97	905.51	0.958889
CALVIN Clémence	17 MAY 1990	FRAFRA	533.2	907.58	0.979161
CAN Yasemin	11 DEC 1996	TURTUR	513.29	876.82	0.975666
CAUNE Agate	2004-08-07	LATLAT	519.78	912.94	0.948912
CHECA Dolores	27 DEC 1982	ESPESP	517.78	886.3	0.973673
CHOJECKA Lidia	1977-01-25	POLPOL	511.69	904.88	0.942464
CHURBANOVA Olga	1965-07-16	RUSRUS	520.48	921.36	0.941507
CLARKE Rosie	1991-11-17	GBRGBR	531.02	919.75	0.962254
CLITHEROE Helen	1974-01-02	GBRGBR	531.82	906.75	0.97752
COURTNEY-BRYANT Melissa	1993-08-30	GBRGBR	519.2	893.82	0.968129
CULLEN Mary Teresa	1982-08-17	IRLIRL	528.17	919.04	0.957829
CUNHA Aurora	31 MAY 1959	PORPOR	526.37	906.96	0.967279
DA FONSECA-WOLLHEIM Kristina	1972-02-10	GERGER	517.3	898.43	0.959637
DANDOLO Nadia	1962-09-11	ITAITA	524.36	911.64	0.958639
DEJAEGHERE Veerle	1973-08-01	BELBEL	529.31	919.73	0.959176
DIAS Maria Albertina	1965-04-26	PORPOR	523.08	905.12	0.963187
DOMÍNGUEZ Marta	1975-11-03	ESPESP	508.8	888.33	0.9546
DOMORADSKAYA Anna	1953-11-17	URSURS	530.66	919	0.962387
DUBROVA Marina	09 DEC 1978	UKRUKR	530.34	902.73	0.979141
DUQUENOY Laurence	1969-09-29	FRAFRA	531.97	924.03	0.959511
ENGLISH Una	1970-08-14	IRLIRL	534.73	919.12	0.969641
FATES Farida	1962-02-02	FRAFRA	526.04	916.41	0.956704
FERNÁNDEZ Nuria	1976-08-16	ESPESP	518.05	924.17	0.934262
FIDATOV Elena	1960-07-24	ROUROU	521.98	912.58	0.953305
FRANKIEWICZ Wioletta	1977-06-09	POLPOL	524.22	908.38	0.961822
FUDGE Paula	30 MAR 1952	GBRGBR	528.74	914.51	0.963613
GALYAMOVA Nadezhda	1959-07-22	URSURS	532.39	924.65	0.959624
GARCÍA Marta	1998-01-01	ESPESP	531.04	917.1	0.965071
GARGANO Margherita	1952-11-18	ITAITA	526.31	920.94	0.952487
GEGA Luiza	1988-11-05	ALBALB	526.61	916.47	0.957678
GHICAN Viorica	1965-06-09	ROUROU	522.39	909.9	0.956863
GRIGORYEVA Lidiya	1974-01-21	RUSRUS	525.73	917.21	0.955306
GRØVDAL Karoline Bjerkeli	1990-06-14	NORNOR	513.47	871.07	0.982451
GUIDA Maria	1966-01-23	ITAITA	534.59	898.84	0.991259
GUSKOVA Svetlana	1957-08-19	URSURS	509.36	902.12	0.941043
HARVEY Natalie Anne	1975-01-19	GBRGBR	533.63	914.08	0.972982
HASSAN Sifan	1993-01-01	NEDNED	498.49	853.42	0.973514
IVANOVA Marina	1983-06-30	RUSRUS	533.56	914.57	0.972333
JAVORNIK Helena	26 MAR 1966	SLOSLO	530.71	915.4	0.966262
JUDD Jess	1995-01-07	GBRGBR	532.73	897.19	0.989627
KARLSHØJ Gitte	14 MAY 1959	DENDEN	524.35	922.95	0.946873
KAZANKINA Tatyana	17 DEC 1951	URSURS	502.62	923.12	0.907466
KEITH Megan	2002-04-23	GBRGBR	532.51	896.98	0.98945
KLEIN Hanna	1993-04-06	GERGER	525	891.71	0.981261
KLOSTERHALFEN Konstanze	1997-02-18	GERGER	500.07	866.76	0.96157
KOBA Tamara	1957-02-24	URSURS	527.99	920.97	0.955496
KOENS Grete	26 MAY 1967	NEDNED	533.01	920.91	0.964644
KOROBKINA Yelena	1990-11-25	RUSRUS	531	914.67	0.967562
KOSTER Maureen	1992-07-03	NEDNED	515.93	887.52	0.968861
KRISTIANSEN Ingrid	21 MAR 1956	NORNOR	514.1	877.33	0.976637
KRUMINS Susan	1986-07-08	NEDNED	514.41	891.25	0.961964
LAHTI Sarah	1995-02-18	SWESWE	530.97	904.87	0.977986
LEHMANN-VEITH Gabriele	24 OCT 1956	GDRGDR	532.6	921.9	0.962867
LLADO Josianne	1974-11-27	FRAFRA	529.98	911.26	0.969317
LOKAR Claudia	1964-02-09	GERGER	523.11	907.62	0.960589
LOZANO Ana	1991-02-22	ESPESP	534.95	914.23	0.975229
LUKAN Klara	2000-09-08	SLOSLO	527.17	901.37	0.974757
MAAMA-YVELAIN Fatima	31 DEC 1969	FRAFRA	523.53	898.18	0.971465
MACHADO Mariana	2000-11-12	PORPOR	529.09	915.56	0.963145
MAGNANI Margherita	1987-02-26	ITAITA	531.82	925.44	0.957779
MARKOVC Amy-Eloise	1995-08-05	GBRGBR	520.32	896.6	0.967209
MATVEYEVA Lyudmila	1957-02-01	URSURS	532.49	916.27	0.968583
MCCAMBRIDGE Maria	1975-07-10	IRLIRL	530.4	905.86	0.975868
MCCOLGAN Eilish	1990-11-25	GBRGBR	511	868.55	0.980561
MCCOLGAN Liz	24 MAY 1964	GBRGBR	518.23	899.56	0.960155
MCKIERNAN Catherina	1969-11-30	IRLIRL	531.33	889.4	0.995671
MIKITENKO Irina	1972-08-23	GERGER	510.39	882.03	0.964423
MIŠMAŠ ZRIMŠEK Maruša	24 OCT 1994	SLOSLO	526.44	908.12	0.966172
MOCKENHAUPT Sabrina	06 DEC 1980	GERGER	524.65	899.88	0.971704
MØLLER Anna Emilie	1997-07-28	DENDEN	527.83	907.7	0.969171
MONTEIRO Inês	18 MAY 1980	PORPOR	532.47	901.06	0.984896
MOREIRA Sara	17 OCT 1985	PORPOR	522.69	894.71	0.973667
MOROIANU Rodica Daniela	1970-11-18	FRAFRA	533.16	917.31	0.968702
MUIR Laura	09 MAY 1993	GBRGBR	510.53	888.14	0.958051
MURCIA Rosario	1964-09-23	FRAFRA	532.2	925.33	0.958577
MURRAY Yvonne	04 OCT 1964	GBRGBR	509.02	896.94	0.945846
NAUER Daria	21 MAY 1966	SUISUI	534.53	913.93	0.974783
NENASHEVA Viktoriya	1970-06-28	RUSRUS	526.02	895.82	0.978656
OLAFSSON Loa	1958-01-29	DENDEN	522.3	908.8	0.957857
O'SULLIVAN Sonia	1969-11-28	IRLIRL	501.64	881.02	0.948976
PAPP Krisztina	17 DEC 1982	HUNHUN	524.49	908.65	0.962032
PAVEY Joanne	1973-09-20	GBRGBR	511.27	879.96	0.968358
PIPPIG Uta	1965-09-07	GERGER	520.99	904.87	0.959604
PLIŚ Renata	1985-02-05	POLPOL	519.18	918.75	0.941823
POLUŠKINA Inna	1984-07-07	LATLAT	530.69	922.43	0.958862
POPKOVA Natalya	1988-09-21	RUSRUS	525.1	905.95	0.966021
POZDNYAKOVA Tetyana	04 MAR 1956	URSURS	512	916.37	0.93121
PROKOPČUKA Jeļena	1976-09-21	LATLAT	522.86	887.71	0.981664
PUICĂ Maricica	1950-07-29	ROUROU	507.83	906.04	0.934157
PUMPER Susanne	1970-09-01	AUTAUT	527.04	910.54	0.964702
RADCLIFFE Paula	17 DEC 1973	GBRGBR	502.2	869.11	0.963054
REA Elisa	23 MAR 1968	ITAITA	528.76	926.5	0.951178
RIBEIRO Fernanda	1969-06-23	PORPOR	510.66	876.45	0.971077
RODCHENKOVA Marina	1961-07-30	URSURS	525.69	919.26	0.953104
ROMANOVA Yelena	20 MAR 1963	URSURS	510.45	899.7	0.945593
ROOMS Lisa	1996-06-17	BELBEL	534.64	926.27	0.961995
RUTTO Stella	12 DEC 1996	ROUROU	527.36	906.93	0.96913
SALPETER Lonah Chemtai	12 DEC 1988	ISRISR	522.88	899.02	0.969352
SAMITOVA-GALKINA Gulnara	1978-07-09	RUSRUS	522.96	873.13	0.998248
SANDELL Annemari	1977-01-02	FINFIN	528.36	896.22	0.982571
SERGENT-PALLUY Annette	1962-11-17	FRAFRA	524.19	916.44	0.953308
SHOBUKHOVA Liliya	1977-11-13	RUSRUS	514.85	863.75	0.993439
SIPATOVA Yelena	1955-06-07	URSURS	513.53	924.6	0.92568
SLY Wendy	1959-11-05	GBRGBR	517.06	921.45	0.935229
SOMMAGGIO Silvia	1969-11-20	ITAITA	530.3	920.89	0.95976
SOROKOVSKAYA Natalya	1962-07-23	URSURS	528.2	916.83	0.960193
STAVIK Hilde	1962-09-06	NORNOR	527.47	922.77	0.952693
SULTANOVA-ZHDANOVA Firaya	1961-04-29	URSURS	534.62	913.46	0.975449
SZABO Gabriela	1975-11-14	ROUROU	501.42	871.48	0.958943
SZENTGYÖRGYI Katalin	1979-01-01	HUNHUN	512.7	902	0.947339
THACKERY Calli	1993-01-09	GBRGBR	528.1	902.55	0.9752
TIKKANEN Päivi	1960-01-19	FINFIN	521.3	915.76	0.948757
TOMASHOVA Tatyana	1975-07-01	RUSRUS	505.56	879.22	0.958349
TOOBY Angela	24 OCT 1960	GBRGBR	527.59	913.22	0.962875
TOONSTRA Christine	1966-06-22	NEDNED	525.96	907.68	0.965759
TURAVA Alesia	06 DEC 1979	BLRBLR	512.89	923.84	0.925286
TWELL Stephanie	1989-08-17	GBRGBR	520.98	894.08	0.971166
ULMASOVA Svetlana	1953-02-04	URSURS	506.78	905.5	0.932781
VAN ES Diane	22 MAR 1999	NEDNED	529.55	907.52	0.972522
VAN HULST Elly	1959-06-09	NEDNED	513.97	917.08	0.93407
VAQUERO Julia	1970-09-18	ESPESP	521.23	884.95	0.981656
VASILYEVA Yuliya	23 MAR 1987	RUSRUS	531.62	920.41	0.962651
VASTENBURG Jip	21 MAR 1994	NEDNED	529.5	915.77	0.96367
VOLKOVA Yekaterina	1978-02-16	RUSRUS	534.64	900.02	0.990052
VYAZOVA Yelena	1960-04-18	URSURS	518.1	923.25	0.935283
WAGNER-GYÜRKÉS Viktória	15 OCT 1992	HUNHUN	528.83	914.24	0.964061
WAITZ Grete	01 OCT 1953	NORNOR	511.75	908.8	0.938509
WALKER Eloise	27 MAY 2001	GBRGBR	529.56	925.21	0.953946
WEDLUND Sara	27 DEC 1975	SWESWE	528.87	906.9	0.971937
WEIGHTMAN Laura	1991-07-01	GBRGBR	506.07	875.44	0.963458
WEISSTEINER Silvia	1979-07-13	ITAITA	528.63	902.65	0.97607
WESSEL Kathrin	1967-08-14	GDRGDR	524.81	898.71	0.973265
WEYERMANN Anita	08 DEC 1977	SUISUI	515.83	899.28	0.956006
WHITTLE Laura	1985-06-27	GBRGBR	530.37	908.58	0.972892
WIGENE Susanne	1978-02-12	NORNOR	520.23	888.53	0.975825
WYETH Alison	26 MAY 1964	GBRGBR	518.42	900.37	0.959643
YEGOROVA Olga	28 MAR 1972	RUSRUS	503.26	869.32	0.964854
YORDANOVA Daniela	08 MAR 1976	BULBUL	510.59	896.95	0.948752
ZADOROZHNAYA Yelena	03 DEC 1977	RUSRUS	505.4	880.47	0.956686
ZHILYAYEVA Alla	1969-02-05	RUSRUS	527.46	899.46	0.977364

## Sheet: 5000-10000
name, first name	date of birth	nation	sec 5000m	sec 10,000m	KsA
ABEYLEGESSE Elvan	1982-09-11	TURTUR	864.68	1821.67	0.949327
ABITOVA Inga	06 MAR 1982	RUSRUS	915.05	1831.42	0.999279
AGAFONOVA Kseniya	04 MAR 1983	RUSRUS	906.98	1868.53	0.970795
ALEKSANDROVA Galina	15 OCT 1975	RUSRUS	909.61	1931.52	0.941859
ARTYOMOVA Natalya	1963-01-05	URSURS	894.08	1916.33	0.933117
ARYASOVA Tatyana	1979-04-02	RUSRUS	915.4	1864.88	0.981725
AUGUSTO Jessica	1981-11-08	PORPOR	877.07	1879.15	0.933475
AVERY Kate	10 OCT 1991	GBRGBR	925.63	1901.44	0.973609
BAHTA Meraf	1989-06-24	SWESWE	889.95	1868.05	0.952812
BALSAMO Agata	1970-11-11	ITAITA	914.7	1916.49	0.954558
BARRACHINA FERNANDEZ Gemma	1986-04-10	ESPESP	925.88	1914.64	0.967158
BASTOS Marina	1971-07-07	PORPOR	907.29	1901.38	0.954349
BATTOCLETTI Nadia	2000-04-12	ITAITA	881.3	1866.42	0.944375
BELETE Almenesh	1989-07-26	BELBEL	910.24	1903.05	0.956612
BERKUT Nataliya	30 MAY 1975	UKRUKR	899.26	1868.89	0.962347
BIBA-PÖSCHL Iris	27 MAY 1964	GERGER	926.24	1912.09	0.968825
BIKTASHEVA Lyudmila	1974-07-25	RUSRUS	922.98	1864	0.990322
BITZNER-DUCRET Blandine	01 DEC 1965	FRAFRA	913.96	1913.38	0.955336
BLEASDALE Julia	1981-09-09	GBRGBR	902	1855.63	0.972177
BOBOCEL Ancuţa	03 OCT 1987	ROUROU	916.13	1903.12	0.962766
BOGOMOLOVA Galina	15 OCT 1977	RUSRUS	899.72	1826.2	0.985347
BOLTZ Jill	14 OCT 1966	GBRGBR	909.98	1867.88	0.974345
BONDARENKO Olga	1960-06-02	URSURS	895.76	1857.21	0.96463
BOTEZAN-PRUNDUS Mihaela Maria	1976-11-21	ROUROU	908.78	1871.24	0.971313
BRITTON Fionnula	1984-09-24	IRLIRL	912.97	1889.22	0.966505
BRUNET Roberta	20 MAY 1965	ITAITA	884.5	1932.13	0.91557
BUTLER Kathy	22 OCT 1973	GBRGBR	905.51	1896.9	0.954726
CALVIN Clémence	17 MAY 1990	FRAFRA	907.58	1912.86	0.948925
CAN Yasemin	11 DEC 1996	TURTUR	876.82	1826.41	0.960157
CAUNE Agate	2004-08-07	LATLAT	912.94	1915.79	0.953069
CHECA Dolores	27 DEC 1982	ESPESP	886.3	1942.21	0.912672
CLITHEROE Helen	1974-01-02	GBRGBR	906.75	1931.29	0.93901
CULLEN Mary Teresa	1982-08-17	IRLIRL	919.04	1941.42	0.946771
CUNHA Aurora	31 MAY 1959	PORPOR	906.96	1889.41	0.960046
DANDOLO Nadia	1962-09-11	ITAITA	911.64	1922.37	0.948454
DATTKE Miriam	1998-06-24	GERGER	922.03	1870.21	0.986018
DAUNAY Christelle	05 DEC 1974	FRAFRA	924.48	1895.81	0.975288
DAVENPORT-MCMAHON Marie	1975-01-24	IRLIRL	909.07	1888.78	0.9626
DE VOS Nathalie	09 DEC 1982	BELBEL	922.68	1882.8	0.980115
DENNEHY-WILLIS Breeda	1970-02-02	IRLIRL	912.83	1931.3	0.945301
DIAS Ana	1974-01-15	PORPOR	926.41	1899.52	0.975415
DIAS Maria Albertina	1965-04-26	PORPOR	905.12	1893.03	0.956266
DOMÍNGUEZ Marta	1975-11-03	ESPESP	888.33	1851.69	0.95948
DOMORADSKAYA Anna	1953-11-17	URSURS	919	1908.23	0.963196
EJJAFINI Nadia	1977-11-08	ITAITA	916.54	1905.14	0.962176
FATES Farida	1962-02-02	FRAFRA	916.41	1918.63	0.955275
FAZLITDINOVA Gulshat	1992-08-28	RUSRUS	918.88	1921.83	0.956255
FÉLIX Dulce	23 OCT 1982	PORPOR	908.02	1879.03	0.966477
FRANKIEWICZ Wioletta	1977-06-09	POLPOL	908.38	1936.27	0.938278
GALYAMOVA Nadezhda	1959-07-22	URSURS	924.65	1923.07	0.961639
GEGA Luiza	1988-11-05	ALBALB	916.47	1936.25	0.946644
GHICAN Viorica	1965-06-09	ROUROU	909.9	1878.18	0.968917
GRIGORYEVA Lidiya	1974-01-21	RUSRUS	917.21	1832.72	1.00093
GRØVDAL Karoline Bjerkeli	1990-06-14	NORNOR	871.07	1850.84	0.94127
GRUCA Dorota	05 DEC 1970	POLPOL	918.75	1912.11	0.96098
GUIDA Maria	1966-01-23	ITAITA	898.84	1887.82	0.952252
GUSKOVA Svetlana	1957-08-19	URSURS	902.12	1902.43	0.948387
HALLE-HAUGEN Gunhild	1972-06-01	NORNOR	909	1907.89	0.952885
HARRISON Samantha	1995-02-01	GBRGBR	922.29	1871.4	0.985668
HARVEY Natalie Anne	1975-01-19	GBRGBR	914.08	1934.01	0.945269
HASSAN Sifan	1993-01-01	NEDNED	853.42	1746.82	0.977113
IAKOVOU Chrysostomia	1971-04-09	GREGRE	915.32	1938.62	0.944301
INGLESE Veronica	1990-11-22	ITAITA	922.45	1897.43	0.972315
INGLIS Sarah	1991-08-28	GBRGBR	905.51	1899.6	0.953369
IVANOVA Marina	1982-01-19	RUSRUS	914.57	1879.54	0.973185
JAVORNIK Helena	26 MAR 1966	SLOSLO	915.4	1866.63	0.980805
JEVTIĆ Olivera	1977-07-24	YUGYUG	911.25	1889.65	0.964464
JUDD Jess	1995-01-07	GBRGBR	897.19	1835.93	0.977368
KÁLOVICS Anikó	13 MAY 1977	HUNHUN	910.21	1900.31	0.957959
KARLSHØJ Gitte	14 MAY 1959	DENDEN	922.95	1946.25	0.948439
KASHAPOVA Klara	1970-01-29	RUSRUS	918.09	1915.99	0.958345
KIPLAGAT Lornah	01 MAY 1974	NEDNED	896.43	1812.53	0.989148
KLIMINA Viktoriya	01 MAR 1976	RUSRUS	895.55	1873.5	0.956018
KLOSTERHALFEN Konstanze	1997-02-18	GERGER	866.76	1861.71	0.931144
KONOVALOVA Mariya	1974-08-14	RUSRUS	878.09	1831.03	0.959121
KOROBKINA Yelena	1990-11-25	RUSRUS	914.67	1936.01	0.944902
KRAVTSOVA Olga	1981-07-25	BLRBLR	887.75	1918.52	0.925453
KRISTIANSEN Ingrid	21 MAR 1956	NORNOR	877.33	1813.74	0.967426
KRUMINS Susan	1986-07-08	NEDNED	891.25	1865.4	0.955559
LAHTI Sarah	1995-02-18	SWESWE	904.87	1871.12	0.967196
LEHMANN-VEITH Gabriele	24 OCT 1956	GDRGDR	921.9	1937.22	0.951776
LOKAR Claudia	1964-02-09	GERGER	907.62	1917.9	0.946473
MAAMA-YVELAIN Fatima	31 DEC 1969	FRAFRA	898.18	1903.29	0.943818
MARKOVC Amy-Eloise	1995-08-05	GBRGBR	896.6	1877.81	0.954942
MARTIN Jessica	01 OCT 1992	GBRGBR	924.02	1895.92	0.974746
MATVEYEVA Lyudmila	1957-02-01	URSURS	916.27	1898.02	0.965501
MAURY Margaret	15 MAY 1974	FRAFRA	883.9	1921.01	0.920245
MCCOLGAN Eilish	1990-11-25	GBRGBR	868.55	1800.86	0.964595
MCCOLGAN Liz	24 MAY 1964	GBRGBR	899.56	1857.07	0.968795
MCKIERNAN Catherina	1969-11-30	IRLIRL	889.4	1868.41	0.952039
MELLY Joan Chelimo	1990-11-10	ROUROU	903.6	1910.52	0.94592
MIKITENKO Irina	1972-08-23	GERGER	882.03	1889.55	0.933587
MOCKENHAUPT Sabrina	06 DEC 1980	GERGER	899.88	1874.21	0.960277
MONTEIRO Inês	18 MAY 1980	PORPOR	901.06	1873.58	0.961859
MOREIRA Sara	17 OCT 1985	PORPOR	894.71	1872.93	0.955412
MOROIANU Rodica Daniela	1970-11-18	FRAFRA	917.31	1947.81	0.941889
MURCIA Rosario	1964-09-23	FRAFRA	925.33	1902.83	0.972583
MURRAY Yvonne	04 OCT 1964	GBRGBR	896.94	1916.97	0.935789
NADOLSKA Karolina	1981-09-06	POLPOL	925.52	1903.51	0.972435
NAGOVITSYNA Yelena	07 DEC 1982	RUSRUS	902.8	1922.99	0.938954
NAUER Daria	21 MAY 1966	SUISUI	913.93	1895.96	0.964082
OCKENDEN Verity	1991-08-31	GBRGBR	903.51	1903.7	0.949215
OLAFSSON Loa	1958-01-29	DENDEN	908.8	1905.4	0.95392
OLTEANU-NEGURA Iulia	1967-01-26	ROUROU	906.73	1860.25	0.974847
OPPLIGER Martine	19 OCT 1957	SUISUI	925.84	1927.49	0.960669
O'SULLIVAN Sonia	1969-11-28	IRLIRL	881.02	1847.59	0.953696
PAPP Krisztina	17 DEC 1982	HUNHUN	908.65	1906.47	0.953228
PAVEY Joanne	1973-09-20	GBRGBR	879.96	1853.2	0.949665
PETROVA Lyudmila	07 OCT 1968	RUSRUS	920.44	1896.76	0.970539
PIPPIG Uta	1965-09-07	GERGER	904.87	1881.36	0.961932
POPKOVA Natalya	1988-09-21	RUSRUS	905.95	1915.83	0.945752
POZDNYAKOVA Tetyana	04 MAR 1956	URSURS	916.37	1908.94	0.960083
PROKOPČUKA Jeļena	1976-09-21	LATLAT	887.71	1838.78	0.965542
PROKOPEVA Alina	1985-08-16	RUSRUS	923.78	1917.38	0.963586
PUCHKOVA Natalya	1987-01-28	RUSRUS	924	1922.67	0.961163
PUMPER Susanne	1970-09-01	AUTAUT	910.54	1932.33	0.942427
PURDUE Charlotte	1991-06-10	GBRGBR	923.4	1923.55	0.9601
RADCLIFFE Paula	17 DEC 1973	GBRGBR	869.11	1801.09	0.965093
RECIO Teresa	1963-07-07	ESPESP	912.06	1903.8	0.958147
REH Alina	23 MAY 1997	GERGER	904.1	1879.87	0.961875
RENDERS Marleen	24 DEC 1968	BELBEL	919.2	1863.6	0.986478
RIBEIRO Fernanda	1969-06-23	PORPOR	876.45	1822.88	0.96161
RICHARDSSON Camilla	1993-09-14	FINFIN	911.63	1872.78	0.973558
ROMANOVA Yelena	20 MAR 1963	URSURS	899.7	1906.83	0.94366
ROSA Mónica	05 MAY 1978	PORPOR	921.01	1942.25	0.948395
RUIZ Cristina	1999-01-16	ESPESP	925.11	1928.7	0.959309
SALPETER Lonah Chemtai	12 DEC 1988	ISRISR	899.02	1846.37	0.973824
SAMOKHVALOVA Alena	1980-11-21	RUSRUS	915.75	1872.57	0.978068
SANDELL Annemari	1977-01-02	FINFIN	896.22	1900.42	0.943181
SANTIAGO SÁNCHEZ Beatriz	28 OCT 1968	ESPESP	911.01	1932.6	0.942782
SCHÄFER Monika	06 OCT 1959	GERGER	923.46	1947.89	0.948164
SERGENT-PALLUY Annette	1962-11-17	FRAFRA	916.44	1911.68	0.95878
SHOBUKHOVA Liliya	1977-11-13	RUSRUS	863.75	1829.36	0.944319
SIPATOVA Yelena	1955-06-07	URSURS	924.6	1937.2	0.954574
SKVORTSOVA Silviya	1974-11-16	RUSRUS	917.35	1941.89	0.944801
SLEGERS Lieve	1965-04-06	BELBEL	916.1	1903.36	0.962613
SLY Wendy	1959-11-05	GBRGBR	921.45	1913.36	0.963175
SOKOLOVA Yelena	27 DEC 1979	RUSRUS	918.01	1909.47	0.961534
SOMMAGGIO Silvia	1969-11-20	ITAITA	920.89	1884.12	0.977528
SOROKOVSKAYA Natalya	1962-07-23	URSURS	916.83	1906.43	0.961829
SZENTGYÖRGYI Katalin	1979-01-01	HUNHUN	902	1947.69	0.926225
TECUŢĂ-GHERASIM Camelia Alina	1971-11-10	ROUROU	923.43	1908.28	0.967814
TEFERI Selamawit	24 MAR 1994	ISRISR	893.43	1879.5	0.95071
TESKE Charlotte	1949-11-23	FRGFRG	919.54	1920.26	0.957724
TIKKANEN Päivi	1960-01-19	FINFIN	915.76	1905.02	0.961418
TOOBY Angela	24 OCT 1960	GBRGBR	913.22	1915.3	0.953605
TOONSTRA Christine	1966-06-22	NEDNED	907.68	1903.55	0.953671
TWELL Stephanie	1989-08-17	GBRGBR	894.08	1868.13	0.957192
ULMASOVA Svetlana	1953-02-04	URSURS	905.5	1934.83	0.936
VAN ES Diane	22 MAR 1999	NEDNED	907.52	1862.24	0.974654
VAQUERO Julia	1970-09-18	ESPESP	884.95	1874.51	0.944193
VASTENBURG Jip	21 MAR 1994	NEDNED	915.77	1895.48	0.966267
VERÉBNÉ FAZEKAS Erika	23 OCT 1963	HUNHUN	923.54	1934.5	0.95481
VICECONTE Maura	03 OCT 1967	ITAITA	918.8	1865.57	0.985007
VYAZOVA Yelena	1960-04-18	URSURS	923.25	1869.4	0.98775
WASSILUK Petra	27 OCT 1969	GERGER	915.17	1912.2	0.957191
WEISSTEINER Silvia	1979-07-13	ITAITA	902.65	1929.26	0.935747
WESSEL Kathrin	1967-08-14	GERGER	898.71	1863.62	0.964478
WIGENE Susanne	1978-02-12	NORNOR	888.53	1832.36	0.96982
WOLDU Mekdes	20 OCT 1992	FRAFRA	918.77	1931.72	0.951246
YELLING Hayley	1974-01-03	GBRGBR	916.44	1905.14	0.962071
ZHILYAYEVA Alla	1969-02-05	RUSRUS	899.46	1823.07	0.986753
