# Supplementary material for: Sex-specific characteristics of special endurance and performance potential in female runners
Source: BMC Res Notes. 2025 Apr 26;18:196. doi: 10.1186/s13104-025-07256-6 (PMC12032771; doi:10.1186/s13104-025-07256-6)
Supplement: Supplementary file 6 — Supplementary Material 6 [file 13104_2025_7256_MOESM6_ESM.xlsx]

## Sheet: Tabelle1
name	first name	age	sec 1500m	placement 1500m	sec 3000m	placement 3000m	KsA value	year
Kraus	Brigitte	24	246.62	1	566.2	9	0.871141	1980
Friedmann	Birgit	20	246.64	2	528.05	1	0.934154	1980
Steiert	Vera	22	253.07	4	556	6	0.910324	1980
Heuing	Mathilde	28	255.85	6	555.9	5	0.920489	1980
Weiß	Sabine	23	258.67	7	574.7	21	0.900191	1980
Teske	Charlotte	31	259.3	8	538.94	3	0.962259	1980
Theuss	Bianca	20	259.89	9	567.21	11	0.91638	1980
Hofmann	Elvira	19	261.4	10	555.1	4	0.941812	1980
Franzis	Elisabeth	18	263.1	13	572.5	18	0.919127	1980
Finke	Christiane	18	263.25	14	557.88	7	0.943751	1980
Deselaers	Ines	17	263.78	16	582.6	29	0.905527	1980
Joos	Jutta	20	263.85	17	565	8	0.933982	1980
Mödl	Maria	26	264.2	19	566.9	10	0.932087	1980
Böker	Steffi	23	264.37	20	583.9	30	0.905532	1980
Maiwald	Ines	23	264.6	21	569.2	14	0.929726	1980
Mai	Christina	19	264.61	22	569.25	15	0.929679	1980
Nolte	Ulrike	22	264.82	23	581.2	27	0.911287	1980
Lehmann	Eva-Maria	22	265.7	25	571.4	17	0.929996	1980
Kraus	Brigitte	25	245.47	1	556.6	5	0.882034	1981
Friedmann	Birgit	21	248.25	3	532.95	2	0.931607	1981
Steiert	Vera	23	249.32	5	532.27	1	0.936818	1981
Teske	Charlotte	32	254.38	7	545.39	4	0.932837	1981
Heuing	Mathilde	29	254.67	8	563.08	9	0.904561	1981
Schulz	Gudrun	21	256.13	9	560.87	7	0.913331	1981
Lehmann	Eva-Maria	23	257.5	11	561.48	8	0.917219	1981
Franzis	Elisabeth	19	260.16	13	566.03	12	0.919245	1981
Wessinghage	Ellen	33	262.29	17	536.77	3	0.97729	1981
Büngener	Bettina	22	262.58	18	584.5	29	0.898477	1981
Finke	Christiane	19	263.06	19	570.3	15	0.922532	1981
Petersen	Birgit	19	263.13	20	568.17	14	0.926237	1981
Micus	Anja	18	263.31	21	584	25	0.901747	1981
Jooß	Jutta	21	264.68	23	563.22	10	0.939881	1981
Mödl	Maria	24	265.23	24	584.14	26	0.908104	1981
Peters	Christiane	18	265.73	26	580.69	21	0.915222	1981
Schäfer	Monika	22	266.28	29	577.76	19	0.921767	1981
Hutterer	Heidi	22	266.3	30	557.96	6	0.954549	1981
Friedmann	Birgit	22	245.9	1	523.65	1	0.939177	1982
Kraus	Brigitte	26	247.72	2	524.43	2	0.944721	1982
Krott	Martina	24	248.19	3	568.32	13	0.873416	1982
Weiß	Sabine	25	256.27	7	559.99	7	0.915266	1982
Teske	Charlotte	33	258.7	8	540.6	3	0.957085	1982
Michallek	Vera	24	259.08	9	554.94	5	0.933723	1982
Franzis	Elisabeth	20	259.74	10	554.1	4	0.93752	1982
Peters	Christiane	19	262.11	14	577.38	18	0.907929	1982
Henseler	Ingrid	29	263.11	16	580.76	21	0.906089	1982
Lindner	Helma	22	263.13	17	575.58	15	0.914313	1982
Petersen	Birgit	20	262.72	15	582.5	24	0.902043	1982
Rehmet	Barbara	20	264.04	20	582.17	23	0.907089	1982
Wulsch	Sigrid	29	264.6	22	575.15	14	0.920108	1982
Mai	Christina	21	264.7	23	560.27	8	0.944902	1982
Schnuch	Sabine	19	265.05	26	577.14	17	0.918495	1982
Bennett	Susanne	28	266.06	28	566.65	11	0.939063	1982
Lehmann	Eva-Maria	24	266.6	30	583.8	29	0.913326	1982
Büngener	Simone	20	255.62	6	577.5	19	0.885264	1982
Kraus	Brigitte	27	242.42	1	515.11	1	0.941236	1983
Michallek	Vera	25	251.91	5	532.67	2	0.945839	1983
Franzis	Elisabeth	21	252.7	6	545.7	5	0.92615	1983
Schäfer	Monika	24	253.11	7	544.05	4	0.930466	1983
Schmidt	Birgit	20	253.23	8	563	10	0.899574	1983
Teske	Charlotte	34	257.05	9	538.05	3	0.955487	1983
Wölm	Christiane	18	257.53	10	565.04	14	0.911546	1983
Wulsch	Sigrid	30	258.21	11	564.8	13	0.914341	1983
Jahnsen	Frieda	18	259.7	12	563.68	11	0.921445	1983
Böker	Steffi	26	259.8	13	559.62	8	0.928487	1983
Finke	Christiane	21	259.96	14	574.88	20	0.904397	1983
Deselaers	Ines	20	262.73	20	580.1	28	0.905809	1983
Manz	Veronika	24	263.15	21	569.7	17	0.92382	1983
Mai	Christina	22	263.35	22	558.28	7	0.943433	1983
Hofmann	Elvira	22	263.4	23	549.5	6	0.95869	1983
Kemper	Vera	30	263.68	24	566.16	15	0.931468	1983
Bens	Monika	17	264.1	25	579.2	26	0.911948	1983
Rehmet	Barbara	22	264.55	27	572.7	19	0.923869	1983
Maiwald	Ines	26	264.59	28	569.02	16	0.929985	1983
Lohr	Monika	20	256.74	30	571.6	18	0.898321	1983
Gerdes	Roswitha	21	244.41	1	534.6	2	0.914366	1984
Kraus	Brigitte	28	246	3	520.9	1	0.944519	1984
Michallek	Vera	28	246.25	4	534.62	3	0.921215	1984
Schmidt	Birgit	21	250.38	5	541.3	4	0.925106	1984
Wulsch	Sigrid	31	255.02	8	549.91	5	0.927497	1984
Franzis	Elisabeth	22	256.5	9	551.38	7	0.930393	1984
Borgschulze	Claudia	20	258.23	10	570.8	16	0.9048	1984
Jahnsen	Frieda	19	260.07	13	559.95	9	0.928904	1984
Finke	Christiane	22	261.17	14	550.13	6	0.949485	1984
Mai	Christina	23	262.81	16	557.95	8	0.942056	1984
Böker	Steffi	27	263.63	17	560.99	10	0.939874	1984
Neuhaus	Beatrix	23	263.7	18	578.3	25	0.911983	1984
Merten	Silvia	18	264.82	21	580.13	28	0.912968	1984
Schmidt	Astrid	21	265	23	562.67	11	0.941938	1984
Beck	Ulrike	23	266.52	27	573.34	20	0.92971	1984
Kraus	Brigitte	29	248.09	1	538.55	3	0.921326	1985
Schmidt	Birgit	22	252.32	2	532.39	1	0.947877	1985
Borgschulze	Claudia	21	254.88	3	548.29	7	0.929727	1985
Wulsch	Sigrid	32	256.93	4	540.15	4	0.951328	1985
Winkelmann	Antje	20	258.74	9	561.93	13	0.920898	1985
Schäfer	Monika	27	259	10	542.23	5	0.955314	1985
Weiß	Sabine	28	259.21	11	558.85	10	0.927655	1985
Teske	Charlotte	36	259.37	12	538.3	2	0.963663	1985
Jahnsen	Frieda	20	260.09	14	561.9	12	0.925752	1985
Vetter	Heidrun	24	260.29	15	567.2	23	0.917807	1985
Schlichterle	Susanne	24	260.44	16	569.22	27	0.915077	1985
Biba	Iris	21	261.19	19	556.71	9	0.938334	1985
Neuhaus	Beatrix	22	261.34	20	570.47	29	0.916227	1985
Mai	Christina	24	261.47	21	545.36	6	0.95889	1985
Beck	Ulrike	24	263.16	23	562.69	16	0.935364	1985
Schmidt	Astrid	22	263.3	24	562.12	22	0.936811	1985
Böker	Steffi	28	264.66	30	569.9	28	0.928795	1985
Schenk	Anette	19	259.85	13	567.59	24	0.915626	1985
Michaellek	Vera	28	244.29	1	530.99	2	0.92013	1986
Kraus	Brigitte	30	244.65	2	527.83	1	0.927003	1986
Schmidt	Birgit	23	248.19	3	558	15	0.88957	1986
Biba	Iris	22	252.07	4	534.99	3	0.942335	1986
Borgschulze	Claudia	22	253.94	7	544.58	7	0.932609	1986
Vetter	Heidrun	24	254.86	8	567.93	27	0.897505	1986
Eckhardt	Uta	19	255.07	9	564.53	20	0.903654	1986
Winkelmann	Antje	21	257.13	10	540.03	4	0.95228	1986
Beck	Ulrike	25	257.43	11	546.14	8	0.942725	1986
Pressler	Kerstin	24	257.91	13	551.39	10	0.93549	1986
Knetsch	Sabine	20	259.82	16	558.73	18	0.930038	1986
Weiß	Sabine	29	259.91	17	566.56	25	0.917502	1986
Mai	Christina	25	263.5	29	542.11	5	0.972127	1986
Kraus	Brigitte	31	245.23	1	544.1	9	0.901415	1987
Michallek	Vera	29	245.71	2	529.41	1	0.928241	1987
Borgschulze	Claudia	23	249.64	3	537.54	2	0.928824	1987
Kunkel	Sabine	23	255.07	5	538.54	5	0.947265	1987
Vetter	Heidrun	25	255.82	7	550.62	12	0.929207	1987
Winkelmann	Antje	22	256.09	8	540.63	7	0.947376	1987
Neuhaus	Beatrix	24	257.49	9	545.49	10	0.944069	1987
Wulsch	Sigrid	34	257.82	10	568.34	28	0.907274	1987
Beck	Ulrike	26	258.05	11	537.95	3	0.959383	1987
Eckhardt	Uta	20	260.09	13	562.1	21	0.925423	1987
Mai	Christina	26	260.58	15	540.18	6	0.96479	1987
Breitenbach	Anke	18	261.22	16	557.88	16	0.936474	1987
Jeorga	Carolin	18	261.73	17	559.08	18	0.936288	1987
Merten	Silvia	20	262.22	20	558.89	17	0.93836	1987
Pressler	Kerstin	25	263.1	22	538.26	4	0.977594	1987
Wirdemann	Meike	24	264.6	25	560.8	19	0.943652	1987
Wennemar	Sigrid	20	265.45	26	564.64	23	0.940245	1987
Breit	Elisabeth	23	265.48	27	565.31	24	0.939237	1987
Hofmann	Elvira	26	265.62	28	562.78	22	0.943957	1987
Finke	Christiane	25	265.75	29	556.35	15	0.955334	1987
Michallek	Vera	30	246.18	1	524.62	1	0.938508	1988
Borgschulze	Claudia	24	254.63	4	535.69	2	0.950662	1988
Jeorga	Caroline	19	256.01	6	549.88	5	0.931149	1988
Bartels	Astrid	25	257.61	7	562.29	13	0.916289	1988
Winkelmann	Antje	23	257.91	9	543.1	4	0.94977	1988
Metzner	Claudia	22	260.11	13	571.03	25	0.91102	1988
Hüls	Annette	22	260.5	15	557.91	11	0.933842	1988
Niemeyer	Susanne	22	260.9	17	567.43	18	0.919585	1988
Wirdemann	Meike	25	261.82	19	553.15	6	0.946651	1988
Wennemar	Sigrid	21	262.07	22	555.65	8	0.943292	1988
Kunkel	Sabine	24	262.48	23	541.76	3	0.96899	1988
Fromme	Carmen	18	265.33	30	571.62	27	0.928344	1988
Schwarzbauer	Gabriele	21	253.55	3	558.51	12	0.907952	1989
Mann	Sabine	24	255.13	4	549.14	6	0.929198	1989
Borgschulze	Claudia	25	255.49	5	545.52	4	0.936684	1989
Kunkel	Sabine	25	256.35	6	538.75	3	0.951647	1989
Breitenbach	Anke	20	256.65	8	550.78	7	0.931951	1989
Hüls	Annette	23	257.79	10	554.98	10	0.929006	1989
Vetter	Heidrun	28	259.3	13	566.3	17	0.915769	1989
Geukes	Nicole	20	259.38	14	567.41	18	0.91426	1989
Finke	Christiane	27	261	16	553.46	9	0.943158	1989
Pressler	Kerstin	27	261.28	17	537	1	0.97311	1989
Wennemar	Sigrid	22	262.81	20	558.46	11	0.941195	1989
Hägele	Nicole	23	263.75	25	569.55	24	0.92617	1989
Hüls	Susanne	23	264.15	16	569.6	26	0.927493	1989
Immerz	Claudia	23	266.5	30	568.84	21	0.936995	1989
Michallek	Vera	32	251.38	1	544.45	2	0.923427	1990
Schwarzbaue3r	Gabriele	22	251.48	2	545.67	4	0.921729	1900
Metzner	Claudia	24	251.99	4	546.45	5	0.92228	1990
Mann	Sabine	25	253.53	6	547.85	6	0.925545	1990
Breitenbach	Anke	21	257.11	11	561.81	13	0.915292	1990
Haak	Ute	24	257.83	12	560.98	12	0.919213	1990
Pressler	Kerstin	28	259.04	13	545.36	3	0.949978	1990
Borgschulze	Claudia	26	259.41	14	553.9	10	0.936667	1990
Hüls	Annette	24	259.45	15	553.67	9	0.937201	1990
Kunkel	Sabine	26	261.81	18	577.6	29	0.906544	1990
Hartmann	Karen	20	263.46	20	577.55	28	0.912337	1990
Hüls	Susanne	24	265.36	23	561.85	14	0.944594	1990
Kalinowski	Tanja	22	266.1	25	560.66	11	0.949238	1990
Mai	Yvonne	26	246.09	2	532.78	4	0.923796	1991
Hoffmann	Katje	20	253.13	3	539.78	9	0.937901	1991
Michallek	Vera	33	253.73	4	539.4	8	0.940786	1991
Marquardt	Rita	24	254.36	5	542.7	10	0.937387	1991
Oehme	Heike	28	254.64	7	569.88	29	0.893662	1991
Ullrich	Kathrin	24	255.52	9	527.11	2	0.969513	1991
Borgschulze	Claudia	27	256.06	10	534.13	4	0.958793	1991
Wassiluk	Petra	22	257.12	12	569.45	28	0.903047	1991
Horak	Birgit	28	259.2	16	566.71	24	0.914754	1991
Mann	Sabine	26	259.88	17	559.14	18	0.92957	1991
Hüls	Annette	25	260.67	20	557.75	15	0.93472	1991
Lieske	Monika	25	261.21	23	558.22	16	0.935868	1991
Ressing	Mareike	21	262.16	25	550.32	13	0.952755	1991
Hoffmann	Katje	21	250.12	2	537.37	4	0.930904	1992
Borgschulze	Claudia	28	252.01	4	536.71	3	0.939092	1992
Metzner	Claudia	26	254.21	6	543.41	7	0.93561	1992
DaFonseca-Wollheim	Kristina	20	254.57	7	558.05	15	0.912356	1992
Pippig	Uta	27	254.8	8	531.9	2	0.958075	1992
Hüls	Annette	26	258.11	15	568.22	24	0.908486	1992
Mai	Christina	21	260.83	21	547.34	9	0.953082	1992
Staab	Klothilde	31	263.9	26	566.1	23	0.932344	1992
Wolf	Kathrin	26	265.14	30	564.12	20	0.940013	1992
DaFonseca-Wollheim	Krtistina	21	249.85	1	560.3	13	0.891844	1993
Lokar	Claudia	29	252.23	4	531.35	2	0.949393	1993
Hoffmann	Katje	22	254.25	6	536.73	4	0.947404	1993
Leist	Sabine	27	257.52	8	565.37	19	0.910979	1993
Hüls	Annette	27	258.65	10	555.88	10	0.930597	1993
Theophil	Nicole	25	258.75	11	571.4	22	0.90567	1993
Kremer	Ursula	23	259.1	13	572.34	25	0.905406	1993
Wolf	Katrin	27	259.74	15	552.82	8	0.939691	1993
Mai	Christina	32	259.98	16	540.24	5	0.962461	1993
Bruns	Annette	19	260.02	17	577.68	30	0.900222	1993
Köster	Dörte	20	260.42	18	544.68	6	0.956231	1993
Michallek	Vera	34	261.17	19	561.14	14	0.930855	1993
Metzner	Claudia	27	263.51	20	553.07	9	0.952899	1993
Riemann	Sandra	20	264.35	23	563.41	16	0.938393	1993
Ressing	Mareike	23	264.9	25	564.57	17	0.938413	1993
Karhoff	Andrea	20	252.98	3	536.79	1	0.942566	1994
Hoffmann	Katje	23	256.14	7	553.45	5	0.925612	1994
DaFonseca-Wollheim	Kristina	22	256.35	8	567.95	18	0.90272	1994
Wassiluk	Petra	25	256.62	10	563.83	16	0.910274	1994
Stief	Christine	23	260.09	11	562.98	13	0.923976	1994
Metzner	Claudia	28	260.72	12	553.11	4	0.942742	1994
Soeder	Christiane	19	261.05	14	574.87	27	0.908205	1994
Mai	Christina	33	261.88	15	559.69	10	0.935804	1994
Hüls	Annette	28	265.11	22	561.81	12	0.943771	1994
Köster	Dörte	21	266.64	25	557.84	8	0.955973	1994
DaFonseca-Wollheim	Kristina	23	246.54	1	550.6	8	0.895532	1995
Friedmann	Ulrike	24	250.81	4	582.17	24	0.861638	1995
Karhoff	Andrea	21	250.89	5	577.93	17	0.868237	1995
Wassiluk	Petra	26	257.89	8	553.41	9	0.932003	1995
Lokar	Claudia	31	259.01	10	523.11	1	0.99027	1995
Zaituc	Luminita	27	260.56	11	545.73	3	0.954904	1995
Hüls	Annette	29	263.74	15	579.8	21	0.909762	1995
Stief	Christine	24	265.52	20	556.12	11	0.954902	1995
Wolf	Kathrin	29	267.29	25	555.66	10	0.962063	1995
Köster	Dörte	22	268.4	30	557.23	12	0.963337	1995
Hartmann	Karen	26	249.45	4	575.95	13	0.866221	1996
Zaituc	Luminita	28	251.54	5	534.36	2	0.941463	1996
Kallensee	Steffi	27	252.9	6	578.22	17	0.874754	1996
Byrd	Andreina	18	261.84	15	568.32	9	0.921453	1996
Wassiluk	Petra	27	262.12	16	542.91	4	0.965611	1996
Wolf	Kathrin	30	262.15	17	555.5	5	0.943834	1996
Maisch	Ulrike	19	265.91	26	563.47	7	0.94383	1996
Jeck	Saskia	20	266.57	30	575.32	12	0.926684	1996
DaFonseca-Wollheim	Kristina	25	244.86	1	532.2	1	0.92018	1997
Kühnemund	Sylvia	23	247.49	2	585.5	29	0.845397	1997
Zaituc	Luminita	29	249.41	4	550.73	3	0.905743	1997
Köster	Dörte	24	256.45	10	577.52	17	0.888108	1997
Stief	Christine	26	261.23	15	573.96	16	0.910272	1997
Klein-Arndt	Melanie	22	261.96	16	585.66	30	0.89458	1997
Nußbeck	Sylvia	20	262.57	17	585.26	27	0.897276	1997
Suffa	Laura	19	263.5	18	567.81	12	0.928127	1997
Soeder	Christiane	22	263.57	19	559.59	7	0.942011	1997
Byrd	Andreina	19	264.76	21	566.09	9	0.935399	1991
Seebahn	Michaela	22	264.78	22	570.76	14	0.927816	1997
Kühnemund	Sylvia	24	245.96	2	573.59	10	0.857616	1998
Zaituc	Luminita	30	246.33	3	550.18	2	0.895452	1998
Frantz	Heike	27	257.77	9	580.21	15	0.88854	1998
Nußbeck	Sylvia	21	259.98	11	568.54	6	0.914553	1998
Schulz	Melanie	19	261.62	12	568.71	7	0.920047	1998
Karhoff	Andrea	24	262.69	14	566.47	4	0.927463	1998
Kästner	Gabi	18	264.42	17	578.2	14	0.914632	1998
Ritter	Susanne	20	266.34	23	576.98	12	0.923221	1998
Kraus	Melanie	24	267.43	27	553.24	3	0.966778	1998
DaFonseca-Wollheim	Kristina	27	241.44	1	517.3	1	0.933462	1999
Mikitenko	Irina	27	246.68	2	525.49	2	0.938857	1999
Zasituc	Luminita	31	248.17	4	533.72	3	0.929963	1999
Walter	Doreen	23	250.88	5	553.9	6	0.905867	1999
Klein-Arndt	Melanie	24	256.25	12	572.27	12	0.895556	1999
Nußbeck	Sylvia	22	256.42	13	548.04	4	0.935771	1999
Lenske	Gerlinde	20	257.33	14	571.48	11	0.900574	1999
Suffa	Laura	21	260.41	18	560.16	8	0.92977	1999
Kleinmann	Larissa	21	262.4	20	556.75	7	0.942613	1999
Drews	Cathleen	20	263.67	22	582.87	19	0.90473	1999
Splinter	Katharina	15	267.41	27	591.75	29	0.903794	1999
DaFonseca-Wollheim	Kristina	28	245.07	1	544.03	3	0.900943	2000
Mikitenko	Irina	28	247.13	4	510.39	1	0.968397	2000
Zaituc	Luminta	32	249.08	5	543.2	2	0.917084	2000
Brauer	Lina	19	261.38	15	592.52	27	0.882266	2000
Kleinmann	Larissa	22	261.87	18	566.66	8	0.924258	2000
Weiss	Annette	32	262.71	19	577.73	15	0.909456	2000
Mockenhaupt	Sabrina	20	263.43	22	550.28	5	0.95744	2000
Maisch	Ulrike	23	263.82	23	570.58	10	0.924743	2000
Bultmann	Birte	26	267.26	29	575.4	12	0.928954	2002
Mikitenko	Irina	29	246.08	2	512.89	1	0.959582	2001
DaFonseca-Wollheim	Kristina	29	246.71	3	543.94	3	0.907122	2001
Schulz	Melanie	22	252.42	5	559.24	4	0.902725	2001
Mockenhaupt	Sabrina	22	253.38	7	539.7	2	0.938966	2001
Zaituc	Luminita	33	254.4	8	571.12	8	0.890881	2001
Nußbeck	Sylvia	24	258.52	10	566.23	5	0.913127	2001
Günther	Steffi	17	262.43	13	574.23	10	0.914024	2001
Weiss	Annette	33	263.43	17	578.42	13	0.910861	2001
Hagedorn	Jeannine	21	263.62	18	580.63	14	0.908048	2001
Splinter	Katharina	17	266.59	26	590.4	20	0.903083	2001
Maisch	Ulrike	24	266.83	29	577.7	12	0.923767	2001
Schulz	Melanie	23	252.61	2	536.46	2	0.941766	2002
DaFonseca-Wollheim	Kristina	30	253.09	3	547.4	3	0.924699	2002
Zaituc	Luminita	34	253.45	4	568.58	7	0.891519	2002
Maisch	Ulrike	25	258.94	6	560.79	6	0.923483	2002
Mockenhaupt	Sabrina	22	259.26	7	535.55	1	0.968201	2002
Nußbeck	Sylvia	25	260.87	9	581	12	0.898003	2002
Bultmann	Birte	28	262.23	15	556.19	4	0.942951	2002
Möldner	Antje	18	262.31	16	586.35	16	0.894722	2002
Beck	Annette	22	265.59	23	579.39	11	0.916792	2002
Falkenstein	Susanne	36	272.09	30	596.42	30	0.912411	2002
Mikitenko	Irina	31	250.76	1	519.29	1	0.96578	2003
Mockenhaupt	Sabrina	23	256.21	4	524.65	2	0.976689	2003
Klein-Arndt	Melanie	28	257	6	573.63	6	0.896048	2003
Möldner	Antje	19	258.92	7	574.82	8	0.900873	2003
Thieke	Stefganie	17	261.05	10	590.06	22	0.884825	2003
Ritter	Susanne	25	261.53	11	578.34	10	0.904416	2003
Bultmann	Birte	29	262.96	12	556.28	3	0.945423	2003
Janssen	Saskia	18	264.37	15	590.76	26	0.895017	2003
Schnurrenberger	Regina	18	264.51	16	581.4	13	0.909907	2003
Beck	Annette	23	265.99	18	584.67	17	0.909881	2003
Reinhardt	Anja	23	267.51	23	590.63	24	0.905846	2003
Tiedemann	Anke	28	268.95	27	572.73	4	0.939186	2003
Mohr	Christina	18	270.17	28	573.81	7	0.941671	2003
Mikitenko	Irina	32	249.11	2	523.17	1	0.95231	2004
Möldner	Antje	20	254.27	4	547.51	3	0.928823	2004
Thieke	Stephanie	18	258.42	7	562.73	4	0.918451	2004
Werner	Kerstin	22	262.87	8	583.36	14	0.901227	2004
Bultmann	Birte	30	262.94	9	565.15	5	0.930514	2004
Schnurrenberger	Rebina	19	265.26	11	583.71	17	0.908876	2004
Lutz	Susi	17	267.13	16	578.92	10	0.922856	2004
Raunft	Carolin	27	267.57	18	587.23	25	0.911295	2004
Schabel	Anja	19	269.36	24	585.14	19	0.920669	2004
Scheffold	Sabrina	23	270.6	28	586.52	22	0.922731	2004
Byrd	Andreina	26	270.26	27	583.67	16	0.926071	2004
Restle	Simret	22	270.68	29	574.65	7	0.942069	2004
Reinhardt	Anja	24	265.89	13	590.86	28	0.90001	2004
Möldner	Antje	21	248.81	1	540.74	2	0.920257	2005
Friedrich	Kathleen	28	248.88	2	557.48	3	0.892875	2005
Mockenhaupt	Sabrina	25	254.93	3	526.38	1	0.968616	2005
Horna	Annett	18	264.03	9	585.3	20	0.902204	2005
Reinhardt	Anja	25	265.4	10	579.33	16	0.916231	2005
Kröckert	Christina	16	266.13	13	570.85	8	0.932399	2005
Hilschenz	Marina	24	267.8	17	567.18	6	0.944321	2005
Restle	Simret	21	268	19	567.09	5	0.945176	2005
Lutz	Susi	18	268.89	20	585.6	21	0.91834	2005
Dreier	Verena	20	269.41	22	581.89	18	0.925983	2005
Abel	Svenja	22	269.48	23	576.85	12	0.934316	2005
Kock	Maren	15	270.54	27	573.29	10	0.943816	2005
Heinig	Katharina	16	270.63	29	588.66	23	0.919478	2005
Möldner	Antje	22	251.23	1	553.65	2	0.907541	2006
Krebs	Denise	19	258.35	3	585.87	21	0.881936	2006
Reinhardt	Anja	26	264.22	9	586.77	22	0.900591	2006
Bultmann	Birte	32	264.22	10	560.11	4	0.943458	2006
Kramer	Nina	16	265.5	13	579.75	18	0.915912	2006
Restle	Simret	22	265.93	14	561.53	5	0.947162	2006
Dreier	Verena	21	266.55	15	571	8	0.933625	2006
Hilschenz	Marina	25	266.6	16	559.13	3	0.953624	2006
Schulz	Melanie	27	267.39	17	575.86	10	0.928663	2006
Lutz	Susi	19	267.61	18	579.02	16	0.924355	2006
Hiller	Julia	19	267.72	19	567	7	0.944339	2006
Heinig	Katharina	17	260.13	22	579	15	0.898549	2006
Kilius	Svenja	21	270.37	26	579.26	17	0.933501	2006
Rosenauer	Meike	25	270.72	30	577.58	11	0.937429	2006
Möldner	Antje	23	252.31	1	548.58	3	0.919866	2007
Mockenhaupt	Sabrina	27	254.83	2	532.17	1	0.957701	2007
Restle	Simret	23	256.07	3	545.99	2	0.938003	2007
Krebs	Denise	20	258.88	5	577.62	9	0.896368	2007
Rosenplänter	Kata	26	260.96	7	577.09	8	0.9044	2007
Kock	Maren	17	262.43	10	584.06	14	0.898641	2007
Badane	Sena	17	263.92	12	590.72	17	0.893554	2007
Schadt	Christina	21	266	16	593.02	23	0.897103	2007
Kramer	Nina	17	268.33	23	598.3	30	0.896975	2007
Lang	Carolin	21	268.92	24	576.72	7	0.932584	2007
Börner	Julia	17	270.61	30	576.24	6	0.939227	2007
Hiller	Julia	21	259.63	5	553.82	2	0.937597	2008
Sussmann	Jana	18	259.75	6	574.7	11	0.90395	2008
Pohl	Veronika	23	260.48	7	571.05	8	0.912284	2008
Bühler	Sigrid	29	262.94	11	579.19	15	0.907958	2008
Restle	Simret	24	263.1	12	563.07	3	0.93452	2008
Koubaa	Sanaa	23	264.19	15	571.4	9	0.924711	2008
Schadt	Kristina	22	264.58	16	586.24	25	0.902634	2008
Strausa	Agata	19	264.73	17	591.9	28	0.894509	2008
Badane	Sena	19	265.2	20	585.97	24	0.905166	2008
Kock	Maren	19	265.37	22	580.23	16	0.914706	2008
Lutz	Susi	21	266.51	24	570.35	6	0.934549	2008
Reinhardt	Anja	28	267.93	27	582.71	20	0.9196	2008
Restle	Simret	25	260.03	9	555.35	3	0.936454	2009
Sussmann	Jana	19	261.94	13	582.6	20	0.89921	2009
Schadt	Kristina	23	262.92	18	583.18	21	0.901677	2009
Lange	Julia	24	263.33	19	579.48	19	0.908849	2009
Viellehner	Julia	24	265.01	21	571.86	13	0.926835	2009
Kock	Maren	19	266.31	24	570.75	12	0.933193	2009
Kröckert	Christina	20	267.82	28	566.68	10	0.945225	2009
Bultmann	Birte	34	268.2	29	561.76	4	0.954856	2009
Strausa	Agata	21	256.37	4	555.54	2	0.922958	2010
Killius	Svenja	25	258.52	6	592.55	30	0.872568	2010
Restle	Simret	26	259.21	8	546.46	1	0.948688	2010
Kock	Maren	20	260.41	11	556.7	3	0.935549	2010
Kramer	Nina	20	261.51	12	578.81	12	0.903613	2010
Pohl	Veronica	25	262.3	13	564.06	4	0.930043	2010
Kröckert	Christina	21	263.66	15	566.75	5	0.930428	2010
Bühler	Sigrid	31	264.21	16	571.1	7	0.925267	2010
Platt	Stephanie	19	265.16	19	584.78	19	0.906871	2010
Hiller	Julia	23	266.84	22	573.3	10	0.930891	2010
Krebs	Aline	22	268.43	25	579.85	15	0.92586	2010
Rehberg	Maya	16	268.83	26	573.98	11	0.936723	2010
Lutz	Susi	23	270.54	27	578.7	12	0.934992	2010
Hirschhäuser	Jana	20	270.95	28	584.76	18	0.926705	2010
Harrer	Corinna	20	248.63	2	541.29	2	0.918657	2011
Kock	Maren	21	258.13	9	551.13	3	0.93673	2011
Jäsert	Lisa	19	259.06	11	566.1	6	0.915245	2011
Ollesch	Lisa	18	259.44	12	587.1	26	0.883802	2011
Restle	Simret	27	259.61	13	554.26	4	0.936781	2011
Ollesch	Isabell	18	262.31	15	586.85	24	0.893959	2011
Neumeyer	Regina	19	263.6	16	586.86	25	0.89834	2011
Rehberg	Maya	17	263.7	18	575.17	12	0.916946	2011
Burkhard	Elena	19	267.52	22	575.27	13	0.930068	2011
Maisch	Ulrike	34	268.09	23	571.38	9	0.938395	2011
Hilschenz	Marina	30	268.64	26	569.29	7	0.943772	2011
Aehling	Carolin	22	268.83	29	578.56	14	0.929307	2011
Koubaa	Sanaa	26	269.58	30	570.77	8	0.944619	2011
Harrer	Corinna	21	244.3	1	535.47	1	0.912469	2012
Kock	Maren	22	251.72	6	535.6	2	0.939955	2012
Danner	Christiane	24	259.57	11	576.95	11	0.899801	2012
Rehberg	Maya	18	260.55	12	569.04	6	0.915753	2012
Granz	Caterina	18	261.05	13	588.9	17	0.886568	2012
Teegen	Isabell	19	263.53	14	578.88	12	0.910482	2012
Krebs	Aline	24	264.18	17	580.92	15	0.909523	2012
Soethout	Jana Janine	23	265.63	19	568.86	5	0.933903	2012
Feil	Frederike	26	268.21	26	593.01	20	0.904572	2012
Dietz	Maria	16	269.11	28	580.26	14	0.92755	2012
Sujew	Diana	23	245.62	1	527.68	1	0.930943	2013
Harrer	Corinna	22	246.6	2	543.55	3	0.907368	2013
Sujew	Elena	23	248.82	3	537.56	2	0.925739	2013
Dietz	Maria	17	258.02	11	560.4	7	0.920842	2013
Granz	Caterina	19	259.72	13	579.99	17	0.895602	2013
Teegen	Isabell	20	259.84	14	568.3	9	0.914447	2013
Reh	Alina	16	262.88	18	557.52	5	0.943033	2013
Krebs	Aline	25	262.95	19	572.91	11	0.917945	2013
Rehberg	Maya	19	263.01	20	557.87	6	0.942908	2013
Reischmann	Anne	21	265.44	25	591.12	30	0.898092	2013
Klosterhalfen	Konstanze	16	266.58	28	579.85	15	0.919479	2013
Coutellier	Vera	18	267.64	30	588.33	25	0.90983	2013
Sujew	Diana	24	245.72	1	532.68	2	0.92258	2014
Sujew	Elina	24	247.82	2	544.3	4	0.910601	2014
Krebs	Denise	27	248.16	3	560.34	11	0.885748	2014
Harrer	Corinna	23	250.09	4	555.85	9	0.899847	2014
Kock	Maren	24	250.68	5	530.12	1	0.945748	2014
Heim	Thea	22	252.94	9	576.76	17	0.877107	2014
Granz	Caterina	20	253.25	10	567.93	12	0.891835	2014
Teegen	Isabell	21	257.17	12	552.3	8	0.931269	2014
Themann	Tabea	22	258.49	13	573.12	14	0.902045	2014
Klaassen	Lena	23	258.83	14	581.83	25	0.88971	2014
Burkard	Elena	22	259.68	16	558.45	10	0.930003	2014
Klosterhaöfen	Konstanze	17	259.97	18	579.65	21	0.89699	2014
Reh	Alina	17	261.21	19	545.07	5	0.958446	2014
Kock	Maren	25	247.56	1	544.68	3	0.909011	2015
Sujew	Elina	25	249.28	2	563.48	11	0.884787	2015
Klosterhalfen	Konstanze	18	249.58	3	533.21	1	0.936141	2015
Krause	Gesa Felicitas	23	251.03	6	542.04	2	0.926242	2015
Sujew	Diana	25	252.03	7	545.97	4	0.923238	2015
Themann	Tabea	23	254.55	9	556.53	7	0.914775	2015
Roggel	Anja	20	257.27	10	566.25	12	0.90868	2015
Kick	Julia	25	257.95	11	579.07	21	0.890911	2015
Reh	Alina	18	259.4	13	548.27	5	0.946249	2015
Schwanz	Annemarie	22	260.33	16	575.48	20	0.90474	2015
Koubaa	Sanaa	30	261.8	18	560.65	8	0.933916	2015
Kesselring	Annemarie	26	262.31	21	584.36	24	0.897768	2015
Rehberg	Maya	21	262.53	22	555.39	6	0.94539	2015
Horna	Annett	28	265.08	25	573.66	17	0.924171	2015
Högl	Regina	22	266.3	28	575.34	18	0.925713	2015
Klosterhafen	Konstanze	19	246.91	1	526.74	1	0.937502	2016
Granz	Caterina	22	253.22	7	553.02	4	0.915772	2016
Strausa	Agata	27	253.99	10	551.56	3	0.920988	2016
Reh	Alina	19	254.64	11	558.92	6	0.911186	2016
Kick	Juöia	26	255.16	13	577.89	12	0.883075	2016
Sussmann	Jana	26	255.91	14	550.37	2	0.929956	2016
Themann	Tabea	24	256.17	16	555.61	5	0.922122	2016
Rehberg	Maya	22	257.54	17	560.37	7	0.919178	2016
Gers	Agnes Thurid	19	264.63	26	587.3	23	0.901175	2016
Klosterhalfen	Konstanze	20	238.92	1	509.89	1	0.937143	2017
Klein	Hanna	24	244.15	2	541.64	2	0.901521	2017
Kick	Julia	27	250.9	5	562.89	6	0.891471	2017
Burkard	Elena	25	250.92	6	545.28	3	0.920335	2017
Sussmann	Jana	27	258.61	13	573.52	9	0.901834	2017
Dattke	Miriam	19	258.99	14	563.33	7	0.919497	2017
Rehberg	Maya	23	261.35	17	562.58	5	0.929112	2017
Helm	Thea	25	262.15	18	560.41	4	0.935565	2017
Gerdes	Chritina	22	264.98	30	582.72	17	0.909459	2017
Burkard	Elena	26	246.51	4.	525.43	2.	0.938317	2018
Coutellier	Vera	23	257.4	13.	573.42	10.	0.897771	2018
Dattke	Miriam	20	260.55	22.	552.42	4.	0.943304	2018
Heim	Thea	26	263.03	27.	573.47	11.	0.917328	2018
Klosterhalfen	Konstanze	21	246.34	2.	518.04	1.	0.951046	2018
Pauer (AUT)	Nada Ina	32	259	18.	546.52	3.	0.947815	2018
Wrede	Linda	25	260.31	21.	570.69	8.	0.912264	2018
Benfares(FRA)	Sara	18	257.57	8.	577.02	11.	0.892759	2019
Dattke	Miriam	21	256.59	7.	547.14	5.	0.937932	2019
Gerdes	Christina	24	268.61	30.	567.04	8.	0.947411	2019
Klein	Hanna	26	248.12	3.	525	2.	0.945219	2019
Klosterhalfen	Konstanze	22	239.02	1.	500.07	1.	0.955946	2019
Papenfuß	Josina	19	263.52	21.	567.6	10.	0.928541	2019
Pfüller	Antje	17	264.8	23.	585.31	22.	0.90482	2019
Pingpank	Svenja	23	258.23	11.	561.5	7.	0.919786	2019
Schultze-Berndt	Carmen	23	265.9	24.	578.13	13.	0.919862	2019
Schumacher	Denise	25	268.42	29.	583.91	17.	0.919388	2019
Sussmann	Jana	29	261.55	18.	567.22	9.	0.922217	2019
Benfares	Sara	19	262.16	18.	570.18	12.	0.919569	2020
Brömmel	Rahel	18	266.42	25.	574.36	14.	0.927711	2020
Burkard	Elena	28	246.85	2.	524.92	1.	0.940524	2020
Coutellier	Vera	25	253.27	6.	556.86	5.	0.909636	2020
Gürth	Olivia	18	267.34	26.	582.13	19.	0.918489	2020
Hirscher	Kerstin	31	257.78	8.	553.26	4.	0.931858	2020
Hoffmann	Vera	24	259.18	12.	552.27	3.	0.938599	2020
Meisl	Verena	19	257.85	10.	576.43	15.	0.894645	2020
Meyer	Lea	23	263.35	20.	560.54	6.	0.93963	2020
Reh	Alina	23	255.78	7.	531.36	2.	0.962737	2020
Vortmeier	Anneke	18	267.93	28.	569.9	11.	0.94027	2020
Wrede	Linda	27	262.26	19.	587.73	30.	0.892451	2020
Benfares	Sara	20	247.3	5.	543.09	6.	0.910715	2021
Brömmel	Rahel	19	262.96	25.	566.44	17.	0.928466	2021
Burkard	Elena	29	249.19	6.	520.46	2.	0.957576	2021
Coutellier	Vera	26	250.71	7.	548.5	7.	0.914166	2021
Dattke	Miriam	23	263.02	26.	539.24	4.	0.975521	2021
Hirscher	Kerstin	32	264.3	30.	553.38	10.	0.955221	2021
Klein	Hanna	28	242.58	1.	526.01	3.	0.92234	2021
Klosterhalfen	Konstanze	24	245.26	3.	516.7	1.	0.949332	2021
Pfüller	Antje	19	259.46	17.	569.97	21.	0.910434	2021
Pulte	Johanna	18	262.92	24.	557.1	11.	0.943888	2021
Benfares	Sara	21	251.17	7.	536.36	3.	0.936572	2022
Benfares	Selma	23	256.41	13.	557.03	6.	0.920633	2022
Brömmel	Rahel	20	261.44	23.	570.25	12.	0.916931	2022
Klosterhalfen	Konstanze	25	244.6	3.	520.44	1.	0.939974	2022
Pingpank	Svenja	26	262.11	25.	571.73	14.	0.916901	2022
