# Supplementary material for: Sex-specific characteristics of special endurance and performance potential in female runners
Source: BMC Res Notes. 2025 Apr 26;18:196. doi: 10.1186/s13104-025-07256-6 (PMC12032771; doi:10.1186/s13104-025-07256-6)
Supplement: Supplementary file 7 — Supplementary Material 7 [file 13104_2025_7256_MOESM7_ESM.xlsx]

## Sheet: Tabelle1
name	first name	age	sec 200m	placement 200m	sec 400m	placement 400m	KsA value	year
Sussiek	Christina	20	23.32	2	52.9	3	0.881664	1980
Bußmann	Gaby	21	23.55	4	51.1	1	0.921722	1980
Decker	Elke	23	23.4	6	52.12	2	0.897928	1980
Wosnitza	Dorothee	24	23.4	7	53.66	9	0.872158	1980
Steger	Claudia	21	23.95	15	53.74	10	0.891329	1980
Everts	Sabine	19	24.02	20	53.3	6	0.901313	1980
Bockelmann	Marie-Luise	21	24.18	24	55.11	26	0.877518	1980
Steger	Claudia	22	22.95	1	52.48	3	0.874619	1981
Bußmann	Gaby	22	23.24	5	50.83	1	0.914421	1981
Finger	Ute	23	23.39	6	52.32	2	0.894113	1981
Schniggendiller	Cornelia	25	23.43	8	54.7	25	0.856673	1981
Everts	Sabine	20	23.53	9	52.8	9	0.891288	1981
Vöcking	Birgit	21	23.62	11	52.52	4	0.899467	1981
Griese	Anne	18	23.66	12	54.38	17	0.870173	1981
Schmidt	Heike	23	23.7	14	52.64	5	0.900456	1981
Daimer	Rita	19	23.87	18	52.64	6	0.906915	1981
Decker	Elke	24	24.01	21	52.68	7	0.911541	1981
Schmidt	Heike	24	22.97	1	52.26	3	0.879066	1982
Finger	Ute	24	23.14	3	51.47	2	0.899165	1982
Bußmann	Gaby	23	23.24	4	50.64	1	0.917852	1982
Steger	Claudia	23	23.4	8	52.58	5	0.890072	1982
Krug	Corinna	18	23.8	16	55.04	24	0.864826	1982
Daimer	Rita	20	24.06	17	52.74	6	0.9124	1982
Wagner	Mary	21	23.9	20	53.5	9	0.893458	1982
Lix	Karin	17	24.18	24	53.8	10	0.898885	1982
Brinkmann	Christiane	20	24.25	26	52.52	4	0.923458	1982
Vöcking	Birgit	22	24.28	29	53.64	8	0.905295	1982
Bußmann	Gaby	24	23.15	1	49.75	1	0.930653	1983
Thimm	Ute	25	23.15	2	50.78	2	0.911776	1983
Gaugel	Elke	24	23.66	7	54.81	27	0.863346	1983
Everts	Sabine	22	23.81	12	53.37	9	0.892262	1983
Steger	Claudia	24	24.05	20	53.78	14	0.894385	1983
Leistenschneider	Nicole	16	24.06	21	52.67	5	0.913613	1983
Lix	Karin	18	23.9	23	52.79	7	0.905475	1983
Brinkmann	Christiane	21	24.24	28	52.7	6	0.919924	1983
Decker	Elke	26	24.34	30	53.61	12	0.90804	1983
Arendt	Helga	19	24.1	30	53.57	11	0.899757	1983
Thimm	Ute	26	22.95	2	50.37	1	0.911257	1984
Sommer	Ulrike	25	23.38	4	53.3	12	0.877298	1984
Decker	Elke	27	23.46	5	52.8	5	0.888636	1984
Bußmann	Gaby	25	23.58	6	50.98	2	0.925069	1984
Schulte-Mattler	Heike	26	23.61	7	52.37	3	0.901661	1984
Wahl	Christine	17	23.73	9	52.92	7	0.896825	1984
Steger	Claudia	25	23.82	10	53.01	9	0.898698	1984
Krug	Corinna	20	23.94	12	54.61	21	0.876762	1984
Sussiek	Christina	24	24	16	52.94	8	0.906687	1984
Ortel	Astrid	19	24.2	25	54.97	30	0.88048	1984
Nolte	Sabie	16	24	28	54.33	18	0.88349	1984
Gaugel	Heidi-Elke	26	22.56	1	52.83	6	0.85406	1985
Thimm	Ute	27	23.13	3	53.53	11	0.864188	1985
Sommer	Ulrike	26	23.53	5	52.73	4	0.892471	1985
Ortel	Astrid	20	23.82	12	52.78	5	0.902615	1985
Fischer	Silke	21	23.99	18	54.35	19	0.882797	1985
Brinkmann	Christiane	23	24.02	19	52.42	2	0.916444	1985
Kinzel	Gisela	24	24.07	21	51.68	1	0.931502	1985
Schulte-Mattler	Heike	27	24.08	23	52.53	3	0.916809	1985
Alber	Sabine	20	24.16	26	54.08	14	0.893491	1985
Thimm	Ute	28	22.88	1	51.15	2	0.894624	1986
Gaugel	Heidi-Elke	27	22.91	2	54.26	17	0.844453	1986
Kinzel	Gisela	25	23.3	4	50.83	1	0.916781	1986
Arendt	Helga	22	23.69	9	52.22	5	0.907315	1986
Sommer	Ulrike	27	23.89	15	53.45	10	0.89392	1986
Abt	Gudrun	24	23.8	19	53.12	7	0.896084	1986
Lix	Ute	21	24.05	23	52.3	6	0.919694	1986
Ortel	Astrid	21	24.11	26	53.63	12	0.899124	1986
Lix	Karin	21	24.13	27	51.85	4	0.930762	1986
Thimm	Ute	29	22.87	1	50.82	1	0.900039	1987
Kinzel	Gisela	26	23.47	5	51.29	2	0.915188	1987
Schabinger	Michaela	26	23.58	6	52.54	5	0.897602	1987
Janke	Karin	24	23.62	6	53.38	8	0.884976	1987
Abt	Gudrun	25	23.72	11	53	7	0.895094	1987
Alber	Sabine	22	23.73	12	54.29	19	0.874194	1987
Sommer	Ulrike	28	23.85	13	53.92	12	0.884644	1987
Arendt	Helga	23	23.93	14	51.7	3	0.925725	1987
Lix	Karin	22	24.17	24	52.14	4	0.927119	1987
Watschke	Corinna	26	24.21	25	53.8	11	0.9	1987
Kisabaka	Linda	18	24	27	52.61	6	0.912374	1987
Schley	Gabriele	23	24.28	29	54.88	27	0.88484	1987
Thimm	Ute	30	23	2	50.28	1	0.914877	1988
Arendt	Helga	24	23.13	4	50.36	2	0.918586	1988
Abt	Gudrun	26	23.35	6	52.22	5	0.894293	1988
Janke	Karin	25	23.59	8	52.59	6	0.897129	1988
Kinzel	Gisela	27	23.81	11	52.08	3	0.914363	1988
Schabinger	Michaela	27	24	17	52.2	4	0.91954	1988
Heinz	Ulrike	21	24.08	19	54.39	20	0.885457	1988
Seuser	Sandra	22	24.12	20	53.3	10	0.905066	1988
Fischer	Silke	24	24.16	21	54.65	25	0.884172	1988
Janke	Karin	26	23.39	28	52	30	0.899615	1988
Kisabaka	Linda	20	23.75	9	52.24	3	0.909265	1989
Lehmann	Karin	27	24.25	18	54.22	10	0.894504	1989
Arendt	Helga	25	23.93	11	51.8	1	0.923938	1989
Kersten	Bettina	24	24.39	25	54.37	12	0.897186	1989
Scheppan	Ruth	20	24.44	29	53.9	6	0.906865	1989
Knoll	Silke	23	22.4	1	52.06	3	0.860546	1990
Janke	Karin	27	23.11	3	50.64	1	0.912717	1990
Haggenmüller	Andrea	22	23.73	8	55.08	29	0.861656	1990
Arendt	Helga	26	23.7	13	51.76	2	0.915765	1990
Lehmann	Karin	28	23.98	14	54.22	14	0.884544	1990
Seuser	Sandra	24	24.11	17	53.72	9	0.897617	1990
Heinz	Ulrike	23	24.17	20	54.81	24	0.881956	1990
Kisabaka	Linda	21	24.22	22	52.61	4	0.920738	1990
Rieger	Silvia	20	24	24	53.93	10	0.890043	1990
Kuschmann	Sandra	16	24.31	27	54.45	19	0.892929	1990
Maschmann	Petra	19	24.34	30	54.49	21	0.893375	1990
Breuer	Grit	19	22.45	2	49.42	1	0.908539	1991
Knoll	Silke	24	22.81	4	53.65	17	0.850326	1991
Derr	Manuela	20	23.3	7	52.41	8	0.889143	1991
Rohländer	Uta	22	23.38	9	52.1	5	0.897505	1991
Janke	Karin	28	23.66	14	51.75	2	0.914396	1991
Hesselbarth	Anett	25	23.89	21	52.42	9	0.911484	1991
Kisabaka	Linda	22	24.14	30	52.68	10	0.916477	1991
Thomas	Andrea	29	22.81	2	51.98	3	0.877645	1992
Kisabaka	Linda	23	23.26	4	52.01	5	0.894443	1992
Böhme	Anja	21	23.55	6	54.03	23	0.871738	1992
Fahrendorf	Doreen	24	23.72	10	52.44	9	0.904653	1992
Schönenberger	Jana	21	23.74	11	54.19	24	0.876176	1992
Derr	Manuela	21	23.8	14	52.05	7	0.914505	1992
Rohlander	Uta	23	23.82	15	52	4	0.916154	1992
Bornscheuer	Andrea	18	24.08	24	54.54	29	0.883022	1992
Heinz	Ulrike	25	24.24	30	53.65	19	0.903635	1992
Knoll	Silke	26	22.75	1	52.86	6	0.860764	1993
Schönenberger	Jana	22	23.23	3	52.77	5	0.880424	1993
Rockmeier	Gabi	20	23.51	8	55.25	30	0.851041	1993
Janke	Karin	30	23.66	12	52.55	2	0.900476	1993
Fahrendorff	Doreen	25	24.11	29	52.96	8	0.910498	1993
Knoll	Silke	27	22.55	2	51.9	4	0.868979	1994
Haggenmüller	Angelika	25	23.29	7	53.29	10	0.874085	1994
Schönenberger	Jana	23	23.48	8	52.42	6	0.895841	1994
Janke	Karin	31	23.66	11	51.85	3	0.912633	1994
Rockmeier	Gabi	21	23.81	13	53.75	14	0.885953	1994
Scheppan	Ruth	25	24.12	23	53.7	13	0.898324	1994
Knoll	Silke	28	22.45	1	50.85	1	0.882989	1995
Rockmeier	Gabi	22	23.47	7	54.42	19	0.862551	1995
Schönenberger	Jana	24	23.53	8	52.56	7	0.895358	1995
Breuer	Grit	23	23.63	10	51.68	4	0.914474	1995
Kisabaka	Linda	26	23.71	11	51.57	3	0.919527	1995
Rohländer	Uta	26	23.75	12	51.42	2	0.923765	1995
Feller	Anke	24	23.77	15	53.12	8	0.894955	1995
Janke	Karin	32	23.82	19	52.19	6	0.912819	1995
Cordes	Ina	27	23.96	25	53.56	14	0.894698	1995
Knoll	Silke	29	23.04	3	51.93	5	0.887348	1996
Rücker	Anja	24	23.4	6	51.11	2	0.915672	1996
Feller	Anke	25	23.68	8	52.29	7	0.905718	1996
Haggenmüller	Angelika	27	23.73	9	54.34	22	0.87339	1996
Kette	Nancy	19	24.01	16	54.33	21	0.883858	1996
Schönenberger	Jana	25	24.18	27	53.29	12	0.907487	1996
* Ekpo-Umoh	Florence	19	24.25	29	52.7	10	0.920304	1996
Breuer	Grit	25	22.73	1	49.98	1	0.909564	1997
Rockmeier	Birgit	24	23.11	6	54.14	15	0.853713	1997
Knoll	Silke	30	23.19	7	53.21	9	0.871641	1997
Feller	Anke	26	23.29	8	52.24	5	0.891654	1997
Marahrens	Nicole	20	23.53	10	53.84	13	0.874071	1997
Rohländer	Uta	28	23.6	11	51.54	3	0.915794	1997
Kette	Nancy	20	23.66	13	55.22	28	0.856936	1997
Rücker	Anja	25	23.76	14	51.36	2	0.925234	1997
Ekpo-Umoh	Florence	20	23.89	18	52.18	4	0.915677	1997
Knippel	Anja	23	24.24	30	52.65	6	0.920798	1997
Marahrens	Nicole	21	23.49	8	52.92	8	0.887755	1998
Cordes	Ina	30	23.7	11	54.73	20	0.86607	1998
Feller	Anke	27	23.87	14	52.74	6	0.905195	1998
Ekpo-Umoh	Florence	21	23.88	15	51.32	3	0.930631	1998
Knippel	Anja	24	24.01	22	52.01	4	0.923284	1998
Weißmann	Nadine	19	24.12	27	54.86	24	0.879329	1998
Urbansky	Ulrike	21	24.16	28	52.58	5	0.918981	1998
Breuer	Grit	27	23.02	4	50.16	2	0.917863	1999
Rockmeier	Birgit	26	23.14	7	52.86	10	0.87552	1999
Rücker	Anja	27	23.444	11	49.74	1	0.942662	1999
Feller	Anke	28	23.54	13	51.82	5	0.90853	1999
Ekpo-Umoh	Florence	22	23.63	15	51.58	4	0.916247	1999
Rohländer	Uta	30	23.78	19	51.19	3	0.929088	1999
Breu	Martina	27	23.8	20	52.47	8	0.907185	1999
Tisner	Karen	21	23.87	22	54.03	20	0.883583	1999
Faulhaber	Katja	25	23.96	25	53.9	18	0.889054	1999
Gosh	Shanta	25	22.8	3	51.74	5	0.88133	2000
Rockmeier	Birgit	27	23.24	6	51.45	3	0.903401	2000
Breuer	Grit	28	23.46	9	51.06	1	0.918919	2000
Kette	Nancy	23	23.62	10	53.72	17	0.879375	2000
Marahrens	Nicole	23	23.74	12	54.11	22	0.877472	2000
Feller	Anke	29	23.74	13	52.32	7	0.907492	2000
Ekpo-Umoh	Florence	23	23.84	17	51.67	4	0.922779	2000
Schulze	Maren	18	23.92	20	53.69	16	0.891041	2000
Cordes	Ina	32	24	25	53.2	10	0.902256	2000
Tinsner	Karen	22	24.07	26	53.28	13	0.903529	2000
Rohländer-Fromm	Uta	31	24.08	27	51.42	2	0.936601	2000
Rücker	Anja	28	23.91	18	52.05	6	0.918732	2000
Breuer	Grit	29	22.79	3	49.78	1	0.915629	2001
Rockmeier	Birgit	28	22.9	4	52.07	6	0.879585	2001
Marahrens	Nicole	24	23.3	5	52.2	7	0.89272	2001
Gosh	Shanta	26	23.3	6	51.25	3	0.909268	2001
Feller	Anke	30	23.53	10	52.56	8	0.895358	2001
Ekpo-Umoh	Florence	24	23.63	11	51.13	2	0.924311	2001
Kette	Nancy	24	23.77	14	52.56	9	0.90449	2001
Kampf	Stephanie	23	23.79	15	54.9	22	0.866667	2001
Rücker	Anja	29	23.98	17	51.55	5	0.930359	2001
Bornscheuer	Andrea	27	24.02	18	54.59	19	0.880015	2001
Marx	Claudia	23	24.03	19	51.41	4	0.934838	2001
Rockmeier	Birgit	29	23.16	3	52.03	5	0.890256	2002
Marahrens	Nicole	25	23.21	4	52.85	7	0.878335	2002
Breuer	Grit	30	23.32	6	50.7	1	0.919921	2002
Ekpo-Umoh	Florence	24	23.84	8	51.79	2	0.920641	2002
Kette	Nancy	25	24	12	51.81	3	0.926462	2002
Feller	Anke	31	24.2	17	52.64	6	0.919453	2002
Marx	Claudia	24	24.2	19	51.86	4	0.933282	2002
Mauritz	Sylvia	22	24.29	21	54.33	18	0.894165	2002
Walper	Andrea	24	24.46	30	54.07	11	0.904753	2002
Hoffmann	Claudia	20	24.33	24	52.91	8	0.919675	2002
Rockmeier	Birgit	30	23.24	3	52.13	2	0.891617	2003
Kampf	Stephanie	25	23.67	8	53.3	8	0.88818	2003
Marahrens	Nicole	26	23.84	9	53.48	9	0.891548	2003
Balkow	Nadine	21	23.96	11	53.27	6	0.899568	2003
Gosh	Shanta	28	23.97	12	52.3	5	0.916635	2003
Marx	Claudia	25	23.99	13	51.68	1	0.928406	2003
Hoffmann	Claudia	21	24.06	15	52.27	4	0.920605	2003
Schulze	Maren	21	24.13	16	54.58	18	0.884207	2003
Neubert	Jana	19	24.27	30	53.98	12	0.899222	2003
Rockmeier	Birgit	31	23.04	1	53.8	12	0.856506	2004
Battke	Sara	19	23.73	6	54.53	17	0.870347	2004
Fink	Korinna	23	23.81	8	53.28	6	0.893769	2004
Marahrens	Nicole	27	23.91	9	53.2	5	0.898872	2004
Pollmächer	Anja	19	23.95	12	53.62	9	0.893323	2004
Marx	Claudia	26	24.02	14	51.88	1	0.925983	2004
Balkow	Nadine	22	24.1	16	53.7	11	0.897579	2004
Neubert	Jana	20	24.15	17	52.38	3	0.922108	2004
Hoffmann	Claudia	22	24.15	18	52.5	4	0.92	2004
Feller	Anke	33	24.22	20	53.51	8	0.905251	2004
Kette	Nancy	27	24.24	22	53.63	10	0.903972	2004
Klauder	Wiebke	26	24.34	29	54.07	13	0.900314	2004
Kron	Tina	24	24.07	11	54.76	14	0.879109	2005
Kruse	Sara	17	24.13	13	55.18	22	0.874592	2005
Marahrens	Nicole	28	24.16	17	55.15	20	0.876156	2005
Hoffmann	Claudia	23	24.33	22	52.5	2	0.926857	2005
Balkow	Nadine	23	24.4	29	53.76	7	0.907738	2005
Pollmächer	Anja	21	23.27	3	52.9	4	0.879773	2006
Marahrens	Nicole	29	24.08	17	54.51	15	0.883508	2006
Balkow	Nadine	24	24.15	19	53.24	7	0.907213	2006
Hoffmann	Claudia	24	24.19	20	51.79	1	0.934157	2006
Schmidt	Lena	17	24.29	27	53.78	8	0.90331	2006
Marahrens	Nicole	30	23.62	5	54.16	12	0.87223	2007
Neubert	Jana	23	23.99	11	53.57	5	0.895651	2007
Fink	Korinna	26	24.05	13	53.12	2	0.905497	2007
Nwachukwu	Sorina	20	24.08	15	54.11	10	0.890039	2007
Haack	Christina	20	24.16	18	53.92	9	0.896142	2007
Tilgner	Jonna	23	24.32	28	53.44	4	0.91018	2007
Pollmächer	Anja	23	23.76	7	54.03	14	0.879511	2008
Schulze	Maren	26	23.85	10	54.04	15	0.882679	2008
Nwachukwu	Sorina	21	24.02	16	52.64	4	0.912614	2008
Haack	Christina	21	24.09	18	55.04	27	0.875363	2008
Cremer	Esther	19	24.15	20	53.44	6	0.903817	2008
Ekpo-Umoh	Florence	31	24.26	24	52.32	3	0.92737	2008
Kron	Tina	27	24.39	27	54.95	25	0.887716	2008
Lindenberg	Janin	21	24.39	28	52.98	5	0.920725	2008
Cremer	Esther	21	23.3	2	53.21	4	0.875775	2009
Nwachukwu	Sorina	22	23.69	6	51.53	1	0.919464	2009
Kohser	Julia	21	24.3	20	54.02	11	0.899667	2009
Cremer	Esther	22	23.1	1	52.16	2	0.885736	2010
Lindenberg	Janin	23	23.82	8	52.2	3	0.912644	2010
Nwachukwu	Sorina	23	23.87	11	53.35	9	0.894845	2010
Seer	Tamara	21	23.99	13	54.49	18	0.880529	2010
Ulmann	Wiebke	22	24.24	27	52.96	5	0.915408	2010
Klopsch	Christiane	20	24.24	28	53.78	12	0.90145	2010
Hoffmann	Claudia	29	23.58	4	52.15	3	0.904314	2011
Cremer	Esther	23	23.59	5	52.08	2	0.905914	2011
Lindenberg	Janin	24	23.69	8	51.97	1	0.91168	2011
Seer	Tamara	22	23.85	13	54.55	17	0.874427	2011
Spelmeyer	Ruth Sophia	21	23.99	19	54.19	9	0.885403	2011
Schmidt	Lena	22	24.18	24	52.62	4	0.919042	2011
Kettenis	Larissa	19	24.35	29	53.52	7	0.90994	2011
Feizbakhsh	Maral	21	24.37	30	54.5	16	0.894312	2011
Cremer	Esther	24	23.25	4	51.76	1	0.898377	2012
Lindenberg	Janin	25	23.47	7	52.29	2	0.897686	2012
Feizbakhsh	Maral	22	23.84	11	53.04	4	0.898944	2012
Klopsch	Christiane	22	24.3	21	53.42	5	0.909772	2012
Schachtschneider	Maike	18	24.34	25	53.57	6	0.908718	2012
Bellerich	Anna-Sophie	17	24.38	26	54.65	17	0.892223	2012
Cremer	Esther	25	23.61	8	51.62	1	0.914762	2013
Jäpel	Sara	24	23.9	14	54.01	10	0.885021	2013
Spelmeyer	Ruth Sophia	23	24.09	21	52.63	2	0.915447	2013
Müller	Laura	18	24.23	25	53.4	4	0.907491	2013
Häfele	Sabrina	20	24.34	29	54.95	28	0.885896	2013
Cremer	Esther	26	23.15	2	51.87	1	0.892616	2014
Müller	Laura	18	23.63	8	52.91	4	0.893215	2014
Nwachukwu	Sorina	27	23.73	9	53.57	9	0.885944	2014
Frommann	Eleni	17	23.86	14	54.51	17	0.875436	2014
Spelmeyer	Ruth Sophia	24	23.99	22	52.69	2	0.910609	2014
Seer	Tamara	25	24.01	23	55.27	29	0.868826	2014
Bellerich	Anna-Sophie	19	24.02	24	55.21	28	0.870132	2014
Schmidt	Lena	25	24.06	27	52.78	3	0.911709	2014
Hoffmann	Lara	23	24.16	28	53.15	6	0.909125	2014
Müller	Laura	19	23.49	8	52.33	2	0.897764	2015
Möhlenkamp	Frederike	23	23.98	20	53.11	5	0.903031	2015
Spelmeyer	Ruth Sophia	25	24.08	25	52.04	1	0.925442	2015
Silies	Maren	23	24.17	30	54.65	21	0.884538	2015
Gonska	Nadine	26	22.79	2	53.39	5	0.853718	2016
Müller	Laura	21	22.81	3	51.69	2	0.882569	2016
Möhlenkamp	Frederike	24	23.51	11	52.55	3	0.894767	2016
Frommann	Eleni	19	23.66	12	55.11	27	0.858646	2016
Schwab	Corinna	17	23.73	16	54.87	25	0.864954	2016
Mergenthale	Hanna	17	24.06	25	53.52	7	0.899103	2016
Gerter	Julia	22	24.11	29	54.3	16	0.888029	2016
Müller	Laura	22	22.65	2	52.04	2	0.870484	2017
Gonska	Nadine	27	22.93	4	52.51	3	0.873357	2017
Schwab	Corinna	18	23.89	19	53.09	7	0.899981	2017
Weit	Inna	12	23.9	22	53.81	13	0.888311	2017
Gerlach	Meike	19	24.1	28	54.5	27	0.884404	2017
Köhrbrück	Svea	24	24.17	30	52.76	4	0.916224	2017
Gonska	Nadine	28	23.14	6.	52	1.	0.89	2018
Krafzik	Carolina	23	23.92	22.	54.39	20.	0.879573	2018
Müller	Laura	23	22.87	2.	52.24	2.	0.875574	2018
Schwab	Corinna	19	23.55	11.	53.14	5.	0.886338	2018
Studzinski	Hanna-Marie	21	23.68	16.	54.33	18.	0.87171	2018
Bulmahn	Luna	20	23.87	17.	52.37	1.	0.911591	2019
Krafzik	Carolina	24	23.53	6.	53.03	8.	0.887422	2019
Müller	Laura	24	23.67	13.	52.75	4.	0.897441	2019
Schwab	Corinna	20	23.77	15.	53.42	10.	0.889929	2019
Spelmeyer	Ruth Sophia	29	23.72	14.	52.79	6.	0.898655	2019
Gonska	Nadine	30	23.74	14.	52.49	6.	0.904553	2020
Krafzik	Carolina	25	23.5	10.	52.82	8.	0.889814	2020
Mayer	Mona	19	23.82	15.	53.43	10.	0.891634	2020
Müller	Laura	25	23.14	3.	52.37	5.	0.883712	2020
Schmidt	Alica	22	24.17	25.	52.21	4.	0.925876	2020
Schwab	Corinna	21	23.23	5.	51.73	1.	0.898125	2020
Spelmeyer	Ruth Sophia	30	23.65	11.	52.15	3.	0.906999	2020
Steinbrecher	Lara-Noelle	17	24.04	20.	54.25	15.	0.886267	2020
Cataria-Byll	Brenda	20	24.08	27.	53.18	12.	0.905604	2021
Gonska	Nadine	31	23.26	9.	52.19	4.	0.891358	2021
Krafzik	Carolina	26	23.47	12.	52.05	2.	0.901825	2021
Mayer	Mona	20	23.66	15.	52.25	6.	0.905646	2021
Müller	Laura	26	23.5	13.	52.2	5.	0.900383	2021
Schmidt	Alica	23	24.14	29.	52.72	8.	0.915781	2021
Schwab	Corinna	22	22.69	1.	51.51	1.	0.880994	2021
Steinbrecher	Lara-Noelle	18	23.93	21.	53.08	10.	0.901658	2021
Franzen	Judith	23	23.37	9.	52.27	3.	0.894203	2022
Hoven	Annkathrin	21	23.78	19.	52.64	6.	0.903495	2022
Müller	Laura	27	23.55	13.	52.66	7.	0.894417	2022
Schier	Skadi	22	23.97	26.	54.13	20.	0.885646	2022
Schmidt	Alica	24	24.15	30.	52.32	4.	0.923165	2022
Schwab	Corinna	23	22.51	1.	50.91	1.	0.884306	2022
Thiel	Luna	23	23.9	23.	51.28	2.	0.932137	2022
