# Supplementary material for: Sex-specific characteristics of special endurance and performance potential in female runners
Source: BMC Res Notes. 2025 Apr 26;18:196. doi: 10.1186/s13104-025-07256-6 (PMC12032771; doi:10.1186/s13104-025-07256-6)
Supplement: Supplementary file 8 — Supplementary Material 8 [file 13104_2025_7256_MOESM8_ESM.xlsx]

## Sheet: Tabelle1
name	first name	age	sec 5000m	placement 5000m	sec 10000m	placement 10000m	KsA value	year
Mai	Christina	22	959.3	1	2030.1	4	0.945077	1983
Hofmann	Elvira	22	979.5	4	1981.3	2	0.988745	1983
Götte	Marion	23	1014.83	10	2106.8	8	0.963385	1983
Niklas	Petra	23	1028.9	14	2157.53	11	0.953776	1983
Lennartz	Birgit	18	1029.9	15	2085	7	0.987914	1983
Menn	Sabine	23	1033.03	16	2163.82	13	0.954821	1983
Lehnich	Rosemarie	26	1038	19	2173	15	0.955361	1983
Kramer	Elke	22	1039.42	20	2218.15	29	0.937195	1983
Reuter	Iris	22	1043	24	2186.8	17	0.953905	1983
Mortier	Simone	19	1047	27	2197.9	22	0.952728	1983
Dietz	Regina	26	1054	29	2209.8	27	0.953932	1983
Hudy	Bernadette	21	1056.48	30	2149.3	10	0.983092	1983
Mai	Christina	23	962.9	2	2030.26	3	0.948548	1984
Lennartz	Birgit	19	999	5	2099.8	11	0.951519	1984
Götte	Marion	24	1000.38	6	2096.84	9	0.954179	1984
Hofmann	Elvira	23	1010.3	8	2130	18	0.948638	1984
Niklas	Petra	24	1012	9	2106.63	12	0.960776	1984
Bruckmann	Margret	24	1013.9	10	2093.9	8	0.968432	1984
Sander	Petra	20	1015.94	11	2139.44	20	0.949725	1984
Pressler	Kerstin	22	1020.55	14	2072.54	7	0.98483	1984
Braun	Jutta	28	1025.4	15	2154.44	24	0.951895	1984
Wilhelm	Silvia	25	1028.28	18	2162.75	27	0.9509	1984
Dietz	Regina	27	1029.9	20	2152.24	22	0.957049	1984
Hermann	Elke	26	1034.2	21	2164.3	29	0.95569	1984
Eibach	Inge	27	1034.7	22	2163	28	0.956727	1984
Fischer	Ingrid	25	1035	23	2167.4	30	0.955061	1984
Teske	Charlotte	36	944.47	1	1963.7	1	0.961929	1985
Wulsch	Sigrid	32	971.63	2	2047	10	0.949321	1985
Wessinghage	Ellen	38	972.97	3	1988.99	2	0.978356	1985
Jamrozy	Ute	21	980.59	4	2015.39	5	0.973102	1985
Mai	Christina	24	981.8	5	2026.8	8	0.968818	1985
Hutterer	Heidi	26	982.9	6	2092.24	18	0.939567	1985
Borgschulze	Claudia	21	985.5	7	2126.58	23	0.92684	1985
Pressler	Kerstin	23	989	8	2038.88	9	0.97014	1985
Franzis	Elisabeth	23	992.38	9	2010.6	4	0.987148	1985
Böker	Steffi	28	992.97	10	2117.78	22	0.937746	1985
Vahlensiek	Christa	36	996.16	12	2019.4	7	0.98659	1985
Schmidt	Astrid	22	996.3	13	2017.1	6	0.987854	1985
Hofmann	Elvira	24	1007.2	14	2089.7	17	0.963966	1985
Lennartz	Birgit	20	1009.9	16	2073.17	13	0.974257	1985
Bruckmann	Margret	25	1011.45	17	2104.62	20	0.961171	1985
Hermann	Elke	27	1012.3	18	2078.85	14	0.973904	1985
Winkelmann	Antje	20	1016.8	20	2088.3	16	0.973806	1985
Niklas	Petra	25	1019.06	21	2110.21	21	0.965838	1985
Schlosser	Doris	41	1025	25	2135	27	0.960187	1985
Michallek	Vera	28	941.68	2	2048	8	0.919609	1986
Pressler	Kerstin	24	948.25	3	1966.24	1	0.964531	1986
Jamrozy	Ute	22	950.64	4	1994.83	4	0.953104	1986
Borgschulze	Claudia	22	965.6	8	2067.11	11	0.934251	1986
Schmidt	Astrid	23	982.6	10	2002.3	5	0.981471	1986
Pohlmann	Antje	18	994.19	14	2081.06	17	0.955465	1986
Franzis	Elisabeth	24	1000.7	15	2030.19	6	0.985819	1986
Grüner	Olivia	17	1002.41	16	2067.32	12	0.969768	1986
Wolf	Gaby	26	1009.64	17	2078.15	15	0.971672	1986
Fischer	Ingrid	25	1010.5	18	2134.2	28	0.946959	1986
Hofmann	Elvira	25	1017.2	21	2116.4	24	0.961255	1986
Mrusek	Gudrun	34	1018.8	23	2095.77	20	0.972244	1986
Kalinowski	Tanja	18	1023.1	25	2080.74	16	0.9834	1986
Lehmann	Eva-Maria	28	1023.5	26	2077.37	14	0.985381	1986
Müller	Susanne	22	1028.79	28	2107.02	21	0.976536	1986
Knetsch	Sabine	21	935.13	1	2000.52	7	0.934887	1987
Teske	Charlotte	38	938.3	2	1955.1	3	0.959849	1987
Winkelmann	Antje	22	949.6	3	2050.42	11	0.926249	1987
Mai	Christina	26	950.15	4	2017.85	9	0.941745	1987
Wulsch	Sigrid	34	961.89	5	1992.05	5	0.965729	1987
Schmidt	Astrid	24	966.87	7	2017.68	8	0.958398	1987
Biba	Iris	23	972.85	8	1994.29	6	0.975635	1987
Borgschulze	Claudia	23	974.46	9	1991.96	4	0.978393	1987
Pressler	Kerstin	25	979.1	10	1916.8	1	1.0216	1987
Lehmann	Eva-Maria	29	1003.8	14	2116.64	18	0.948484	1987
Wolf	Gaby	27	1007.91	15	2092.08	14	0.963548	1987
Niklas	Petra	27	1010	17	2051.59	12	0.984602	1987
Wilhelm	Silvia	28	1012.5	21	2130.56	20	0.950454	1987
Zarniko	Tanja	18	1012.7	22	2151.32	29	0.941468	1987
Kalinowski	Tanja	19	1024.6	26	2108.48	16	0.971885	1987
Knudsen	Dagmar	31	1025.6	27	2086.8	13	0.98294	1987
Röhmbacher	Inge	44	1027	28	2138.1	24	0.960666	1987
Kramer	Elke	26	1029.4	29	2126.1	19	0.968346	1987
Borgschulze	Claudia	28	946.19	1	1963.64	5	0.96371	1992
Schäfer	Monika	33	952	2	1967.84	6	0.967558	1992
Kalinowski	Tanja	24	971.55	4	1988.36	8	0.977238	1992
Mann	Sabine	27	981.59	7	2066.9	15	0.949819	1992
Fischer	Ingrid	31	987.79	9	2054.18	13	0.961737	1992
Vetter	Heidrun	31	991.57	10	2052.6	11	0.96616	1992
Baumgartner	Johanna	32	996.77	12	2067.86	16	0.964059	1992
Alfen	Astrid	29	998.68	13	2078.52	20	0.960953	1992
Pohlmann	Antje	24	1000.86	15	2125.94	30	0.941569	1992
Köster	Dörte	19	1008.63	19	2059.36	14	0.979557	1992
Manz	Veronika	33	1013.5	20	2100.72	25	0.964907	1992
Östringer	Maren	18	1015.76	21	2125.86	29	0.955623	1992
Liebich	Kristin	18	1017.78	22	2077.53	19	0.979798	1992
Lange	Peggy	19	1018.87	23	2096.31	23	0.97206	1992
Hornung	Susanne	18	1032.5	29	2099.9	24	0.98338	1992
Welt	Silke	26	1037.7	30	2118.4	27	0.979702	1992
Pipping	Uta	28	915.04	1	1881.7	1	0.972567	1993
Lokar	Claudia	29	916.16	2	1905.53	3	0.96158	1993
Weßel	Kathrin	26	920.32	3	1900.52	2	0.968493	1993
Dreher	Claudia	22	933.83	4	1947.2	4	0.959152	1993
Metzner	Claudia	27	954.3	6	1923.18	5	0.992419	1993
Herzberg	Kerstin	27	959	7	1988.4	6	0.964595	1993
Kalinowski	Tanja	25	971.12	8	1994.8	7	0.973651	1993
Alfen	Astrid	30	992.53	11	2039.82	12	0.973154	1993
Sander-Maak	Petra	29	993.6	12	2081.7	18	0.954604	1993
Pohlmann	Antje	25	998.82	13	2113.6	24	0.945136	1993
Köster	Dörte	20	1000.72	14	2038.44	10	0.981849	1993
Renz	Sylvia	24	1004.4	16	2068.84	15	0.970979	1993
Baumgartner	Johanna	23	1006	17	2086.58	19	0.964257	1993
Lefering	Jutta	21	1009.68	20	2137.4	30	0.944774	1993
Fischer	Ingrid	32	1009.98	21	2040.5	13	0.989934	1993
Liebertz	Petra	33	1012.8	23	2096.74	21	0.966071	1993
Lehmann	Martina	26	1013.96	24	2120.74	27	0.956232	1993
Schmidt	Friederike	20	1015.3	26	2038.62	11	0.996066	1993
Weßel	Kathrin	27	910.84	1	1898.75	1	0.95941	1994
Lokar	Claudia	30	916.92	2	1928.74	2	0.950797	1994
Dreher	Claudia	23	941.23	3	1974.86	4	0.953212	1994
Metzner	Claudia	28	950.29	4	1949.86	3	0.974726	994
Pohlmann	Antje	26	973.98	5	2076.85	17	0.93794	1994
Hanner	Elisabeth	28	978.98	8	2033.36	10	0.962919	1994
Maak	Petra	30	989.85	10	2071.1	16	0.955869	1994
Grossert	Doris	33	990.2	11	1996.8	7	0.991787	1994
Kraus	Melanie	20	997.1	12	2016.42	8	0.98898	1994
Schmidt	Friederike	21	999.6	14	2057.19	13	0.971811	1994
Kalinowski	Tanja	26	1012.07	19	2035.6	11	0.99437	1994
Soeder	Stefanie	23	1013.31	20	2133.96	25	0.949699	1994
Jenke	Ute	30	1014.7	22	2169.95	29	0.935229	1994
Wolf	Ursula	31	1015.5	23	2124.8	22	0.955855	1994
Friedrichsen	Karen	21	1016.06	24	2106.49	20	0.964695	1994
Renz	Sylvia	25	1027.88	28	2060.38	14	0.997758	1994
Lehmann	Martina	27	1028.3	29	2104.6	19	0.977193	1994
Lokar	Claudia	31	907.42	1	1917.9	2	0.946264	1995
Weßel	Kathrin	28	921.41	2	1915.04	1	0.962288	1995
Schäfer	Monika	36	923.46	3	1974.7	4	0.935291	1995
Pippig	Uta	30	927.32	4	1934.66	3	0.958639	1995
Dreher	Claudia	24	947.43	7	1989.2	5	0.952574	1995
Köster	Dörte	22	940.1	9	2057.88	8	0.913659	1995
Kraus	Melanie	21	949.64	12	2019.31	6	0.940559	1995
Wolf	Kathrin	29	957.9	13	2118.62	14	0.904268	1995
Riemann	Sandra	22	962.34	17	2058.32	9	0.935073	1995
Kalinowski	Tanja	27	962.91	18	2078.28	10	0.926641	1995
Hanner	Elisabeth	29	973.01	21	2033.04	7	0.957197	1995
Östringer	Maren	21	981.24	24	2159.86	21	0.908614	1995
Dressel	Daniela	32	984.77	25	2094.06	12	0.940537	1995
Baumgartner	Johanna	35	988.57	29	2102.3	13	0.940465	1995
Weßel	Kathrin	29	911.39	1	1911.41	1	0.953631	1996
Wassiluk	Petra	27	915.17	2	1999.56	6	0.915371	1996
Köster	Dörte	23	916.32	3	1966.63	4	0.931868	1996
Biba	Iris	32	826.24	5	1936.45	2	0.853355	1996
Dreher	Claudia	25	946.39	7	1961.9	3	0.964769	1996
Kraus	Melanie	22	952.26	10	1983.4	5	0.96023	1996
Fischer	Ingrid	35	989.97	12	2111.46	14	0.937711	1996
Kalinowski	Tanja	28	990.29	13	2059.25	9	0.961797	1996
Engelen	Katrin	20	990.3	14	2148.2	21	0.921981	1996
Veith	Manuela	22	991.65	15	2140.57	18	0.926529	1996
Jeck	Saskia	20	991.71	16	2117.7	15	0.936592	1996
Baumgartner	Johanna	36	992.61	17	2064.8	10	0.961459	1996
Hanner	Elisabeth	30	993.4	18	2094.73	12	0.948475	1996
Dressel	Daniela	33	996.77	20	2122.36	17	0.939303	1996
Maak	Petra	32	997.19	21	2092.06	11	0.953309	1996
Willcox	Victoria	23	1007.49	24	2118.54	16	0.951117	1996
Östringer	Maren	22	1009.25	25	2059.08	8	0.980292	1996
Liedtke	Monika	30	1016.3	30	2182.5	28	0.931317	1996
Zaituc	Luminita	29	933.47	2	1961.03	4	0.95202	1997
Köster	Dörte	24	946.13	4	1996.23	6	0.947917	1997
Kraus	Melanie	23	954.02	6	1961.4	5	0.972795	1997
Holzschuh	Andrea	34	969.96	7	1999.38	7	0.970261	1997
Oberem	Sonja	24	974.11	8	1959.5	3	0.994243	1997
Ortega Sawal	Tanja	29	990.17	13	2030.35	9	0.975369	1997
Hanner	Elisabeth	31	991.43	14	2075.8	14	0.955227	1997
Östringer	Maren	23	992.12	15	2049.76	11	0.968035	1997
Baumgartner	Joahnna	37	993.6	17	2037	10	0.975552	1997
Willcox	Victoria	24	994.22	18	2071.82	13	0.959755	1997
Möller	Michaela	24	998.82	19	2085.32	15	0.957954	1997
Bultmann	Birte	23	1011.01	24	2137.06	19	0.946169	1997
Cronjäger	Ines	20	1012.4	25	2070.4	12	0.977975	1997
Mikitenko	Irina	26	918.86	3	1930.61	1	0.951886	1998
Kraus	Melanie	24	941.89	4	1953.62	2	0.964251	1998
Möller	Michaela	25	959.26	5	2065.84	8	0.928688	1998
Östringer	Maren	24	977.03	9	2022.62	5	0.966103	1998
Ortega Sawal	Tanja	30	981.27	11	2054.2	6	0.955379	1998
Renz	Sylvia	29	987.34	12	2000	3	0.98734	1998
Baumgartner	Johanna	38	997.65	16	2059.51	7	0.968823	1998
Willcox	Victoria	25	1000.03	17	2134.34	12	0.937086	1998
Soeder	Christiane	23	1002.75	19	2159.84	14	0.928541	1998
Riemann	Sandra	25	1003.61	21	2094.48	9	0.958338	1998
Dressel	Daniela	35	1017.71	26	2161.56	15	0.941644	1998
Hanner	Elisabeth	32	1020.87	30	2107.82	10	0.96865	1998
Mikitenko	Irina	27	882.03	1	1998.68	1	0.882613	1999
Möller	Michaela	26	939.12	3	2004.43	3	0.937044	1999
Schulz	Melanie	20	974.32	9	2056.88	4	0.947377	1999
Cronjäger	Ines	22	993.01	16	2202.09	30	0.90188	1999
Willcox	Victoria	26	1002.91	21	2139.5	17	0.937518	1999
Kramer	Sandra	26	1004.17	22	2118.42	10	0.948037	1999
Bultmann	Birte	25	1007.44	23	2102.36	7	0.95839	1999
Carlsohn	Anja	21	1014.15	25	2129.02	12	0.952692	1999
Badnjar	Veronika	31	1014.38	26	2115.7	8	0.958907	1999
Kraus	Melanie	25	945.02	4	1932.4	2	0.978079	1999
Mockenhaupt	Sabrina	20	951.67	2	1992.97	4	0.955027	2000
Möller	Michaela	27	952.3	4	1951.91	3	0.975762	2000
Kraus	Melanie	26	958.05	5	1941.31	2	0.987014	2000
Ritter	Susanne	22	962.49	6	2004.33	7	0.960411	2000
Schulz	Melanie	21	968.02	8	2000.09	6	0.967976	2000
Kleinmann	Larissa	22	972.98	10	2000.05	5	0.972956	2000
Maisch	Ulrike	23	999.4	16	2079.07	11	0.961391	2000
Willcox	Victoria	27	1003.35	17	2111.14	17	0.950529	2000
Kupper	Andrea	20	1006.72	20	2085.69	13	0.965359	2000
Stief	Christine	29	1007.63	21	2134.7	19	0.944048	2000
Siewert	Carmen	28	1008.64	22	2099.49	14	0.960843	2000
Bultmann	Birte	26	1011.37	23	2100.37	15	0.96304	2000
Renz	Sylvia	31	1013.4	25	2149.6	22	0.942873	2000
Holletschek	Kirsten	29	1015.48	26	2081.49	12	0.975724	2000
Engelen	Katrin	24	1017.61	27	2077.65	10	0.979578	2000
Maier	Stephanie	21	1022.76	29	2180	24	0.938312	2000
Zipse	Manuela	26	1023.48	30	2074.95	9	0.986511	2000
Mikitenko	Irina	29	893	1	1989.55	1	0.89769	2001
Zaituc	Luminita	33	941.39	2	1955.9	2	0.962616	2001
Mockenhaupt	Sabrina	21	950.13	3	1958.9	3	0.970065	2001
Kraus	Melanie	27	954.93	4	1971.07	5	0.968946	2001
Schulz	Melanie	22	945.52	6	1995.9	6	0.947462	2001
Bultmann	Birte	27	964.5	9	2101.55	11	0.917894	2001
Maak	Petra	37	1003.22	15	2081.2	10	0.964078	2001
Cronjäger	Ines	24	1007.05	18	2039.14	7	0.98772	2001
Schöner	Ellen	33	1013.29	21	2101.58	12	0.964313	2001
Maier	Stephanie	23	1018.05	25	2117.66	15	0.961486	2001
Knoke	Katrin	20	1018.41	26	2111.97	14	0.964417	2001
Willcox-Heidner	Victoria	28	1020.4	27	2105.43	13	0.969303	2001
Schuri	Monika	32	1021.84	29	2118.43	16	0.964714	2001
Mockenhaupt	Sabrina	22	916.32	1	1928.52	1	0.950283	2002
Schulz	Melanie	23	931.67	2	1960.09	2	0.95064	2002
Ritter	Susanne	24	955.75	4	2052.69	4	0.931217	2002
Bultmann	Birte	28	958.84	5	2037.6	3	0.941146	2002
Willcox-Heidner	Victoria	29	963.06	6	2105.87	11	0.914643	2002
Maisch	Ulrike	25	964.21	7	2079.63	6	0.92729	2002
Siewert	Carmen	30	970.08	9	2083.39	7	0.931251	2002
Maier	Stephanie	23	974.81	10	2075.1	5	0.939531	2002
Schuri	Monika	33	987.94	13	2110.84	12	0.936063	2002
Güldemeister	Nicole	20	994.59	18	2097.68	9	0.948276	2002
Knoke	Katrin	21	994.64	20	2088.85	8	0.952333	2002
Hofmann	Fajka	22	1020.01	22	2171.84	17	0.939305	2002
Stucke	Kathrin	21	1020.31	23	2226.44	24	0.916539	2002
Eidenberger	Helene	36	1028.21	27	2137.21	14	0.962198	2002
Engelen	Katrin	26	1009.91	28	2116.2	13	0.954456	2002
Heese	Carmen	32	1033.34	30	2152.44	15	0.960157	2002
Mikitenko	Irina	31	836.64	1	1897.15	1	0.881997	2003
Mockenhaupt	Sabrina	23	909.8	2	1931.95	2	0.941846	2003
Maier	Stephanie	24	973.77	4	2072.27	7	0.93981	2003
Schulz	Melanie	24	991.61	7	2028.5	3	0.977678	2003
Heinze	Judith	22	995.92	9	2120.03	11	0.939534	2003
Güldemeister	Nicole	21	1003.77	10	2056.71	5	0.976093	2003
Siewert	Carmen	31	1008.15	11	2086.24	9	0.966476	2003
Schuri	Monika	34	1010.63	13	2088.31	10	0.967893	2003
Renz	Sylvia	34	1021.7	22	2041.83	4	1.00077	2003
Schäffer	Viola	29	1022.96	24	2085.73	8	0.980913	2003
Schedler	Michaela	21	1024.9	26	2062.36	6	0.99391	2003
Mikitenko	Irina	32	895.43	1	1924.86	2	0.930385	2004
Mockenhaupt	Sabrina	24	903.47	2	1883.35	1	0.959429	2004
Maisch	Ulrike	27	958.17	3	2024.78	5	0.946444	2004
Ritter	Susanne	26	968.96	4	1999.82	3	0.969047	2004
Trost	Eva	36	971.5	5	2115.58	13	0.918424	2004
Schuri	Monika	35	973.98	6	2070.23	8	0.940939	2004
Schedler	Michaela	22	980.07	8	2045.59	6	0.958227	2004
Byrd	Andreina	26	986.62	10	2105.92	12	0.936997	2004
Willcox-Heidner	Victoria	31	988.31	23	2162.59	20	0.914006	2005
Heilig-Duventäster	Marie-Luise	43	1021.11	19	2195.93	28	0.930002	2004
Schley	Katherina	24	1021.48	20	2125.18	14	0.961312	2004
Schäffer	Viola	30	1029.03	24	2066.33	7	0.995998	2004
Kemmerer	Anke	36	1033.82	25	2161.16	18	0.956727	2004
Tsegaw	Tehetena	17	1039.07	29	2185.58	25	0.950841	2004
Mockenhaupt	Sabrina	25	909.39	1	1881.28	1	0.966778	2005
Schuri	Monika	36	959.91	4	2072.62	4	0.926277	2005
Schedler	Michaela	23	961.04	5	2036.02	3	0.944038	2005
Stöwer	Eva-Maria	20	962.91	6	2008.28	2	0.95894	2005
Restle	Simret	21	964.49	7	2196.8	12	0.878086	2005
Ulrich	Veronika	37	993.5	15	2216.42	16	0.896491	2005
Schaedel	Dagmar	28	997.35	18	2155.72	10	0.925306	2005
Stengel	Andrea	34	1020.03	21	2136.44	7	0.954888	2005
Güldemeister	Nicole	23	1022.6	23	2267.2	29	0.902082	2005
Korsten	Ira	25	1024.36	24	2264.89	27	0.904556	2005
Schley	Kartherina	25	1025.15	26	2091.83	5	0.980147	2005
Bott	Alexandra	26	1028.19	28	2247.3	24	0.915045	2005
Dreißigacker	Ulrike	21	1028.3	29	2234.4	21	0.920426	2005
Mockenhaupt	Sabrina	26	911.38	1	1900.28	1	0.959206	2006
Mikitenko	Irina	34	928	2	1904.82	2	0.97437	2006
Restle	Simret	22	954.31	4	2076.89	6	0.91898	2006
Schnabel	Anja	21	969.9	6	2089.27	8	0.928458	2006
Dreißigacker	Ulrike	22	984.98	10	2145.99	12	0.917973	2006
Schulz	Melanie	27	986.94	11	2137.7	10	0.923366	2006
Beckmann	Stephanie	27	988.63	12	2034.1	3	0.972056	2006
Güldemeister	Nicole	24	991.65	16	2047.99	4	0.968413	2006
Schedler	Michaela	24	991.91	17	2050.05	5	0.967693	2006
Ulrich	Veronika	38	998.78	21	2175.58	15	0.918174	2006
Schleifer	Christine	25	1027.12	25	2178.4	17	0.943004	2006
Schaedel	Dagmar	29	1030.67	27	2149.82	13	0.958843	2006
Stengel	Andrea	35	1033.18	28	2161.03	14	0.956192	2006
Mockenhaupt	Sabrina	27	910.32	1	1916.09	1	0.950185	2007
Restle	Simret	23	947.71	2	2045.56	3	0.926602	2007
Becker	Katharina	21	978.93	7	2178.97	12	0.898525	2007
Güldemeister	Nicole	25	985.41	10	2074.33	5	0.9501	2007
Beckmann	Stephanie	28	992.42	14	2070.44	4	0.958656	2007
Schulz	Melanie	28	994.31	18	2116.1	6	0.939757	2007
Ulrich	Veronika	39	999.17	21	2156.76	10	0.926547	2007
Byrd	Andreina	29	999.91	22	2145.13	8	0.932261	2007
Dobmeier	Christiane	39	1030.55	24	2141.09	7	0.962641	2007
Schüler	Nina	27	1045.91	29	2299.38	30	0.909732	2007
Mockenhaupt	Sabrina	28	927.08	1	1874.21	1	0.989302	2008
Restle	Simret	24	958.32	4	2010.31	3	0.953405	2008
Viellehner	Julia	23	968.9	6	2097.27	6	0.923963	2008
Heuck	Ingalena	22	975.93	8	2083.07	4	0.937011	2008
Bienstein	Heike	22	978.18	9	2083.53	5	0.938964	2008
Siewert	Carmen	36	982.6	10	2108.7	7	0.931949	2008
Schulz	Melanie	29	998.37	15	2114.6	9	0.944264	2008
Schüler	Nina	28	1020.1	17	2144.7	10	0.951275	2008
Bokern	Kristina	22	1026.85	24	2111.78	8	0.972497	2008
Mockenhaupt	Sabrina	29	899.88	1	1887.56	1	0.953485	2009
Restle	Simret	25	959.87	2	2067.05	3	0.928734	2009
Bultmann	Birte	35	952.07	4	2093.48	4	0.909557	2009
Lutz	Susi	22	952.84	5	2100.52	5	0.907242	2009
Schulz	Melanie	30	969.87	13	2035.75	2	0.952838	2009
Harrer	Corinna	18	1008.94	20	2193.29	16	0.920024	2009
Hahner	Lisa	20	1014.05	24	2152.16	12	0.942356	2009
Kröckert	Christina	20	1016.25	25	2118.31	8	0.959491	2009
Gatzweiler	Ursula	21	1019.03	26	2158.95	14	0.944005	2009
Siewert	Carmen	37	1020.32	28	2157.76	13	0.945724	2009
Mockenhaupt	Sabrina	30	906.93	1	1883.86	1	0.962842	2010
Restle	Simret	26	960.8	2	1986.84	3	0.967164	2010
Kröckert	Christina	21	965.96	3	2047.43	5	0.943583	2010
Hahner	Anna	21	990.88	9	2088.62	8	0.948837	2010
Heuck	Ingalena	24	993.18	10	2010.25	4	0.988116	2010
Lutz	Susi	21	999.81	11	2051.45	6	0.974735	2010
Harrer	Corinna	19	1007.04	14	2103.91	10	0.957303	2010
Bühler	Sigrid	31	1010.55	16	2141.9	13	0.943601	2010
Hahner	Lisa	21	1011.07	17	2173.51	20	0.930357	2010
Kallenberg	Frederike	27	1012.7	20	2157.53	16	0.938759	2010
Schüler	Nina	30	1012.76	21	2192.72	24	0.923748	2010
Siewert	Carmen	38	1019.74	26	2097.73	9	0.972232	2010
Mockenhaupt	Sabrina	31	924.3	1	1904.52	1	0.970638	2011
Pohl	Veronica	26	963.99	5	2039.02	3	0.945542	2011
Soethout	Jana Janine	22	975.51	6	2121.95	10	0.919447	2011
Kröckert	Christina	22	984.39	7	2096.14	7	0.939241	2011
Hahner	Lisa	22	990.4	8	2052.05	4	0.965279	2011
Stöcker	Nina	19	995.56	9	2107.38	8	0.944832	2011
Kallenberg	Frederike	28	999.42	11	2113.61	9	0.9457	2011
Aehling	Carolin	22	1012.18	17	2165.92	14	0.934642	2011
Gatzweiler	Ursula	23	1012.79	18	2169.5	15	0.933662	2011
Bienstein	Heike	25	1033.08	28	2257.65	22	0.915182	2011
Günther	Marlen	28	1035.31	29	2211.36	18	0.936356	2011
Mockenhaupt	Sabrina	32	916.89	1	1896.76	1	0.966796	2012
Kock	Maren	22	927.65	2	2009.14	4	0.92343	2012
Restle-Apel	Simret	28	928.71	3	1961.5	2	0.946939	2012
Hahner	Lisa	23	949.83	5	2018.49	5	0.941129	2012
Soethout	Jana Janine	23	983.86	9	2037.53	6	0.965738	2012
Kallenberg	Frederike	29	1002.19	11	2101.22	10	0.953912	2012
Heuck	Ingalena	26	1009.4	17	2096.38	9	0.962993	2012
Hilschenz	Marina	31	1016.41	20	2089.62	8	0.972818	2012
Totzke	Juliane	21	1017.17	21	2183.93	22	0.931504	2012
Volke	Steffi	36	1022.58	23	2131.18	12	0.959637	2012
Ressing	Mareike	42	1032.73	28	2154.33	14	0.958748	2012
Mockenhaupt	Sabrina	33	932.73	1	1933.64	1	0.96474	2013
Kock	Maren	23	952.12	2	2074.3	6	0.918016	2013
Soethout	Jana Janine	24	979.22	5	2047.61	5	0.956452	2013
Aehling	Carolin	24	984.18	6	2044.35	4	0.962829	2013
Klein-Arndt	Melanie	38	1005.06	12	2159.3	16	0.930913	2013
Volke	Steffi	37	1005.61	13	2086.89	7	0.96374	2013
Walloch	Christina	33	1017.1	20	2130.66	12	0.954728	2013
Schön	Maike	24	1022.39	23	2146.36	14	0.952673	2013
Viebahn	Christel	37	1025.49	29	2092.52	8	0.980148	2013
Mockenhaupt	Sabrina	34	918.53	1	1949.26	2	0.94244	2014
Harrer	Corinna	23	941.73	3	1947.75	1	0.966993	2014
Kock	Maren	24	922.75	2	1994.32	4	0.925378	2014
Bechtloff	Mareike	24	988.3	13	2093.06	9	0.944359	2014
Gomell	Annika	23	994.24	14	2088.62	7	0.952054	2014
Stemper	Melanie	23	1004.86	17	2132.25	15	0.942535	2014
Reng	Franziska	18	1006.25	19	2164.62	20	0.929724	2014
Volke	Steffi	38	1006.96	20	2060.17	5	0.97755	2014
Teegen	Isabell	22	964.45	5	2062.73	4	0.93512	2015
Hottenrott	Laura	23	967.21	6	2136.88	9	0.905254	2015
Gomell	Annika	24	973.74	8	2034.72	3	0.957124	2015
Högl	Regina	22	985.26	15	2109.15	8	0.934272	2015
Tränkle	Melina	23	985.92	16	2069.7	5	0.952718	2015
Reng	Franziska	19	997.75	20	2140.53	10	0.932246	2015
Soethout	Jana Janine	26	1000.18	24	2010.3	1	0.995055	2015
Leibfried	Isabell	24	1015.48	30	2087.49	6	0.97292	2015
Mockenhaupt	Sabrina	36	940.03	5	1960.8	1	0.958823	2016
Hottenrott	Laura	24	955.87	8	2023.41	2	0.944811	2016
Mattern	Carolin	33	1000.44	20	2145.79	7	0.932468	2016
Aehling	Carolin	27	1007.34	22	2153.05	10	0.935733	2016
Grießbaum	Tanja	24	1008.18	23	2205.4	18	0.914283	2016
Hundeborn	Inga	20	1011.31	25	2163.5	13	0.934883	2016
Plinke	Anna-Katharina	28	1016.78	28	2190.69	16	0.928274	2016
Brandt	Victoria	27	1016.86	29	2215.44	20	0.917976	2016
Mockenhaupt	Sabrina	35	949.77	5	1968.37	1	0.965032	2017
Dattke	Miriam	19	965.88	8	2081.94	7	0.927865	2017
Heim	Thea	25	968.34	9	2028.73	2	0.954627	2017
Schulte	Tatjana	20	973.98	13	2055.14	4	0.947848	2017
Harrer	Corinna	26	987.34	18	2035.47	3	0.970135	2017
Brandt	Victoria	28	1000.13	20	2167.49	21	0.922846	2017
Schöneborn	Deborah	23	1000.43	21	2099.46	12	0.953036	2017
Körner	Felicia	21	1004.87	23	2067.6	5	0.972016	2017
Rappold	Marina	20	1014.14	29	2139.13	15	0.94818	2017
Dattke	Miriam	20	944.41	7.	1960.58	5.	0.963399	2018
Gehring	Anna	22	973.29	16.	1940.37	2.	1.0032	2018
Hanle	Leah	21	963.14	12.	2023.95	7.	0.951743	2018
Heim	Thea	26	973.15	15.	2075.4	10.	0.937795	2018
Mayer	Domenika	28	998.2	20.	2097.99	12.	0.951577	2018
Mockenhaupt	Sabrina	38	963.02	11.	1958.22	4.	0.983567	2018
Ojstersek	Svenja	24	1004.85	25.	2094.72	11.	0.959412	2018
Rappold	Marina	21	1000.2	22.	2128.24	16.	0.939932	2018
Reh	Alina	21	925.3	4.	1937.17	1.	0.955311	2018
Sabrié (FRA)	Anais	24	1012.75	29.	2134.87	19.	0.94877	2018
Schöneborn	Deborah	24	949.81	9.	2017.48	6.	0.941581	2018
Schöneborn	Rabea	24	998.58	21.	2029.46	9.	0.984084	2018
Tanner	Natalie	23	955.86	10.	1956.15	3.	0.977287	2018
Dattke	Miriam	21	940.61	4.	1949.45	2.	0.965	2019
Fischer	Katja	28	995.24	25.	2116.65	17.	0.940392	2019
Gerdes	Christina	24	986.8	17.	2084.64	11.	0.946734	2019
Gröber	Hanna	23	1004.86	30.	2095.23	12.	0.959188	2019
Hanle	Leah	22	962.46	6.	2028.83	6.	0.948783	2019
Oed	Lisa	20	979.77	12.	2049.07	9.	0.956307	2019
Ojstersek	Svenja	25	986.94	18.	2025.08	5.	0.974717	2019
Pingpank	Svenja	23	973.44	11.	2046.34	8.	0.951396	2019
Reh	Alina	22	904.1	2.	1879.87	1.	0.961875	2019
Schöneborn	Deborah	25	965.32	8.	2049.38	10.	0.942061	2019
Tertsch	Lisa	21	963.15	7.	2105.32	14.	0.914968	2019
Heckel	Emma	18	1012.66	22.	2107.82	7.	0.96086	2020
Islinger	Marlene Gomez	27	994.29	9.	2079.82	6.	0.956131	2020
Kümpers	Julia	28	1027.59	28.	2174.44	11.	0.945154	2020
Mayer	Domenika	30	959.44	3.	1965.81	1.	0.976127	2020
Moser	Tania	30	1000.63	14.	2079.12	5.	0.962551	2020
Ojstersek	Svenja	26	1021.89	27.	2118.45	8.	0.964753	2020
Rosenberg	Sophia	24	1021.59	26.	2132.55	9.	0.958092	2020
Schöneborn	Rabea	26	974.2	7.	2017.84	2.	0.965587	2020
Tertsch	Lisa	22	996.69	11.	2019.13	3.	0.987247	2020
Althaus	Franziska	23	976.51	16.	2053.48	10.	0.951078	2021
Dattke	Miriam	23	928.37	5.	1893.77	2.	0.980446	2021
Dieterich	Eva	22	967.21	13.	2019.31	8.	0.957961	2021
Dörfel	Blanka	19	956.74	10.	2034.69	9.	0.940428	2021
Kleine	Linn Lara	20	984.04	21.	2059.42	12.	0.955648	2021
Klosterhalfen	Konstanze	24	875.88	1.	1861.71	1.	0.940941	2021
Mayer	Domenika	31	952.95	8.	1997.89	5.	0.953956	2021
Oed	Lisa	22	1000.37	28.	2015.99	7.	0.992435	2021
Pingpank	Svenja	25	968.47	14.	2009.84	6.	0.963728	2021
Ritter	Celine	23	958.77	11.	2134.63	15.	0.898301	2021
Schöneborn	Rabea	27	953.88	9.	1975.96	3.	0.965485	2021
Schöneborn	Deborah	27	959.08	12.	1982.87	4.	0.967365	2021
Althaus	Franziska	24	993.99	24.	2132.89	26.	0.932059	2022
Benfares	Selma	23	974.29	14.	2042.63	15.	0.953956	2022
Dieterich	Eva	23	940.16	7.	1945.7	4.	0.966398	2022
Heckel	Emma	20	952.78	8.	1985.02	7.	0.95997	2022
Kaiser	Céline	24	979.75	16.	2041.18	14.	0.959984	2022
Klosterhalfen	Konstanze	25	877.94	1.	1865.21	1.	0.941385	2022
Kümpers	Julia	30	981.56	19.	2035.27	13.	0.96455	2022
Oed	Lisa	23	973.46	13.	2010.88	10.	0.968193	2022
Ojstersek	Svenja	28	972.15	11.	2080.38	19.	0.934589	2022
Pingpank	Svenja	26	962.67	9.	1988.72	8.	0.96813	2022
Reh	Alina	25	906.29	3.	1899.86	2.	0.95406	2022
Ritter	Celine	24	973.05	12.	2022.9	12.	0.962035	2022
Stahl	Jasmina	20	1002.84	29.	2051.12	16.	0.977846	2022
