# Supplementary material for: Sex-specific characteristics of special endurance and performance potential in female runners
Source: BMC Res Notes. 2025 Apr 26;18:196. doi: 10.1186/s13104-025-07256-6 (PMC12032771; doi:10.1186/s13104-025-07256-6)
Supplement: Supplementary file 9 — Supplementary Material 9 [file 13104_2025_7256_MOESM9_ESM.xlsx]

## Sheet: 100-200
name, first name	year of birth	club	sec 100m	sec 200m	KsA
Arndt, Pauline	1997	SV Preußen Reinfeld	12.33	25.16	0.980127
Auch, Christina	1983	MTV Wilster	12.11	24.99	0.969188
Baganz, Angela	1959	ETSV Gut Heil Itzehoe	12.3	24.89	0.988349
Becker, Gabriele	1962	Ahrensburger TSV	12.44	25.04	0.99361
Beiersdorf, Astrid	1961	TSV Rot-Weiß Niebüll	12.14	25.34	0.958169
Bellerich, Anna-Sophie	1995	SC Rönnau 74	12	24.02	0.999167
Borchers, Laura	1992	LG Rendsburg/Büdelsdorf	12.33	25.64	0.961778
Bornholdt, Manon	1950	SV Wahlstedt	11.9	25.04	0.950479
Brodbeck, Birgit	1974	SC Rönnau 74	11.87	24.2	0.980992
Dannenberg, Margrit	1950	LBV Phönix Lübeck	12.44	25.64	0.970359
Dickow, Claudia	1963	LG Kiel	12.03	24.23	0.992984
Eichler, Britta	1963	LG GH Neum./TSV Kronshagen	12.4	25.54	0.971026
Elsler, Josefina	1991	TSV Bordesholm	11.91	24.21	0.983891
Fick, Ulrike	1959	TWG Ostholstein	12.34	25.64	0.962559
Friedrich, Franka	1980	TSV Altenholz	12.19	25.66	0.950117
Galjan, Cornelia	1985	SG TSV Kronshagen/Kieler TB	12.3	25.41	0.968123
Groth, Gabriela	1975	MTV Heide	12.46	25.28	0.985759
Gülzow, Tanja	1974	Kieler TB	12.08	24.65	0.980122
Hack, Sabine	1958	TSV Reinbek	12	25.04	0.958466
Harder, Darlene	1994	LG Reinbek/Ohe	12.32	25.39	0.970461
Heil, Sabrina	2003	TSV St. Peter-Ording	12.41	25.3	0.981028
Heinemann, Franziska	1951	Kieler TB	12.14	25.64	0.946958
Heinemann, Nina	1996	TSV Altenholz	12.38	25.7	0.963424
Heinzel, Julia	1996	Wellingdorfer TV	11.7	24.2	0.966942
Heitmann, Silke	1957	LG GH Neum./TSV Kronshagen	12.24	24.84	0.985507
Hofmeister, Carina	1993	SV Großhansdorf	12.27	25.01	0.981208
Hutfilz, Larissa	1998	LG Tönning/St. Peter	12.31	25.06	0.982442
Hüttmann, Helga	1940	KSV Holstein Kiel	11.94	24.94	0.957498
Kappert, Benita	2002	SC Wentorf	12.34	25.18	0.980143
Kappler, Bianca	1977	Halstenbeker TS	12.01	24.36	0.986043
Käther, Nadja	1988	Ahrensburger TSV	12.08	24.95	0.968337
Kelch, Birgit	1961	TS Riemann Eutin	12.34	25.24	0.977813
Kemp, Katharina	1990	MTV Lübeck	12.4	24.94	0.994387
Klauder, Wiebke	1978	SG TSV Kronshagen/Kieler TB	12.07	24.34	0.991783
Koberg, Svea	1992	SV Fleckeby	12.39	25.67	0.965329
Köbke, Yvonne	1973	TSV Travemünde	11.93	24.4	0.977869
Köhler, Imke	1973	SC Rönnau 74	12.34	24.35	1.01355
Kollar, Meike	1965	LG Wedel/Pinneberg	12.44	25.29	0.983788
Krambeer, Beate	1962	TSV Brunsbüttel	12.34	25.24	0.977813
Krebs, Julia	1988	SV Wahlstedt	12.14	25.34	0.958169
Krützmann, Petra	1961	SC Rönnau 74	12.14	24.54	0.989405
Lantzsch, Kirsten	1971	LG Kiel	12.34	25.24	0.977813
Lauer, Britta	1990	LG Elmshorn	12.34	25.07	0.984444
Lopez Gamarra, Sara	1991	LG Dithmarscher Westküste	12.38	25.39	0.975187
Lucht, Bettina	1982	LG Dithmarschen	12.29	25.57	0.961283
Maaß, Nane	2004	MTV Lübeck	12.44	25.09	0.99163
Maschmann, Petra	1971	MTV Lübeck	12.13	24.34	0.996713
Meyer, Alexandra	1968	SV Friedrichsgabe	12.34	25.64	0.962559
Möller, Silke	1970	Ahrensburger TSV	12.24	25.74	0.951049
Mulack, Birgit	1958	LG Itzehoe	12.14	24.84	0.977456
Müller, Leonie	1996	MTV Lübeck	11.9	24.61	0.967087
Mülling, Marika	1987	LBV Phönix Lübeck	12.32	24.75	0.995556
Neumann, Ulrike	1956	LBV Phönix Lübeck	12.44	25.44	0.977987
Nießen, Anika	2002	Halstenbeker TS	12.22	25.18	0.970612
Oppong, Anita	1974	Kieler TB	12.24	24.76	0.988691
Petersen, Iris	1970	SV Adelby	12.44	25.62	0.971116
Pollakowski, Janina	1989	SG TSV Kronshagen/Kieler TB	12.41	25.54	0.971809
Pollakowski, Ulrike	1963	LG Dithmarschen-Geest	12.24	25.04	0.977636
Rattunde, Finja	2001	MTV Lübeck	12.49	25.68	0.972741
Rohlff, Annike	1999	LG Flensburg	11.94	24.24	0.985149
Scheithe, Andrea	1964	LG Wedel/Pinneberg	12.04	25.04	0.961661
Schielke, Karin	1959	TSV Neustadt	11.94	24.37	0.979893
Schmalz, Wiebke	1974	Kaltenkirchener TS	12.5	25.26	0.989707
Schmidt, Nelly	1997	Ratzeburger SV	12.37	25.2	0.981746
Schmütz, Jessica	1985	SG TSV Kronshagen/Kieler TB	12.22	24.88	0.982315
Schnepel, Simone	1979	LG Dithmarschen	12.42	25.58	0.971071
Schreiber, Marie	1993	SG TSV Kronshagen/Kieler TB	12.5	25.47	0.981547
Schroeder, Maren	1953	KSV Holstein Kiel	11.64	24.04	0.968386
Schulte, Sabine	1976	Halstenbeker TS	12.46	25.56	0.974961
Schultheiß, Marie-Luise	1938	Flensburger TB	12.34	25.24	0.977813
Schümann, Birgit	1966	SV Fehmarn	11.89	24.17	0.983864
Schwarten, Pauline	2005	Polizei-SV Eutin	12.07	24.6	0.981301
Senczek, Renate	1947	ETSV Gut Heil Neumünster	12.34	25.34	0.973954
Sindt, Tatjana	1992	TSV Schönberg	12.26	24.9	0.984739
Singer, Anja	1968	LG Neumünster	12.24	25.14	0.973747
Sörensen, Kerstin	1967	LG Wedel/Pinneberg	12.23	25.44	0.961478
Steinmeyer, Lucy	1999	LAC Lübeck	12.21	24.65	0.990669
Stöber, Katharina	1990	LG Reinbek/Ohe	12.19	24.51	0.994696
Stresing, Jacqueline-Milena	1986	TSV Altenholz	12.5	25.27	0.989315
Tschepel, Silvia	1967	Wellingdorfer TV	12.04	24.86	0.968624
Utecht, Petra	1969	TSV Schönberg	12.06	24.94	0.967121
van Zijverden, Olga	1988	Lübeck 1876	12.33	25.43	0.969721
Walter, Antje	1961	Kieler TB	12.27	25.22	0.973037
Wandt, Patricia	1964	LBV Phönix Lübeck	12.22	25.04	0.976038
Wenners, Martina	1968	Kieler TB	12.22	24.4	1.00164
Wulf, Britta	1969	LG Elmshorn	12.44	25.34	0.981847

## Sheet: 200-400
name, first name	year of birth	club	sec 200m	sec 400m	KsA
Ammann, Alina	1998	TuS Esingen	25.03	55.3	0.905244
Becker, Gabriele	1962	Ahrensburger TSV	25.04	58.04	0.862853
Bellerich, Anna-Sophie	1995	SC Rönnau 74	24.02	54.28	0.885041
Dannenberg, Margrit	1950	LBV Phönix Lübeck	25.64	57.14	0.897445
Dickow, Claudia	1963	Kieler TB	24.23	55.63	0.871113
Eichler, Britta	1963	LG GH Neum./TSV Kronshagen	25.54	56.15	0.909706
Eising, Annette	1965	Kaltenkirchener TS	25.55	56.22	0.908929
Elsler, Josefina	1991	TSV Bordesholm	24.21	57.65	0.839896
General, Bente	1981	SG TSV Kronshagen/Kieler TB	24.83	55.38	0.896714
Gülzow, Tanja	1974	Kieler TB	24.65	57.67	0.854864
Heil, Sabrina	2003	TSV St. Peter-Ording	25.3	56.45	0.896368
Heitmann, Silke	1957	Kieler TB	24.84	57.84	0.858921
Hofmeister, Carina	1993	LG Reinbek/Ohe	25.01	56.82	0.880324
Klauder, Wiebke	1978	SG TSV Kronshagen/Kieler TB	24.34	53.83	0.904328
Köhler, Imke	1973	SC Rönnau 74	24.35	52.94	0.919909
Kollar, Meike	1965	LG Wedel/Pinneberg	25.29	58.84	0.859619
Krambeer, Beate	1962	TSV Brunsbüttel	25.24	57.84	0.872752
Krayenborg, Lene	1993	SG TSV Kronshagen/Kieler TB	25.6	57.16	0.895731
Krützmann, Petra	1961	SC Rönnau 74	24.54	54.62	0.898572
Maaß, Nane	2004	MTV Lübeck	25.09	56.39	0.889874
Maschmann, Petra	1971	MTV Lübeck	24.34	54.49	0.893375
Möller, Silke	1970	Ahrensburger TSV	25.74	58.44	0.880903
Mülling, Marika	1987	LBV Phönix Lübeck	24.75	56.8	0.871479
Murmann, Silke	1961	Rendsburger TSV	25.24	58.01	0.870195
Oppong, Anita	1974	Kieler TB	24.76	54.98	0.900691
Petersen, Elke	1948	LG Stormarn-Süd	25.64	57.43	0.892913
Pfaff, Magdalena	1999	LBV Phönix Lübeck	25.14	58.79	0.855247
Pollakowski, Ulrike	1963	LG Dithmarschen-Geest	25.04	58.47	0.856508
Rohlff, Annike	1999	LG Flensburg (24,38 - 2019)	24.24	57.17	0.847997
Schmidt, Nelly	1997	Ratzeburger SV	25.2	54.76	0.92038
Schmütz, Jessica	1985	SG TSV Kronshagen/Kieler TB	24.88	57.23	0.869474
Schnepel, Simone	1979	LG Dithmarschen	25.58	57.08	0.896286
Schultz, Claudia	1973	LG Wedel/Pinneberg	25.69	55.16	0.931472
Schwichtenberg, Ruth	1953	Flensburger TB	25.54	58.24	0.87706
Sindt, Tatjana	1992	TSV Schönberg	24.9	56.61	0.879703
Singer, Anja	1968	LG Neumünster	25.14	57.2	0.879021
Skov, Sabine	1953	TSB Flensburg	25.54	56.34	0.906638
Steinmeyer, Lucy	1999	LAC Lübeck	24.65	53.96	0.91364
Teut, Regina	1955	Rendsburger TSV	25.74	54.87	0.938218
van Zijverden, Olga	1988	Lübeck 1876	25.43	57.57	0.883446
Walter, Antje	1961	Kieler TB	25.22	56.56	0.891796
Wenners, Martina	1968	Kieler TB	24.4	54.54	0.894756
Woch, Folke	1997	LG Schleswig/Fahrdorf	25.71	58.17	0.883961
Wulf, Britta	1969	LG Elmshorn	25.34	57.21	0.885859

## Sheet: 400-800
name, first name	year of birth	club	sec 400m	sec 800m	KsA
Ammann, Alina	1998	TuS Esingen	55.3	123.57	0.895039
Andresen, Heike	1962	TSV Medelby	58.3	137.2	0.849854
Ballner, Ariane	1996	LG Elmshorn	58.43	125.98	0.927608
Bellerich, Anna-Sophie	1995	SC Rönnau 74	54.28	131.71	0.824235
Bülau, Karin	1960	LBV Phönix Lübeck	57.14	127.7	0.89491
Dickow, Claudia	1963	Kieler TB	55.63	133.82	0.831415
Eising, Annette	1965	LG Wedel/Pinneberg	56.22	129.2	0.870279
Eylmann, Jaqueline	1999	SV Friedrichsgabe	57.42	135.24	0.849157
Flöttmann, Anne Inger	1977	TSV Malente	57.64	135.4	0.851403
General, Bente	1981	SG TSV Kronshagen/Kieler TB	55.38	125.95	0.879397
Gers, Agnes Thurid	1997	LG Flensburg	58.53	131.17	0.89243
Greve, Sigrid	1947	Büdelsdorfer TSV	57.83	132.92	0.870147
Gülzow, Tanja	1974	Ratzeburger SV	57.67	136.32	0.846097
Hansen, Heidrun	1958	Kieler TB	58.44	134.2	0.870939
Hartmann, Karen	1970	Kieler TB	58.02	127.09	0.913054
Heiland, Imke	1963	LG Wedel/Pinneberg	57.44	130.7	0.878959
Jaacks, Maike	1963	SC Rönnau 74	57.64	135.9	0.848271
Jamrozy, Ute	1964	Polizei-SV Eutin	58.24	131.92	0.882959
Karstens, Verena	1975	Wellingdorfer TV	58.63	127.7	0.918246
Killius, Svenja	1985	SG TSV Kronshagen/Kieler TB	58.84	130.54	0.901486
Klassen, Nathalie	1983	SG TSV Kronshagen/Kieler TB	58.03	131.83	0.880376
Klauder, Wiebke	1978	SG TSV Kronshagen/Kieler TB	53.83	132.11	0.814927
Klein, Vanessa	1976	LBV Phönix Lübeck	57.84	135.6	0.853097
Kloth, Marita	1947	LBV Phönix Lübeck	56.54	126.1	0.896749
Krützmann, Petra	1961	SC Rönnau 74	54.62	130.5	0.837088
Kubasch, Stella	1992	Ratzeburger SV	57.24	125.75	0.910378
Mues, Berit	1998	LAC Kronshagen	57.27	128.1	0.894145
Nielsen, Miriam	1973	SV Adelby	58.54	135.4	0.864697
Peucker, Antje	1967	LG Wedel/Pinneberg	58.46	128.86	0.907341
Schultz, Claudia	1973	LG Wedel/Pinneberg	55.16	123.62	0.892412
Stange, Karen	1979	Preetzer TSV	59.02	137.54	0.858223
Teegen, Isabell	1993	SC Rönnau 74	58	128.78	0.900761
Theophil, Nicole	1968	LG Wedel/Pinneberg	58.4	128.74	0.907255
Vierk, Ilka	1964	LBV Phönix Lübeck	56.71	136.2	0.832746
Walter, Antje	1961	Kieler TB	56.56	137.8	0.8209
Weiß, Martina	1961	TSB Flensburg	57.24	129.9	0.881293
Wienecke, Julia	1985	LG Reinbek/Ohe	58.08	137.32	0.845907
Winckler, Kerstin	1968	Kieler TB	58.54	128.8	0.909006
Witt, Birthe	1965	LBV Phönix Lübeck	57.54	138.2	0.832706

## Sheet: 800-1500
name, first name	year of birth	club	sec 800m	sec 1500m	KsA
Adler, Nicole	1992	SG TSV Kronshagen/Kieler TB	138.96	277.49	0.938953
Andresen, Heike	1962	TSV Medelby	137.2	291.5	0.882504
Ballner, Ariane	1996	LG Elmshorn	125.98	258.95	0.912193
Bartels, Astrid	1963	LG Wedel/Pinneberg	131.33	261.1	0.943101
Brocks, Heinke	1967	SV Friedrichsgabe	134.41	287.2	0.877503
Budde, Adia	2005	TSV Altenholz	132.66	270.63	0.919105
Burmester-Schöler, Beate	1962	LBV Phönix Lübeck	136.24	274.2	0.931619
Czinczoll, Angela	1961	VfL Oldesloe	134.8	291.9	0.865879
Dethloff, Stefanie	1966	MTV Lübeck	137.74	281.8	0.916474
Dietrichs, Ute	1968	Rendsburger TSV	137.32	281.7	0.914004
Dilba, Britta	1975	THW Kiel	136.24	295.4	0.86476
Ehler, Simone	1966	LAV Husum	138.4	286.2	0.906709
Eising, Annette	1965	Kaltenkirchener TS	129.2	280.8	0.862714
Emmerich, Sabine	1971	MTV Heide	135.3	299.8	0.846189
Feuerherdt, Lisa	1990	SG TSV Kronshagen/Kieler TB	134.98	277.22	0.912948
Gehring, Anna	1996	SC Itzehoe	132.5	262.28	0.947222
General, Bente	1981	SG TSV Kronshagen/Kieler TB	125.95	267.49	0.88286
Greinert, Sabine	1973	TSB Flensburg	135.69	279.11	0.911536
Greve, Sigrid	1947	Büdelsdorfer TSV	132.92	295.6	0.843116
Hansen, Heidrun	1958	Kieler TB	134.2	279.9	0.898982
Heer, Irmtraut	1946	Ahrensburger TSV	136.7	290.2	0.883227
Hilschenz, Marina	1981	LG Wedel/Pinneberg	134.29	266.6	0.944463
Hirsch, Carmen	1956	LAV Husum	137.3	282.7	0.910638
Jakobs, Angela	1958	LBV Phönix Lübeck	134.8	276.2	0.915098
Jamrozy, Ute	1964	Polizei-SV Eutin	131.92	269.2	0.918834
Karstens, Verena	1975	Wellingdorfer TV	127.7	262.22	0.913117
Killius, Svenja	1985	SG TSV Kronshagen/Kieler TB	130.54	258.52	0.946784
Klassen, Nathalie	1983	SG TSV Kronshagen/Kieler TB	131.83	288.31	0.857345
Kölling, Jennifer	1985	LG Wedel/Pinneberg	132.6	273.64	0.908584
Krog, Gesine	1971	LBV Phönix Lübeck	134.36	275.08	0.915824
Kubasch, Stella	1992	Ratzeburger SV	125.75	261.83	0.900513
Liebler, Nina	1976	LG Wedel/Pinneberg	135.82	288.5	0.882712
Mess, Susanne	1969	LG Wedel/Pinneberg	131.68	275.1	0.897492
Metz, Svenja	1983	WSV Tangstedt	138.99	288.96	0.901877
Müller, Urte	1967	LAV Husum	138.4	288.79	0.898577
Nielsen, Miriam	1973	TSB Flensburg	135.4	287.28	0.88372
Oriwohl, Britta	1970	SV Großhansdorf	138.7	291.01	0.893655
Peucker, Antje	1967	LG Wedel/Pinneberg	128.86	279.5	0.864445
Rehberg, Maya	1994	SC Rönnau 74	130.07	257.54	0.946965
Reiser, Nicole	1970	LBV Phönix Lübeck	134.83	277.47	0.911112
Ressing, Mareike	1970	LG Wedel/Pinneberg	132.4	262.16	0.946941
Richter, Christine	1964	Bramstedter TS	132.54	276.69	0.898162
Schäfer, Marion	1965	TSV Glücksburg 09	136.6	298.88	0.856949
Schöndorf, Tanja	1974	TSB Flensburg	134.72	284.6	0.887561
Schultz, Claudia	1973	LG Wedel/Pinneberg	123.62	267.73	0.865751
Schulz, Johanna Christine	1994	SC Rönnau 74	126.08	253.47	0.932655
Sievers, Leonie	1999	Ahrensburger TSV	138.57	289.29	0.898126
Steffen, Eva	1959	Büdelsdorfer TSV	137	282.2	0.910259
Strothmann, Kristin	1964	LG Elmshorn	137.4	286.8	0.898274
Theophil, Nicole	1968	LG Wedel/Pinneberg	128.74	260.96	0.924998
von dem Berge, Claudia	1962	LG Wedel/Pinneberg	133.39	271.12	0.922493
Weiß, Martina	1961	TSB Flensburg	129.9	287.6	0.846879
Westphal, Nina	1972	TSB Flensburg	135.61	272.55	0.932925
Wienecke, Julia	1985	LG Reinbek/Ohe	137.32	293.72	0.8766
Witt, Birthe	1965	LBV Phönix Lübeck	138.2	299.8	0.864326

## Sheet: 1500-3000
name, first name	year of birth	club	sec 1500m	sec 3000m	KsA
Adler, Christin	1992	SG TSV Kronshagen/Kieler TB	278.39	594.6	0.936394
Adler, Nicole	1992	SG TSV Kronshagen/Kieler TB	277.49	595.4	0.932113
Ahlfeldt, Gaby	1965	LG Tönning/St. Peter	299.1	658.4	0.908566
Albrecht, Philine	1992	SC Rönnau 74	288.01	638.37	0.902329
Andresen, Heike	1962	TSV Medelby	291.5	655.7	0.889126
Ballert, Gesa	1964	LAG Gettorf/Rieseby	295.1	637.56	0.925717
Bartels, Astrid	1963	LG Wedel/Pinneberg	261.1	576.9	0.905183
Beck, Corinna	1994	SG TSV Kronshagen/Kieler TB	288.74	654.32	0.882565
Becker, Frauke	1968	LG TEFT	297.86	645.2	0.923311
Becker, Inge	1968	LG TEFT	299.35	649.2	0.922212
Begau, Cornelia	1964	TSV Neustadt	283	614.8	0.920625
Braun, Simone	1970	TSV Klausdorf	289.37	654.9	0.883707
Brocks, Heinke	1967	SV Friedrichsgabe	287.2	639.2	0.898623
Budde, Adia	2005	TSV Altenholz	270.63	573.28	0.944146
Burmester-Schöler, Beate	1962	LBV Phönix Lübeck	274.2	584.2	0.93872
Deschka, Kim	1997	SG TSV Kronshagen/Kieler TB	289.86	654.66	0.885528
Dietrichs, Ute	1968	Rendsburger TSV	281.7	632.5	0.890751
Ehlers, Maria	1951	TSV Ratekau	288.4	609.1	0.946971
Eising, Annette	1965	Kaltenkirchener TS	280.8	642.1	0.87463
Feuerherdt, Lisa	1990	SG TSV Kronshagen/Kieler TB	277.22	627.95	0.882937
Freiburg, Nadja	1973	LG Wedel/Pinneberg	293.33	658.54	0.890849
Früchtenicht, Meike	1969	LG Wedel/Pinneberg	283.67	631.8	0.897974
Gehring, Anna	1996	SC Itzehoe	262.28	571.21	0.918331
Greinert, Sabine	1973	TSV Böklund	279.11	600.62	0.929406
Gremmel, Anke	1989	SG TSV Kronshagen/Kieler TB	289.52	627	0.923509
Greve, Sigrid	1947	Büdelsdorfer TSV	295.6	653	0.90536
Gründel, Nina	2000	SC Itzehoe	291.09	647.5	0.89912
Hansen, Heidrun	1958	Kieler TB	279.9	627.2	0.892538
Hauptstock, Nannette	1969	LBV Phönix Lübeck	291.2	654.6	0.889704
Hilschenz, Marina	1981	LG Wedel/Pinneberg	266.6	559.13	0.953624
Hirsch, Carmen	1956	LAV Husum	282.7	619.2	0.913114
Hoffmann, Bianca	1967	LG TEFT	297.24	633.94	0.937754
Jakobs, Angela	1958	LBV Phönix Lübeck	276.2	584.6	0.94492
Jamrozy, Ute	1964	Polizei-SV Eutin	269.2	552.12	0.97515
Karstens, Verena	1975	Wellingdorfer TV	262.22	577.7	0.907807
Karthaus, Jasmin	1996	SG TSV Kronshagen/Kieler TB	299.18	658.5	0.908671
Kayßer, Paulina	2000	SC Itzehoe	274.21	584.33	0.938545
Killius, Svenja	1985	SG TSV Kronshagen/Kieler TB	258.52	592.55	0.872568
Klaus, Kristin	1985	LG Wedel/Pinneberg	289.16	624.6	0.925905
Knudsen, Dagmar	1956	LAV Husum	288.2	596.4	0.966465
Kroeseler, Sabine	1958	LBV Phönix Lübeck	299.7	635.97	0.942497
Krog, Gesine	1971	LBV Phönix Lübeck	275.08	617.87	0.890414
Liebler, Nina	1976	LG Wedel/Pinneberg	288.5	659.17	0.875343
Martens, Daniela	1977	LG MTV/Gut Heil Itzehoe	288.78	628.04	0.919623
Mathias, Diana	1973	LG Wedel/Pinneberg	289.1	636.6	0.908263
Mess, Susanne	1969	Kieler TB	275.1	598.5	0.919298
Metz, Svenja	1983	WSV Tangstedt	288.96	643.96	0.897447
Müller, Urte	1967	LAV Husum	288.79	627.1	0.921033
Nelle, Margit	1968	LG Wedel/Pinneberg	279.5	607.7	0.919862
Petersen, Anja	1971	TSV Drelsdorf	286.88	631.98	0.907877
Piel, Katja	1971	TSV Kappeln	296.25	654.23	0.905645
Rehberg, Maya	1994	SG TSV Kronshagen/Kieler TB	257.54	555.39	0.92742
Reiser, Nicole	1970	LBV Phönix Lübeck	277.47	617.3	0.898979
Ressing, Mareike	1970	LG Wedel/Pinneberg	262.16	550.32	0.952755
Richter, Christine	1964	Bramstedter TS	276.69	609.4	0.908074
Richter, Rhea	1986	LG MTV/Gut Heil Itzehoe	286.54	600.54	0.954274
Riedemann, Julia-Marie	1991	LBV Phönix Lübeck	287.28	606.59	0.947197
Rübhausen, Claudia	1966	SV Rugenbergen	287.5	612.67	0.938515
Schäfer, Marion	1965	TSB Flensburg	298.88	652.5	0.916107
Schlotfeldt, Mareile	1998	TSV Schwarzenbek	298.9	648.85	0.921322
Schmitt, Sabine	1957	LG Wedel/Pinneberg	285	629.4	0.905624
Schöndorf, Tanja	1974	TSB Flensburg	284.6	616.2	0.923726
Schubert, Ariane	1958	TuS Gaarden	298.4	655.5	0.91045
Schulz, Johanna Christine	1994	SC Rönnau 74	253.47	596.38	0.850029
Sietz, Karin	1966	LG Wedel/Pinneberg	285.27	580.92	0.982132
Sievers, Leonie	1999	Ahrensburger TSV	289.29	643.42	0.899226
Simon, Hilke	1967	TSV Quellenhaupt Bornhöved	299.5	641.15	0.934259
Skambath, Isabelle	1997	Möllner SV	297.26	658.57	0.902744
Stadel, Inge	1966	LAV Husum	285.4	614.12	0.92946
Strothmann, Kristin	1964	LG Elmshorn	286.8	603.2	0.950928
Theophil, Nicole	1968	LG Wedel/Pinneberg	260.96	585.92	0.89077
Thiesen, Andrea	1966	LAV Husum	287.3	644.2	0.891959
Tiedemann, Anke	1975	SG TSV Kronshagen/Kieler TB	268.95	572.73	0.939186
Ulrich, Uta	1966	LBV Phönix Lübeck	278.09	607.81	0.915056
von Campenhausen, Ingeborg	1964	LAG Gettorf/Rieseby	295.25	652.7	0.904704
von dem Berge, Claudia	1962	LG Wedel/Pinneberg	271.12	593.32	0.913908
von der Fecht, Solveig	1975	Halstenbeker TS	290.01	621.41	0.933393
Wellbrock, Nele	2000	SG TSV Kronshagen/Kieler TB	299.62	636	0.942201
Westphal, Nina	1972	LBV Phönix Lübeck	272.55	591.32	0.921836
Willenborg, Nadja	1992	SC Rönnau 74	287.9	613.8	0.938091
Wirdemann, Meike	1963	LG Wedel/Pinneberg	295.9	602.89	0.981605

## Sheet: 3000-5000
name, first name	year of birth	club	sec 3000m	sec 5000m	KsA
Adler, Christin	1992	SG TSV Kronshagen/Kieler TB	594.6	1041.28	0.951713
Adler, Nicole	1992	SG TSV Kronshagen/Kieler TB	595.4	1027.11	0.966141
Beck, Corinna	1994	SG TSV Kronshagen/Kieler TB	654.32	1121.96	0.971989
Becker, Frauke	1968	LG TEFT	645.2	1119.9	0.960205
Becker, Inge	1968	LG TEFT	649.2	1120.4	0.965727
Becker, Verena	1977	SG TSV Kronshagen/Kieler TB	635.4	1099.57	0.963104
Begau, Cornelia	1964	TSV Neustadt	614.8	1093.3	0.937224
Behrend, Birgit	1969	Kieler TB	608.4	1065.54	0.95163
Braun, Simone	1970	TSV Klausdorf 30.09.17 Flensburg	654.9	1131.7	0.964478
Budde, Adia	2005	TSV Altenholz	573.28	1041.2	0.917659
Burmester-Schöler, Beate	1962	LBV Phönix Lübeck	584.2	1006.5	0.967379
Carstensen, Anita	1960	LG RW Niebüll/TSV Süderlügum	628.3	1073.7	0.975288
Ehlers, Maria	1951	TSV Ratekau	609.1	1054.34	0.962846
Eising, Annette	1965	Kaltenkirchener TS	642.1	1174.2	0.911401
Gehring, Anna	1996	SC Itzehoe	571.21	952.88	0.999094
Greinert, Sabine	1973	TSV Böklund	600.62	1087.24	0.920711
Hartmann, Karen	1970	Kieler TB	577.55	1030.3	0.934275
Hauke, Charlotte	1939	LG Kiel	636.4	1089.63	0.973419
Herzberg, Kerstin	1966	LBV Phönix Lübeck	568.2	959	0.987487
Hilschenz, Marina	1981	LG Wedel/Pinneberg	559.13	990.9	0.940441
Hintz, Ursel	1967	LAV Husum	653.6	1133.4	0.96112
Hirsch, Carmen	1956	LAV Husum	619.2	1113.5	0.926807
Hormann, Stefanie	1967	LBV Phönix Lübeck	593.3	1030.2	0.959846
Humfeldt, Barbara	1969	LG MTV/Gut Heil Itzehoe	633.6	1099.1	0.960786
Jakobs, Angela	1958	LBV Phönix Lübeck	584.6	1139.3	0.855203
Jamrozy, Ute	1964	Polizei-SV Eutin	552.12	950.64	0.967979
Johannsen, Verena	1968	LG Wedel/Pinneberg	637.29	1107.2	0.959312
Karstens, Verena	1975	Wellingdorfer TV	577.7	1029.89	0.934889
Karthaus, Jasmin	1996	SG TSV Kronshagen/Kieler TB	658.5	1162.07	0.944435
Kayßer, Paulina	2000	SC Itzehoe	584.33	985.72	0.987992
Knudsen, Dagmar	1956	LAV Husum	596.4	1008.7	0.985427
Konjack, Ingeborg	1944	LG Elmshorn	651.6	1131.9	0.959449
Kratzenstein, Claudia	1981	SG TSV Kronshagen/Kieler TB	616.61	1068.92	0.961422
Kroeseler, Sabine	1958	LBV Phönix Lübeck	635.97	1126.5	0.940923
Krüger, Dagmar	1946	LG GH Neum./TSV Kronshagen	652	1154.4	0.941326
Kümpers, Julia	1992	LAC Kronshagen	562.01	981.56	0.95428
Langbehn, Karin	1950	Rendsburger TSV	647.04	1142.3	0.94406
Lorenzen, Uta	1967	Kieler TB	651.06	1190.1	0.911772
Luck, Julia	1983	LG Wedel/Pinneberg	656.4	1131.54	0.966824
Mahrt, Sünje	1966	TSV Drelsdorf	641.84	1176.2	0.909483
Marquardt, Britta	1978	LBV Phönix Lübeck	655.39	1145.8	0.953322
Martens, Daniela	1977	LG MTV/Gut Heil Itzehoe	628.04	1185.2	0.88317
Mathias, Diana	1973	LG Wedel/Pinneberg	636.6	1117.29	0.949619
Müller, Urte	1967	LAV Husum	627.1	1098.5	0.951449
Petersen, Anja	1971	TSV Drelsdorf	631.98	1104.2	0.953903
Piel, Katja	1971	TSV Kappeln	654.23	1153.2	0.945528
Prieske, Anna	1991	Spiridon-Club Bad Oldesloe	644.47	1128.72	0.951624
Rehberg, Maya	1994	SG TSV Kronshagen/Kieler TB	555.39	990.49	0.934537
Richter, Christine	1964	Bramstedter TS	609.4	1063.6	0.954933
Richter, Rhea	1986	LG MTV/Gut Heil Itzehoe	600.54	1051.21	0.952141
Riedemann, Julia-Marie	1991	LBV Phönix Lübeck	606.59	1093.4	0.924623
Rübhausen, Claudia	1966	SV Rugenbergen	612.67	1174	0.869776
Salomon, Gudrun	1941	LG Kiel	624.16	1078.9	0.964192
Schröder, Melinda	1997	TSV Zarpen	644.53	1155.68	0.92951
Schubert, Ariane	1958	TuS Gaarden	655.5	1159	0.942623
Schuster(-Dörscher), Christine	1975	SG TSV Kronshagen/Kieler TB	629.34	1092.95	0.959696
Sietz, Karin	1966	LG Wedel/Pinneberg	580.92	1029.8	0.940183
Simon, Hilke	1967	LG Rönnau/Quellenhaupt	641.15	1157.9	0.922863
Stadel, Inge	1966	LAV Husum	614.12	1094.9	0.934819
Strothmann, Kristin	1964	LG Elmshorn	603.2	1086.5	0.925295
Teegen, Isabell	1993	SC Rönnau 74	552.8	964.45	0.955294
Thiesen, Andrea	1966	LAV Husum	644.2	1123.6	0.95556
Tiedemann, Anke	1975	SG TSV Kronshagen/Kieler TB	572.73	996.69	0.95772
Timm, Svea	2001	LAC Kronshagen	605.81	1055.72	0.956393
Treuschel, Ingeburg	1961	Krummesser SV	653.7	1153.6	0.944435
Ulrich, Uta	1966	LBV Phönix Lübeck	607.81	1074.8	0.942516
von der Fecht, Solveig	1975	Halstenbeker TS	621.41	1107.1	0.935492
Weber, Ingrid	1950	TSV Glücksburg 09	649.2	1098	0.985428
Wellbrock, Nele	2000	SG TSV Kronshagen/Kieler TB	636	1027.89	1.03124
Winckler, Kerstin	1968	Kieler TB	588.84	1084.6	0.90485
Wolff, Anja-Katariina	1978	Halstenbeker TS	627.72	1114.2	0.93897
Zembold, Meike	2002	LAC Kronshagen	656.6	1157	0.945837

## Sheet: 5000-10000
name, first name	year of birth	club	sec 5000m	sec 10,000m	KsA
Adler, Christin	1992	LAC Kronshagen	1041.28	2226.97	0.935154
Adler, Nicole	1992	LAC Kronshagen	1027.11	2180.79	0.941961
Becker, Verena	1977	SG TSV Kronshagen/Kieler TB	1099.57	2348.35	0.936462
Behrend, Birgit	1969	Kieler TB	1065.54	2185.2	0.975233
Carstensen, Anita	1960	LG RW Niebüll/TSV Süderlügum	1073.7	2243.4	0.957208
Ehlers, Maria	1951	TSV Ratekau	1054.34	2213	0.95286
Friedrichsen(-Paysen), Karen	1973	TSV Langenhorn	1016.06	2106.49	0.964695
Froehlich, Fenna	1997	LAC Lübeck	1076.89	2286.9	0.94179
Gudd, Bianca	1967	LBV Phönix Lübeck	1123.8	2328.5	0.965257
Hansen, Hannegret	1956	TSV Glücksburg 09	1161	2462.5	0.942944
Hauke, Charlotte	1939	LAC Neumünster	1089.63	2270.7	0.95973
Herzberg, Kerstin	1993	LBV Phönix Lübeck	959	1988.4	0.964595
Hirsch, Carmen	1956	LAV Husum	1113.5	2319.8	0.959997
Hoppe, Ursel	1963	TuS Holtenau	1146.02	2261.2	1.01364
Hormann, Stefanie	1967	LBV Phönix Lübeck	1030.2	2152.2	0.957346
Humfeldt, Barbara	1969	LG MTV/Gut Heil Itzehoe	1099.1	2368.7	0.92802
Jachmann, Natalie	1991	TSV Glücksburg 09	1027.26	2137.33	0.961255
Jamrozy, Ute	1986	Polizei-SV Eutin	950.64	1994.83	0.953104
Knudsen, Dagmar	1956	LAV Husum	1008.7	2086.8	0.966743
Konjack, Ingeborg	1944	LG Elmshorn	1131.9	2396.2	0.944746
Kreutzberger, Karin	1944	LG Elmshorn	1193.4	2454.2	0.972537
Krüger, Dagmar	1946	LG Kiel	1154.4	2461	0.938155
Kümpers, Julia	1992	LAC Kronshagen	981.56	2035.27	0.96455
Lakies, Anke	1967	VfL Oldesloe	1060	2363.4	0.897013
Leibrandt, Claudia	1958	TSV Malente	1151.8	2340.1	0.984402
Lindig, Gunda	1960	Ahrensburger TSV	1133.3	2371.2	0.955887
Müller, Urte	1967	LAV Husum	1098.5	2427.8	0.904935
Nienhaus, Carina	1986	Running Athlete Lübeck	1162.5	2395	0.970772
Peters, Gesine	1971	LBV Phönix Lübeck	1156.53	2438.23	0.948664
Richter, Christine	1964	Bramstedter TS	1063.6	2279.4	0.933228
Salomon, Gudrun	1941	LG Kiel	1078.9	2274	0.948901
Schubert, Ariane	1958	TuS Gaarden	1159	2436.4	0.951404
Seifert, Birgit	1956	LG Elmshorn	1155.54	2389.2	0.967303
Sietz, Karin	1966	LG Wedel/Pinneberg	1029.8	2131.5	0.966268
Simon, Hilke	1967	LG Rönnau/Quellenhaupt	1157.9	2456.2	0.942839
Stadel, Inge	1966	LAV Husum	1094.9	2322.8	0.942742
Steffen, Ingeborg	1943	TSV Neustadt	1138.5	2391.2	0.952242
Sticher, Claudia	1986	LG Elmshorn	1189.79	2458.29	0.967982
Strothmann, Kristin	1964	LG Elmshorn	1086.5	2199.7	0.987862
Stumpf, Bettina	1958	Schenefelder TS	1150.8	2440.2	0.943201
Teegen, Isabell	1993	SC Rönnau 74	964.45	2062.73	0.93512
Tidow, Katja	1963	ETSV Gut Heil Neumünster	1123.9	2347.2	0.957652
Ulrich, Uta	1966	LBV Phönix Lübeck	1074.8	2263.9	0.949512
Weber, Ingrid	1950	TSV Glücksburg 09	1098	2316.9	0.947818
Wellbrock, Nele	2000	LAC Kronshagen	1027.89	2194.11	0.936954
Wentzel, Heidrun	1943	TSV Ratekau	1128.6	2416.1	0.934233
