# Supplementary material for: Sex-specific characteristics of special endurance and performance potential in female runners
Source: BMC Res Notes. 2025 Apr 26;18:196. doi: 10.1186/s13104-025-07256-6 (PMC12032771; doi:10.1186/s13104-025-07256-6)
Supplement: Supplementary file 11 — Supplementary Material 11 [file 13104_2025_7256_MOESM11_ESM.xlsx]

## Sheet: 800_1500_without3000
name, first name	date or year of birth	nation or club	sec 800m	sec 1500m	KsA 800m/1500m
OLIZARENKO Nadezhda	28 NOV 1953	URSURS	113.43	239.48	0.888096
SEMENYA Caster	07 JAN 1991	RSARSA	114.25	239.92	0.892876
MUTOLA Maria de Lurdes	27 OCT 1972	MOZMOZ	115.19	241.5	0.894332
ČEPLAK Jolanda	12 SEP 1976	SLOSLO	115.19	242.44	0.890865
Wachtel Christine	1965	SC Neubrandenburg	115.32	258.03	0.837984
SHTEREVA Nikolina	21 JAN 1955	BULBUL	115.42	242.33	0.893049
PROVIDOKHINA Tatyana	26 MAR 1953	URSURS	115.46	238.37	0.908199
LIU Dong	24 DEC 1973	CHNCHN	115.54	236.31	0.916751
GURINA Lyubov	06 AUG 1957	URSURS	115.56	242.47	0.893616
Weiß Anita	1955	SC Neubrandenburg	115.74	247.1	0.878238
MASTERKOVA Svetlana	17 JAN 1968	RUSRUS	115.87	237.11	0.916268
PODKOPAYEVA Yekaterina	11 JUN 1952	URSURS	115.96	236.65	0.918762
VESELKOVA Lyudmila	25 OCT 1950	URSURS	115.96	242.37	0.897079
JEPKOSGEI Janeth	13 DEC 1983	KENKEN	116.04	242.32	0.897883
AGLEDTINOVA Ravilya	10 FEB 1960	URSURS	116.24	238.4	0.91422
BENHASSI Hasna	01 JUN 1978	MARMAR	116.43	242.54	0.900083
DJATÉ-TAILLARD Patricia	03 JAN 1971	FRAFRA	116.53	242.26	0.901898
RIGEL Zoya	15 OCT 1952	URSURS	116.57	243.9	0.896141
PETROVA Totka	17 DEC 1956	BULBUL	116.59	240.15	0.91029
LOVIN Fita	14 JAN 1951	ROUROU	116.67	240.12	0.911029
KOSTETSKAYA Yekaterina	31 DEC 1986	RUSRUS	116.67	241.77	0.904811
ALEMU Habitam	09 JUL 1997	ETHETH	116.71	241.41	0.906471
ROGACHOVA Lyudmila	30 OCT 1966	URSURS	116.82	236.91	0.92456
CHERKASOVA Svetlana	20 MAY 1978	RUSRUS	116.93	245.55	0.892868
LI Liu	12 MAR 1971	CHNCHN	116.96	239.34	0.91627
SUM Eunice Jepkoech	10 APR 1988	KENKEN	116.99	241.54	0.908157
WELTEJI Diribe	13 MAY 2002	ETHETH	117.02	235.08	0.933352
Klapezynski Ulrike	1953	SC Cottbus	117.06	239.9	0.914912
WANG Yuan	08 APR 1976	CHNCHN	117.18	239.81	0.916194
ULLRICH-KÖRNER Hildegard	20 DEC 1959	GDRGDR	117.2	238.67	0.920727
GRACE Kate	24 OCT 1988	USAUSA	117.2	241.33	0.910579
KLINGER Margrit	22 JUN 1960	FRGFRG	117.22	242.66	0.905743
SOBOLEVA Yelena	03 OCT 1982	RUSRUS	117.28	236.43	0.930085
Lange Andrea	1966	ASK Vorwärts Potsdam	117.31	240.07	0.916217
SILAI Ileana	14 OCT 1941	ROUROU	117.39	243.5	0.903927
WADE Kirsty	06 AUG 1962	GBRGBR	117.42	240.73	0.914562
ZÚÑIGA Maite	28 DEC 1964	ESPESP	117.45	240.59	0.915328
ARAFI Rababe	12 JAN 1991	MARMAR	117.47	238.84	0.922192
ZAVYALOVA Yekaterina	01 MAR 1991	RUSRUS	117.53	240.11	0.917782
SOROKINA Tamara	15 AUG 1950	URSURS	117.55	238.89	0.922627
Schroeder Antje	1963	SC Chemie Halle	117.57	251.36	0.877004
LANG Yinglai	22 AUG 1979	CHNCHN	117.62	231.34	0.953305
MARTÍNEZ Mayte	17 MAY 1976	ESPESP	117.62	245.05	0.899969
CHIDU Tudorita	17 OCT 1967	ROUROU	117.64	245.69	0.897778
DORIO Gabriella	26 JUN 1957	ITAITA	117.66	238.65	0.924419
KIPYEGON Faith	10 JAN 1994	KENKEN	117.68	229.11	0.963075
LANGAT Nancy Jebet	22 AUG 1981	KENKEN	117.75	240.13	0.919424
LU Yi	10 APR 1974	CHNCHN	117.77	240.05	0.919886
HURTA Sage	23 JUN 1998	USAUSA	117.85	241.79	0.913887
WÜHN Katrin	1965-11-19	GDRGDR	117.86	243.77	0.906541
CONSTANTIN Mitica	1962-08-18	ROUROU	117.87	243.04	0.909341
GORELOVA Natalya	18 APR 1973	RUSRUS	117.9	239.7	0.922247
MARTINEZ Brenda	08 SEP 1987	USAUSA	117.91	240.94	0.917578
MEADOWS Jennifer	17 APR 1981	GBRGBR	117.93	259.36	0.852555
SNOWDEN Katie	09 MAR 1994	GBRGBR	118	240.04	0.921721
ZBROZHEK Oksana	12 JAN 1978	RUSRUS	118.06	240.86	0.91905
KITOVA Svetlana	25 JUN 1960	URSURS	118.08	241.02	0.918596
FAVOR HAMILTON Suzy	08 AUG 1968	USAUSA	118.1	237.4	0.932761
Gluth Doris	1955	SC Empor Rostock	118.11	247	0.896584
CHUVASHOVA Vera	07 OCT 1959	URSURS	118.12	245.73	0.901294
CHEBET Winny	20 DEC 1990	KENKEN	118.13	238.2	0.929865
TOMOVA Lilyana	1946-08-09	BULBUL	118.14	244.97	0.904243
Hübner Marion	1962	SC Chemie Halle	118.18	257.81	0.859499
LYNE Rebecca	04 JUL 1982	GBRGBR	118.2	246.85	0.897812
CHEPCHIRCHIR Nelly	04 JUN 2003	KENKEN	118.23	238.96	0.927692
GULYAYEVA Aleksandra	1994-04-30	RUSRUS	118.34	244.49	0.907552
UCENY Morgan	10 MAR 1985	USAUSA	118.37	240.06	0.924534
CICHOCKA Angelika	15 MAR 1988	POLPOL	118.41	241.61	0.918914
Falck Hildegard	1949	VfL Wolfsburg	118.45	254.6	0.872324
OKORO Marilyn	23 SEP 1984	GBRGBR	118.45	251.85	0.881849
CALDWELL Abbey	03 JUL 2001	AUSAUS	118.48	241.15	0.921211
BUKIS Anna	08 SEP 1953	POLPOL	118.51	239.67	0.927134
KLOCOVÁ Lucia	20 NOV 1983	SVKSVK	118.51	242.99	0.914467
BAIKAUSKAITĖ Laimutė	10 JUN 1956	URSURS	118.52	240.24	0.925012
MESHESHA Hirut	20 JAN 2001	ETHETH	118.54	234.87	0.946321
JING Liu	03 FEB 1971	CHNCHN	118.55	237.03	0.937777
BECLEA-SZEKELY Violeta	26 MAR 1965	ROUROU	118.57	238.29	0.932976
HOFFMEISTER Gunhild	06 JUL 1944	GDRGDR	118.61	241.4	0.921267
Teichmann Ivonne	1977	SC Magdeburg	118.62	251.15	0.885576
NANYONDO Winnie	23 AUG 1993	UGAUGA	118.63	239.56	0.928499
CUSMA Elisa	1981-07-24	ITAITA	118.63	244.98	0.907957
WYSOCKI Ruth	08 MAR 1957	USAUSA	118.65	240.18	0.926258
MODAHL-EDWARDS Diane	17 JUN 1966	GBRGBR	118.65	254.41	0.87445
CHAHYD Hind DEHIBA	17 MAR 1979	FRAFRA	118.67	239.76	0.928037
TROST Katharina	28 JUN 1995	GERGER	118.68	242.32	0.91831
WANG Qingfen	27 MAR 1973	CHNCHN	118.69	238.97	0.931262
MESELE Worknesh	11 JUN 2001	ETHETH	118.71	237	0.939161
BOULMERKA Hassiba	10 JUL 1968	ALGALG	118.72	235.3	0.946026
SIMPSON Jemma	10 FEB 1984	GBRGBR	118.74	246.39	0.903598
YEVDOKIMOVA Natalya	17 MAR 1978	RUSRUS	118.75	237.73	0.936593
KUZNETSOVA Olga	23 OCT 1967	RUSRUS	118.77	243.18	0.915757
STOYANOVA-GOSPODINOVA Vanya	12 DEC 1958	BULBUL	118.78	243.14	0.915985
WILLARD Anna	31 MAR 1984	USAUSA	118.8	239.38	0.930529
YACHMENEVA Marina	14 JUL 1961	URSURS	118.84	242.84	0.917579
JEPKOSGEI Nelly	14 JUL 1991	BRNBRN	118.96	240.99	0.925557
BELLÒ Elena	1997-01-18	ITAITA	118.97	245.09	0.91015
ENNAOUI Sofia	30 AUG 1995	POLPOL	118.98	239.7	0.930695
BAILEY Shireen	27 SEP 1959	GBRGBR	118.98	242.32	0.920632
SCOTT Susan	26 SEP 1977	GBRGBR	119.02	247	0.903492
HILTZ Nikki	23 OCT 1994	USAUSA	119.03	239.61	0.931435
BIRYUKOVA-SAMOROKOVA Irina	06 DEC 1964	RUSRUS	119.07	244.66	0.912516
RYDZ Małgorzata	1967-01-18	POLPOL	119.12	241.91	0.923277
LISHCHINSKA Irina	1976-01-15	UKRUKR	119.15	240.04	0.930704
SHARMINA Yekaterina	1986-08-06	RUSRUS	119.17	245.06	0.911792
AREGAWI Abeba	1990-07-05	SWESWE	119.2	236.6	0.944632
PANTELEYEVA Natalya	1983-09-10	RUSRUS	119.21	240.81	0.928195
GUERRERO Esther	1990-02-07	ESPESP	119.22	242.41	0.922146
Lesch Gabriela Katharina	1964	Eintracht Frankfurt	119.24	254.45	0.87866
Kolberg Majtie	1999	LG Kreis Ahrweiler	119.24	256.37	0.872079
MAGEEAN Ciara	12 MAR 1992	IRLIRL	119.27	236.63	0.945067
MITREA Aurica	19 OCT 1959	ROUROU	119.27	244.83	0.913414
BOFFEY Isabelle	13 APR 2000	GBRGBR	119.3	258.39	0.865697
GIOLITTI Florence	1966-08-31	FRAFRA	119.32	245.78	0.910265
BARBULESCU-POPESCU Liliana	1982-02-05	ROUROU	119.34	240.35	0.930986
JACKSON Emma	1988-06-07	GBRGBR	119.37	245.83	0.910461
KUIVISTO Sara	1991-08-17	FINFIN	119.41	242.35	0.923845
Hering Christina	1994	LG Stadtwerke München	119.41	248.3	0.901707
POPOVA Svetlana	1959-02-03	URSURS	119.43	240.53	0.930991
BUHĂIANU-ANTOCI Elena	1975-01-16	ROUROU	119.43	242.9	0.921907
CIONCAN Maria	1977-06-19	ROUROU	119.44	238.39	0.939427
EWERLÖF Malin	1972-06-02	SWESWE	119.44	245.49	0.912257
VARGA Judit	1976-04-16	HUNHUN	119.46	241.26	0.928407
NEUMANN-LIEBETRAU Christina	30 DEC 1953	GDRGDR	119.47	245.3	0.913193
TRACEY Adelle	27 MAY 1993	GBRGBR	119.5	242.55	0.923779
TRABALDO Fabia	05 MAR 1972	ITAITA	119.51	243.62	0.919798
BAKER Ellie	1998-06-03	GBRGBR	119.52	243.95	0.918631
PADUREAN Ana	05 MAY 1969	ROUROU	119.53	244.97	0.914882
ENGLAND Hannah	06 MAR 1987	GBRGBR	119.66	241.89	0.927539
BAKER Lorraine	09 APR 1964	GBRGBR	119.67	251.95	0.890578
MOORE Charlotte	04 FEB 1985	GBRGBR	119.75	253	0.887475
GRIFFITHS Ann	20 AUG 1965	GBRGBR	119.81	247.59	0.907322
MÅKESTADBOVIM Ingvill	1981-08-07	NORNOR	119.82	242.2	0.927591
ZOLOTOVA Yevgeniya	1983-04-28	RUSRUS	119.85	242.49	0.926713
FENN Joanne	19 OCT 1974	GBRGBR	119.86	249.54	0.900607
Schulz Ellen	1962	SC Neubrandenburg	119.9	251.32	0.894527
MCDONALD Sarah	02 AUG 1993	GBRGBR	119.91	240.46	0.935005
IVES Abigail	06 FEB 2004	GBRGBR	119.92	258.94	0.868348
LEONARD Alison	17 MAR 1990	GBRGBR	120.08	249.59	0.902079
Schacht Elisabeth	1958	ASV Köln	120.13	247.11	0.911512
Brudel Birgit	1961	ASK Vorwärts Potsdam	120.16	251.43	0.896074
Gradzki Monika	1979	TV Wattenscheid 01	120.16	253.83	0.887602
SEGRAVE Hannah	14 APR 1995	GBRGBR	120.18	252.24	0.893346
Schiller Marina	1957	SC Dynamo Berlin	120.4	250.3	0.901918
Spill Tanja	1995	LAV Bayer Uerdingen/Dorm.	120.66	255.7	0.884777
SELMAN Jenny	09 MAR 1991	GBRGBR	120.86	248.24	0.912877
daFonseca-Wollheim Kristina	1972	SV Halle	120.86	241.42	0.938665
MHLANGA Khahisa	26 DEC 1999	GBRGBR	120.87	252.84	0.896343
MCDONALD Katy-Ann	01 JUN 2000	GBRGBR	120.98	252.3	0.899078
WALLACE Erin	18 MAY 2000	GBRGBR	121.16	246.29	0.922388
TAYLOR Celia	22 JAN 1977	GBRGBR	121.16	250.41	0.907212
Weidner Simone	1969	OSC Berlin	121.19	250.26	0.907981
Bens Monika	1966	VfL Ockenhausen	121.29	259.25	0.877218
Cerveny Liane	1956	SC Chemie Halle	121.3	254.3	0.894367
GIBSON Claire	25 DEC 1982	GBRGBR	121.34	254.3	0.894662
Schierjott Sylvia	1963	SC Chemie Halle	121.4	248.82	0.914818
Schenk Sylvia	1952	Eintracht Frankfurt	121.5	254.8	0.894084
BEST Charlotte	07 MAR 1985	GBRGBR	121.5	256.57	0.887916
Wüstenhagen Carmen	1973	LG Nike SCC Berlin	121.53	246.7	0.923667
COLEBROOK Teena	18 DEC 1956	GBRGBR	121.65	247.69	0.920884
Büngener Simone	1962	Sportunion Annen	121.69	255.52	0.892958
Kloppe Steffi	1956	SC Chemie Halle	121.7	251.8	0.906225
BRATHWAITE Elizabeth	10 APR 1985	GBRGBR	121.78	251.96	0.906245
CROWE Amanda	21 OCT 1973	GBRGBR	121.83	250.68	0.911246
ROSS Joanna	18 FEB 1981	GBRGBR	121.84	257.04	0.888772
Werner Kerstin	1982	TV Wattenscheid 01	121.86	255.85	0.893053
Goldfuß Janina	1983	TV Wattenscheid 01	121.89	258.09	0.88552
SMITH Stacey	24 FEB 1990	GBRGBR	121.93	246.81	0.926295
Lehmann Gabriele	1956	SC Cottbus	122	243.1	0.940971
Brückner Brigitte	1956	LAC Quelle Fürth	122.03	258.53	0.885028
Schmidt Sarah	1996	TSV Bayer Leverkusen	122.04	257.37	0.88909
Schimmer Norma	1970	OSC Berlin	122.17	256.32	0.893683
ROBINSON Lynne	21 JUN 1969	GBRGBR	122.18	252.03	0.908969
Wagner Iris	1951	SC Turbine Erfurt	122.2	251.7	0.91031
Sablitzki Regine	1957	SC Dynamo Berlin	122.3	258.6	0.886746
Kallensee Stefanie	1969	Eintracht Frankfurt	122.34	251.88	0.910702
Beutelspacher Simone	1974	VfL Sindelfingen	122.44	255.93	0.897023
PARRY Alison	19 JUN 1966	GBRGBR	122.47	253.26	0.906702
BROWNING Charlotte	08 OCT 1987	GBRGBR	122.52	249.86	0.919415
Prochnow Katja	1968	SC Neubrandenburg	122.52	252.8	0.908722
Henkel Jeanette	1966	SC Karl-Marx-Stadt	122.75	254.87	0.903034
RILEY Catherine	04 JUN 1982	GBRGBR	122.79	254.3	0.905353
FINCH Gemma	01 AUG 1997	GBRGBR	122.81	255.24	0.902166
COLE Rowena	13 JAN 1992	GBRGBR	122.88	258.07	0.892781
KELLY Sarah	31 OCT 1992	GBRGBR	122.89	259.09	0.889339
Allmandinger Margret	1958	VfB Stuttgart 1893	123	255.2	0.903703
Riedel Claudia	1967	SC Karl-Marx-Stadt	123.06	255	0.904853
ALLISON Joan	10 JUN 1947	GBRGBR	123.1	254.81	0.905822
STEWART Mary	25 FEB 1956	GBRGBR	123.11	246	0.938338
OGDEN Rachael	23 JUL 1979	GBRGBR	123.14	251.89	0.91662
Muck, Martina	1967	USC Heidelberg	123.16	269.09	0.85817
Stuhlmacher Katrin	1967	TSC Berlin	123.24	255.06	0.905963
Onyambu, Elisabeth	1967	USC Heidelberg	123.25	275.31	0.839395
NEWCOMBE Rachel	25 FEB 1967	GBRGBR	123.28	251.24	0.920037
MITCHELL Jeina	21 JAN 1975	GBRGBR	123.36	254.14	0.910128
MACDOUGALL Lynne	18 FEB 1965	GBRGBR	123.43	245.96	0.94093
FRASER Kirsty	27 NOV 1995	GBRGBR	123.45	258.81	0.894358
CAFFEL Kelly	10 FEB 1979	GBRGBR	123.48	250.22	0.925286
Ammann Alina	1998	TuS Esingen	123.57	256.74	0.902445
Klöpfel Birgit	1961	SC Eintracht Hamm	123.58	261.73	0.885311
Schultz, Claudia	1973	LG Wedel/Pinneberg	123.62	267.73	0.865751
MURRAY Madeleine	19 OCT 1993	GBRGBR	123.66	250.17	0.92682
Hoffmann Jeannette	1979	LG Nike Berlin	123.69	259.41	0.894024
CARTER Alexandra	01 APR 1980	GBRGBR	123.78	254.44	0.91215
KING Shaikira	14 JUL 2008	GBRGBR	123.79	259.31	0.895092
TAYLOR-CAREY Sheila	12 AUG 1946	GBRGBR	123.81	244.81	0.948261
WESTLEY Abby	15 JUL 1987	GBRGBR	123.9	248.74	0.933957
ARCHER Holly	07 NOV 1993	GBRGBR	123.94	247.2	0.940079
Trauth Katrin Judith	1984	SC Magdeburg	124.04	255.69	0.909598
Marxen Kerstin	1985	TSV Gomaringen	124.04	257.09	0.904644
Friedmann Ursula	1971	LG Offenburg	124.06	250.81	0.927445
Kubasch Stella	1992	Ratzeburger SV	124.1	258.69	0.899484
Büngener Bettina	1959	SU Annen	124.2	258.47	0.900975
Lakies Anke	1967	VfL Oldesloe	124.34	259.98	0.896752
Beggerow Antje	1973	SC Empor Rostock	124.54	251.98	0.92671
Schwanz Annemarie	1993	SC Neubrandenburg	124.65	250.93	0.93141
Kallabis Jolanda	2005	FT 1844 Freiburg	124.65	254.08	0.919863
Reinert Jana	1998	LG Region Karlsruhe	124.67	258.04	0.905892
Reinert, Jana	1998	LG Region Karlsruhe	124.67	258.04	0.905892
Trottnow Ann-Kristina	1976	LG VfB/Kickers Stuttgart	124.69	258.87	0.903132
Kleinau Regine	1946	SC DHfK Leipzig	124.7	247.6	0.944315
Wölpert Anette	1975	VfL Waiblingen	124.7	257.61	0.907622
Höfler, Petra	1966	TV Konstanz	124.7	267.96	0.872565
Witzmann Manuela	1970	SC Turbine Erfurt	124.71	256.79	0.910593
Pöhlitz Waltraud	1942	SC Chemie Halle	124.8	259.4	0.902082
Tüshaus Ursula	1961	TV Wattenscheid 01	124.84	260.13	0.899839
Becker Juliane	1982	SC Berlin	124.94	260.57	0.899039
Meisl Verena	2001	LG Olympia Dortmund	124.96	253.86	0.92295
Nolte Sabine	1968	LG Göttingen	124.96	260.94	0.897908
Jarmuske Sabine	1959	TSC Berlin	125	259	0.904923

## Sheet: 800_1500_with3000
name, first name	date or year of birth	nation or club	sec 800m	sec 1500m	sec 3000m	KsA 800m/1500m
KAZANKINA Tatyana	17 DEC 1951	URSURS	114.94	232.47	502.62	0.927055
MELINTE Doina	27 DEC 1956	ROUROU	115.05	236.7	517.11	0.911359
ZAYTSEVA Zamira	16 FEB 1953	URSURS	116.21	236.14	515.74	0.922731
HOLMES Kelly	19 APR 1970	GBRGBR	116.21	237.9	541.91	0.915905
QU Yunxia	25 DEC 1972	CHNCHN	116.24	230.46	492.18	0.945717
AGLETDINOVA Ravilya	1960-02-10	URSURS	116.24	238.4	526.86	0.91422
IVAN Paula	20 JUL 1963	ROUROU	116.42	233.96	507.15	0.933012
MUIR Laura	09 MAY 1993	GBRGBR	116.73	234.5	510.53	0.933342
BORISOVA Lyudmila	30 JUL 1959	URSURS	116.78	242.13	520.78	0.904318
HASSAN Sifan	01 JAN 1993	NEDNED	116.81	231.95	498.49	0.94425
REEKIE Jemma	06 MAR 1998	GBRGBR	116.9	238.65	564.81	0.918448
BRUNS Ulrike	17 NOV 1953	GDRGDR	117.06	239.9	516.38	0.914912
CHIZHENKO Yuliya	1979-08-30	RUSRUS	117.07	235.68	524.6	0.931374
ZAKHAROVA Galina	07 SEP 1956	URSURS	117.08	237.72	513.4	0.92346
LANGE-HAHMANN Andrea	1966-06-03	GDRGDR	117.31	240.07	530.94	0.916217
HAILU Freweyni	12 FEB 2001	ETHETH	117.57	236.28	506.61	0.932977
BELL Alexandra	04 NOV 1992	GBRGBR	117.66	247.06	561.95	0.892951
JAMAL Maryam Yusuf	16 SEP 1984	BRNBRN	117.8	236.18	508.87	0.935198
ARTYOMOVA Natalya	05 JAN 1963	URSURS	118.05	239.16	511.67	0.925505
JACOBS Regina	28 AUG 1963	USAUSA	118.08	240.35	519.56	0.921157
PUICĂ Maricica	29 JUL 1950	ROUROU	118.12	237.22	507.83	0.933627
Oehme Heike	1963	SC Cottbus	118.16	242.9	553.74	0.912104
MAI Yvonne	1965-08-22	GDRGDR	118.32	242.69	532.78	0.914129
Wartenberg Christiane	1956	SC Chemie Halle	117.6	237.71	539.4	0.927601
DEHIBA CHAHYD Hind	17 MAR 1979	FRAFRA	118.67	239.76	532.21	0.928037
DEBUES-STAFFORD Gabriela	13 SEP 1995	CANCAN	118.7	236.12	518.51	0.942582
GERDES Roswitha	1961-06-28	FRGFRG	118.88	244.41	534.6	0.911992
GASSER Sandra	1962-07-27	SUISUI	118.9	241.1	534.13	0.924668
SACRAMENTO Carla	10 DEC 1971	PORPOR	118.94	237.71	510.22	0.93817
KREMLYOVA Lyubov	21 DEC 1961	URSURS	118.95	238.71	526.94	0.934319
GHICAN Viorica	09 JUN 1965	ROUROU	118.96	242.76	522.39	0.918809
YATSINSKA Vesela	1951-01-16	BULBUL	119.03	244.7	532.89	0.912061
CAHILL Christina	25 MAR 1957	GBRGBR	119.05	240.57	529.89	0.927874
Strotzer Waltraud	1952	SC Motor Jena	119.25	246.14	549.4	0.908401
KRAUS Brigitte	1956-08-12	GERGER	119.28	241.54	515.11	0.925934
NELYUBOVA Olga	1964-07-12	RUSRUS	119.29	241.42	527.9	0.926472
Kießling Ellen	1968	SC Einheit Dresden	119.41	244.44	526.99	0.915946
Bletsch Yvette	1965	SC Karl-Marx-Stadt	119.43	245.12	571.6	0.913558
VAN HULST Elly	1959-06-09	NEDNED	119.62	243.63	513.97	0.920607
KLOSTERHALFEN Konstanze	1997-02-18	GERGER	119.65	238.92	500.07	0.938991
JUDD Jess	1995-01-07	GBRGBR	119.77	243.73	532.73	0.921383
Pfeiffer Astrid	1964	SC Dynamo Berlin	119.93	244.42	548.64	0.92001
Liebich Beate	1958	SC Turbine Erfurt	120	239.9	540.93	0.937891
DOBRISKEY Lisa	23 DEC 1983	GBRGBR	120.14	239.5	534.12	0.940553
Harrer Corinna	1991	LG TF Regensburg	120.34	244.3	535.47	0.923608
NICHOLSON-HARTIGAN Beverley	10 JUN 1967	GBRGBR	120.39	247.98	552.64	0.91028
PARRY-TULLETT Hayley	17 FEB 1973	GBRGBR	120.49	239.95	525.39	0.941524
Krott Martina-Agnes	1958	LAV Bayer Uerdingen/Dorm.	120.54	247	568.32	0.91503
MURRAY Yvonne	04 OCT 1964	GBRGBR	120.78	241.2	509.02	0.938899
Zauber Angelika	1958	SC Dynamo Berlin	120.92	239.9	529.61	0.945081
WALCOTT-NOLAN Revee	06 MAR 1995	GBRGBR	121.02	246.23	553.36	0.921547
Friedrich Kathleen	1977	SC Potsdam	121.45	244.27	557.48	0.932242
Klein Hanna	1993	SG Schorndorf	121.6	242.58	525	0.939896
Schmidt Birgit-Maria	1963	LC Paderborn	121.63	248.19	532.39	0.918878
BENNING Christine	30 MAR 1955	GBRGBR	121.77	241.53	524.46	0.945302
Friedmann Birgit	1960	Eintracht Frankfurt	121.8	245.9	523.65	0.928731
WEIGHTMAN Laura	01 JUL 1991	GBRGBR	121.87	240.09	506.07	0.951752
THOMAS Charlene	06 MAY 1982	GBRGBR	121.87	243.74	551.07	0.9375
FAIRCHILD Jacqueline	03 MAY 1989	GBRGBR	122.09	254.43	559.9	0.899732
Krebs Denise	1987	TV Wattenscheid 01	122.12	246.01	550.08	0.930755
Sujew Diana	1990	SC Potsdam	122.29	245.62	527.68	0.93353
Horna Annett	1987	TSV Bayer 04 Leverkusen	122.29	250.98	573.66	0.913594
TWELL Stephanie	17 AUG 1989	GBRGBR	122.58	242.54	520.98	0.947627
Bruns Anne	1974	LAV Meppen 91	122.62	249.12	574	0.922899
Kühnemund Sylvia	1974	SV Halle	122.69	245.96	573.59	0.935289
Merten Christa	1944	SV Bayer 04 Leverkusen	122.7	252.6	560.6	0.910778
MORLEY Suzanne	11 OCT 1957	GBRGBR	122.79	252.79	536.39	0.910761
GIBSON Lynn	06 JUL 1969	GBRGBR	122.83	252.32	564.6	0.912755
Michallek Vera	1958	SC Eintracht Hamm	122.9	244.29	527.62	0.943295
Bartels Astrid	1963	LG Nord-West Hamburg	122.96	257.61	562.29	0.894957
Sujew Elina	1990	SC Potsdam	123.01	247.36	537.56	0.932421
Gutwein, Beate	1960	LC/USC Heidelberg	123.05	264.22	590.5	0.873207
SLY Wendy	05 NOV 1959	GBRGBR	123.06	244.14	517.06	0.945103
HENAGHAN Dianne	06 AUG 1965	GBRGBR	123.1	256.19	554.24	0.900943
Heim Thea	1992	LG TF Regensburg	123.12	252.94	560.41	0.912667
PARKINSON-OVENS Hayley	05 DEC 1975	GBRGBR	123.19	250.34	554.88	0.92267
Kock Maren	1990	LG TF Regensburg	123.24	247.56	530.12	0.93341
BELL Georgia	17 OCT 1993	GBRGBR	123.38	252.16	546.63	0.917423
Granz Caterina	1994	LG Nord Berlin	123.46	245.6	553.02	0.942539
CLITHEROE Helen	02 JAN 1974	GBRGBR	123.53	241.1	531.82	0.960675
Burkard Elena	1992	LG farbtex Nordschwarzwald	123.6	246.51	520.46	0.940124
