# Supplementary material for: Sex-specific characteristics of special endurance and performance potential in female runners
Source: BMC Res Notes. 2025 Apr 26;18:196. doi: 10.1186/s13104-025-07256-6 (PMC12032771; doi:10.1186/s13104-025-07256-6)
Supplement: Supplementary file 12 — Supplementary Material 12 [file 13104_2025_7256_MOESM12_ESM.xlsx]

## Sheet: 100-200
name, first name	year of birth	club	sec 100m	sec 200m	KsA
Abt Gudrun Maria	1962	TSV Genkingen	11.54	23.37	0.987591
Arendt Helga	1964	Eintracht Hamm	11.54	23.13	0.997838
Auerswald Ingrid	1957	SC Motor Jena	11.04	22.6	0.976991
Balzer Karin	1938	SC Leipzig	11.54	23.64	0.976311
Beck Ute	1965	SC Karl-Marx-Stadt	11.46	23.74	0.965459
Becker Gabriele	1975	LAZ Bruchköbel	11.34	23.63	0.959797
Behrendt Kerstin	1967	SC DHfK Leipzig	11.05	22.36	0.988372
Benzinger Tina	2001	LG Stadtwerke München	11.59	23.63	0.980956
Bethge Andrea	1969	LT 85 Hannover	11.58	23.79	0.973518
Betz Bianca	1960	LG Bayer Leverkusen	11.52	23.39	0.985036
Beuster Carola	1963	SC Neubrandenburg	11.56	23.46	0.985507
Biesenbach Kira	1992	TSV Bayer 04 Leverkusen	11.66	23.45	0.994456
Blos Martina	1957	TSC Berlin	11.19	23.28	0.96134
Bodendorf Carla	1953	SC Magdeburg	11.22	22.64	0.991166
Böhme Anja	1971	LG Bayer Leverkusen	11.59	23.38	0.991446
Böhmer Marion	1958	SC Turbine Erfurt	11.44	22.88	1
Börner Katja	1986	SV Halle	11.65	23.74	0.981466
Bornscheuer Andrea	1974	TSG Gießen-Wieseck	11.57	23.37	0.990158
Braag Bettina	1965	LG Gevelsberg/Schwelm	11.54	23.7	0.97384
Braun Manuela	1966	SC Magdeburg	11.49	23.4	0.982051
Braun Sabine	1965	TV Wattenscheid 01	11.58	23.6	0.981356
Brehmer Christina	1958	SC Dynamo Berlin	11.18	22.61	0.988943
Breuer Grit	1972	SC Neubrandenburg	11.13	22.45	0.991537
Burghardt Alexandra	1994	LG Gendorf Wacker Burghausen	11.01	23	0.957391
Bußmann Gabriele	1959	ASV Köln	11.64	23.15	1.00562
Cibis Anne	1985	MTG 1899 Mannheim	11.17	23.15	0.965011
Cordes Ina	1968	LAV Bayer Uerdingen/Dorm.	11.64	23.31	0.998713
Cremer Esther	1988	TV Wattenscheid 01	11.44	23.1	0.990476
Dalchow Monika	1958	SC Traktor Schwerin	11.5	23.34	0.985433
Derr Manuela	1971	SC Neubrandenburg	11.35	23.3	0.974249
Dietz Diana	1969	SC Magdeburg	11.18	23.18	0.964625
Dinkeldein Sandra	1993	SV Werder Bremen	11.58	23.63	0.98011
Dix Maike	1986	TV Wattenscheid 01	11.52	23.26	0.990542
Drechsler Heike	1964	SC Motor Jena	10.91	21.71	1.00507
Düring Jeanette	1965	SC Cottbus	11.33	23.16	0.978411
Eberding Karla	1959	SC Magdeburg	11.38	22.88	0.994755
Eichmann Silke	1976	TV Wattenscheid 01	11.61	23.78	0.976451
Eidner Tiffany	1997	TC Bad Lobenstein	11.43	23.64	0.967005
Elsler Josefina	1991	LC Paderborn	11.33	23.16	0.978411
Feeder Christa	1952	VfL Wolfsburg	11.54	23.67	0.975074
Fehm Katrin	1998	SG Siemens Amberg	11.43	23.15	0.987473
Feller Anke	1971	TSV Bayer 04 Leverkusen	11.63	23.29	0.998712
Fiebig Tamaris	1970	SC Chemie Halle	11.51	23.19	0.992669
Fink Korinna	1981	SC Magdeburg	11.65	23.7	0.983122
Frank Martina	1965	LG Andernach/Neuwied	11.62	23.69	0.981005
Franzen Judith	1999	TSV Bayer o4 Leverkusen	11.56	23.37	0.989303
Freese Anna-Lena	1994	FTSV Jahn Brinkum	11.43	23.08	0.990468
Frewer Christina	1986	TV Wattenscheid 01	11.57	23.68	0.977196
Gang Maren	1953	VfB Stuttgart 1893	11.5	23.18	0.992235
Gangnus Jala	1986	LG Nordheide	11.61	23.24	0.999139
Gaugel Heidi-Elke	1959	VfL Sindelfingen	11.15	22.56	0.988475
Gebhart Claudia	1970	SG Ulm	11.64	23.52	0.989796
Ghosh Shanta	1975	LC Rehlingen	11.46	22.8	1.00526
Gladisch Silke	1964	SC Empor Rostock	10.86	21.74	0.99908
Göhmann Iris	1962	TK zu Hannover	11.61	23.7	0.979747
Göhr Marlies	1958	SC Motor Jena	10.81	21.74	0.99448
Gonska Nadine	1990	MTG 1899 Mannheim	11.43	22.79	1.00307
Goydke Sigrid	1952	VfV Hildesheim	11.64	23.71	0.981864
Grauvogel Louisa	1996	LG Saar 70	11.43	23.1	0.98961
Grompe Katharina	1993	LG Olympia Dortmund	11.43	23.53	0.971526
Günther Leena	1991	LT DSHS Köln	11.33	23.64	0.958545
Haack Christina Anne	1987	TV Gladbeck 1912	11.41	23.36	0.976884
Haase Rebekka	1993	LV 90 Erzgebirge	11.06	22.76	0.97188
Habel Katchi	1982	LG Olympia Dortmund	11.39	23.31	0.977263
Hafner Sabrina	2003	LG TELIS FINANZ Regensburg	11.65	23.71	0.982708
Hagen Andrea	1968	VfL Wolfsburg	11.56	23.59	0.980076
Haggenmüller Angelika	1969	MTV 1879 München	11.49	23.29	0.98669
Hamann Monika	1954	SC Neubrandenburg	11.03	22.76	0.969244
Handt Angelika	1954	SC Einheit Dresden	11.54	23.45	0.984222
Haugrund Sabine	1960	SC Neubrandenburg	11.54	23.49	0.982546
Heine Jutta	1940	SV Hannover 96	11.64	23.54	0.988955
Helten Ingeborg	1950	OSC Thier Dortmund	11.04	22.68	0.973545
Hirsch Monika	1959	USC Mainz	11.41	23.01	0.991743
Hormann Christina	1972	LG Wipperfürth	11.66	23.63	0.986881
Jacob Stefanie	1965	SC Motor Jena	11.39	23.75	0.959158
Janke Karin	1963	VfL Wolfsburg	11.61	23.11	1.00476
Jaworski Nele	2004	VfL Wolfsburg	11.63	23.72	0.980607
Junk Sophia	1999	LG Rhein-Wied	11.3	22.87	0.988194
Kaden Lilly	2001	LG Olympia Dortmund	11.28	23.21	0.971995
Kandarr Petra	1950	SC Chemie Halle	11.24	22.64	0.992933
Kasten Sandra	1973	LG Braunschweig	11.61	23.66	0.981403
Kaufer Evelin	1953	SC Einheit Dresden	11.44	23.64	0.967851
Kedzierski Johanna	1984	USC Heidelberg	11.59	23.47	0.987644
Kersten Annette	1967	SC Magdeburg	11.27	23.21	0.971133
Klösters Sabine	1960	OSC Thier Dortmund	11.44	23.56	0.971138
Knoll Silke-Beate	1967	LG Olympia Dortmund	11.17	22.29	1.00224
Koch Marita	1957	SC Empor Rostock	10.83	21.71	0.997697
Köhler Karoline	1984	TV Wattenscheid 01	11.43	23.72	0.963744
Köninger Anke	1961	VfL Sindelfingen	11.52	23.55	0.978344
Koppetsch Petra	1958	TSC Berlin	11.44	23.09	0.990905
Körner Marlene	2003	SV Halle	11.58	23.48	0.986371
Krabbe Katrin	1969	SC Neubrandenburg	10.89	21.95	0.992255
Kramer Pernilla	1996	VfL Wolfsburg	11.57	23.52	0.983844
Krause Christiane	1950	ASC Darmstadt	11.45	23.17	0.988347
Kroniger Annegret	1952	USC Mainz	11.33	22.89	0.989952
Kröning Margit	1959	SC Traktor Schwerin	11.6	23.44	0.989761
Kwayie Lisa	1996	Neuköllner SF	11.19	22.77	0.982872
Lederer Amelie-Sophie	1994	LAC Quelle Fürth	11.28	23.43	0.962868
Lepping Claudia	1968	LG Marl-Bertlich	11.56	23.18	0.997412
Lichtenhagen Silke	1973	LG Bayer Leverkusen	11.24	22.73	0.989001
Lindenberg Janin	1987	SC Magdeburg	11.63	23.47	0.991052
Löwe Gabriele	1958	SC Einheit Dresden	11.54	23.1	0.999134
Lückenkemper Gina	1996	LG Olympia Dortmund	10.95	22.67	0.966034
Maletzki Doris	1952	SC Dynamo Berlin	11.34	22.54	1.00621
Marahrens Nicole	1977	TV 87 Stadtoldendorf	11.63	23.21	1.00215
März Theresia	1960	MTV 1881 Ingolstadt	11.48	23.55	0.974947
Matheis Lara	1992	TSG Gießen-Wieseck	11.29	23.13	0.976221
Mickler Ingrid	1942	USC Mainz	11.35	23.54	0.964316
Möller Esther	1977	TV Wattenscheid 01	11.25	22.81	0.986409
Möller Sandra	1980	TV Wattenscheid 01	11.43	23.24	0.983649
Montag Jennifer	1998	TSV Bayer 04 Leverkusen	11.19	23.5	0.95234
Morgenstern Heike	1962	ASK Vorwärts Potsdam	11.3	22.65	0.997792
Morgenstern Ina	1968	SC Dynamo Berlin	11.55	23.66	0.976331
Müller Romy	1958	SC Dynamo Berlin	11.02	22.47	0.980863
Neumann Doris	1955	SC Traktor Schwerin	11.52	23.44	0.982935
Niemtschke Gudrun	1961	SC Einheit Dresden	11.61	23.57	0.985151
Nippgen Lisa	1997	MTG Mannheim	11.2	23.44	0.955631
Nwachukwu Sorina	1987	TSV Bayer 04 Leverkusen	11.62	23.69	0.981005
Okuku Holly	2005	GSV Eintracht Baunatal	11.59	23.62	0.981372
Paetz Sabine	1957	SC DHfK Leipzig	11.46	23.37	0.980745
Paschke Melanie	1970	LG Braunschweig	11.04	22.45	0.983519
Peters Mareike	1986	TSV Bayer 04 Leverkusen	11.54	23.52	0.981293
Philipp Andrea	1971	LG Olympia Dortmund	11.05	22.25	0.993258
Pinto Tatjana	1992	LC Paderborn	11	22.63	0.972161
Poßekel Elvira	1953	LG Bonn/Troisdorf	11.42	23.36	0.97774
Prepens Talea	2001	TV Cloppenburg	11.41	23.15	0.985745
Rabe Birgit	1960	SC Motor Jena	11.34	23.45	0.967164
Richter Annegret	1950	OSC Thier Dortmund	11.01	22.39	0.983475
Richter Sabine	1966	Eintracht Frankfurt	11.39	23.68	0.961993
Rieger Sabine	1963	SC Motor Jena	11.19	22.37	1.00045
Rockmeier Birgit	1973	LG Olympia Dortmund	11.33	22.9	0.98952
Rockmeier Gabriele	1973	LG Olympia Dortmund	11.17	22.68	0.985009
Rohde Brigitte	1954	SC Neubrandenburg	11.64	23.45	0.992751
Rosendahl Heidemarie	1947	TuS 04 Leverkusen	11.45	22.96	0.997387
Sarvari Ulrike	1964	VfL Sindelfingen	11.16	22.88	0.975524
Schabinger Michaela	1961	MTV 1881 Ingolstadt	11.55	23.28	0.992268
Schenten Dagmar	1958	LG Frankfurt	11.61	23.19	1.00129
Scherzl Marina	1999	LG Stadtwerke München	11.61	23.44	0.990614
Schielke Sina	1981	LG Olympia Dortmund	11.16	22.78	0.979807
Schittenhelm Elfgard	1947	OSC Berlin	11.3	23.64	0.956007
Schlieben Ellen	1966	ASK Vorwärts Potsdam	11.57	23.35	0.991006
Schmidt Heike	1958	TV Voerde	11.64	22.97	1.0135
Schönenberger Jana	1971	OSC Potsdam LSH	11.59	23.22	0.998277
Schönmetzler Christina	1971	LAC Quelle Fürth/München	11.49	23.72	0.968803
Schulze Maren	1982	LG Nord Berlin	11.6	23.56	0.98472
Schuster Claudia	1967	SC Karl-Marx-Stadt	11.52	23.35	0.986724
Schwab Corinna	1999	LAC Erdgas Chemnitz	11.38	22.51	1.01111
Seidel Katja	1973	TV 1879 Hilpoltstein	11.55	23.65	0.976744
Selmigkeit Doris	1952	SC Neubrandenburg	11.24	23.44	0.959044
Sharp Petra	1954	LAC Quelle Fürth	11.52	23.54	0.97876
Siemon Kirsten	1961	SC Empor Rostock	11.23	22.5	0.998222
Sommer Ulrike	1959	LAC Quelle Fürth	11.3	23	0.982609
Stecher Renate	1950	SC Motor Jena	11.04	22.38	0.986595
Steger Claudia	1959	LG Bayer Leverkusen	11.63	22.95	1.01351
Steinhardt Brigitte	1949	SC Motor Jena	11.64	23.54	0.988955
Stropahl Ellen	1952	ASK Vorwärts Potsdam	11.24	22.73	0.989001
Struppert Bärbel	1950	SC Motor Jena	11.34	23.64	0.959391
Sussiek Christina	1960	LG Bayer Leverkusen	11.64	23.2	1.00345
Theele Heike	1964	SC Magdeburg	11.53	23.7	0.972996
Thomas Andrea-Irmgard	1963	VfL Sindelfingen	11.34	22.74	0.997361
Tschirch Cathleen	1979	TSV Bayer 04 Leverkusen	11.3	22.97	0.983892
Vollmer Elke-Maria	1961	OSC Thier Dortmund	11.46	23.45	0.977399
Wagner Marion	1978	USC Mainz	11.24	23.39	0.961094
Wakan Katja	1981	Hallesche LA-Freunde	11.37	23.78	0.956266
Walther Gesine	1962	SC Turbine Erfurt	11.13	22.24	1.0009
Walther Kerstin	1961	SC DHfK Leipzig	11.34	22.9	0.990393
Watschke Corinna	1961	VfL Wolfsburg	11.5	23.8	0.966387
Wegmann Kerstin	1953	SC Dynamo Berlin	11.64	23.64	0.984772
Weißenberg Sophie	1997	SC Neubrandenburg	11.65	23.67	0.984368
Weit Inna	1988	ART Düsseldorf	11.35	23.08	0.983536
Weyher Petra	1947	SC Turbine Erfurt	11.64	23.54	0.988955
Wilkes Birgit	1955	LG Bonn/Troisdorf	11.54	23.44	0.984642
Wöckel Bärbel	1955	SC Motor Jena	10.95	21.85	1.00229
Wöhlk Anke	1970	SC Empor Rostock	11.6	23.27	0.996992
Zanke Doris	1958	ASK Vorwärts Potsdam	11.32	23.36	0.969178
Zehrt Monika	1952	SC Dynamo Berlin	11.54	23.04	1.00174
Zipp Bettina	1972	TV 1883 Schriesheim	11.39	23.21	0.981474

## Sheet: 200-400
name, first name	year of birth	club	sec 200m	sec 400m	KsA
Abt Gudrun Maria	1962	TSV Genkingen	23.37	52.22	0.895059
Alber Sabine	1965	LG Kappelberg	23.73	53.19	0.892273
Anlauf Susanne	1960	LG Ostsaar	23.74	53.92	0.880564
Anton Gisela	1954	SC Dynamo Berlin	23.64	50.78	0.931075
Arendt Helga	1964	SC Eintracht Hamm	23.13	50.36	0.918586
Barth Elke	1956	TSV Bayer Dormagen	23.74	52.27	0.90836
Bornscheuer Andrea	1974	TSG Gießen-Wieseck	23.37	53.23	0.878076
Breu Martina	1972	Erfurter LAC	23.8	52.47	0.907185
Breuer Grit	1972	SC Neubrandenburg	22.45	49.42	0.908539
Busch Sabine	1962	SC Turbine Erfurt	22.83	49.24	0.927295
Bußmann Gabriele	1959	LG Ahlen/Hamm	23.15	49.75	0.930653
Cordes Ina	1968	LAV Bayer Uerdingen/Dorm.	23.31	53.06	0.878628
Cremer Esther	1988	TV Wattenscheid 01	23.1	51.62	0.895002
Decker Elke	1957	TuS 04 Leverkusen	23.47	51.59	0.909866
Derr Manuela	1971	SC Neubrandenburg	23.3	51.95	0.897016
Eberding Karla	1959	SC Magdeburg	22.88	52.54	0.870955
Ekpo-Umoh Florence	1977	USC Mainz	23.63	51.13	0.924311
Everts Sabine-Christiane	1961	LAV Düsseldorf	23.43	52.8	0.8875
Fahrendorff Doreen	1968	SC Neubrandenburg	23.51	52.44	0.896644
Feller Anke	1971	TSV Bayer 04 Leverkusen	23.29	51.82	0.898881
Feuerbach Cornelia	1963	SC Magdeburg	23.5	53.41	0.879985
Fink Korinna	1981	SC Magdeburg	23.7	52.31	0.906136
Franke Inka	1962	SC Traktor Schwerin	23.59	52.62	0.896617
Franzen Judith	1999	TSV Bayer o4 Leverkusen	23.37	52.27	0.894203
Fuhrmann Dagmar	1954	LG Frankfurt	23.52	51.51	0.913221
Gaugel Heidi-Elke	1959	VfL Sindelfingen	22.56	52.83	0.85406
Ghosh Shanta	1975	LG DJK Erbach/St.Ingbert	22.8	51.25	0.889756
Gonska Nadine	1990	MTG 1899 Mannheim	22.79	52	0.876538
Goydke Sigrid	1952	VfV Hildesheim	23.71	53.79	0.881577
Haggenmüller Angelika	1969	MTV 1881 Ingolstadt	23.29	53.29	0.874085
Handt Angelika	1954	SC Einheit Dresden	23.45	51.24	0.915301
Heilmann Marion	1961	SC Traktor Schwerin	23.54	52.08	0.903994
Heinrich Evelin	1959	SC Einheit Dresden	23.75	52.5	0.904762
Heinz Ulrike	1967	USC Freiburg	23.74	53.65	0.884995
Hesselbarth Annett	1966	SC Chemie Halle	23.02	51.14	0.900274
Hoffmann Claudia	1982	SC Potsdam	23.58	51.65	0.913069
Hoven Annkathrin	2001	TSV Bayer o4 Leverkusen	23.78	52.64	0.903495
Janke Karin	1963	VfL Wolfsburg	23.11	50.64	0.912717
Kampf Stephanie	1978	VfL Sindelfingen	23.67	53.3	0.88818
Kette Nancy Mojisola	1977	Team Erfurt	23.62	51.81	0.911793
Kinzel Gisela-Maria	1961	SC Eintracht Hamm	23.47	50.83	0.92347
Kirchner Sylvia	1963	SC Magdeburg	23.42	52.53	0.891681
Kisabaka Linda	1969	LG Bayer Leverkusen	23.26	51.16	0.909304
Knoll Silke-Beate	1967	LG Olympia Dortmund	22.29	50.85	0.876696
Koch Marita	1957	SC Empor Rostock	21.71	47.6	0.912185
Krafzik Carolina	1995	VfL Sindelfingen	23.47	52.05	0.901825
Krause Christiane	1950	ASC Darmstadt	23.17	53.81	0.861178
Kröning Margit	1959	SC Traktor Schwerin	23.44	52.66	0.890239
Krug Barbara	1956	SC DHfK Leipzig	23.39	51.03	0.916716
Krug Petra	1963	SC Einheit Dresden	23.64	52.03	0.908707
Lindenberg Janin	1987	SC Magdeburg	23.47	51.97	0.903213
Maletzki Doris	1952	SC Dynamo Berlin	22.54	50.34	0.895511
Marahrens Nicole	1977	LG Weserbergland	23.21	52.2	0.889272
Marquardt Christiane	1958	TSC Berlin	23.5	51.45	0.913508
Mayer Mona	2001	LG TELIS FINANZ Regensburg	23.66	52.25	0.905646
Möhlenkamp Friederike	1992	LT DSHS Köln	23.51	52.55	0.894767
Mörig Jutta	1953	SC Turbine Erfurt	23.61	51.24	0.921546
Müller Laura Marie	1995	LC Rehlingen	22.65	51.69	0.876378
Müller Petra	1965	SC Chemie Halle	22.61	49.3	0.917241
Nwachukwu Sorina	1987	TSV Bayer 04 Leverkusen	23.69	51.53	0.919464
Pollmächer Anja	1985	LAC Erdgas Chemnitz	23.37	52.9	0.883554
Popp Bettina	1957	SC DHfK Leipzig	23.6	51.62	0.914374
Rädisch Iris	1963	ASK Vorwärts Potsdam	23.44	53.63	0.874138
Rasch Silke	1959	VfL Wolfsburg	23.78	53.44	0.88997
Rauhut Evelyn	1958	Eintracht Duisburg	23.74	53.58	0.886152
Rockmeier Birgit	1973	LG Olympia Dortmund	22.9	51.45	0.890185
Rockmeier Gabriele	1973	LG Olympia Dortmund	22.68	53.75	0.843907
Rohländer Uta	1969	SV Halle	23.38	50.33	0.929068
Roßley Karin	1957	SC Cottbus	23.67	51.31	0.922627
Rübsam Dagmar	1962	SC Turbine Erfurt	22.87	49.58	0.922549
Rücker Anja	1972	TuS Jena	23.4	49.74	0.940893
Schabinger Michaela	1961	MTV 1881 Ingolstadt	23.28	52.2	0.891954
Schmidt Heike	1958	TV Voerde	22.97	52.26	0.879066
Schniggendiller Cornelia	1956	LG Gütersloh	23.43	53.94	0.868743
Schönenberger Jana	1971	OSC Potsdam	23.22	52.42	0.885921
Schulze Maren	1982	LG Nord Berlin	23.56	53.69	0.877631
Schwab Corinna	1999	LAC Erdgas Chemnitz	22.51	50.91	0.884306
Seidler Helga	1949	SC Karl-Marx-Stadt	23.44	51.64	0.907823
Sinzel Margit	1958	SC Dynamo Berlin	22.81	50.92	0.895915
Sommer Ulrike	1959	LAC Quelle Fürth	23	52.73	0.872369
Spelmeyer Ruth Sophia	1990	VfL Oldenburg	23.43	51.43	0.911141
Steffen Wiebke	1973	SC Empor Rostock	23.7	53.1	0.892655
Steger Claudia	1959	LG Bayer Leverkusen	22.95	52.48	0.874619
Steinhardt Brigitte	1949	SC Motor Jena	23.54	52.4	0.898473
Sussiek Christina	1960	LG Bayer Leverkusen	23.2	52.94	0.876464
Thimm Ute	1958	TV Wattenscheid 01	22.87	50.28	0.909706
Uebel Ronny	1963	SC Traktor Schwerin	23.43	51.93	0.902369
Uibel Birgit	1964	SC Cottbus	23.72	52.39	0.905516
Vöcking Birgit	1960	ASV Köln	23.62	52.52	0.899467
Wahl Christine	1967	USC Heidelberg	23.73	52.92	0.896825
Wallburg Ina	1959	OSC Thier Dortmund	23.79	53.95	0.881928
Walther Gesine	1962	SC Turbine Erfurt	22.24	50.03	0.889067
Walther Kerstin	1961	SC DHfK Leipzig	22.9	51.12	0.895931
Watschke Corinna	1961	VfL Wolfsburg	23.8	53.8	0.884758
Weit Inna	1988	LC Paderborn	23.08	53.81	0.857833
Wilden Rita	1947	TuS 04 Leverkusen	23.14	50.88	0.909591
Wöckel Bärbel	1955	SC Motor Jena	21.85	49.56	0.881759
Wöhlk Anke	1970	SC Empor Rostock	23.27	52.56	0.885464
Zehrt Monika	1952	SC Dynamo Berlin	23.04	51.08	0.902114

## Sheet: 400-800
name, first name	year of birth	club	sec 400m	sec 800m	KsA
Behrendt Dürten	1962	SC Neubrandenburg	53.21	120.02	0.886686
Bens Monika	1966	VfL Ockenhausen	53.74	121.29	0.886141
Beutelspacher Simone	1974	VfL Sindelfingen	53.13	122.44	0.867854
Brückner Brigitte	1956	LAC Quelle Fürth	53.91	122.03	0.883553
Brudel Birgit	1961	ASK Vorwärts Potsdam	53.44	120.16	0.889481
Bruhns Birte	1970	SC Empor Rostock	52.97	119.17	0.888982
Buse Bettina	1955	SC Dynamo Berlin	52.54	119.24	0.881248
Bußmann Gabriele	1959	LG Ahlen/Hamm	49.75	118.11	0.842435
Erdmann Yvonne	1967	SC Traktor Schwerin	53.91	123.91	0.870148
Everts Sabine-Christiane	1961	LAV Düsseldorf	52.8	126.17	0.836966
Falck Hildegard	1949	VfL Wolfsburg	53.24	118.45	0.898945
Ferenz Daniela	1990	LG Neckar-Enz	53.2	125.61	0.847066
Giggel Heidrun	1962	SC Magdeburg	52.74	121.47	0.868363
Gutewort Marlies	1953	OSC Berlin	53.33	124.86	0.854237
Hering Christina	1994	LG Stadtwerke München	52.91	119.41	0.88619
Hoffmann Claudia	1982	SC Potsdam	51.65	121.18	0.852451
Hook Ursula-Maria	1957	OSC Dortmund	53.14	119.4	0.890117
Hübner Marion	1962	SC Chemie Halle	53.72	118.18	0.909122
Huneke Heike	1966	VfL Ockenhausen	53.7	121.56	0.883514
Kisabaka Linda	1969	LG Bayer Leverkusen	51.16	118.24	0.865359
Kleinbrahm Petra	1959	LG Bayer Leverkusen	53.74	121.51	0.884536
Kloppe Steffi	1956	SC Chemie Halle	53.44	121.7	0.878225
Knippel Anja	1974	Erfurter LAC	51.86	120.11	0.863542
Koczelnik Brigitte	1953	TuS 04 Leverkusen	53.63	121.7	0.881348
Kohlmann Fabienne	1989	LG Karlstadt/Gambach/Lohr	52.3	118.34	0.883894
Kunz Julia-Kristin	1984	LG Nike Berlin	53.79	125.5	0.857211
Leistenschneider Nicole	1967	MTG 1899 Mannheim	52.67	122.1	0.862735
Lesch Gabriela Katharina	1964	TSV Kirchhain	53.13	119.24	0.891144
Liebich Beate	1958	SC Neubrandenburg	53.6	120	0.893333
Lix Ute	1965	TV 1861 Gelnhausen	52.3	120.89	0.865249
Marquardt Christiane	1958	TSC Berlin	51.45	121	0.850413
Meißner Heike	1970	LG Dresdner SC 1898	52.36	119.5	0.876318
Mosler Sonja	1993	TV Herkenrath 09	53.24	122.82	0.86696
Peters Gabriele	1959	SC DHfK Leipzig	53.66	120.6	0.889884
Politz Marita	1950	SC Chemie Halle	53.84	119.9	0.898082
Rübsam Dagmar	1962	SC Turbine Erfurt	49.58	118.36	0.837783
Sablitzki Regine	1957	SC Dynamo Berlin	53.62	122.3	0.87686
Schmidt Gertrud	1942	SC Traktor Schwerin	53.94	123.2	0.875649
Schmidt Nelly	1997	LT DSHS Köln	52.77	125.56	0.840554
Schmidt Romy	1959	SC Turbine Erfurt	52.27	119.42	0.875398
Schmidt Sarah	1996	LAZ Mönchengladbach	53.19	122.04	0.871681
Schott Maren	1976	TSV Bayer 04 Leverkusen	53.55	123.64	0.866225
Schulz Ellen	1962	SC Neubrandenburg	53.85	119.9	0.898249
Siebach Renate	1952	SC DHfK Leipzig	51.94	122.2	0.850082
Sieger Susann	1968	SC Cottbus	52.02	124.49	0.83573
Teichmann Ivonne	1977	SC Magdeburg	53.25	118.62	0.897825
Urbansky Ulrike	1977	Team Erfurt	52.35	122.96	0.851496
Vogelgesang Ines	1963	SC Dynamo Berlin	53.43	118.36	0.902839
Wachtel Christine	1965	SC Neubrandenburg	51.62	115.32	0.895248
Walter Carolin	1988	TSV Bayer 04 Leverkusen	52.85	123.11	0.858582
Weinstein Erika	1950	LG Schweinfurt	52.47	125	0.83952
Weiß Anita	1955	SC Neubrandenburg	51.62	115.74	0.891999
Wodars Sigrun	1965	SC Neubrandenburg	51.8	115.26	0.898837
Zwiener Sabine-Beate	1967	SV Neckarsulm	53.45	119.33	0.895835

## Sheet: 800-1500
name, first name	year of birth	club	sec 800m	sec 1500m	KsA
Allmandinger Margret	1958	VfB Stuttgart 1893	123	255.2	0.903703
Ammann Alina	1998	TuS Esingen	123.57	256.74	0.902445
Ballner Ariane	1996	LG Elmshorn	125.98	258.95	0.912193
Bartels Astrid	1963	LG Nord-West Hamburg	122.96	257.61	0.894957
Becker Juliane	1982	SC Berlin	124.94	260.57	0.899039
Beggerow Antje	1973	SC Empor Rostock	124.54	251.98	0.92671
Bens Monika	1966	VfL Ockenhausen	121.29	259.25	0.877218
Beutelspacher Simone	1974	VfL Sindelfingen	122.44	255.93	0.897023
Bibernell Ines	1965	SC Chemie Halle	125.4	245.64	0.957193
Biedermann Sarah	1991	LAC Erdgas Chemnitz	125.13	260.97	0.899026
Bletsch Yvette	1965	SC Karl-Marx-Stadt	119.43	245.12	0.913558
Brückner Brigitte	1956	LAC Quelle Fürth	122.03	258.53	0.885028
Brudel Birgit	1961	ASK Vorwärts Potsdam	120.16	251.43	0.896074
Bruns Anne	1974	LAV Meppen 91	122.62	249.12	0.922899
Büngener Bettina	1959	SU Annen	124.2	258.47	0.900975
Büngener Simone	1962	Sportunion Annen	121.69	255.52	0.892958
Burkard Elena	1992	LG farbtex Nordschwarzwald	123.6	246.51	0.940124
Cerveny Liane	1956	SC Chemie Halle	121.3	254.3	0.894367
Coqui Eva-Christina	1968	LG Anger-Piding	124.8	261.04	0.896414
daFonseca-Wollheim Kristina	1972	SV Halle	120.86	241.42	0.938665
Deselaers Ines	1963	LAV Düsseldorf	125.49	251.47	0.935673
Dörre Katrin	1961	SC DHfK Leipzig	125.4	258.66	0.909012
Falck Hildegard	1949	VfL Wolfsburg	118.45	254.6	0.872324
Fischer Susanne	1968	SC Dynamo Berlin	124.54	252.69	0.924107
Fleischer Andrea	1963	SC Motor Jena	124.21	252.93	0.920783
FrankeI Sylvia	1955	SC Motor Jena	125.6	256.4	0.918487
Friedmann Birgit	1960	Eintracht Frankfurt	121.8	245.9	0.928731
Friedmann Ursula	1971	LG Offenburg	124.06	250.81	0.927445
Friedrich Kathleen	1977	SC Potsdam	121.45	244.27	0.932242
Gärtner Christiane	1964	SC Einheit Dresden	126.01	260.14	0.908237
Gerdes Roswitha	1961	ASV Köln	118.88	244.41	0.911992
Gluth Doris	1955	SC Empor Rostock	118.11	247	0.896584
Goldfuß Janina	1983	TV Wattenscheid 01	121.89	258.09	0.88552
Gradzki Monika	1979	TV Wattenscheid 01	120.16	253.83	0.887602
Granz Caterina	1994	LG Nord Berlin	123.46	245.6	0.942539
Haak Ute	1966	LAC Quelle Fürth	125.5	257.81	0.912736
Harrer Corinna	1991	LG TF Regensburg	120.34	244.3	0.923608
Hartmann Karen	1970	SC Traktor Schwerin	124.47	249.45	0.935583
Heim Thea	1992	LG TF Regensburg	123.12	252.94	0.912667
Heldt Ursula	1956	TSV Salzgitter	124.07	261	0.891307
Henkel Jeanette	1966	SC Karl-Marx-Stadt	122.75	254.87	0.903034
Hering Christina	1994	LG Stadtwerke München	119.41	248.3	0.901707
Hoffmann Jeannette	1979	LG Nike Berlin	123.69	259.41	0.894024
Hoffmann Vera	1996	LC Rehlingen	124.88	251.44	0.931236
Hoffmeister Gunhild	1944	SC Cottbus	118.61	241.4	0.921267
Horak Birgit	1963	LC Paderborn	126.13	253.25	0.933835
Horna Annett	1987	TSV Bayer 04 Leverkusen	122.29	250.98	0.913594
Hübner Marion	1962	SC Chemie Halle	118.18	257.81	0.859499
Jarmuske Sabine	1959	TSC Berlin	125	259	0.904923
Kallabis Jolanda	2005	FT 1844 Freiburg	124.65	254.08	0.919863
Kallensee Stefanie	1969	Eintracht Frankfurt	122.34	251.88	0.910702
Kick Julia	1990	LG Telis Finanz Regensburg	125.25	250.9	0.936005
Kießling Ellen	1968	SC Einheit Dresden	119.41	244.44	0.915946
Klaassen Lena	1991	TSV Bayer 04 Leverkusen	125.27	258.83	0.907473
Klapezynski Ulrike	1953	SC Cottbus	117.06	239.9	0.914912
Klein-Arndt Melanie	1975	LAV Bayer Uerdingen/Dorm.	124.3	257	0.906858
Kleinau Regine	1946	SC DHfK Leipzig	124.7	247.6	0.944315
Klein Hanna	1993	SG Schorndorf	121.6	242.58	0.939896
Klöpfel Birgit	1961	SC Eintracht Hamm	123.58	261.73	0.885311
Kloppe Steffi	1956	SC Chemie Halle	121.7	251.8	0.906225
Klosterhalfen Konstanze	1997	TSV Bayer 04 Leverkusen	119.65	238.92	0.938991
Kock Maren	1990	LG TF Regensburg	123.24	247.56	0.93341
Kolberg Majtie	1999	LG Kreis Ahrweiler	119.24	256.37	0.872079
Krebs Denise	1987	TV Wattenscheid 01	122.12	246.01	0.930755
Krott Martina-Agnes	1958	LAV Bayer Uerdingen/Dorm.	120.54	247	0.91503
Kubasch Stella	1992	Ratzeburger SV	124.1	258.69	0.899484
Kühnemund Sylvia	1974	SV Halle	122.69	245.96	0.935289
Lakies Anke	1967	VfL Oldesloe	124.34	259.98	0.896752
Lange Andrea	1966	ASK Vorwärts Potsdam	117.31	240.07	0.916217
Lehmann Gabriele	1956	SC Cottbus	122	243.1	0.940971
Lehnich Rosemarie	1957	LAV Gütersloh	125.7	257.4	0.915647
Leist Sabine	1966	SC Traktor Schwerin	123.74	250.39	0.926604
Lesch Gabriela Katharina	1964	Eintracht Frankfurt	119.24	254.45	0.87866
Liebich Beate	1958	SC Turbine Erfurt	120	239.9	0.937891
Mai Yvonne	1965	SC Neubrandenburg	118.32	242.69	0.914129
Marxen Kerstin	1985	TSV Gomaringen	124.04	257.09	0.904644
Meisl Verena	2001	LG Olympia Dortmund	124.96	253.86	0.92295
Merten Christa	1944	SV Bayer 04 Leverkusen	122.7	252.6	0.910778
Michallek Vera	1958	SC Eintracht Hamm	122.9	244.29	0.943295
Möldner Antje	1984	SC Potsdam	124.34	248.81	0.93701
Nöllgen Verena	1960	SC DHfK Leipzig	125.2	258.6	0.907773
Nolte Sabine	1968	LG Göttingen	124.96	260.94	0.897908
Oehme Heike	1963	SC Cottbus	118.16	242.9	0.912104
Oppat Manuela	1963	SC Dynamo Berlin	124.11	253.33	0.918589
Pfeiffer Astrid	1964	SC Dynamo Berlin	119.93	244.42	0.92001
Pöhlitz Waltraud	1942	SC Chemie Halle	124.8	259.4	0.902082
Prochnow Katja	1968	SC Neubrandenburg	122.52	252.8	0.908722
Reinert Jana	1998	LG Region Karlsruhe	124.67	258.04	0.905892
Riedel Claudia	1967	SC Karl-Marx-Stadt	123.06	255	0.904853
Rößler Christine	1950	SC DHfK Leipzig	125.5	258.2	0.911357
Sablitzki Regine	1957	SC Dynamo Berlin	122.3	258.6	0.886746
Sauer Ursula	1960	SC Turbine Erfurt	125.7	252.6	0.933046
Schacht Elisabeth	1958	ASV Köln	120.13	247.11	0.911512
Schenk Sylvia	1952	Eintracht Frankfurt	121.5	254.8	0.894084
Schierjott Sylvia	1963	SC Chemie Halle	121.4	248.82	0.914818
Schiller Marina	1957	SC Dynamo Berlin	120.4	250.3	0.901918
Schimmer Norma	1970	OSC Berlin	122.17	256.32	0.893683
Schmidt Birgit-Maria	1963	LC Paderborn	121.63	248.19	0.918878
Schmidt Sarah	1996	TSV Bayer Leverkusen	122.04	257.37	0.88909
Schroeder Antje	1963	SC Chemie Halle	117.57	251.36	0.877004
Schulz Ellen	1962	SC Neubrandenburg	119.9	251.32	0.894527
Schulz Johanna	1994	SC Rönnau 74	126.08	253.47	0.932655
Schwanz Annemarie	1993	SC Neubrandenburg	124.65	250.93	0.93141
Spill Tanja	1995	LAV Bayer Uerdingen/Dorm.	120.66	255.7	0.884777
Strotzer Waltraud	1952	SC Motor Jena	119.25	246.14	0.908401
Stuhlmacher Katrin	1967	TSC Berlin	123.24	255.06	0.905963
Sujew Diana	1990	SC Potsdam	122.29	245.62	0.93353
Sujew Elina	1990	SC Potsdam	123.01	247.36	0.932421
Sussmann Jana	1990	LG Nordheide	125.91	255.91	0.922517
Teichmann Ivonne	1977	SC Magdeburg	118.62	251.15	0.885576
Themann Tabea	1992	SV Molbergen	125.47	254.55	0.924204
Theuss Bianca	1960	MSV Duisburg	125	256.21	0.914777
Trauth Katrin Judith	1984	SC Magdeburg	124.04	255.69	0.909598
Trost Katharina	1995	LG Stadtwerke München	118.68	243.53	0.913748
Trottnow Ann-Kristina	1976	LG VfB/Kickers Stuttgart	124.69	258.87	0.903132
Tüshaus Ursula	1961	TV Wattenscheid 01	124.84	260.13	0.899839
Wachtel Christine	1965	SC Neubrandenburg	115.32	258.03	0.837984
Wagner Iris	1951	SC Turbine Erfurt	122.2	251.7	0.91031
Weidner Simone	1969	OSC Berlin	121.19	250.26	0.907981
Weis Jeannette	1969	SC Turbine Erfurt	126.13	254.93	0.927681
Weiß Anita	1955	SC Neubrandenburg	115.74	247.1	0.878238
Weiss Sabine	1957	ASV Köln	125	256.27	0.914563
Werner Kerstin	1982	TV Wattenscheid 01	121.86	255.85	0.893053
Wiesenberg Cathrin	1965	Tiefbau Cottbus	125.98	259.02	0.911947
Witzmann Manuela	1970	SC Turbine Erfurt	124.71	256.79	0.910593
Wölpert Anette	1975	VfL Waiblingen	124.7	257.61	0.907622
Wühn Katrin	1965	SC Chemie Halle	117.86	243.77	0.906541
Wulsch Sigrid Elisabeth	1953	Bielefelder TG	125.12	255.02	0.919928
Wüstenhagen Carmen	1973	LG Nike SCC Berlin	121.53	246.7	0.923667
Zaituc Luminita	1968	LG Braunschweig	124.43	246.33	0.947129
Zauber Angelika	1958	SC Dynamo Berlin	120.92	239.9	0.945081

## Sheet: 1500-3000
name, first name	year of birth	club	sec 1500m	sec 3000m	KsA
Ader Angelika	1956	SC Traktor Schwerin	259.9	574.3	0.905102
Bahn Ines	1967	ASK Vorwärts Potsdam	260	561.93	0.925382
Bartels Astrid	1963	LG Nord-West Hamburg	257.61	562.29	0.916289
Barth Birgit	1962	SC Dynamo Berlin	243.9	531.04	0.918575
Beck Ulrike	1961	TV Konstanz	257.43	537.95	0.957078
Benfares Sara	2001	LC Rehlingen	247.3	536.36	0.922142
Benfares Selma	1999	LC Rehlingen	256.41	557.03	0.920633
Biba Iris Gerda	1964	LAZ Main-Kinzig	252.07	534.99	0.942335
Bibernell Ines	1965	SC Chemie Halle	245.64	529.8	0.927293
Bletsch Yvette	1965	SC Karl-Marx-Stadt	245.12	571.6	0.857663
Böker Stefanie	1957	Bielefelder TG	259.8	559.62	0.928487
Breit Elisabeth	1964	DSC Oldenburg	260.78	558.45	0.933942
Breitenbach Anke	1969	LG Bayer Leverkusen	256.65	547.1	0.93822
Brömmel Rahel	2002	LG Olympia Dortmund	261.44	566.44	0.923099
Bruns Anne	1974	LAV Meppen 91	249.12	574	0.868014
Bühler Sigrid	1979	TSV Bayer 04 Leverkusen	259.94	571.1	0.910313
Burkard Elena	1992	LG farbtex Nordschwarzwald	246.51	520.46	0.947277
Coqui Eva-Christina	1968	LG Anger/Piding	261.04	572.97	0.911182
Coutellier Vera	1995	ASV Köln	250.71	548.5	0.914166
daFonseca-Wollheim Kristina	1972	SV Halle	241.42	517.3	0.933385
Danner Christiane	1988	LG Telis Finanz Regensburg	259.47	570.03	0.910373
Dattke Miriam	1998	LG Telis Finanz Regensburg	256.59	539.24	0.951673
Deselaers Ines	1963	LAV Düsseldorf	251.47	571.23	0.880451
Dietz Maria	1996	LAC Quelle Fürth	258.03	560.4	0.920878
Dörre Katrin	1961	SC DHfK Leipzig	258.66	544.01	0.950938
Dziuk Christina	1965	SC Dynamo Berlin	261.55	567.71	0.921421
Eckhardt Uta Maria	1967	Eintracht Frankfurt	255.07	562.1	0.907561
Finke Christiane	1962	LG Göttingen	259.96	550.13	0.945086
Fischer Susanne	1968	SC Dynamo Berlin	252.69	557.04	0.90726
Fleischer Andrea	1963	SC Motor Jena	252.93	548.49	0.922278
FrankeI Sylvia	1955	SC Motor Jena	256.4	559	0.917352
Franzis Elisabeth	1962	SV Sonsbeck 1919	252.7	545.7	0.92615
Friedmann Birgit	1960	Eintracht Frankfurt	245.9	523.65	0.939177
Friedrich Kathleen	1977	LAC Erdgas Chemnitz	244.27	557.48	0.876336
Gärtner Christiane	1964	SC Einheit Dresden	260.14	570.35	0.912212
Gehring Anna	1996	ASV Köln	260.76	571.21	0.913009
Gerdes Roswitha	1961	ASV Köln	244.41	534.6	0.914366
Geukes Nicole	1969	DJK Lowick	259.38	567.41	0.91426
Granz Caterina	1994	LG Nord Berlin	245.6	553.02	0.888214
Greschner Monika	1955	Jugend 07 Bergheim	256.7	553.8	0.927049
Haak Ute	1966	LAC Quelle Fürth	257.81	560.98	0.919142
Hain Jeanette	1966	SC Dynamo Berlin	256.85	545.55	0.941619
Harrer Corinna	1991	LG TF Regensburg	244.3	535.47	0.912469
Hartmann Karen	1970	Schweriner SC	249.45	547.67	0.91095
Hartthaler Kerstin	1953	SC Turbine Erfurt	261.2	566.6	0.921991
Heim Thea	1992	LG Telis Finanz Regensburg	252.94	560.41	0.902696
Heldt Ursula	1956	TSV Salzgitter	261	568	0.919014
Hermann Katharina	1952	SC Einheit Dresden	253.2	541.8	0.934662
Heuing Mathilde	1952	LG Gütersloh	254.67	555.9	0.916244
Hiller Julia	1987	LAC Quelle Fürth/München	259.63	553.82	0.937597
Hirscher Kerstin	1989	LAC Quelle Fürth	257.78	553.26	0.931858
Hodey Gudrun	1947	VfL Eintracht Hagen	259.61	557.6	0.931169
Hoffmann Katje	1971	SCC Berlin	250.12	536.73	0.932014
Hoffmann Vera	1996	LC Rehlingen	251.44	552.27	0.910569
Hofmann Elvira	1961	TV Bad Mergentheim	256.4	547.4	0.936792
Horna Annett	1987	LC Rehlingen	250.98	573.66	0.875013
Huber Maika	1970	SC Traktor Schwerin	258.19	555.44	0.929677
Hüls Annette	1966	TV 1860 Detmold	257.79	553.67	0.931205
Janhsen Frieda	1965	VfL Ockenhausen	259.7	559.95	0.927583
Jäsert Lisa	1992	SC Magdeburg	259.06	566.1	0.915245
Jeorgakopulos Caroline	1969	LG HNF Hamburg	256.01	549.88	0.931149
Jerschabek Birgit	1969	Schweriner SC	254.81	545.04	0.935014
Jooß Jutta	1960	VfL Sindelfingen	261.2	563.22	0.927524
Karhoff Andrea	1974	ASV Köln	250.89	536.79	0.934779
Kemper Vera	1953	TuS 1889 Neuenkamp	260.7	552.13	0.944343
Kick Julia	1990	LG Telis Finanz Regensburg	250.9	562.89	0.891471
Kießling Ellen	1968	SC Einheit Dresden	244.44	526.99	0.927684
Kleffel Heike	1958	SC Motor Jena	258.3	560.1	0.922335
Klein-Arndt Melanie	1975	ASC Rosellen Neuss	257	572.27	0.898177
Klein Hanna	1993	LAV Stadtwerke Tübingen	242.58	525	0.924114
Kley Kathrin	1968	SC Turbine Erfurt	258.75	550.57	0.939935
Knetsch Sabine Charlotte	1966	LG Bayer Leverkusen	259.82	558.73	0.930038
Kock Maren	1990	LG TF Regensburg	247.56	530.12	0.933977
Körner Hildegard	1959	SC Turbine Erfurt	238.67	572.4	0.833927
Köster Dörte	1973	SC Empor Rostock	256.45	544.68	0.941654
Koubaa Sanaa	1985	TSV Bayer 04 Leverkusen	253.48	560.65	0.904236
Kramer Nina	1990	LG Hilden	261.51	572.67	0.913301
Kraus Brigitte Helene	1956	ASV Köln	241.54	515.11	0.937819
Krebs Denise	1987	TV Wattenscheid 01	246.01	550.08	0.894452
Krott Martina-Agnes	1958	LAV Bayer Uerdingen/Dorm.	247	568.32	0.869229
Kühnemund Sylvia	1974	SV Halle	245.96	573.59	0.857616
Kukel Monika	1966	ASK Vorwärts Potsdam	253.66	546.27	0.928698
Kullmann Angelika	1956	TV Mettmann	257.9	566.5	0.910503
Kunkel Sabine	1964	VfL Wolfsburg	255.07	538.54	0.947265
Lehmann Eva-Maria	1958	SCC Berlin	257.5	561.48	0.917219
Leist Sabine	1966	SC Traktor Schwerin	250.39	546	0.917179
Lenske Gerlinde	1979	LG SV Rülzheim	257.33	571.49	0.900558
Lichtenfeld Yvonne	1969	SC Chemie Halle	255.46	548.47	0.931537
Liebich Beate	1958	SC Turbine Erfurt	239.9	540.93	0.886991
Mai Christina Angela	1961	LG Olympia Dortmund	259.98	534.16	0.973416
Maisch Ulrike	1977	1.LAV Rostock	258.94	560.79	0.923483
Mai Yvonne	1965	SC Neubrandenburg	242.69	529.97	0.915863
Mann Sabine	1965	ASV Köln	253.53	547.85	0.925545
Manz Veronika	1959	Salamander Kornwestheim	259.68	569.7	0.911638
Mauer Birgit	1963	SC Cottbus	259.61	556.19	0.93353
Merten Christa	1944	SV Bayer 04 Leverkusen	252.6	560.6	0.901177
Merten Silvia	1967	Barmer TV 1846 Wuppertal	257.75	558.89	0.922364
Metzner Claudia	1966	BV Teutonia Lanstrop	251.99	543.41	0.92744
Mewis Petra	1956	TSC Berlin	258.7	569.4	0.908676
Meyer Lea	1997	ASV Köln	250.06	542.25	0.922305
Michallek Vera	1958	LG Frankfurt	244.29	527.62	0.926007
Micus Anja	1963	LC Paderborn	261.08	572.2	0.912548
Mikitenko Irina	1972	LG Eintracht Frankfurt	246.08	510.39	0.964282
Möckel Uta	1964	SC Motor Jena	259.79	562	0.92452
Mödl Maria	1954	MTV 1881 Ingolstadt	256.8	565	0.909027
Möldner Antje	1984	SC Potsdam	248.81	540.74	0.920257
Neuhaus Beatrix	1963	MC Menden	253.32	545.49	0.92878
Nußbeck Sylvia	1977	TSV Bayer 04 Leverkusen	256.42	548.04	0.935771
OehmeHeike	1963	SC Cottbus	242.9	553.74	0.877307
Oppat Manuela	1963	SC Dynamo Berlin	253.33	570.71	0.887771
Pfeiffer Astrid	1964	SC Dynamo Berlin	244.42	548.64	0.891003
Pfüller Antje	2002	LG Region Karlsruhe	258.81	569.97	0.908153
Pingpank Svenja	1996	Hannover Athletics	258.23	557.26	0.926785
Pippig Uta	1965	SCC Berlin	254.8	520.99	0.978138
Pohl Veronica	1985	LG ASV/DSHS Köln	260.48	564.06	0.92359
Ranz Gerda	1944	TV Erkheim	258.5	560.2	0.922885
Reh Alina	1997	SSV Ulm 1846	253.11	528.05	0.958659
Rehberg Maya	1994	SG TSV Kronshagen/Kieler TB	257.54	555.39	0.92742
Restle Simret	1984	LG Eintracht Frankfurt	256.07	545.99	0.938003
Roggel Anja	1995	LAV Bayer Uerding./Dormagen	257.27	566.25	0.90868
Sauer Ursula	1960	SC Turbine Erfurt	252.6	537.59	0.93975
Schäning Anke	1970	SC Traktor Schwerin	253.15	532.01	0.951674
Schenk Anette	1966	LG Bayer Leverkusen	259.85	567.59	0.915626
Schlichtherle Susanne	1961	TSV Bad Wörishofen	258.51	569.22	0.908296
Schmidt Birgit-Maria	1963	LC Paderborn	248.19	532.39	0.932362
Schulz Klara-Gudrun	1961	LAZ bellanett Rhede	256.13	560.87	0.913331
Schulz Melanie	1979	SV Creaton Großengottern	252.42	536.46	0.941058
Schwarzbauer Gabriele	1968	MTV 1881 Ingolstadt	251.48	545.67	0.921729
Soeder Christiane	1975	LG Remscheid	261.05	559.59	0.933005
Stief Christine	1971	LAC Quelle Fürth/München	259.19	556.12	0.932137
Strotzer Waltraud	1952	SC Motor Jena	246.14	549.4	0.896032
Suffa Laura Franziska	1978	LG Nord Berlin	260.41	559.68	0.930567
Sujew Diana	1990	LT Haspa Marath. Hamburg	245.62	527.68	0.930943
Sujew Elina	1990	SC Potsdam	247.36	537.56	0.920307
Sussmann Jana	1990	LT Haspa-Marathon Hamburg	255.91	546.35	0.936799
Teegen Isabell	1993	SC Rönnau 74	257.17	552.8	0.930427
Teske Charlotte	1949	ASC Darmstadt	254.38	538.05	0.945563
Themann Tabea	1992	SV Molbergen	254.55	555.61	0.91629
Theophil Nicole	1968	LG Bayer Leverkusen	258.37	571.46	0.904245
Theuss Bianca	1960	MSV Duisburg	256.21	567.21	0.903404
Thieke Stephanie	1986	LG Emstal Dörpen	258.42	562.73	0.918451
Vetter Heidrun	1961	TSV Genkingen	254.86	550.62	0.92572
Walter Doreen	1976	LAC Erdgas Chemnitz	250.8	553.9	0.905579
Wartenberg Christiane	1956	C Chemie Halle	237.71	539.4	0.881387
Wassiluk Petra	1969	ASC Darmstadt	256.62	539.56	0.95122
Weiss Sabine	1957	LG Bayer Leverkusen	256.27	558.85	0.917133
Winkelmann Antje Petra	1965	LG Göttingen	256.09	540.03	0.948429
Wolf Kathrin	1966	LAC Quelle Fürth/München	259.74	551.16	0.942521
Wölm Christiane	1965	LGO Euskirchen/Erftstadt	257.53	566.31	0.909502
Wrede Linda	1993	LT DSHS Köln	260.31	570.69	0.912264
Wulsch Sigrid Elisabeth	1953	Bielefelder TG	255.02	540.15	0.944256
Zaituc Luminita	1968	LG Braunschweig	246.33	533.72	0.923068
Zauber Angelika	1958	SC Dynamo Berlin	239.9	529.61	0.90595

## Sheet: 3000-5000
name, first name	year of birth	club	sec 3000m	sec 5000m	KsA
Abel Svenja	1983	TV Lahr	567.91	986.2	0.959761
Allmannstötter Gabriele	1960	VfL Waldkraiburg	568.79	987.81	0.959682
Amrhein Fabienne	1992	MTG Mannheim	571.95	972.39	0.980317
Bard Bettina	1972	LG Braunschweig	560.13	994.98	0.93826
Beck Ulrike	1961	TV Konstanz	537.95	957.52	0.93636
Benfares Sara	2001	LC Rehlingen	536.36	920.94	0.970675
Benfares Selma	1999	LC Rehlingen	557.03	974.29	0.952882
Bermes Chiara	1993	Lauftreff Schweich	569.67	983.85	0.965035
Biba Iris Gerda	1964	DJK Freigericht	534.99	926.24	0.962655
Bibernell Ines	1965	SC Chemie Halle	529.8	927.05	0.952484
Bockel Karen	1975	VfL Waiblingen	565.63	980.98	0.960995
Böker Stefanie	1957	TG Bielefeld 1848	559.62	992.97	0.939303
Bruns Anne	1974	TV Meppen	574	972.07	0.984154
Bruns Ulrike	1953	ASK Vorwärts Potsdam	516.38	941.46	0.914148
Bultmann Birte	1974	LG Braunschweig	556.19	964.7	0.960903
Burkard Elena	1992	LG farbtex Nordschwarzwald	520.46	912.17	0.950956
Clemens Svenja	2002	LG Odenwald	573.69	1006.42	0.950051
Coutellier Vera	1995	ASV Köln	548.5	965.85	0.946489
da Fonseca- Wollheim Kristina	1972	SV Halle	517.3	898.43	0.959637
Dattke Miriam	1998	LG Telis Finanz Regensburg	539.24	928.37	0.968077
Dreher Claudia	1971	LG Olympia Dortmund	546.83	933.83	0.975963
Dreier Verena	1985	LG Sieg	563.18	970.87	0.966796
Drews Cathleen	1979	LSV Pirna	560.02	1006.28	0.927542
Effler Constanze	1975	SCC Berlin	571.6	976.55	0.975543
Finke Christiane	1962	LG Göttingen	550.13	984	0.931792
Fischer Ingrid	1961	TuS Rot-Weiß Koblenz	561.52	987.79	0.947435
Fleischer Andrea	1963	TuS Jena	548.49	946.6	0.965719
Frank Annika	1992	LAV Stadtwerke Tübingen	571.54	1001.79	0.950865
Franzis Elisabeth	1962	SV Sonsbeck 1919	545.7	992.28	0.916576
Friedmann Birgit	1960	Eintracht Frankfurt	523.65	946.38	0.922198
Gehring Anna	1996	SC Itzehoe	571.21	948.02	1.00422
Gerdes Christina	1995	BV Garrel	567.04	979.85	0.964501
Geukes Nicole	1969	DJK Lowick	567.41	987.49	0.957664
Götte Marion	1960	TV Wattenscheid 01	562.49	994.2	0.942952
Granz Caterina	1994	LG Nord Berlin	553.02	946.64	0.973654
Grossert Doris	1961	LG Braunschweig	557.4	984.12	0.943991
Günther Steffi	1984	LAC Erdgas Chemnitz	574.23	1002.71	0.954463
Hahner Anna	1989	PSV Grün-Weiß Kassel	573.44	967.33	0.988012
Hahner Lisa	1989	RUN2SKY.com	558.42	949.83	0.97986
Hahn Susanne	1978	SV Schlau.com Saar 05	553.9	943.41	0.978542
Hain Jeanette	1966	SC Dynamo Berlin	545.55	982.3	0.925634
Hanner Elisabeth	1966	Moerser TV 1850	570.76	978.98	0.971692
Harrer Corinna	1991	LT TF Regensburg	535.47	941.73	0.947671
Heckel Emma	2002	LG Telis Finanz Regensburg	558.64	952.78	0.977211
Hegmann Carmen	1970	SC Freudenberg	568.09	1007.45	0.939815
Heim Thea	1992	LG Telis Finanz Regensburg	560.41	968.34	0.964554
Heinig Katharina	1989	LG Eintracht Frankfurt	572.41	1005.55	0.948751
Heinze Judith	1981	Hallesche LA-Freunde	572.31	995.92	0.957758
Herzberg Kerstin	1966	SC Motor Jena	565.8	959	0.983316
Heuing Mathilde	1952	Bielefelder TG	555.9	986	0.939655
Hiller Julia	1987	LAC Quelle Fürth/München	553.82	978.97	0.942862
Hilschenz Marina	1981	LG Wedel/Pinneberg	559.13	982.5	0.948482
Hoffmann Katje	1971	SCC Berlin	536.73	963.96	0.927995
Hofmann Elvira	1961	TV Bad Mergentheim	547.4	972.2	0.938421
Hottenrott Laura	1992	GSV Eintracht Baunatal	567.7	955.87	0.989849
Hüls Annette	1966	TV Detmold	553.67	1001.5	0.921401
Hutterer Heidi	1959	TG Landshut	557.96	976.8	0.95202
Immerz Claudia	1966	VfL Waiblingen	562.09	1004.31	0.932796
Islinger Marlene Gomez	1993	SSV Ulm 1846	574.04	994.29	0.962228
Jamrozy Ute	1964	Polizei SV Eutin	552.12	950.64	0.967979
Jerschabek Birgit	1969	Schweriner SC	545.04	953.06	0.95314
Jurenka Mia	2002	VfL Sindelfingen	571.61	1005.36	0.947604
Kalinowski Tanja	1968	ASV Köln	558.57	964.4	0.965315
Karhoff Andrea	1974	ASV Köln	536.79	930.23	0.961751
Kemper Vera	1953	TuS 89 Neuenkamp	552.13	1002.6	0.91783
Kieninger Renate	1954	LG Offenburg	562.8	979.1	0.958023
Kirtzel Carolin	1995	SV Werder Bremen	549.73	961.61	0.952794
Kistner Sarah	1997	MTV Kronberg	570.68	986.17	0.964472
Klein- Arndt Melanie	1975	LAV Bayer Uerdingen/Dorm.	572.27	986.99	0.966356
Klein Hanna	1993	SG Schorndorf	525	891.71	0.981261
Kleinmann Larissa	1978	VfL Waiblingen	556.75	958.12	0.968476
Klosterhalfen Konstanze	1997	TSV Bayer Leverkusen S	500.07	866.76	0.96157
Kock Maren	1990	LG TF Regensburg	530.12	922.75	0.9575
Köster Dörte	1973	SC Empor Rostock	544.68	916.32	0.990702
Koubaa Sanaa	1985	TSV Bayer 04 Leverkusen	560.65	1000.42	0.934024
Kramer Nina	1990	LG Hilden	572.67	962.49	0.991647
Krause Gesa Felicitas	1992	LG Eintracht Frankfurt	542.04	924.53	0.977145
Kraus Melanie	1974	TSV Bayer 04 Leverkusen	549.22	941.89	0.97184
Krebs Denise	1987	TSV Bayer o4 Leverkusen	550.08	926.58	0.989445
Kröckert Christina	1989	TSV Bayer 04 Leverkusen	566.68	965.96	0.977749
Kühnemund Sylvia	1974	SV Halle	573.59	966.6	0.989016
Kukel Monika	1966	ASK Vorwärts Potsdam	546.27	983.1	0.926101
Kümpers Julia	1992	Leichtathletikclub Kronshagen	562.01	981.56	0.95428
Kunkel Sabine	1964	VfL Wolfsburg	538.54	972.7	0.922758
Lange Peggy	1973	LG Olympia Dortmund	572.44	998.2	0.955787
Lehmann Eva- Maria	1958	SCC Berlin	561.48	1003.8	0.932257
Leukel Christiane	1968	LG Andernach/Neuwied	564.63	993.3	0.947398
Lichtenfeld Yvonne	1969	SC Chemie Halle	548.47	1001	0.913203
Liebertz Petra	1960	VfL Wolfsburg	571.92	987.08	0.965677
Lokar Claudia Margareta	1964	LG Olympia Dortmund	523.11	907.62	0.960589
Lorch Britta	1968	SC 1880 Frankfurt	557.77	982.47	0.946204
Lutz Susanne	1987	LG Telis Finanz Regensburg	562.24	972.84	0.963228
Maak Petra	1964	LAV Bayer Uerdingen/Dorm.	563.76	974.54	0.964147
Maier Stephanie	1979	LG Leinfelden-Echterdingen	573.35	973.77	0.981323
Maisch Ulrike	1977	1.LAV Rostock	560.79	958.17	0.975453
Mann Sabine	1965	ASV Köln	547.85	981.44	0.930351
Mayer Domenika	1990	LG Telis Finanz Regensburg	553.03	952.95	0.967225
Meier Linda	2004	LAC Passau	574.07	979.38	0.976928
Metzner Claudia	1966	BV Teutonia Lanstrop	543.41	950.29	0.95306
Meyer Lea	1997	VfL Löningen	542.25	931.32	0.970397
Michallek Vera	1958	LG Frankfurt	527.62	941.68	0.933827
Michel Sylvia	1967	SC Turbine Erfurt	569.58	1003.2	0.946272
Mikitenko Irina	1972	LG Eintracht Frankfurt	510.39	882.03	0.964423
Mockenhaupt Sabrina	1980	LG Sieg	524.65	899.88	0.971704
Mohr Christina	1985	Gerolsteiner LGV	572.19	993.77	0.959628
Möldner Antje	1984	SC Potsdam	540.74	965.82	0.933128
Müller Isabelle	1971	SV Saar 05 Saarbrücken	563.35	987.93	0.950388
Neuhaus Beatrix	1963	LAV Menden	545.49	965.21	0.941919
Nußbeck Sylvia	1977	TSV Bayer 04 Leverkusen	548.04	949.99	0.961484
Oed Lisa	1999	SSC Hanau-Rodenbach	571.46	969.34	0.982559
Papenfuß Josina	2000	TSG Westerstede	558.39	990.59	0.939491
Pautmeier Maria	1967	TuS Solbad Ravensberg	571.59	987.4	0.964807
Petersen Birgit	1962	ASV Köln	568.17	993.1	0.953529
Pingpank Svenja	1996	Hannover Athletics	557.26	962.67	0.964782
Pippig Uta	1965	SCC Berlin	520.99	904.87	0.959604
Pirang Irene	1952	LG Bonn/Troisdorf	570.4	1005	0.945937
Pohlmann Antje	1968	LG Olympia Dortmund	561.31	973.98	0.960509
Pohl Veronica	1985	LG ASV/DSHS Köln	564.06	963.99	0.975218
Preßler Kerstin M.- L.	1962	LAC Halensee Berlin	537	937.47	0.954697
Pulte Johanna	2003	SG Wenden	557.1	989.89	0.937983
Reh Alina	1997	SSV Ulm	528.05	904.1	0.973436
Rehberg Maya	1994	SC Rönnau 74	555.39	990.49	0.934537
Reng Franziska	1996	LG Telis Finanz Regensburg	570.92	997.75	0.953679
Restle Simret	1984	LG Eintracht Frankfurt	545.99	945.55	0.962385
Riemann Sandra	1973	ESC Erfurt	563.41	982.34	0.955898
Schmidt Astrid	1963	LAV Aschaffenburg-Stadt	551.29	961.87	0.95524
Schmidt Friederike	1973	Dresdner SC 1898	551.89	999.6	0.920185
Schnabel Anja	1985	LAZ Salamander	566.44	978.18	0.965126
Schnuch Sabine	1962	LAV Bayer Uerdingen/Dorm.	562.66	1006.44	0.931766
Schöneborn Deborah	1994	LG Nord Berlin	574.71	949.81	1.00846
Schöneborn Rabea	1994	LG Nord Berlin	562.55	953.88	0.982915
Schrulle Mareike	1989	LG ASV/DSHS Köln	565.62	972.66	0.969198
Schulz Melanie	1979	SV Creaton Großengottern	536.46	931.67	0.959675
Schwennen Cornelia	1987	SC Concordia Emsbüren	564.29	973.16	0.966422
Soeder Christiane	1975	ASV Köln	559.59	988.08	0.943901
Soethout Jana Janine	1989	LG TF Regensburg	560.48	960.51	0.972539
Staab Klothilde	1961	LAC Quelle Fürth	566.1	982.71	0.9601
Stahl Jasmina	2002	Hannover 96	569.39	980.13	0.968222
Steinmetz Katrin	1966	USC Heidelberg	572.11	998.92	0.954548
Stephan Angelika	1952	LAC Quelle Fürth	570.9	1008.7	0.943293
Suffa Laura Franziska	1978	LG Nord Berlin	559.68	978.45	0.953345
Sujew Diana	1990	LT Haspa Marath.Hamburg	527.68	1006.43	0.873848
Sussmann Jana	1990	LT Haspa Marath.Hamburg	546.35	954.92	0.95357
Teske Charlotte	1949	ASC Darmstadt	538.05	919.54	0.975216
Themann Tabea	1992	SV Molbergen	555.61	980.01	0.944905
Tiedemann Anke	1975	SG TSV Kronshagen/KTB	572.73	996.69	0.95772
Vahlensieck Christa	1949	Barmer TV 1846	554.9	978.24	0.945405
Veith Gabriele	1956	SC Cottbus	530.68	921.9	0.959395
Veith Manuela	1974	ABC Ludwigshafen	571.83	991.65	0.961075
Vetter Heidrun	1961	TSV Genkingen	550.62	972.65	0.943505
Viellehner Julia	1985	LG Passau	570.49	985.98	0.964337
Vortmeier Anneke	2002	ASV Duisburg	558.06	1004.19	0.926219
Waeber Beate	1967	SWC 46 Regensburg	567.56	997.43	0.948371
Walter Doreen	1976	LAC Erdgas Chemnitz	553.9	964.6	0.957046
Wassiluk Petra	1969	ASC Darmstadt	539.56	915.17	0.982623
Weis Kira	2004	KSG Gerlingen	569.26	980.21	0.967922
Weiss Sabine	1957	LG Bayer Leverkusen	558.85	994.01	0.937029
Wennemar Sigrid	1967	LG Gütersloh	555.65	979.5	0.945465
Wessinghage Ellen	1948	TuS Rot-Weiß Koblenz	536.77	934.76	0.957055
Winkelmann Antje Petra	1965	LG Göttingen	540.03	940.14	0.957357
Wirdemann Meike	1963	LG Nord-West Hamburg	553.15	988.1	0.93302
Wolf Kathrin	1966	SC Einheit Dresden	551.16	948.84	0.96813
Wrede Linda	1993	LT DSHS Köln	570.69	987.13	0.963551
Zaituc Luminita	1968	LG Braunschweig	533.72	933.58	0.95282

## Sheet: 5000-10000
name, first name	year of birth	club	sec 5000m	sec 10,000m	KsA
Abel Svenja	1983	TV Lahr	986.2	2077.45	0.949433
Aehling Carolin	1989	LG TF Regensburg	984.18	2044.35	0.962829
Allmannstötter Gabriele	1960	VfL Waldkraiburg	987.81	2072.91	0.953066
Althaus Franziska	1998	TV Waldstraße Wiesbaden	976.51	2053.48	0.951078
Amrhein Fabienne	1992	MTG Mannheim	972.39	2026.14	0.959845
Autenrieth Annika	1997	LG farbtex Nordschwarzwald	1004.26	2108.5	0.952582
Bechtloff Mareike	1990	ASV Erfurt	988.3	2093.06	0.944359
Benfares Selma	1999	LC Rehlingen	974.29	2042.63	0.953956
Biba Iris Gerda	1964	Eintracht Frankfurt	926.24	1892.09	0.979065
Bibernell Ines	1965	SC Chemie Halle	927.05	1952.28	0.94971
Bienstein Heike	1986	LG Olympia Dortmund	998.18	2083.53	0.958162
Bockel Karen	1975	VfL Waiblingen	980.98	2141.19	0.916294
Böker Stefanie	1957	Bielefelder TG	992.97	2117.78	0.937746
Borgschulze Claudia	1964	Eintracht Hamm	958.37	1991.96	0.962238
Braun Jutta	1956	LG Frankfurt	1004.98	2144.5	0.937263
Bruns Ulrike	1953	ASK Vorwärts Potsdam	941.46	1879.76	1.00168
Bultmann Birte	1974	LG Braunschweig	964.7	2037.6	0.946898
Cronjäger Ines	1977	LG Seesen	987.7	2038.41	0.969089
Dattke Miriam	1998	LG TELIS FINANZ Regensburg	928.37	1893.77	0.980446
Dieterich Eva	1999	Laufteam Kassel	940.16	1945.7	0.966398
Dörfel Blanka	2	SCC Berlin	956.74	2034.69	0.940428
Dreher Claudia	1971	LG Olympia Dortmund	933.83	1961.9	0.951965
Dressel Daniela	1963	SSV Ulm 1846	996.77	2094.06	0.951998
Engelen Katrin	1976	LG Bäderkreis	990.3	2077.65	0.953289
Fischer Ingrid	1961	TuS Rot-Weiß Koblenz	987.79	2040.5	0.968184
Fischer Katja	1991	LAV Stadtwerke Tübingen	989.18	2116.65	0.934666
Franzis Elisabeth	1962	SV 1919 Sonsbeck	992.28	2010.6	0.987049
Gatzweiler Ursula	1988	ASV Köln	998.91	2100.06	0.951316
Gehring Anna	1996	ASV Köln	948.02	1940.37	0.977154
Gerdes Christina	1995	Hamburger SV	979.85	2084.64	0.940066
Gomell Annika	1991	USC Bochum	973.74	2034.72	0.957124
Götte Marion	1960	TV Wattenscheid 01	994.2	2048.64	0.970595
Griesche Cornelia	1993	DJK Ingolstadt	984.96	2098.97	0.938517
Gröber Hanna	1996	LAV Stadtwerke Tübingen	1004.86	2095.23	0.959188
Grossert Doris	1961	LG Braunschweig	984.12	1996.8	0.985697
Grüner Olivia	1969	LT Radolfzell	1002.41	2067.32	0.969768
Güldemeister Nicole	1982	SC Potsdam	1003.77	2056.71	0.976093
Hahner Anna	1989	RUN2SKY.com	967.33	2088.62	0.926286
Hahner Lisa	1989	RUN2SKY.com	949.83	2018.49	0.941129
Hahn Susanne	1978	SV Schlau.com Saar 05	943.41	2083.51	0.905597
Hain Jeanette	1966	SC Dynamo Berlin	982.3	2035.67	0.965088
Hanle Leah	1997	TSV Holzelfingen	962.46	2023.95	0.951071
Hanner Elisabeth	1966	Moerser TV	978.98	2033.04	0.96307
Harrer Corinna	1991	LG TF Regensburg	941.73	1947.75	0.966993
Heckel Emma	2002	LG TelisFinanz Regensburg	952.78	1985.02	0.95997
Heim Thea	1992	LG Telis Finanz Regensburg	968.34	2028.73	0.954627
Heinig Katharina	1989	LG Eintracht Frankfurt	1005.55	2015.18	0.997975
Heinze Judith	1981	TSV Bayer 04 Leverkusen	995.92	2097.97	0.949413
Herzberg Kerstin	1966	LBV Phönix Lübeck	959	1988.4	0.964595
Heuck Ingalena	1986	LG Stadtwerke München	989.96	2010.25	0.984912
Hilschenz Marina	1981	LG Wedel/Pinneberg	982.5	2089.62	0.940362
Hoffmann Elke	1964	TV Hatzenbühl	1009.52	2096.16	0.963209
Hoffmeister Kerstin	1967	SC Cottbus	994.5	2079.2	0.956618
Hofmann Elvira	1961	TV Bad Mergentheim	972.2	1991.3	0.976448
Högl Regina	1993	LG Region Landshut	983.83	2109.15	0.932916
Holtkamp Anna- Isabel	1955	ASV Köln	1008.85	2107.5	0.95739
Hottenrott Laura	1992	GSV Eintracht Baunatal	955.87	2023.41	0.944811
Hutterer Heidi	1959	TG Landshut	976.8	2040	0.957647
Imkamp Alexandra	1953	ESV Münster	1009.07	2127.7	0.948508
Jamrozy Ute	1964	PSV Eutin	950.64	1994.83	0.953104
Jeck Saskia	1976	ABC Ludwigshafen	991.71	2117.7	0.936592
Jerschabek Birgit	1969	Schweriner SC	953.06	1934.75	0.985202
John Jannika	1992	LAC Quelle Fürth	979.8	2095.31	0.935232
Kaiser Céline	1998	LAC Freiburg	979.75	2041.18	0.959984
Kalinowski Tanja	1968	ASV Köln	964.4	1988.36	0.970046
Kallenberg Friederike	1983	LAC Pliezhausen	999.42	2101.22	0.951276
Karsch Jutta	1961	LG Olympia Dortmund	969.62	2015.05	0.962378
Klein- Arndt Melanie	1975	ASC Rosellen Neuss	986.99	2142.99	0.921134
Kleine Linn Lara	2001	LG Olympia Dortmund	984.04	2059.42	0.955648
Kleinmann Larissa	1978	VfL Waiblingen	958.12	2000.05	0.958096
Klenk Carmen	1974	LG Karlstadt	1000.93	2093.66	0.956153
Kock Maren	1990	LG TF Regensburg	922.75	1994.32	0.925378
Körner Felicia	1996	LG Sempt	1004.67	2067.6	0.971822
Köster Dörte	1973	SC Empor Rostock	916.32	1966.63	0.931868
Kraus Melanie	1974	TSV Bayer 04 Leverkusen	941.89	1932.4	0.97484
Kröckert Christina	1989	TSV Bayer 04 Leverkusen	965.96	2047.43	0.943583
Kukel Monika	1966	ASK Vorwärts Potsdam	983.1	2022.24	0.972288
Kümpers Julia	1992	Leichtathletikclub Kronshagen	981.56	2035.27	0.96455
Kunkel Sabine	1964	VfL Wolfsburg	972.7	2087.47	0.931942
Lange Peggy	1973	LG Olympia Dortmund	998.2	2096.31	0.95234
Lehmann Eva- Maria	1958	SCC Berlin	1003.8	2062.34	0.973457
Lehmann Martina	1967	TV Jahn Wolfsburg	1009.35	2102.01	0.960367
Lennartz Birgit	1965	ASV Sankt Augustin	999	2070.78	0.964854
Leukel Christiane	1968	LG Andernach/Neuwied	993.3	2101.84	0.945172
Liebertz Petra	1960	VfL Wolfsburg	987.08	2037.76	0.968789
Lokar Claudia Margareta	1964	LG Olympia Dortmund	907.62	1917.9	0.946473
Lorch Britta	1968	LG Bayer Leverkusen	982.47	2100.4	0.935508
Lutz Susanne	1987	LG TF Regensburg	972.84	2051.45	0.948441
Maak Petra	1964	LAV Bayer Uerdingen/Dorm.	974.54	2071.1	0.941084
Maciossek- Krause Edith	1960	SCC Berlin	1007.49	2108.23	0.955769
Mai Christina	1961	LG Olympia Dortmund	947.73	2017.85	0.939346
Maisch Ulrike	1977	1.LAV Rostock	958.17	2024.78	0.946444
Mann Sabine	1965	ASV Köln	981.44	2066.9	0.949673
Mattern Carolin	1983	OSC Berlin	1000.44	2147.79	0.931599
Mayer Domenika	1990	LG TELIS FINANZ Regensburg	952.95	1963.82	0.970506
Metzner Claudia	1966	LG Sauerland	950.29	1949.86	0.974726
Michallek Vera	1958	LG Frankfurt	941.68	2048	0.919609
Michel Sylvia	1967	SC Turbine Erfurt	1003.2	2087.5	0.96115
Mikitenko Irina	1972	Eintracht Frankfurt	882.03	1889.55	0.933587
Mockenhaupt Hildegard	1954	LG Sieg	1007.4	2090.72	0.963687
Mockenhaupt Sabrina	1980	Kölner Verein für Marathon	899.88	1874.21	0.960277
Möller Michaela	1973	LG Ratio Münster	939.12	1951.91	0.962257
Morgenroth Carla	1995	LAC Olympia 88 Berlin	1006.31	2144.69	0.93842
Moser Tania	1990	Spiridon Frankfurt	1000.63	2072.58	0.965589
Müller Isabelle	1971	SV Saar 05 Saarbrücken	987.93	2073.88	0.952736
Neuhaus Beatrix	1963	Marathon-Club Menden	965.21	2119.2	0.910919
Oed Lisa	1999	SSC Hanau-Rodenbach	969.34	2010.88	0.964095
Ojstersek Svenja	1994	LG TelisFinanz Regensburg	972.15	2025.08	0.96011
Östringer Maren	1974	TSG 1885 Wiesloch	977.03	2022.62	0.966103
Pautmeier Maria	1967	LV Oelde	987.4	2043.5	0.966381
Petersen Birgit	1962	ASV Köln	993.1	2126.61	0.933975
Pingpank Svenja	1996	Hannover Athletics	962.67	1988.72	0.96813
Pippig Uta	1965	SCC Berlin	904.87	1881.36	0.961932
Pohlmann Antje	1968	LG Olympia Dortmund	973.98	2076.85	0.93794
Pohl Veronica	1985	TSV Bayer 04 Leverkusen	963.99	2039.02	0.945542
Rappold Marina	1997	LG Telis Finanz Regensburg	1000.2	2128.57	0.939786
Reefschläger Birgit	1960	LG Olympia Dortmund	1003.06	2113.6	0.949148
Reh Alina	1997	SSV Ulm	904.1	1879.87	0.961875
Reng Franziska	1996	LG TF Regensburg	997.75	2063.93	0.966845
Renz Sylvia	1969	LG Nike Berlin	987.34	2000	0.98734
Restle Simret	1984	PSV Grün-Weiß Kassel	945.55	1986.84	0.951813
Riemann Sandra	1973	ESC Erfurt	982.34	2012.44	0.976268
Ritter Celine	1998	TuS Köln rrh.	958.77	2022.9	0.947916
Schäfer Monika	1959	LAC Quelle Fürth/München	923.46	1947.2	0.9485
Schedler Michaela	1982	Post-Sport Telekom Trier	981.04	2036.02	0.963684
Schlosser Doris	1944	OSC 1960 Höchst	1005.74	2115.1	0.951009
Schmidt Astrid	1963	LAV Aschaffenburg	961.87	2002.3	0.960765
Schmidt Friederike	1973	LG Dresdner SC 1898	999.6	2028.62	0.985498
Schöneborn Deborah	1994	LG Nord Berlin	949.81	1982.87	0.958015
Schöneborn Rabea	1994	LG Nord Berlin	953.88	1975.96	0.965485
Schön Maike	1989	LAZ PUMA Rhein-Sieg	1008.74	2146.36	0.939954
Schulte Tatjana	1997	LC Paderborn	973.86	2055.15	0.947726
Schultz Eva	1995	LG Passau	992.18	2131.69	0.930886
Schulz Jenny	1983	Skills 04 Frankfurt	1004.05	2132.23	0.941784
Schulz Melanie	1979	SV Creaton Großengottern	931.67	1960.09	0.95064
Schuri Monika	1969	Laufgem.Wehringen	979.91	2070.23	0.946668
Siewert Carmen	1972	LG Vorpommern	990.08	2083.39	0.950451
Soethout Jana Janine	1989	LG TF Regensburg	960.51	1982.02	0.969223
Staab Klothilde	1961	LAC Quelle Fürth	982.71	2110.88	0.93109
Stahl Jasmina	2002	Hannover 96	980.13	2051.12	0.955702
Starke Ursula	1956	LG Seesen	990.71	2023.66	0.979127
Stemper Melanie	1991	TSV Bayer 04 Leverkusen	1004.86	2132.25	0.942535
Stöcker Nina	1992	LG Ratio Münster	995.56	2107.38	0.944832
Stöwer Eva- Maria	1985	LAC Veltins Hochsauerland	982.91	2008.28	0.978858
Strate Stephanie	1991	SV Brackwede	1006.39	2139.39	0.94082
Streck Kerstin	1969	TV Trebur	991.3	2068.5	0.958472
Tanner Natalie	1995	LG Eintracht Frankfurt	955.86	1956.15	0.977287
Tertsch Lisa	1998	ASC Darmstadt	963.15	2019.13	0.954025
Teske Charlotte	1949	ASC Darmstadt	919.54	1920.26	0.957724
Tränkle Melina	1992	LG Region Karlsruhe	985.92	2069.7	0.952718
Ullrich Andrea Kathrin	1967	SC Berlin	898.71	1863.62	0.964478
Vahlensieck Christa	1949	Barmer TV 1846 Wuppertal	978.24	2019.4	0.968842
Veith Gabriele	1956	SC Cottbus	921.9	1937.22	0.951776
Veith Manuela	1974	ABC Ludwigshafen	991.65	2066.74	0.959627
Vetter Heidrun	1961	LG Pfullingen	972.65	2022.86	0.961658
Viellehner Julia	1985	LG Passau	985.98	2097.37	0.940206
Volke Steffi	1976	LG TF Regensburg	1005.61	2060.17	0.97624
Waeber Beate	1967	LLC Marathon Regensburg	997.43	2047.48	0.9743
Wassiluk Petra	1969	ASC Darmstadt	915.17	1912.2	0.957191
Wehr Katharina	1996	ASV Duisburg	1008.67	2108.11	0.956942
Weinhold Birgit	1964	SC Motor Jena	987	2021.5	0.976503
Wessinghage Ellen	1948	TuS Rot-Weiß Koblenz	934.76	1972.93	0.947586
Wolf Kathrin	1966	LAC Quelle Fürth/München	948.84	2118.62	0.895715
Zaituc Luminita	1968	LG Braunschweig	933.58	1955.9	0.95463
