# Supplementary material for: Sex-specific characteristics of special endurance and performance potential in female runners
Source: BMC Res Notes. 2025 Apr 26;18:196. doi: 10.1186/s13104-025-07256-6 (PMC12032771; doi:10.1186/s13104-025-07256-6)
Supplement: Supplementary file 13 — Supplementary Material 13 [file 13104_2025_7256_MOESM13_ESM.xlsx]

## Sheet: 100-200
name, first name	year of birth	club	sec 100m	sec 200m	KsA
Andl, Gabi	1953	Karlsruher SC	12.04	24.74	0.973323
Angehrn, Isabelle	1978	LC Rothaus Breisgau	12.11	24.66	0.982157
Angerstein, Anke	1966	LG Karlsruhe	12.01	24.65	0.974442
Ansel, Sandra	1969	TSG Akus Weinheim	11.91	24.93	0.955475
Baumgarten, Helen	2003	SR Yburg Steinbach	11.95	24.22	0.986788
Becker, Cosima	1966	TV Eberbach	11.81	24.09	0.98049
Brandenberger, Heike	1970	MTG Mannheim	12.14	24.42	0.994267
Burghardt, Alexandra	1994	MTG Mannheim	11.32	23.57	0.960543
Cibis, Anne	1985	MTG Mannheim	11.17	23.15	0.965011
Diel, Antje	1957	TV Lahr	12.01	24.29	0.988884
Fahrendorf, Doreen	1968	TV 1883 Schriesheim	12.14	24.54	0.989405
Fleig, Angela	1986	USC Freiburg	11.82	24.01	0.98459
Freiländer, Sabine	1961	MTG Mannheim	11.9	24.44	0.973813
Frey, Carina	1994	MTG Mannheim	11.65	24.41	0.954527
Früh, Verena	1989	Ettlinger SV	12.14	24.75	0.98101
Gaus, Katharina	1972	MTG Mannheim	12.08	24.9	0.970281
Gonska, Nadine	1990	MTG Mannheim	11.43	22.79	1.00307
Grausam, Ute	1965	LC 80 Pforzheim	12.04	24.37	0.9881
Habermehl, Anette	1961	Karlsruher SC	11.74	24.04	0.976705
Hähnle, Bärbel	1949	USC Heidelberg	11.64	24.44	0.952537
Hanusa, Christine	1958	LG Villingen	11.94	24.44	0.977087
Hehl, Miriam	1991	TV Wehr	12.07	24.85	0.971429
Heinz, Ulrike	1967	USC Freiburg	11.74	23.74	0.989048
Hufschmidt, Deborah	1990	MTG Mannheim	11.58	23.93	0.967823
Kaltenmaier, Alena	1964	SG Walldorf Astoria 1902	11.7	23.55	0.993631
Kaul, Petra	1967	StTV Singen	11.69	23.73	0.985251
Klein, Helga	1931	SG Mannheim	12.04	24.64	0.977273
Klein, Ilona	1965	MTG Leasomed Mannheim	11.99	24.6	0.974797
Kleyer, Carolin	1999	LG Region Karlsruhe	11.95	24.86	0.961384
Kohler, Ingrid	1961	LG Offenburg	11.91	24.42	0.97543
Kränzle, Celina	1997	MTG Mannheim	11.91	24.52	0.971452
Kwadwo, Yasmin	1990	MTG Mannheim	11.3	24.25	0.931959
Langbein, Martha	1941	USC Heidelberg	11.94	24.84	0.961353
Lehmann, Karin	1962	TV Konstanz	12.02	23.71	1.01392
Leistenschneider, Nicole	1967	MTG Mannheim	11.95	24.06	0.99335
Leuthner, Jasmin	1987	LG Offenburg	12.01	24.49	0.980808
Lippe, Gabi	1967	MTG Mannheim	11.44	23.97	0.954526
Lobe, Ricarda	1994	MTG Mannheim	11.53	23.87	0.966066
Mayer, Helga	1960	WG Radolfzell-Stahringen	11.94	24.57	0.971917
Mihambo, Malaika	1994	LG Kurpfalz	11.21	23.9	0.938075
Möllinger, Anne	1985	MTG Mannheim	11.33	23.5	0.964255
Müller, Tabea	1998	LG Offenburg	12.04	24.9	0.967068
Mulrain, Sabrina	1978	MTG Mannheim	11.66	23.57	0.989393
Münch, Nicole	1976	MTG Mannheim	12.08	24.82	0.973409
Nippgen, Lisa	1997	MTG Mannheim	11.2	23.46	0.954817
Odhiambo, Joyce	1962	USC Heidelberg	11.84	24.56	0.964169
Philipp, Andrea	1972	TV 1883 Schriesheim	11.34	23.45	0.967164
Rauch, Verena	1983	LG Leimen/St. Ilgen	11.8	24.39	0.96761
Ringhoffer, Pia Julianna	1998	LG Region Karlsruhe	11.72	24.35	0.962628
Savari, Ulrike	1964	USC Heidelberg	11.46	23.48	0.97615
Schulte, Verena	1967	MTG Leasomed Mannheim	11.95	24.28	0.984349
Schütt, Tanja	1975	LG Offenburg	11.74	24.28	0.967051
Schynowski, Eva	1972	LC Breisgau	11.91	24.2	0.984298
Seckler, Uschi	1956	LG Bühl	11.84	24.34	0.972884
Seer, Tamara	1989	MTG Mannheim	11.84	23.99	0.987078
Siepelt, Sabine	1977	MTG Mannheim	11.97	24.52	0.976346
Sonn, Caren	1968	MTG Mannheim	12.1	24.44	0.99018
Staub, Sabine	1962	Ettlinger SV	11.75	24.71	0.951032
Steidle, Tatjana	1986	USC Freiburg	11.77	24.4	0.964754
Uhrig, Kathrin	1979	LC Rothaus Breisgau	11.92	24.93	0.956278
Vögeli-Fandel, Stefanie	1967	TSG 1862 Weinheim	12.08	24.64	0.980519
Wage, Christiane	1963	TV Lahr	11.65	24.14	0.965203
Wahl, Christine	1967	USC Heidelberg	11.7	23.73	0.986094
Wallmann, Katrin	1998	MTG Mannheim	11.67	24.1	0.968465
Wenzel, Daniela	1996	MTG Mannheim	11.9	24.86	0.957361
Zaczkiewicz, Claudia	1962	MTG Leasomed Mannheim	11.61	23.92	0.970736
Zinth, Doris	1957	LG Offenburg	12.04	24.84	0.969404
Zipp, Bettina	1972	TV 1883 Schriesheim	11.39	23.21	0.981474

## Sheet: 200-400
name, first name	year of birth	club	sec 200m	sec 400m	KsA
Andl, Gabi	1953	Karlsruher SC	24.74	55.44	0.892496
Angehrn, Isabelle	1978	LC Rothaus Breisgau	24.66	54.63	0.902801
Angerstein, Anke	1966	LG Karlsruhe	24.65	56.74	0.868876
Diel, Antje	1957	TV Lahr	24.29	56.24	0.863798
Düsseldorf, Sabine	1964	TV Konstanz	24.92	55.87	0.892071
Fahr, Annina	1993	TUS Gottmadingen	24.54	53.94	0.9099
Gonska, Nadine	1990	MTG Mannheim	22.79	52	0.876538
Grausam, Ute	1965	LC 80 Pforzheim	24.37	57.14	0.852993
Gröne, Jana	2000	MTG Mannheim	24.86	56.37	0.882029
Habermehl, Anette	1961	Karlsruher SC	24.04	56.64	0.84887
Heinz, Ulrike	1967	USC Freiburg	23.74	53.98	0.879585
Karck, Dagmar	1953	TB Emmendingen	24.84	53.9	0.921707
Kaufmann, Larissa	1985	LG Karlsruhe	24.74	56.1	0.881996
Kersten, Bettina	1965	TSG Wiesloch	24.26	53.19	0.912202
Klein, Ilona	1965	MTG Leasomed Mannheim	24.6	55.72	0.882986
Kohler, Ingrid	1961	LG Offenburg	24.42	56.94	0.857745
Krämer, Sarah	1996	SG Walldorf Astoria 1902	24.62	55.3	0.890416
Lehmann, Karin	1962	TV Konstanz	23.71	54.22	0.874585
Leistenschneider, Nicole	1967	MTG Mannheim	24.06	52.67	0.913613
Lippe, Gabi	1967	MTG Leasomed Mannheim	23.97	55.74	0.860065
Mergenthaler, Hannah	1997	MTG Mannheim	24.06	52.83	0.910846
Moll, Cornelia	1982	LG Region Karlsruhe	24.3	54.58	0.890436
Müller-Foell, Julia	1989	MTG Mannheim	24.54	54.57	0.899395
Onyambu, Elisabeth	1967	USC Heidelberg	24.68	53.7	0.919181
Precker, Anke	1965	LC Neckar Odenwald	24.59	54.3	0.905709
Schulte, Verena	1967	MTG Leasomed Mannheim	24.28	56	0.867143
Seer, Tamara	1989	MTG Mannheim	23.99	54.49	0.880529
Sommer, Sophia	1995	TV Bahlingen	24.47	53.17	0.920444
Stadelbacher, Judith	1992	LG Offenburg	24.91	55.94	0.890597
Steimle, Silvia	1973	LG Offenburg	24.62	53.82	0.914902
Tritschler, Christa	1963	TV Neustadt	24.54	56.63	0.866678
Wahl, Christine	1967	USC Heidelberg	23.73	52.92	0.896825
Wallmann, Katrin	1998	MTG Mannheim	24.1	55.76	0.864419
Wilmsmeyer, Sonja	1975	USC Freiburg	24.54	53.35	0.919963
Zinth, Doris	1957	LG Offenburg	24.84	55.28	0.898698

## Sheet: 400-800
name, first name	year of birth	club	sec 400m	sec 800m	KsA
Bakker, Julia	1994	LC Breisgau	56.49	133.73	0.844837
Braun, Susanne	1960	TV Konstanz	56.34	130.09	0.86617
Dold, Gabi	1969	SV Schopfheim	56.77	131.57	0.862963
Duda, Evelyn	1953	LG Coop Kurpfalz	56.24	128.48	0.875467
Düsseldorf, Sabine	1964	TV Konstanz	55.87	133.79	0.835189
Fischer, Ute	1956	DJK Villingen	55.74	124.9	0.892554
Folkerts, Meike	1985	LG Baar	56.68	130.55	0.868326
Frey, Christiane	1961	TV Helmsheim	56.76	130.4	0.870552
Galitschke, Eva	1974	Rastatter TV	55.88	128.64	0.868781
Gärtner, Katrin	1962	MTV Karlsruhe	54.44	129.2	0.842724
Garz, Johanna	1984	StTV Singen	56.43	133.14	0.847679
Gauch, Iris	1967	TSG Wiesloch	55.45	132.7	0.83572
Grimm, Heike	1973	TSG 1862 Weinheim	56.83	129.81	0.875587
Gutwein, Beate	1960	TV Staufen	55.44	123.05	0.901097
Hoffmann, Marliese	1942	LG Mannheim	56.7	128.8	0.880435
Höfler, Petra	1966	TV Konstanz	55.81	124.7	0.895108
Hoppe, Liesa Katharina	1990	LG Karlsruhe	56.65	133.43	0.849134
Jooß, Verena	1979	Ettlinger SV	55.5	127.34	0.871682
Kadletz, Birgit	1965	TV Konstanz	55.75	132.73	0.840051
Kallabis, Jolanda	2005	FT 1844 Freiburg	56.74	125.75	0.902425
Karcher, Christine	1961	LG Ortenau Nord	55.05	126.85	0.867954
Karck, Dagmar	1953	TB Emmendingen	53.9	128.36	0.839825
Klaus, Jutta	1953	LC/USC Freiburg	56.13	126.1	0.890246
Leistenschneider, Nicole	1967	MTG Mannheim	52.67	127.36	0.827104
Muck, Martina	1967	USC Heidelberg	55.33	123.16	0.898506
Onyambu, Elisabeth	1967	USC Heidelberg	53.7	123.25	0.8714
Panter, Viktoria	1959	TV Oberkirch	56.64	133.9	0.846004
Reinert, Jana	1998	SV 1899 Langensteinbach	54.69	124.67	0.877356
Schöne, Elisa	1987	TV Lahr	55.35	130.83	0.846136
Schulz, Bärbel	1968	LG Hardt	57.04	134.02	0.851216
Schumacher, Anna	1998	LG Kurpfalz	56.65	130.26	0.869799
Seer, Tamara	1989	MTG Mannheim	54.49	131.85	0.826545
Sommer, Sophia	1995	TV Bahlingen	53.17	127.53	0.833843
Stickel, Christine	1962	TV 34 Pforzheim	54.92	132.8	0.827108
Stillger, Carola	1958	TV Bad Rappenau	55.23	127.5	0.866353
Walter, Carolin	1988	LG Karlsruhe	53.96	124.22	0.868781
Zehnle, Patricia	1964	TV Lahr	56.87	132.12	0.860884
Zinth, Doris	1957	LG Offenburg	55.28	132.3	0.835676

## Sheet: 800-1500
name, first name	year of birth	club	sec 800m	sec 1500m	KsA
Amrhein, Fabienne	1992	MTG Mannheim	131.12	269.04	0.913805
Beck, Ulrike	1961	TV Konstanz	129.59	257.43	0.943873
Braun, Susanne	1960	TV Konstanz	130.09	280.96	0.868162
Flügel, Monika	1958	TV Staufen	133.76	277	0.905415
Friedmann, Ursula	1971	LG Offenburg	124.06	250.81	0.927445
Gutwein, Beate	1960	LC/USC Heidelberg	123.05	264.22	0.873207
Haisch, Adeline	2000	LG Region Karlsruhe	128.66	272.18	0.886316
Hegmann, Carmen	1970	SC Freudenberg	132.96	270.01	0.923299
Hettich, Sarah	1991	LG Karlsruhe	131.14	269.37	0.912824
Hoffmann, Marliese	1942	Post SG Mannheim	128.8	268.7	0.898772
Höfler, Petra	1966	TV Konstanz	124.7	267.96	0.872565
Huck, Inge	1955	LG LuK Steinbach-Bühl	132.4	268.7	0.923893
Kallabis, Jolanda	2005	FT 1844 Freiburg	125.75	261.44	0.901856
Kieninger, Renate	1954	LG Offenburg	132.8	265.4	0.938206
Klaus, Jutta	1953	LC/USC Freiburg	126.1	261.8	0.903123
Köninger, Sabine	1963	LG Ortenau Nord	128.9	269.7	0.896135
Leiberich, Marion	1988	Karlsruher SC	133.86	280.92	0.893448
Löffler, Sabine	1968	VfB Gaggenau	131.37	275.82	0.893042
Merkel, Lisa	2003	LG Region Karlsruhe	132.95	264.49	0.942498
Metzler, Verena	1973	LG Hegau-Bodensee	131.62	280.56	0.879625
Moh, Susanne	1959	USC Heidelberg	131.4	269.1	0.915552
Muck, Martina	1967	USC Heidelberg	123.16	269.09	0.85817
Müller, Ester	1992	TS Ottersdorf	129.13	276.41	0.875941
Müller, Felizitas	1992	TS Ottersdorf	129.42	274.4	0.884339
Müller, Irmgard	1950	SV Schapach	133.7	274.8	0.912254
Onyambu, Elisabeth	1967	USC Heidelberg	123.25	275.31	0.839395
Pfüller, Antje	2002	LG Region Karlsruhe	128.64	258.81	0.931958
Reinert, Jana	1998	LG Region Karlsruhe	124.67	258.04	0.905892
Roelssen, Brigitte	1949	USC Heidelberg	132.1	275.6	0.898721
Rosenplänter, Katja	1981	LC Rothaus Breisgau	128.11	260.96	0.920472
Rottmüller, Anita	1942	Post SG Mannheim	125.4	267	0.880618
Salt, Christa	1964	Karlsruher SC	131.38	276.08	0.892269
Schmälzle, Alica	1993	LG Ortenau Nord	126.77	272.74	0.871503
Schneider, Barbara	1965	TB Emmendingen	130.88	275.8	0.889775
Schwede, Lara-Ann	1996	PTSV Jahn Freiburg	129.25	270.86	0.89472
Seiter, Sophia	2003	LG Region Karlsruhe	131.3	276.78	0.88947
Seith, Bettina	1964	LG Karlsruhe	131.07	265.53	0.925531
Stocker, Tamara	1990	TG Stockach	133.53	275.24	0.909638
Vetter, Heidrun	1961	TuS Neureut	129.5	260.29	0.932854
Walton, Vanessa	1989	TV 1892 Tiefenbronn	132.95	277.72	0.897599
Wolfsperger, Christine	1967	TV Lahr	131.61	273.11	0.903551
Zimmer, Anne	1982	LG Ortenau Nord	131.19	271.14	0.907211
Zöller, Sabine	1960	TSG Akus Weinheim	131.9	280.2	0.882628

## Sheet: 1500-3000
name, first name	year of birth	club	sec 1500m	sec 3000m	KsA
Abel, Svenja	1983	TV Lahr	269.48	567.91	0.949024
Amrhein, Fabienne	1992	MTG Mannheim	269.04	571.95	0.940782
Beck, Ulrike	1961	TV Konstanz	257.43	537.95	0.957078
Bor, Viola	1979	LG USC Heidelberg	264.91	565.97	0.936127
Braun, Jutta	1956	TV 1893 Rheinau	279.39	587.8	0.950629
Breyer, Marie-Fee	1997	TV Munzingen	271.54	611.23	0.888504
Byrd, Andreina	1978	MTG Mannheim	270.26	583.67	0.926071
Chrzanowski, Elvira	1951	StTV Singen	263.7	582.6	0.905252
da Fonseca-Wollheim, Kristina	1972	LG Offenburg	249.85	558.05	0.895439
Edmeier, Andrea	1982	TV Rheinfelden	275.6	592.96	0.929574
Fischer, Tanja	1966	TV Staufen	268.37	583.7	0.919548
Flacke, Johanna	1998	LG Region Karlsruhe	278.22	590.57	0.942208
Friedmann, Ursula	1971	LG Offenburg	250.81	582.17	0.861638
Gruben, Lara	1990	MTG Mannheim	270.04	595.23	0.907347
Grüner, Olivia	1969	LT Radolfzell	278.8	587.64	0.94888
Gutwein, Beate	1960	MTG Laesomed Mannheim	264.22	590.5	0.894903
Häring, Sibylle	2000	LG Region Karlsruhe	268.72	575.24	0.934288
Hegmann, Carmen	1970	SC Freudenberg	270.01	568.09	0.950589
Hettich, Sarah	1991	LG Region Karlsruhe	269.37	594.2	0.906664
Hoss, Hanna	1994	LC Rothaus Breisgau	273.39	596.48	0.916678
Kallabis, Jolanda	2005	FT 1844 Freiburg	261.44	582.58	0.897525
Kieninger, Renate	1954	LG Offenburg	265.4	562.8	0.943141
Klaus, Jutta	1953	LC/USC Freiburg	261.8	593.2	0.88267
Knirsch, Lena	1996	LG Region Karlsruhe	278.44	606.83	0.917687
Knörr, Laura	1992	TV Konstanz	273.14	600.32	0.909981
Koßmann, Alicia	1998	SG Leutershausen	277.75	598.65	0.927921
Lang, Carolin	1986	LC Rothaus Breisgau	268.82	576.72	0.932237
Lenz, Claudia	1966	TV Konstanz	263.5	563.65	0.934977
Löffler, Sabine	1968	LG Hardt	275.82	596.09	0.925431
Mannsdörfer, Katrin	1986	LC 80 Pforzheim	273.11	607.64	0.89892
Mensing, Felicitas	1984	LV Biet	275.12	596.37	0.922649
Merkel, Lisa	2003	LG Region Karlsruhe	264.49	560	0.944607
Moh, Susanne	1959	USC Heidelberg	269.1	611.6	0.879987
Östringer, Maren	1974	TSG Wiesloch	276.34	583.39	0.947359
Ott, Ulrike	1961	TV Konstanz	277.81	606.69	0.915822
Pfüller, Antje	2002	LG Region Karlsruhe	258.81	583.99	0.886351
Raupp, Simone	1976	LG Karlsruhe	264.49	585.28	0.903807
Rosenplänter, Katja	1981	LC Rothaus Breisgau	260.96	577.09	0.9044
Roßkopf, Ute	1961	TV Konstanz	279.75	609.6	0.917815
Rußhardt, Katja	1964	TV Staufen	277.8	591.3	0.939625
Schaubhut, Anja	1980	Freiburger FC	280.67	590.78	0.950168
Seith, Bettina	1964	LG Karlsruhe	265.53	567.05	0.936531
Steinmetz, Katja	1966	LG Mannheim-Friedrichsfeld	274.66	572.11	0.960165
Stocker, Tamara	1990	TG Stockach	275.24	608.28	0.904978
Svensson, Amelie	1996	LG Region Karlsruhe	268.67	585.57	0.917636
Tränkle, Melina	1992	LG Region Karlsruhe	276.65	585.18	0.945521
Tremmel, Tina	1981	MTG Mannheim	272.81	593.07	0.919993
Vetter, Heidrun	1961	LG Karlsruhe	260.29	567.2	0.917807
Wagner, Sabrina	1988	LG Offenburg	279.07	593.21	0.940881
Walter, Ingrid	1949	WG Schönau-Todtnau	273.6	612.4	0.893534
Weber, Melanie	1973	LG Coop Kurpfalz	277.49	603.1	0.920212
Weber, Sabine	1956	USC Heidelberg	279.2	594.2	0.939751
Willaredt, Andrea	1964	TV Herbolzheim	274.8	599.75	0.916382
Wolfsperger, Christine	1967	TV Lahr	273.11	582.34	0.937974
Ziegler, Lisa	1994	TV 1847 Bühl	279.43	611.85	0.913394

## Sheet: 3000-5000
name, first name	year of birth	club	sec 3000m	sec 5000m	KsA
Abel, Svenja	1983	TV Lahr	567.91	986.2	0.959761
Ali, Rubina	1978	LG Hardt	610.9	1072.63	0.949224
Ambrosy, Sonja	1970	LC Breisgau	591.91	1036	0.952236
Amrhein, Fabienne	1992	MTG Mannheim	571.95	972.39	0.980317
Antoni, Sharon	1995	ETSV Lauda	610.87	1083.9	0.939309
Beck, Ulrike	1961	TV Konstanz	537.95	957.52	0.93636
Benz, Marion	1970	TB Emmendingen	614.57	1061.2	0.965212
Bor, Viola	1970	LG USC Heidelberg	565.97	1009.2	0.934684
Braun, Jutta	1956	TV 1893 Rheinau	587.8	1025.4	0.9554
Brod, Jutta	1973	TV Konstanz	598.32	1012.54	0.98485
Byrd, Andreina	1978	MTG Mannheim	583.67	1006.62	0.966386
Edmeier, Andrea	1982	TV Rheinfelden	592.96	1036.03	0.953898
Falkenberg, Anja	1969	LSG Karlsruhe	601.38	1046.12	0.958112
Flacke, Johanna	1998	LG Region Karlsruhe	590.57	1042.89	0.943804
Grüner, Olivia	1969	LT Radolfszell	587.64	1002.41	0.977045
Hahner, Anna	1989	RUN2SKY.com	578.8	967.33	0.997247
Hahner, Lisa	1989	RUN2SKY.com	558.42	949.83	0.97986
Hegmann, Carmen	1970	SC Freudenberg	568.09	1007.45	0.939815
Hellmann, Tanja	1992	LG Region Karlsruhe	607.44	1078.44	0.938763
Hettich, Sarah	1991	LG Region Karlsruhe	594.2	1070.19	0.925381
Hoeltz, Ulrike	1961	LSG Karlsruhe	606.34	1048.02	0.964263
Hoss, Hanna	1994	LC Rothaus Breisgau	596.48	1068.8	0.93014
Huber, Gertrud	1954	TuS Neureut	593.7	1042.4	0.949252
Hüttner, Inge	1943	TV 1893 Rheinau	608.3	1064.9	0.952046
Kaiser, Sophia	1996	LG Region Karlsruhe	589	1047.53	0.937125
Kieninger, Renate	1954	LG Offenburg	562.8	979.1	0.958023
Kirschke-Deck, Viola	1967	TSG 78 Heidelberg	599.34	1059.24	0.943035
Knirsch, Lena	1996	LG Region Karlsruhe	606.83	1079.47	0.936926
Knörr, Laura	1992	TV Konstanz	600.32	1068.69	0.936224
Krischke, Johanna	1997	LG Region Karlsruhe	607.86	1099.19	0.921679
Lang, Carolin	1986	LC Rothaus Breisgau	576.72	1006.43	0.955059
Löffler, Sabine	1968	LG Hardt	596.09	1038.6	0.95656
Mannsdörfer, Katrin	1986	LC 80 Pforzheim	607.64	1061.19	0.954337
Mensing, Felicitas	1984	LV Biet	596.37	1050.3	0.946349
Moser, Valerie	1998	Running Team Ortenau	593.71	1057.52	0.935695
Müller, Larissa	1992	MTG Mannheim	614.61	1089.59	0.940124
Östringer, Maren	1974	TSG Wiesloch	583.39	977.03	0.995176
Ott, Ulrike	1961	TV Konstanz	606.69	1073.82	0.941638
Raupp, Simone	1976	LG Karlsruhe	585.28	1033.5	0.943848
Röhrnbacher, Inge	1947	LSG Karlsruhe	607.2	1037.8	0.97514
Rußhardt, Katja	1964	TV Staufen	591.3	1076.9	0.915127
Schaubhut, Anja	1980	Freiburger FC	590.78	1036.03	0.950391
Schleifer, Christine	1983	LV Biet	606.68	1041.92	0.970452
Schlosser, Doris	1944	LG Coop Kurpfalz	591.6	1023	0.963832
Schmitt, Brigitte	1946	VfL Mosbach-Elzach	593	1036.8	0.953254
Seith, Bettina	1964	LG Karlsruhe	567.05	1027.51	0.91978
Steiger, Karin	1974	LC Breisgau	613.83	1044.15	0.979792
Steinmetz, Katja	1966	USC Heidelberg	572.11	1037.64	0.918928
Sülzle, Anja	1971	LC 80 Pforzheim	608	1044.69	0.969985
Svensson, Amelie	1996	LG Region Karlsruhe	585.57	1078.93	0.904554
Tremmel, Tina	1981	MTG Mannheim	593.07	1013.77	0.975024
Wagner, Sabrina	1988	LG Offenburg	593.21	1026.17	0.963469
Willaredt, Andrea	1964	TV Herbolzheim	599.75	1099	0.909539
Wolf, Ursula	1963	TV 1893 Rheinau	605.63	1034.6	0.975627
Wolfsperger, Christine	1967	TV Lahr	582.34	1052	0.922592
Zentner, Lidia	1953	Gazelle Pforzheim/Königsbach	609.01	1042.8	0.973357
Ziegler, Lisa	1994	TV 1847 Bühl	611.85	1003.83	1.01586
Zipse, Manuela	1974	LC Rothaus Breisgau	588.31	995.88	0.984573

## Sheet: 5000-10000
name, first name	year of birth	club	sec 5000m	sec 10,000m	KsA
Abel, Svenja	1983	TV Lahr	986.2	2077.45	0.949433
Ambrosy, Sonja	1970	LC Breisgau	1036	2156.9	0.960638
Amrhein, Fabienne	1992	MTG Mannheim	972.39	2026.14	0.959845
Benz, Marion	1970	TB Emmendingen	1061.2	2247.08	0.944515
Braun, Jutta	1956	TV 1893 Rheinau	1025.4	2144.5	0.956307
Brod, Jutta	1973	TV Konstanz	1012.54	2137.43	0.947437
Byrd, Andreina	1978	MTG Mannheim	1006.62	2105.92	0.955991
Dieterich, Dr. Heike	1958	LC Marathon Rheinfelden	1076.08	2264.02	0.950592
Echle, Verena	1984	TV Biberach	1052.31	2194.58	0.959008
Falkenberg, Anja	1969	LSG Karlsruhe	1046.12	2274.1	0.92003
Grüner, Annemarie	1940	LT Radolfzell	1061.24	2201.04	0.964308
Grüner, Olivia	1969	LT Radolfzell	1002.41	2067.32	0.969768
Haas, Marilyne	1990	TV Biberach	1093.64	2422.9	0.902753
Hahner, Anna	1989	RUN2SKY.com	967.33	2125.61	0.910167
Hahner, Lisa	1989	RUN2SKY.com	949.83	2018.49	0.941129
Hettler, Ria	1952	DJK Mannheim	1091.1	2289.9	0.952967
Hoeltz, Ulrike	1961	LSG Karlsruhe	1048.02	2173.27	0.964464
Huber, Gertrud	1954	TuS Neureut	1042.4	2200.8	0.947292
Hüttner, Inge	1953	TV 1893 Rheinau	1064.9	2198.5	0.968751
Imgraben, Monika	1959	LC Breisgau	1067.27	2269.14	0.940682
Jesberger, Heidi	1977	TSV Assamstadt	1068.3	2235.78	0.95564
Kaiser, Sophia	1996	LG Region Karlsruhe	1047.53	2205.92	0.949744
Kieninger, Renate	1954	LG Offenburg	979.1	2323.2	0.842889
Löffler, Sabine	1968	LG Hardt	1038.6	2210.94	0.93951
Müller, Larissa	1992	MTG Mannheim	1089.59	2449.35	0.889697
Östringer, Maren	1974	TSG Wiesloch	977.03	2022.62	0.966103
Röhrnbacher, Inge	1947	ESG Frankonia Karlsruhe	1037.8	2180	0.95211
Schleifer, Christine	1983	LV Biet	1041.92	2161.6	0.964027
Schlosser, Doris	1944	LG Coop Kurpfalz	1023	2136.3	0.957731
Schmider, Ursula	1970	TV Biberach	1095.9	2468	0.888088
Schmitt, Brigitte	1946	VfL Mosbach-Elzach	1036.8	2153.3	0.962987
Seith, Bettina	1964	LG Karlsruhe	1027.51	2202.3	0.933124
Steiger, Karin	1974	LC Breisgau	1044.15	2214.6	0.942969
Sülzle, Anja	1971	LC 80 Pforzheim	1044.69	2256.6	0.925897
Utz, Verena	1984	TV Biberach	1073.33	2204.89	0.973591
Wagner, Constanze	1963	TV 1893 Rheinau	1091.7	2254.2	0.968592
Wagner, Sabrina	1988	LG Offenburg	1026.17	2198.06	0.933705
Wolf, Ursula	1963	TV 1893 Rheinau	1034.6	2147.6	0.963494
Zentner, Lidia	1953	Gazelle Pforzheim/Königsbach	1042.8	2195	0.950159
Zink, Birgit	1957	Gazelle Pforzheim/Königsbach	1102.23	2282.35	0.965873
Zipse, Manuela	1974	LC Rothaus Breisgau	995.88	2239.11	0.889532
