# Supplementary material for: Sex-specific characteristics of special endurance and performance potential in female runners
Source: BMC Res Notes. 2025 Apr 26;18:196. doi: 10.1186/s13104-025-07256-6 (PMC12032771; doi:10.1186/s13104-025-07256-6)
Supplement: Supplementary file 14 — Supplementary Material 14 [file 13104_2025_7256_MOESM14_ESM.xlsx]

## Sheet: 100-200
name, first name	date or year of birth	nation or club	sec 100m	sec 200m	KsA
GRIFFITH-JOYNER Florence	21 DEC 1959	USAUSA	10.49	21.34	0.98313
THOMPSON-HERAH Elaine	28 JUN 1992	JAMJAM	10.54	21.53	0.979099
FRASER-PRYCE Shelly-Ann	27 DEC 1986	JAMJAM	10.6	21.79	0.972923
JETER Carmelita	24 NOV 1979	USAUSA	10.64	22.11	0.96246
JACKSON Shericka	16 JUL 1994	JAMJAM	10.65	21.45	0.993007
JONES Marion	12 OCT 1975	USAUSA	10.65	21.62	0.985199
RICHARDSON Sha'Carri	25 MAR 2000	USAUSA	10.71	21.94	0.976299
TA LOU Marie-Josée	18 NOV 1988	CIVCIV	10.72	22.08	0.971014
ARRON Christine	13 SEP 1973	FRAFRA	10.73	22.26	0.964061
OTTEY Merlene	10 MAY 1960	JAMJAM	10.74	21.64	0.992606
STEWART Kerron	16 APR 1984	JAMJAM	10.75	21.99	0.977717
ASHFORD Evelyn	15 APR 1957	USAUSA	10.76	21.83	0.985799
CAMPBELL-BROWN Veronica	15 MAY 1982	JAMJAM	10.76	21.74	0.98988
LALOVA-COLLIO Ivet	18 MAY 1984	BULBUL	10.77	22.32	0.965054
PRIVALOVA Irina	22 NOV 1968	RUSRUS	10.77	21.87	0.984911
AHOURÉ Murielle	23 AUG 1987	CIVCIV	10.78	22.24	0.969424
BOWIE Tori	27 AUG 1990	USAUSA	10.78	21.77	0.990354
EDWARDS Torri	31 JAN 1977	USAUSA	10.78	22.28	0.967684
SOWELL Dawn	27 MAR 1966	USAUSA	10.78	22.04	0.978221
LI Xuemei	05 JAN 1977	CHNCHN	10.79	22.01	0.980463
MILLER Inger	12 JUN 1972	USAUSA	10.79	21.77	0.991272
OKAGBARE Blessing	09 OCT 1988	NGRNGR	10.79	22.04	0.979129
GÖHR Marlies	21 MAR 1958	GDRGDR	10.81	21.74	0.99448
SCHIPPERS Dafne	15 JUN 1992	NEDNED	10.81	21.63	0.999538
ALFRED Julien	10 JUN 2001	LCALCA	10.81	21.91	0.986764
AHYE Michelle-Lee	10 APR 1992	TTOTTO	10.82	22.25	0.972584
JEFFERSON Melissa	21 FEB 2001	USAUSA	10.82	22.46	0.963491
SIMPSON Sherone	12 AUG 1984	JAMJAM	10.82	22	0.983636
TERRY Twanisha	24 JAN 1999	USAUSA	10.82	22.17	0.976094
TORRENCE Gwen	12 JUN 1965	USAUSA	10.82	21.72	0.996317
ASHER-SMITH Dina	04 DEC 1995	GBRGBR	10.83	21.88	0.989945
KOCH Marita	18 FEB 1957	GDRGDR	10.83	21.71	0.997697
CUTHBERT Juliet	09 APR 1964	JAMJAM	10.83	21.75	0.995862
DANIELS Teahna	25 MAR 1997	USAUSA	10.83	22.51	0.962239
DAVIS Tamari	15 FEB 2003	USAUSA	10.83	22.3	0.9713
STURRUP Chandra	12 SEP 1971	BAHBAH	10.84	22.33	0.970891
NUNEVA Anelia	30 JUN 1962	BULBUL	10.85	22.01	0.985915
LEE Muna	30 OCT 1981	USAUSA	10.85	22.01	0.985915
MÖLLER Silke	20 JUN 1964	GDRGDR	10.86	21.74	0.99908
HOOKER Marshevet	25 SEP 1984	USAUSA	10.86	22.34	0.972247
Gladisch Silke	1964	SC Empor Rostock	10.86	21.74	0.99908
FREEMAN Octavious	20 APR 1992	USAUSA	10.87	22.55	0.96408
STURGIS Cambrea	27 MAR 1999	USAUSA	10.87	22.11	0.983265
CLARK Tamara	09 JAN 1999	USAUSA	10.88	21.92	0.992701
WILLIAMS Lauryn	11 SEP 1983	USAUSA	10.88	22.27	0.977099
KAMBUNDJI Mujinga	17 JUN 1992	SUISUI	10.89	22.05	0.987755
KRABBE Katrin	22 NOV 1969	GDRGDR	10.89	21.95	0.992255
FELIX Allyson	18 NOV 1985	USAUSA	10.89	21.69	1.00415
JACKSON Shawnti	02 MAY 2005	USAUSA	10.89	22.48	0.968861
LIU Xiaomei	11 JAN 1972	CHNCHN	10.89	22.36	0.974061
NEITA Daryll	29 AUG 1996	GBRGBR	10.9	22.23	0.980657
BROWN Brittany	18 APR 1995	USAUSA	10.9	21.99	0.99136
DEL PONTE Ajla	15 JUL 1996	SUISUI	10.9	22.38	0.974084
SOLOMON Shalonda	19 DEC 1985	USAUSA	10.9	22.15	0.984199
STEINER Abby	24 NOV 1999	USAUSA	10.9	21.77	1.00138
DEL PONTE Ajla	15 JUL 1996	SUI SUI	10.9	22.38	0.974084
DRECHSLER Heike	16 DEC 1964	GDRGDR	10.91	21.71	1.00507
ANDERSON Alexandria	28 JAN 1987	USAUSA	10.91	22.58	0.966342
FERGUSON Debbie	16 JAN 1976	BAHBAH	10.91	22.19	0.983326
FYNES Savatheda	17 OCT 1974	BAHBAH	10.91	22.32	0.977599
BROWN Alice	20 SEP 1960	USAUSA	10.92	22.39	0.975435
COLLINS Shania	14 NOV 1996	USAUSA	10.92	22.45	0.972829
HILL D'Andre	19 APR 1973	USAUSA	10.92	22.49	0.971098
PRANDINI Jenna	20 NOV 1992	USAUSA	10.92	21.89	0.997716
STRACHAN Anthonique	22 AUG 1993	BAHBAH	10.92	22.15	0.986005
NESTSIARENKA Yulia	15 JUN 1979	BLR BLR	10.92	22.91	0.953296
KASPRZYK Ewa	07 SEP 1957	POLPOL	10.93	22.13	0.987799
OFILI Favour	31 DEC 2002	NGRNGR	10.93	21.96	0.995446
TARMOH Jeneba	27 SEP 1989	USAUSA	10.93	22.23	0.983356
CALVERT-POWELL Schillonie	27 JUL 1988	JAMJAM	10.94	22.55	0.970288
GUIDRY Carlette	04 SEP 1968	USAUSA	10.94	22.14	0.988257
WILLIAMS Briana	21 MAR 2002	JAMJAM	10.94	22.5	0.972444
LÜCKENKEMPER Gina	21 NOV 1996	GER GER	10.95	22.67	0.966034
WÖCKEL Bärbel	21 MAR 1955	GDRGDR	10.95	21.85	1.00229
AKINOSUN Morolake	17 MAY 1994	USAUSA	10.95	22.44	0.975936
BARBER Me'Lisa	04 OCT 1980	USAUSA	10.95	22.37	0.97899
DAVIS Kevona	20 DEC 2001	JAMJAM	10.95	22.26	0.983827
FACEY Simone	07 MAY 1985	JAMJAM	10.95	22.25	0.98427
WHITE Kayla	24 SEP 1996	USAUSA	10.95	22.01	0.995002
HURTIS Muriel	25 MAR 1979	FRAFRA	10.96	22.31	0.982519
MALCHUGINA Galina	17 DEC 1962	RUSRUS	10.96	22.18	0.988278
PÉREC Marie-José	09 MAY 1968	FRAFRA	10.96	21.99	0.996817
BRISCO Mikiah	14 JUL 1996	USAUSA	10.96	22.59	0.970341
DUNCAN Kimberlyn	02 AUG 1991	USAUSA	10.96	22.19	0.987832
HENDERSON Ashley	04 DEC 1995	USAUSA	10.96	22.49	0.974655
SCOTT Aurieyall	18 MAY 1992	USAUSA	10.96	22.46	0.975957
SEARS Jacious	14 AUG 2001	USAUSA	10.96	22.45	0.976392
COLANDER LaTasha	23 AUG 1976	USAUSA	10.97	22.34	0.982095
DAVIS-THOMPSON Pauline	09 JUL 1966	BAHBAH	10.97	22.27	0.985182
MBOMA Christine	22 MAY 2003	NAMNAM	10.97	21.78	1.00735
MOORE LaShauntea	31 JUL 1983	USAUSA	10.97	22.4	0.979464
NWOKOCHA Nzubechi Grace	07 APR 2001	NGRNGR	10.97	22.44	0.977718
ONYALI-OMAGBEMI Mary	03 FEB 1968	NGRNGR	10.97	22.07	0.99411
RICHARDS-ROSS Sanya	26 FEB 1985	USAUSA	10.97	22.09	0.99321
WHYTE Natalliah	09 AUG 1997	JAMJAM	10.97	22.39	0.979902
VORONOVA Natalya	09 JUL 1965	URSURS	10.98	22.35	0.98255
ZHIROVA Marina	06 JUN 1963	URSURS	10.98	22.46	0.977738
ABBA Ezinne	01 NOV 2000	USAUSA	10.98	22.47	0.977303
HILL Candace	11 FEB 1999	USAUSA	10.98	22.43	0.979046
MANI Léonie Myriam	21 MAY 1977	CMRCMR	10.98	22.41	0.97992
MILLER-UIBO Shaunae	15 APR 1994	BAHBAH	10.98	21.74	1.01012
BRISCO-HOOKS Valerie	06 JUL 1960	USAUSA	10.99	21.81	1.00779
BRYANT Dezerea	27 APR 1993	USAUSA	10.99	22.18	0.990983
CHANDLER Caisja	18 JUN 2000	USAUSA	10.99	22.37	0.982566
CHUKWUMA Rosemary	05 DEC 2001	NGRNGR	10.99	22.33	0.984326
CUNLIFFE Hannah	09 JAN 1996	USAUSA	10.99	22.49	0.977323
MCDONALD Beverly	15 FEB 1970	JAMJAM	10.99	22.22	0.989199
PINTO Tatjana	02 JUL 1992	GER GER	11	22.63	0.972161
LONG Mckenzie	11 JUL 2000	USAUSA	11	22.31	0.986105
MCGRONE Candyce	24 MAR 1989	USAUSA	11	22.01	0.999546
STEVENS Deajah	19 MAY 1995	USAUSA	11	22.09	0.995926
THOMAS Gabrielle	07 DEC 1996	USAUSA	11	21.6	1.01852
LANSIQUOT Imani	17 DEC 1997	GBR GBR	11.01	22.93	0.960314
RICHTER Annegret	13 OCT 1950	FRGFRG	11.01	22.39	0.983475
LEMOS Ana Claudia	06 NOV 1988	BRABRA	11.01	22.48	0.979537
MARSHALL Pam	16 AUG 1960	USAUSA	11.01	21.93	1.0041
WASHINGTON Arianna	04 SEP 1996	USAUSA	11.01	22.21	0.991445
ZAHI Carolle	12 JUN 1994	FRA FRA	11.01	22.85	0.963676
Burghardt Alexandra	1994	LG Gendorf Wacker Burghausen	11.01	23	0.957391
KONDRATYEVA Lyudmila	11 APR 1958	URSURS	11.02	22.31	0.987898
SCHNEIDER-MÜLLER Romy	26 JUL 1958	GDRGDR	11.02	22.47	0.980863
ATKINS Joanna	31 JAN 1989	USAUSA	11.02	22.27	0.989672
BLACKMON Kennedy	02 OCT 1999	USAUSA	11.02	22.52	0.978686
GAITHER TyNia	16 MAR 1993	BAHBAH	11.02	22.41	0.98349
HEMIDA Bassant	28 SEP 1996	EGYEGY	11.02	22.41	0.98349
JENKINS LaTasha	19 DEC 1977	USAUSA	11.02	22.29	0.988784
MASON Symone	31 AUG 1999	USAUSA	11.02	22.49	0.979991
MOODY Samirah	08 NOV 2002	USAUSA	11.02	22.5	0.979556
Müller Romy	1958	SC Dynamo Berlin	11.02	22.47	0.980863
HAMANN Monika	08 JUN 1954	GDR GDR	11.03	22.76	0.969244
SOUMARÉ Myriam	29 OCT 1986	FRAFRA	11.03	22.11	0.997739
DOWDIE Peta-Gaye	18 JAN 1977	JAMJAM	11.03	22.51	0.980009
HYCHE Holli	06 SEP 1971	USAUSA	11.03	22.34	0.987466
NKU Mercy	17 JUL 1976	NGRNGR	11.03	22.53	0.979139
ROSA Vitoria Cristina	12 JAN 1996	BRABRA	11.03	22.47	0.981753
AUERSWALD-LANGE Ingrid	02 SEP 1957	GDRGDR	11.04	22.6	0.976991
GEVAERT Kim	05 AUG 1978	BELBEL	11.04	22.2	0.994595
HELTEN Ingeborg	31 DEC 1950	FRG FRG	11.04	22.68	0.973545
NAIMOVA Tezdzhan	01 MAY 1987	BULBUL	11.04	22.43	0.984396
PASCHKE Melanie	29 JUN 1970	GERGER	11.04	22.45	0.983519
BAILEY Aleen	25 NOV 1980	JAMJAM	11.04	22.33	0.988804
JAYASINGHE Susanthika	17 DEC 1975	SRISRI	11.04	22.28	0.991023
BILY Laurence	05 MAY 1963	FRA FRA	11.04	22.9	0.964192
TSIMANOUSKAYA Krystsina	19 NOV 1996	BLR BLR	11.04	22.75	0.970549
Auerswald Ingrid	1957	SC Motor Jena	11.04	22.6	0.976991
BEHRENDT Kerstin	02 SEP 1967	GDRGDR	11.05	22.36	0.988372
PHILIPP Andrea	29 JUL 1971	GERGER	11.05	22.25	0.993258
SLYUSAR Irina	19 MAR 1963	UKRUKR	11.05	22.59	0.978309
BASS Gina	03 MAY 1995	GAMGAM	11.05	22.58	0.978742
BRAHE-PEDERSEN Mia	28 NOV 2005	USAUSA	11.05	22.58	0.978742
BURRELL-FINN Michelle	08 MAY 1965	USAUSA	11.05	22.39	0.987048
JOHNSON Kortnei	11 AUG 1997	USAUSA	11.05	22.56	0.97961
ODIONG Edidiong Ofinome	13 MAR 1997	BRNBRN	11.05	22.43	0.985288
VINOGRADOVA Natalya	28 FEB 1973	BLR BLR	11.05	22.68	0.974427
DOUGLAS Montell	24 JAN 1986	GBRGBR	11.05	23.34	0.946872
HAASE Rebekka	02 JAN 1993	GER GER	11.06	22.76	0.97188
HENRY Desiree	26 AUG 1995	GBRGBR	11.06	22.46	0.984862
MYERS Sandra	09 JAN 1961	ESPESP	11.06	22.38	0.988382
RYEMYEN Mariya	02 AUG 1987	UKRUKR	11.06	22.58	0.979628
TRANDENKOVA Marina	07 JAN 1967	RUSRUS	11.06	22.44	0.98574
ANNELUS Anglerne	10 JAN 1997	USAUSA	11.06	22.16	0.998195
DE KLERK Evette	21 AUG 1965	RSARSA	11.06	22.06	1.00272
MOORE Ashanti	07 NOV 2000	JAMJAM	11.06	22.49	0.983548
THOMAS Lanae-Tava	28 JAN 2001	USAUSA	11.06	22.38	0.988382
YOUNG-STONE Danette	06 OCT 1964	USAUSA	11.06	22.18	0.997295
STECHER Renate	12 MAY 1950	GDRGDR	11.07	22.38	0.989276
HACKETT Semoy	27 NOV 1988	TTOTTO	11.07	22.51	0.983563
JONES-FERRETTE LaVerne	16 SEP 1981	ISVISV	11.07	22.46	0.985752
KNIGHT Bianca	02 JAN 1989	USAUSA	11.07	22.35	0.990604
SEYNI Aminatou	24 OCT 1996	NIGNIG	11.07	21.98	1.00728
TAPLIN Cheryl	02 SEP 1972	USAUSA	11.07	22.59	0.98008
WILLIAMS Charonda	27 MAR 1987	USAUSA	11.07	22.32	0.991935
AZARASHVILI Maya	06 APR 1964	URSURS	11.08	22.24	0.996403
MOLOKOVA Marina	24 AUG 1962	URSURS	11.08	22.46	0.986643
POVH Olesya	18 OCT 1987	UKRUKR	11.08	22.58	0.981399
JACKSON Grace	14 JUN 1961	JAMJAM	11.08	21.72	1.02026
MOREHEAD Brenda	05 OCT 1957	USAUSA	11.08	22.38	0.99017
MOTHERSILL Cydonie	19 MAR 1978	CAYCAY	11.08	22.39	0.989728
TOWNSEND Tiffany	14 JUN 1989	USAUSA	11.08	22.26	0.995508
GEORGIEVA Nadezhda	02 SEP 1961	BULBUL	11.09	22.42	0.989295
KRATOCHVÍLOVÁ Jarmila	26 JAN 1951	TCHTCH	11.09	21.97	1.00956
DURST Stephanie	06 JAN 1982	USAUSA	11.09	22.48	0.986655
JONES Esther	07 APR 1969	USAUSA	11.09	22.47	0.987094
POHREBNIAK Natalia	19 FEB 1988	UKR UKR	11.09	22.64	0.979682
BESTUÉ Jaël	24 SEP 2000	ESPESP	11.1	22.54	0.984916
COOK Kathy	03 MAY 1960	GBRGBR	11.1	22.1	1.00452
SAMUEL Jamile	24 APR 1992	NEDNED	11.1	22.37	0.992401
TABAKOVA Yuliya	01 MAY 1980	RUSRUS	11.1	22.51	0.986228
WHITNEY Kaylin	09 MAR 1998	USAUSA	11.1	22.47	0.987984
BAZOLO Lorène Dorcas	04 MAY 1983	POR POR	11.1	22.64	0.980565
PHILIP Asha	25 OCT 1990	GBRGBR	11.1	23.45	0.946695
LOCKHOFF-SCHÖLZEL Bärbel	09 OCT 1959	GDR GDR	11.11	22.65	0.981015
MANG Véronique	15 DEC 1984	FRA FRA	11.11	22.92	0.969459
TURNER Laura	12 AUG 1982	GBRGBR	11.11	23.29	0.954058
BARBASHINA Elvira	25 FEB 1963	URS URS	11.12	22.27	0.998653
KOFFA Katerina	10 APR 1969	GRE GRE	11.12	22.67	0.981032
KOVTUN Natalya	27 MAY 1964	URS URS	11.12	22.69	0.980167
MAYER Lisa	02 MAY 1996	GER GER	11.12	22.64	0.982332
PENDAREVA Petya	20 JAN 1971	BUL BUL	11.12	22.78	0.976295
PUKHA Irina	10 JAN 1973	UKR UKR	11.12	22.6	0.984071
BREUER Grit	16 FEB 1972	GDR GDR	11.13	22.45	0.991537
WALTHER Gesine	06 OCT 1962	GDR GDR	11.13	22.24	1.0009
GONCHARENKO Svetlana	28 MAY 1971	RUS RUS	11.13	22.46	0.991095
GUSHCHINA Yuliya	04 MAR 1983	RUS RUS	11.13	22.53	0.988016
LESHCHOVA-GRIGORYEVA Yekaterina	21 APR 1974	RUS RUS	11.13	22.47	0.990654
MARJAMAA Helinä	05 JUN 1956	FIN FIN	11.13	22.94	0.970357
SZEWIŃSKA Irena	24 MAY 1946	POL POL	11.13	22.21	1.00225
VAN HUNENSTIJN Marije	02 MAR 1995	NED NED	11.13	22.89	0.972477
BOCHINA Natalya	04 JAN 1962	URS URS	11.14	22.19	1.00406
LEVORATO Manuela	16 MAR 1977	ITA ITA	11.14	22.6	0.985841
TAKÁCS Boglárka	28 AUG 2001	HUN HUN	11.14	22.77	0.97848
KWAKYE Jeanette	20 MAR 1983	GBRGBR	11.14	23.11	0.964085
DUNN-THOMAS Paula	03 DEC 1964	GBR GBR	11.15	22.69	0.982812
GAUGEL Heidi-Elke	11 JUL 1959	FRG FRG	11.15	22.56	0.988475
FÉLIX Sylviane	31 OCT 1977	FRA FRA	11.15	22.56	0.988475
MAKARENKO Kristina	28 FEB 1997	RUS RUS	11.15	22.79	0.978499
MAYR-KRIFKA Karin	04 JUN 1971	AUT AUT	11.15	22.7	0.982379
MÜLLER Laura	11 DEC 1995	GER GER	11.15	22.65	0.984547
RÉGA Chantal	07 AUG 1955	FRA FRA	11.15	22.72	0.981514
SARVARI Ulrike	22 JUN 1964	FRG FRG	11.16	22.88	0.975524
SCHIELKE Sina	19 MAY 1981	GER GER	11.16	22.78	0.979807
ALEKSEYEVA Tatyana	07 OCT 1963	URS URS	11.16	22.77	0.980237
BACOUL Rose-Aimée	09 JAN 1952	FRA FRA	11.16	22.53	0.990679
HAGLUND Linda	15 JUN 1956	SWE SWE	11.16	22.82	0.978089
KRAVCHENKO Anzhela	25 JAN 1971	UKR UKR	11.16	22.66	0.984996
AWUAH Kristal	07 AUG 1999	GBRGBR	11.16	23.05	0.96833
SAUNDERS Andrea	24 NOV 1952	GBRGBR	11.16	24.22	0.921552
KNOLL Silke-Beate	21 FEB 1967	GER GER	11.17	22.29	1.00224
OYEPITAN Abiodun	30 DEC 1979	GBR GBR	11.17	22.5	0.992889
WILLIAMS Bianca	18 DEC 1993	GBR GBR	11.17	22.58	0.989371
WILLIAMS Jodie	28 SEP 1993	GBR GBR	11.17	22.46	0.994657
ROCKMEIER Gabi	29 NOV 1973	GER GER	11.17	22.68	0.985009
VADER Els	24 SEP 1959	NED NED	11.17	22.81	0.979395
Cibis Anne	1985	MTG 1899 Mannheim	11.17	23.15	0.965011
Rockmeier Gabriele	1973	LG Olympia Dortmund	11.17	22.68	0.985009
Cibis, Anne	1985	MTG Mannheim	11.17	23.15	0.965011
BREHMER Christina	28 FEB 1958	GDR GDR	11.18	22.61	0.988943
ONUORA Anyika	28 OCT 1984	GBR GBR	11.18	22.64	0.987633
KHABAROVA Irina	18 MAR 1966	RUS RUS	11.18	22.34	1.0009
RUSAKOVA Natalya	12 DEC 1979	RUS RUS	11.18	22.42	0.997324
TOMCZAK Elżbieta	07 JAN 1961	POL POL	11.18	22.76	0.982425
Dietz Diana	1969	SC Magdeburg	11.18	23.18	0.964625
NELSON Ashleigh	20 FEB 1991	GBR GBR	11.19	22.85	0.979431
CHEBANU Olena	04 JAN 1981	UKR UKR	11.19	22.97	0.974314
GERMAN Natalya	10 NOV 1963	URS URS	11.19	22.47	0.995995
JANOTA Jolanta	06 JUL 1964	POL POL	11.19	22.9	0.977293
KWAYIE Lisa Marie	27 OCT 1996	GER GER	11.19	22.77	0.982872
PISIEWICZ Ewa	07 MAY 1962	POL POL	11.19	22.85	0.979431
PURSIAINEN Mona-Lisa	21 JUN 1951	FIN FIN	11.19	22.39	0.999553
RIEGER-GÜNTHER Sabine	06 NOV 1963	GDR GDR	11.19	22.36	1.00089
Blos Martina	1957	TSC Berlin	11.19	23.28	0.96134
Kwayie Lisa	1996	Neuköllner SF	11.19	22.77	0.982872
Montag Jennifer	1998	TSV Bayer 04 Leverkusen	11.19	23.5	0.95234
Rieger Sabine	1963	SC Motor Jena	11.19	22.37	1.00045
LANNAMAN Sonia	24 MAR 1956	GBR GBR	11.2	22.58	0.992028
OAKES Heather	14 AUG 1959	GBR GBR	11.2	22.92	0.977312
ATCHO Sarah	01 JUN 1995	SUI SUI	11.2	22.8	0.982456
BENTH Katia	16 NOV 1975	FRA FRA	11.2	22.87	0.979449
EFTIMOVA Inna	19 JUN 1988	BUL BUL	11.2	22.94	0.97646
KRUGLOVA Larisa	27 OCT 1972	RUS RUS	11.2	22.84	0.980736
STUY Hrystyna	03 FEB 1988	UKR UKR	11.2	22.66	0.988526
ZOLOTARYOVA Olga	01 NOV 1961	URS URS	11.2	22.8	0.982456
Nippgen Lisa	1997	MTG Mannheim	11.2	23.44	0.955631
Nippgen, Lisa	1997	MTG Mannheim	11.2	23.46	0.954817
AGYAPONG Finette	01 FEB 1997	GBR GBR	11.21	22.69	0.9881
BIKAR Alenka	07 JAN 1974	SLO SLO	11.21	22.76	0.985062
CHERVYAKOVA Svetlana	16 MAR 1963	URS URS	11.21	22.91	0.978612
EKK Oksana	26 NOV 1974	RUS RUS	11.21	22.69	0.9881
EMMANOUILIDOU Polyniki	30 JUN 2003	GRE GRE	11.21	22.85	0.981182
GEIPEL-SCHMIDT Ines	07 JUL 1960	GDR GDR	11.21	22.87	0.980324
PAPILINA Tatyana	14 JAN 1967	URS URS	11.21	22.89	0.979467
SIRAGUSA Irene	23 JUN 1993	ITA ITA	11.21	22.96	0.976481
ANIA Emma	07 FEB 1979	GBRGBR	11.21	23.25	0.964301
Mihambo, Malaika	1994	LG Kurpfalz	11.21	23.9	0.938075
BODENDORF Carla	13 AUG 1953	GDR GDR	11.22	22.64	0.991166
CALLENDER Bev	28 AUG 1956	GBR GBR	11.22	22.72	0.987676
DEMIROVA Yelizaveta	14 AUG 1987	RUS RUS	11.22	22.62	0.992042
KIEŁBASIŃSKA Anna	26 JUN 1990	POL POL	11.22	22.76	0.98594
MADUAKA Joice	30 SEP 1973	GBR GBR	11.23	22.83	0.983793
SIEMON Kirsten	19 APR 1961	GDR GDR	11.23	22.5	0.998222
CAZIER Marie-Christine	23 AUG 1963	FRA FRA	11.23	22.32	1.00627
IVANOVA Lilyana	17 MAR 1956	BUL BUL	11.23	22.73	0.988121
MASLAKOVA Lyudmila	26 JUL 1952	URS URS	11.23	22.62	0.992927
WALTER Annelies	06 DEC 1959	GDR GDR	11.23	22.77	0.986386
LICHTENHAGEN Silke	20 NOV 1973	GER GER	11.24	22.73	0.989001
GEORGIEVA Zlatka	20 JUL 1969	BUL BUL	11.24	22.94	0.979948
HANHIJOKI Sisko	25 APR 1962	FIN FIN	11.24	22.81	0.985533
HOOPER Gloria	03 MAR 1992	ITA ITA	11.24	22.89	0.982088
PASTUSHENKO Olena	14 JUL 1979	UKR UKR	11.24	22.85	0.983807
Kandarr Petra	1950	SC Chemie Halle	11.24	22.64	0.992933
Selmigkeit Doris	1952	SC Neubrandenburg	11.24	23.44	0.959044
Stropahl Ellen	1952	ASK Vorwärts Potsdam	11.24	22.73	0.989001
Wagner Marion	1978	USC Mainz	11.24	23.39	0.961094
MÖLLER Esther	13 SEP 1977	GER GER	11.25	22.81	0.986409
FOTOPOULOU Olivia	20 DEC 1996	CYP CYP	11.25	22.71	0.990753
BELKINA Olga	23 AUG 1990	RUS RUS	11.26	22.73	0.990761
KLEYANKINA-MARKINA Marina	19 MAR 1962	URS URS	11.26	22.92	0.982548
KOMISOVA Vera	11 JUN 1953	URS URS	11.26	22.96	0.980836
DONKOVA Yordanka	28 SEP 1961	BUL BUL	11.27	22.95	0.982135
MANNINEN Johanna	04 APR 1980	FIN FIN	11.27	22.93	0.982992
MIHALINEC Maja	17 DEC 1989	SLO SLO	11.27	22.78	0.989464
RYZHOVA Kseniya	19 APR 1987	RUS RUS	11.27	22.91	0.98385
DOUGLAS Stephanie	22 JAN 1969	GBRGBR	11.27	23.3	0.967382
PAPPS Sophie	06 OCT 1994	GBRGBR	11.27	23.3	0.967382
Kersten Annette	1967	SC Magdeburg	11.27	23.21	0.971133
ADEOYE Margaret	22 APR 1985	GBR GBR	11.28	22.88	0.986014
BOLINGO Cynthia	12 JAN 1993	BEL BEL	11.28	22.79	0.989908
FEDORIVA-SPAYER Aleksandra	13 SEP 1988	RUS RUS	11.28	22.19	1.01667
VINOGRADOVA-PETUSHINSKAYA Yelena	28 MAR 1964	RUS RUS	11.28	22.8	0.989474
Kaden Lilly	2001	LG Olympia Dortmund	11.28	23.21	0.971995
Lederer Amelie-Sophie	1994	LAC Quelle Fürth	11.28	23.43	0.962868
MASULLO Marisa	08 MAY 1959	ITA ITA	11.29	22.88	0.986888
RADECKA-PAKASZEWSKA Zuzanna	02 APR 1975	POL POL	11.29	22.96	0.983449
SLYUSSAR Antonina	19 MAR 1963	URS URS	11.29	22.97	0.983021
Matheis Lara	1992	TSG Gießen-Wieseck	11.29	23.13	0.976221
MORGENSTERN Heike	13 DEC 1962	GDR GDR	11.3	22.65	0.997792
TSCHIRCH Cathleen	23 JUL 1979	GER GER	11.3	22.97	0.983892
BOLSUN Yelena	25 JUN 1982	RUS RUS	11.3	22.64	0.998233
GACHEVSKA Monika	30 JAN 1974	BUL BUL	11.3	22.73	0.994281
JACQUES-SÉBASTIEN Lina	10 APR 1985	FRA FRA	11.3	22.59	1.00044
JARDIM Lucrécia	28 JAN 1971	POR POR	11.3	22.88	0.987762
KYLLÖNEN Sanna	09 MAR 1971	FIN FIN	11.3	22.98	0.983464
NASONKINA Olena	11 AUG 1962	URS URS	11.3	22.48	1.00534
PAVLOVA Pepa	1961	BUL BUL	11.3	22.68	0.996473
SALAHUB Natallia	31 MAR 1975	BLR BLR	11.3	22.82	0.990359
ŢIRLEA-MANOLACHE Ionela	09 FEB 1976	ROU ROU	11.3	22.35	1.01119
REES Alisha	16 APR 1999	GBRGBR	11.3	23.32	0.969125
Junk Sophia	1999	LG Rhein-Wied	11.3	22.87	0.988194
Schittenhelm Elfgard	1947	OSC Berlin	11.3	23.64	0.956007
Sommer Ulrike	1959	LAC Quelle Fürth	11.3	23	0.982609
Kwadwo, Yasmin	1990	MTG Mannheim	11.3	24.25	0.931959
BELL Alyson	09 NOV 2003	GBRGBR	11.31	23.93	0.945257
HOYTE Wendy	17 DEC 1957	GBRGBR	11.31	23.82	0.949622
HUNT Amy	15 MAY 2002	GBRGBR	11.31	22.42	1.00892
JACOBS Simmone Kim	05 SEP 1966	GBRGBR	11.31	22.95	0.985621
MILLS-JONES Hayley	14 SEP 1990	GBRGBR	11.31	23.29	0.971232
ANDERSON Shani	07 AUG 1975	GBRGBR	11.32	22.96	0.986063
BAPTISTE Joan	12 OCT 1959	GBRGBR	11.32	22.86	0.990376
BLOOMFIELD Christine	12 FEB 1968	GBRGBR	11.32	22.85	0.99081
UGEN Lorraine	22 AUG 1991	GBRGBR	11.32	23.81	0.950861
Zanke Doris	1958	ASK Vorwärts Potsdam	11.32	23.36	0.969178
Burghardt, Alexandra	1994	MTG Mannheim	11.32	23.57	0.960543
BRIER Hannah	03 FEB 1998	GBRGBR	11.33	23.29	0.97295
FREEMAN Emily	24 NOV 1980	GBRGBR	11.33	22.64	1.00088
SIBBONS Aleeya	05 NOV 2002	GBRGBR	11.33	23.82	0.951301
WEDDERBURN-GOODISON Nia	09 JAN 2005	GBRGBR	11.33	23.59	0.960577
Düring Jeanette	1965	SC Cottbus	11.33	23.16	0.978411
Elsler Josefina	1991	LC Paderborn	11.33	23.16	0.978411
Günther Leena	1991	LT DSHS Köln	11.33	23.64	0.958545
Kroniger Annegret	1952	USC Mainz	11.33	22.89	0.989952
Rockmeier Birgit	1973	LG Olympia Dortmund	11.33	22.9	0.98952
Möllinger, Anne	1985	MTG Mannheim	11.33	23.5	0.964255
DUBARRY-GAY Kiah	15 NOV 2001	GBRGBR	11.34	23.29	0.973809
FORRESTER Amanda	29 SEP 1978	GBRGBR	11.34	23.94	0.947368
MERRY Katharine	21 SEP 1974	GBRGBR	11.34	22.76	0.996485
Becker Gabriele	1975	LAZ Bruchköbel	11.34	23.63	0.959797
Maletzki Doris	1952	SC Dynamo Berlin	11.34	22.54	1.00621
Rabe Birgit	1960	SC Motor Jena	11.34	23.45	0.967164
Struppert Bärbel	1950	SC Motor Jena	11.34	23.64	0.959391
Thomas Andrea-Irmgard	1963	VfL Sindelfingen	11.34	22.74	0.997361
Walther Kerstin	1961	SC DHfK Leipzig	11.34	22.9	0.990393
Philipp, Andrea	1972	TV 1883 Schriesheim	11.34	23.45	0.967164
DANVILLE Sharon	22 APR 1955	GBRGBR	11.35	23.98	0.946622
OHURUOGU Christine	17 MAY 1984	GBRGBR	11.35	22.85	0.993435
RICHARDSON Marcia	10 FEB 1972	GBRGBR	11.35	23.53	0.964726
Derr Manuela	1971	SC Neubrandenburg	11.35	23.3	0.974249
Mickler Ingrid	1942	USC Mainz	11.35	23.54	0.964316
Weit Inna	1988	ART Düsseldorf	11.35	23.08	0.983536
JAMES Della	28 MAR 1949	GBRGBR	11.36	23.72	0.957841
LEWIS Annabelle	20 MAR 1989	GBRGBR	11.36	23.9	0.950628
MILLER Rachel	29 JAN 1990	GBRGBR	11.36	23.94	0.949039
Wakan Katja	1981	Hallesche LA-Freunde	11.37	23.78	0.956266
BAPTISTE Kimbely	27 DEC 1992	GBRGBR	11.38	23.34	0.97515
Eberding Karla	1959	SC Magdeburg	11.38	22.88	0.994755
Schwab Corinna	1999	LAC Erdgas Chemnitz	11.38	22.51	1.01111
ADAM Georgina	24 MAR 2000	GBRGBR	11.39	22.87	0.996065
EDUAN Success	27 SEP 2004	GBRGBR	11.39	23.2	0.981897
HUMPHREYS Corinne	07 NOV 1991	GBRGBR	11.39	24.03	0.947982
O'NEILL Elaine	20 AUG 1989	GBRGBR	11.39	23.58	0.966073
REGIS Renee	02 SEP 2005	GBRGBR	11.39	23.59	0.965663
Habel Katchi	1982	LG Olympia Dortmund	11.39	23.31	0.977263
Jacob Stefanie	1965	SC Motor Jena	11.39	23.75	0.959158
Richter Sabine	1966	Eintracht Frankfurt	11.39	23.68	0.961993
Zipp Bettina	1972	TV 1883 Schriesheim	11.39	23.21	0.981474
Zipp, Bettina	1972	TV 1883 Schriesheim	11.39	23.21	0.981474
JAMES Vernicha	06 JUN 1984	GBRGBR	11.4	22.93	0.994331
ALIU Immanuela	19 APR 2000	GBRGBR	11.41	23.44	0.973549
THOMAS Kadi-Ann	10 FEB 1986	GBRGBR	11.41	23.28	0.980241
Haack Christina Anne	1987	TV Gladbeck 1912	11.41	23.36	0.976884
Hirsch Monika	1959	USC Mainz	11.41	23.01	0.991743
Prepens Talea	2001	TV Cloppenburg	11.41	23.15	0.985745
Poßekel Elvira	1953	LG Bonn/Troisdorf	11.42	23.36	0.97774
ASHMEADE Leonie	26 JAN 2001	GBRGBR	11.43	24	0.9525
BLOOR Louise	21 SEP 1985	GBRGBR	11.43	23.31	0.980695
OFILI Cindy	05 AUG 1994	GBRGBR	11.43	23.46	0.974425
PEMBERTON Cassie-Ann	24 JUL 2001	GBRGBR	11.43	22.79	1.00307
TAGOE Annie	04 JUN 1993	GBRGBR	11.43	24.05	0.95052
Eidner Tiffany	1997	TC Bad Lobenstein	11.43	23.64	0.967005
Fehm Katrin	1998	SG Siemens Amberg	11.43	23.15	0.987473
Freese Anna-Lena	1994	FTSV Jahn Brinkum	11.43	23.08	0.990468
Gonska Nadine	1990	MTG 1899 Mannheim	11.43	22.79	1.00307
Grauvogel Louisa	1996	LG Saar 70	11.43	23.1	0.98961
Grompe Katharina	1993	LG Olympia Dortmund	11.43	23.53	0.971526
Köhler Karoline	1984	TV Wattenscheid 01	11.43	23.72	0.963744
Möller Sandra	1980	TV Wattenscheid 01	11.43	23.24	0.983649
Gonska, Nadine	1990	MTG Mannheim	11.43	22.79	1.00307
DAVIES Samantha	20 SEP 1979	GBRGBR	11.44	23.06	0.992194
ENDACOTT Katherine	29 JAN 1980	GBRGBR	11.44	23.56	0.971138
EZE Joy	31 MAY 2004	GBRGBR	11.44	23.61	0.969081
HYLTON Shannon	19 DEC 1996	GBRGBR	11.44	22.78	1.00439
WILHELMY Sarah	02 FEB 1980	GBRGBR	11.44	23.23	0.984933
Böhmer Marion	1958	SC Turbine Erfurt	11.44	22.88	1
Cremer Esther	1988	TV Wattenscheid 01	11.44	23.1	0.990476
Kaufer Evelin	1953	SC Einheit Dresden	11.44	23.64	0.967851
Klösters Sabine	1960	OSC Thier Dortmund	11.44	23.56	0.971138
Koppetsch Petra	1958	TSC Berlin	11.44	23.09	0.990905
Lippe, Gabi	1967	MTG Mannheim	11.44	23.97	0.954526
BARNETT Helen	13 MAY 1958	GBRGBR	11.45	23.14	0.989628
JOHNCOCK Rachel	04 OCT 1993	GBRGBR	11.45	23.74	0.964617
WALKER Diani	14 JUL 1995	GBRGBR	11.45	23.72	0.96543
Krause Christiane	1950	ASC Darmstadt	11.45	23.17	0.988347
Rosendahl Heidemarie	1947	TuS 04 Leverkusen	11.45	22.96	0.997387
DOBBIN Beth	07 JUN 1994	GBRGBR	11.46	22.5	1.01867
THOMPSON Shauna	08 APR 1992	GBRGBR	11.46	23.42	0.978651
Beck Ute	1965	SC Karl-Marx-Stadt	11.46	23.74	0.965459
Ghosh Shanta	1975	LC Rehlingen	11.46	22.8	1.00526
Paetz Sabine	1957	SC DHfK Leipzig	11.46	23.37	0.980745
Vollmer Elke-Maria	1961	OSC Thier Dortmund	11.46	23.45	0.977399
Savari, Ulrike	1964	USC Heidelberg	11.46	23.48	0.97615
MURPHY Catherine	21 SEP 1975	GBRGBR	11.48	23.28	0.986254
März Theresia	1960	MTV 1881 Ingolstadt	11.48	23.55	0.974947
ANNING Amber	18 NOV 2000	GBRGBR	11.49	23.31	0.985843
WILLIAMS Hannah	23 APR 1998	GBRGBR	11.49	23.38	0.982891
Braun Manuela	1966	SC Magdeburg	11.49	23.4	0.982051
Haggenmüller Angelika	1969	MTV 1879 München	11.49	23.29	0.98669
Schönmetzler Christina	1971	LAC Quelle Fürth/München	11.49	23.72	0.968803
Dalchow Monika	1958	SC Traktor Schwerin	11.5	23.34	0.985433
Gang Maren	1953	VfB Stuttgart 1893	11.5	23.18	0.992235
Watschke Corinna	1961	VfL Wolfsburg	11.5	23.8	0.966387
NIELSEN Laviai	13 MAR 1996	GBRGBR	11.51	23.81	0.966821
OXLEY Sarah	03 JUL 1973	GBRGBR	11.51	23.2	0.992241
WHITTAKER Sandra	29 JAN 1963	GBRGBR	11.51	22.98	1.00174
Fiebig Tamaris	1970	SC Chemie Halle	11.51	23.19	0.992669
Betz Bianca	1960	LG Bayer Leverkusen	11.52	23.39	0.985036
Dix Maike	1986	TV Wattenscheid 01	11.52	23.26	0.990542
Köninger Anke	1961	VfL Sindelfingen	11.52	23.55	0.978344
Neumann Doris	1955	SC Traktor Schwerin	11.52	23.44	0.982935
Schuster Claudia	1967	SC Karl-Marx-Stadt	11.52	23.35	0.986724
Sharp Petra	1954	LAC Quelle Fürth	11.52	23.54	0.97876
AKINBILEJE Faith	21 SEP 2005	GBRGBR	11.53	23.44	0.983788
CAMPSALL Rebecca	02 OCT 1990	GBRGBR	11.53	23.79	0.969315
FRASER Donna	07 NOV 1972	GBRGBR	11.53	23.05	1.00043
Theele Heike	1964	SC Magdeburg	11.53	23.7	0.972996
Lobe, Ricarda	1994	MTG Mannheim	11.53	23.87	0.966066
CLARK Zoey	25 OCT 1994	GBRGBR	11.54	23.36	0.988014
LONGDEN Hannah	04 DEC 2000	GBRGBR	11.54	23.69	0.974251
WRIGHT Eve	08 AUG 2002	GBRGBR	11.54	24.13	0.956486
Abt Gudrun Maria	1962	TSV Genkingen	11.54	23.37	0.987591
Arendt Helga	1964	Eintracht Hamm	11.54	23.13	0.997838
Balzer Karin	1938	SC Leipzig	11.54	23.64	0.976311
Braag Bettina	1965	LG Gevelsberg/Schwelm	11.54	23.7	0.97384
Feeder Christa	1952	VfL Wolfsburg	11.54	23.67	0.975074
Handt Angelika	1954	SC Einheit Dresden	11.54	23.45	0.984222
Haugrund Sabine	1960	SC Neubrandenburg	11.54	23.49	0.982546
Löwe Gabriele	1958	SC Einheit Dresden	11.54	23.1	0.999134
Peters Mareike	1986	TSV Bayer 04 Leverkusen	11.54	23.52	0.981293
Wilkes Birgit	1955	LG Bonn/Troisdorf	11.54	23.44	0.984642
Zehrt Monika	1952	SC Dynamo Berlin	11.54	23.04	1.00174
Morgenstern Ina	1968	SC Dynamo Berlin	11.55	23.66	0.976331
Schabinger Michaela	1961	MTV 1881 Ingolstadt	11.55	23.28	0.992268
Seidel Katja	1973	TV 1879 Hilpoltstein	11.55	23.65	0.976744
BURNSIDE-DEACON Susan	03 FEB 1980	GBRGBR	11.56	23.6	0.979661
PIPI Ama	26 NOV 1995	GBRGBR	11.56	22.95	1.00741
WHITLOCK Janine	11 AUG 1973	GBRGBR	11.56	23.3	0.992275
Beuster Carola	1963	SC Neubrandenburg	11.56	23.46	0.985507
Franzen Judith	1999	TSV Bayer o4 Leverkusen	11.56	23.37	0.989303
Hagen Andrea	1968	VfL Wolfsburg	11.56	23.59	0.980076
Lepping Claudia	1968	LG Marl-Bertlich	11.56	23.18	0.997412
MCLEOD Geraldine	24 SEP 1971	GBRGBR	11.57	23.64	0.978849
OBIJAKU Amanda	26 AUG 2003	GBRGBR	11.57	23.79	0.972678
WILSON Bernice	21 APR 1984	GBRGBR	11.57	23.77	0.973496
Bornscheuer Andrea	1974	TSG Gießen-Wieseck	11.57	23.37	0.990158
Frewer Christina	1986	TV Wattenscheid 01	11.57	23.68	0.977196
Kramer Pernilla	1996	VfL Wolfsburg	11.57	23.52	0.983844
Schlieben Ellen	1966	ASK Vorwärts Potsdam	11.57	23.35	0.991006
SCOTT Sabrina	02 JUN 1979	GBRGBR	11.58	23.73	0.97598
Bethge Andrea	1969	LT 85 Hannover	11.58	23.79	0.973518
Braun Sabine	1965	TV Wattenscheid 01	11.58	23.6	0.981356
Dinkeldein Sandra	1993	SV Werder Bremen	11.58	23.63	0.98011
Körner Marlene	2003	SV Halle	11.58	23.48	0.986371
Hufschmidt, Deborah	1990	MTG Mannheim	11.58	23.93	0.967823
GOLDEN Helen	16 MAY 1953	GBRGBR	11.59	23.14	1.00173
NWAWULOR-KAZEMAKS Marilyn	20 SEP 1992	GBRGBR	11.59	24.14	0.960232
Benzinger Tina	2001	LG Stadtwerke München	11.59	23.63	0.980956
Böhme Anja	1971	LG Bayer Leverkusen	11.59	23.38	0.991446
Kedzierski Johanna	1984	USC Heidelberg	11.59	23.47	0.987644
Okuku Holly	2005	GSV Eintracht Baunatal	11.59	23.62	0.981372
Schönenberger Jana	1971	OSC Potsdam LSH	11.59	23.22	0.998277
CEESAY Amina	19 NOV 1979	GBRGBR	11.6	23.97	0.967877
DUCK Joey	14 APR 1989	GBRGBR	11.6	23.46	0.988917
SHAND-WHITTINGHAM Anike	13 AUG 1989	GBRGBR	11.6	24.26	0.956307
SPENCER Amy	19 SEP 1985	GBRGBR	11.6	23.45	0.989339
Kröning Margit	1959	SC Traktor Schwerin	11.6	23.44	0.989761
Schulze Maren	1982	LG Nord Berlin	11.6	23.56	0.98472
Wöhlk Anke	1970	SC Empor Rostock	11.6	23.27	0.996992
Eichmann Silke	1976	TV Wattenscheid 01	11.61	23.78	0.976451
Gangnus Jala	1986	LG Nordheide	11.61	23.24	0.999139
Göhmann Iris	1962	TK zu Hannover	11.61	23.7	0.979747
Janke Karin	1963	VfL Wolfsburg	11.61	23.11	1.00476
Kasten Sandra	1973	LG Braunschweig	11.61	23.66	0.981403
Niemtschke Gudrun	1961	SC Einheit Dresden	11.61	23.57	0.985151
Schenten Dagmar	1958	LG Frankfurt	11.61	23.19	1.00129
Scherzl Marina	1999	LG Stadtwerke München	11.61	23.44	0.990614
Zaczkiewicz, Claudia	1962	MTG Leasomed Mannheim	11.61	23.92	0.970736
Frank Martina	1965	LG Andernach/Neuwied	11.62	23.69	0.981005
Nwachukwu Sorina	1987	TSV Bayer 04 Leverkusen	11.62	23.69	0.981005
Feller Anke	1971	TSV Bayer 04 Leverkusen	11.63	23.29	0.998712
Jaworski Nele	2004	VfL Wolfsburg	11.63	23.72	0.980607
Lindenberg Janin	1987	SC Magdeburg	11.63	23.47	0.991052
Marahrens Nicole	1977	TV 87 Stadtoldendorf	11.63	23.21	1.00215
Steger Claudia	1959	LG Bayer Leverkusen	11.63	22.95	1.01351
Bußmann Gabriele	1959	ASV Köln	11.64	23.15	1.00562
Cordes Ina	1968	LAV Bayer Uerdingen/Dorm.	11.64	23.31	0.998713
Gebhart Claudia	1970	SG Ulm	11.64	23.52	0.989796
Goydke Sigrid	1952	VfV Hildesheim	11.64	23.71	0.981864
Heine Jutta	1940	SV Hannover 96	11.64	23.54	0.988955
Rohde Brigitte	1954	SC Neubrandenburg	11.64	23.45	0.992751
Schmidt Heike	1958	TV Voerde	11.64	22.97	1.0135
Steinhardt Brigitte	1949	SC Motor Jena	11.64	23.54	0.988955
Sussiek Christina	1960	LG Bayer Leverkusen	11.64	23.2	1.00345
Wegmann Kerstin	1953	SC Dynamo Berlin	11.64	23.64	0.984772
Weyher Petra	1947	SC Turbine Erfurt	11.64	23.54	0.988955
Hähnle, Bärbel	1949	USC Heidelberg	11.64	24.44	0.952537
Schroeder, Maren	1953	KSV Holstein Kiel	11.64	24.04	0.968386
Börner Katja	1986	SV Halle	11.65	23.74	0.981466
Fink Korinna	1981	SC Magdeburg	11.65	23.7	0.983122
Hafner Sabrina	2003	LG TELIS FINANZ Regensburg	11.65	23.71	0.982708
Weißenberg Sophie	1997	SC Neubrandenburg	11.65	23.67	0.984368
Frey, Carina	1994	MTG Mannheim	11.65	24.41	0.954527
Wage, Christiane	1963	TV Lahr	11.65	24.14	0.965203
Biesenbach Kira	1992	TSV Bayer 04 Leverkusen	11.66	23.45	0.994456
Hormann Christina	1972	LG Wipperfürth	11.66	23.63	0.986881
Mulrain, Sabrina	1978	MTG Mannheim	11.66	23.57	0.989393
Wallmann, Katrin	1998	MTG Mannheim	11.67	24.1	0.968465
Kaul, Petra	1967	StTV Singen	11.69	23.73	0.985251
Kaltenmaier, Alena	1964	SG Walldorf Astoria 1902	11.7	23.55	0.993631
Wahl, Christine	1967	USC Heidelberg	11.7	23.73	0.986094
Heinzel, Julia	1996	Wellingdorfer TV	11.7	24.2	0.966942
Ringhoffer, Pia Julianna	1998	LG Region Karlsruhe	11.72	24.35	0.962628
Habermehl, Anette	1961	Karlsruher SC	11.74	24.04	0.976705
Heinz, Ulrike	1967	USC Freiburg	11.74	23.74	0.989048
Schütt, Tanja	1975	LG Offenburg	11.74	24.28	0.967051
Staub, Sabine	1962	Ettlinger SV	11.75	24.71	0.951032
Steidle, Tatjana	1986	USC Freiburg	11.77	24.4	0.964754
Rauch, Verena	1983	LG Leimen/St. Ilgen	11.8	24.39	0.96761
Becker, Cosima	1966	TV Eberbach	11.81	24.09	0.98049
Fleig, Angela	1986	USC Freiburg	11.82	24.01	0.98459
Odhiambo, Joyce	1962	USC Heidelberg	11.84	24.56	0.964169
Seckler, Uschi	1956	LG Bühl	11.84	24.34	0.972884
Seer, Tamara	1989	MTG Mannheim	11.84	23.99	0.987078
Brodbeck, Birgit	1974	SC Rönnau 74	11.87	24.2	0.980992
Schümann, Birgit	1966	SV Fehmarn	11.89	24.17	0.983864
Freiländer, Sabine	1961	MTG Mannheim	11.9	24.44	0.973813
Wenzel, Daniela	1996	MTG Mannheim	11.9	24.86	0.957361
Bornholdt, Manon	1950	SV Wahlstedt	11.9	25.04	0.950479
Müller, Leonie	1996	MTV Lübeck	11.9	24.61	0.967087
Ansel, Sandra	1969	TSG Akus Weinheim	11.91	24.93	0.955475
Kohler, Ingrid	1961	LG Offenburg	11.91	24.42	0.97543
Kränzle, Celina	1997	MTG Mannheim	11.91	24.52	0.971452
Schynowski, Eva	1972	LC Breisgau	11.91	24.2	0.984298
Elsler, Josefina	1991	TSV Bordesholm	11.91	24.21	0.983891
Uhrig, Kathrin	1979	LC Rothaus Breisgau	11.92	24.93	0.956278
Köbke, Yvonne	1973	TSV Travemünde	11.93	24.4	0.977869
Hanusa, Christine	1958	LG Villingen	11.94	24.44	0.977087
Langbein, Martha	1941	USC Heidelberg	11.94	24.84	0.961353
Mayer, Helga	1960	WG Radolfzell-Stahringen	11.94	24.57	0.971917
Hüttmann, Helga	1940	KSV Holstein Kiel	11.94	24.94	0.957498
Rohlff, Annike	1999	LG Flensburg	11.94	24.24	0.985149
Schielke, Karin	1959	TSV Neustadt	11.94	24.37	0.979893
Baumgarten, Helen	2003	SR Yburg Steinbach	11.95	24.22	0.986788
Kleyer, Carolin	1999	LG Region Karlsruhe	11.95	24.86	0.961384
Leistenschneider, Nicole	1967	MTG Mannheim	11.95	24.06	0.99335
Schulte, Verena	1967	MTG Leasomed Mannheim	11.95	24.28	0.984349
Siepelt, Sabine	1977	MTG Mannheim	11.97	24.52	0.976346
Klein, Ilona	1965	MTG Leasomed Mannheim	11.99	24.6	0.974797
Bellerich, Anna-Sophie	1995	SC Rönnau 74	12	24.02	0.999167
Hack, Sabine	1958	TSV Reinbek	12	25.04	0.958466
Angerstein, Anke	1966	LG Karlsruhe	12.01	24.65	0.974442
Diel, Antje	1957	TV Lahr	12.01	24.29	0.988884
Leuthner, Jasmin	1987	LG Offenburg	12.01	24.49	0.980808
Kappler, Bianca	1977	Halstenbeker TS	12.01	24.36	0.986043
Lehmann, Karin	1962	TV Konstanz	12.02	23.71	1.01392
Dickow, Claudia	1963	LG Kiel	12.03	24.23	0.992984
Andl, Gabi	1953	Karlsruher SC	12.04	24.74	0.973323
Grausam, Ute	1965	LC 80 Pforzheim	12.04	24.37	0.9881
Klein, Helga	1931	SG Mannheim	12.04	24.64	0.977273
Müller, Tabea	1998	LG Offenburg	12.04	24.9	0.967068
Zinth, Doris	1957	LG Offenburg	12.04	24.84	0.969404
Scheithe, Andrea	1964	LG Wedel/Pinneberg	12.04	25.04	0.961661
Tschepel, Silvia	1967	Wellingdorfer TV	12.04	24.86	0.968624
Utecht, Petra	1969	TSV Schönberg	12.06	24.94	0.967121
Hehl, Miriam	1991	TV Wehr	12.07	24.85	0.971429
Klauder, Wiebke	1978	SG TSV Kronshagen/Kieler TB	12.07	24.34	0.991783
Schwarten, Pauline	2005	Polizei-SV Eutin	12.07	24.6	0.981301
Gaus, Katharina	1972	MTG Mannheim	12.08	24.9	0.970281
Münch, Nicole	1976	MTG Mannheim	12.08	24.82	0.973409
Vögeli-Fandel, Stefanie	1967	TSG 1862 Weinheim	12.08	24.64	0.980519
Gülzow, Tanja	1974	Kieler TB	12.08	24.65	0.980122
Käther, Nadja	1988	Ahrensburger TSV	12.08	24.95	0.968337
Sonn, Caren	1968	MTG Mannheim	12.1	24.44	0.99018
Angehrn, Isabelle	1978	LC Rothaus Breisgau	12.11	24.66	0.982157
Auch, Christina	1983	MTV Wilster	12.11	24.99	0.969188
Maschmann, Petra	1971	MTV Lübeck	12.13	24.34	0.996713
Brandenberger, Heike	1970	MTG Mannheim	12.14	24.42	0.994267
Fahrendorf, Doreen	1968	TV 1883 Schriesheim	12.14	24.54	0.989405
Früh, Verena	1989	Ettlinger SV	12.14	24.75	0.98101
Beiersdorf, Astrid	1961	TSV Rot-Weiß Niebüll	12.14	25.34	0.958169
Heinemann, Franziska	1951	Kieler TB	12.14	25.64	0.946958
Krebs, Julia	1988	SV Wahlstedt	12.14	25.34	0.958169
Krützmann, Petra	1961	SC Rönnau 74	12.14	24.54	0.989405
Mulack, Birgit	1958	LG Itzehoe	12.14	24.84	0.977456
Friedrich, Franka	1980	TSV Altenholz	12.19	25.66	0.950117
Stöber, Katharina	1990	LG Reinbek/Ohe	12.19	24.51	0.994696
Steinmeyer, Lucy	1999	LAC Lübeck	12.21	24.65	0.990669
Nießen, Anika	2002	Halstenbeker TS	12.22	25.18	0.970612
Schmütz, Jessica	1985	SG TSV Kronshagen/Kieler TB	12.22	24.88	0.982315
Wandt, Patricia	1964	LBV Phönix Lübeck	12.22	25.04	0.976038
Wenners, Martina	1968	Kieler TB	12.22	24.4	1.00164
Sörensen, Kerstin	1967	LG Wedel/Pinneberg	12.23	25.44	0.961478
Heitmann, Silke	1957	LG GH Neum./TSV Kronshagen	12.24	24.84	0.985507
Möller, Silke	1970	Ahrensburger TSV	12.24	25.74	0.951049
Oppong, Anita	1974	Kieler TB	12.24	24.76	0.988691
Pollakowski, Ulrike	1963	LG Dithmarschen-Geest	12.24	25.04	0.977636
Singer, Anja	1968	LG Neumünster	12.24	25.14	0.973747
Sindt, Tatjana	1992	TSV Schönberg	12.26	24.9	0.984739
Hofmeister, Carina	1993	SV Großhansdorf	12.27	25.01	0.981208
Walter, Antje	1961	Kieler TB	12.27	25.22	0.973037
Lucht, Bettina	1982	LG Dithmarschen	12.29	25.57	0.961283
Baganz, Angela	1959	ETSV Gut Heil Itzehoe	12.3	24.89	0.988349
Galjan, Cornelia	1985	SG TSV Kronshagen/Kieler TB	12.3	25.41	0.968123
Hutfilz, Larissa	1998	LG Tönning/St. Peter	12.31	25.06	0.982442
Harder, Darlene	1994	LG Reinbek/Ohe	12.32	25.39	0.970461
Mülling, Marika	1987	LBV Phönix Lübeck	12.32	24.75	0.995556
Arndt, Pauline	1997	SV Preußen Reinfeld	12.33	25.16	0.980127
Borchers, Laura	1992	LG Rendsburg/Büdelsdorf	12.33	25.64	0.961778
van Zijverden, Olga	1988	Lübeck 1876	12.33	25.43	0.969721
Fick, Ulrike	1959	TWG Ostholstein	12.34	25.64	0.962559
Kappert, Benita	2002	SC Wentorf	12.34	25.18	0.980143
Kelch, Birgit	1961	TS Riemann Eutin	12.34	25.24	0.977813
Köhler, Imke	1973	SC Rönnau 74	12.34	24.35	1.01355
Krambeer, Beate	1962	TSV Brunsbüttel	12.34	25.24	0.977813
Lantzsch, Kirsten	1971	LG Kiel	12.34	25.24	0.977813
Lauer, Britta	1990	LG Elmshorn	12.34	25.07	0.984444
Meyer, Alexandra	1968	SV Friedrichsgabe	12.34	25.64	0.962559
Schultheiß, Marie-Luise	1938	Flensburger TB	12.34	25.24	0.977813
Senczek, Renate	1947	ETSV Gut Heil Neumünster	12.34	25.34	0.973954
Schmidt, Nelly	1997	Ratzeburger SV	12.37	25.2	0.981746
Heinemann, Nina	1996	TSV Altenholz	12.38	25.7	0.963424
Lopez Gamarra, Sara	1991	LG Dithmarscher Westküste	12.38	25.39	0.975187
Koberg, Svea	1992	SV Fleckeby	12.39	25.67	0.965329
Eichler, Britta	1963	LG GH Neum./TSV Kronshagen	12.4	25.54	0.971026
Kemp, Katharina	1990	MTV Lübeck	12.4	24.94	0.994387
Heil, Sabrina	2003	TSV St. Peter-Ording	12.41	25.3	0.981028
Pollakowski, Janina	1989	SG TSV Kronshagen/Kieler TB	12.41	25.54	0.971809
Schnepel, Simone	1979	LG Dithmarschen	12.42	25.58	0.971071
Becker, Gabriele	1962	Ahrensburger TSV	12.44	25.04	0.99361
Dannenberg, Margrit	1950	LBV Phönix Lübeck	12.44	25.64	0.970359
Kollar, Meike	1965	LG Wedel/Pinneberg	12.44	25.29	0.983788
Maaß, Nane	2004	MTV Lübeck	12.44	25.09	0.99163
Neumann, Ulrike	1956	LBV Phönix Lübeck	12.44	25.44	0.977987
Petersen, Iris	1970	SV Adelby	12.44	25.62	0.971116
Wulf, Britta	1969	LG Elmshorn	12.44	25.34	0.981847
Groth, Gabriela	1975	MTV Heide	12.46	25.28	0.985759
Schulte, Sabine	1976	Halstenbeker TS	12.46	25.56	0.974961
Rattunde, Finja	2001	MTV Lübeck	12.49	25.68	0.972741
Schmalz, Wiebke	1974	Kaltenkirchener TS	12.5	25.26	0.989707
Schreiber, Marie	1993	SG TSV Kronshagen/Kieler TB	12.5	25.47	0.981547
Stresing, Jacqueline-Milena	1986	TSV Altenholz	12.5	25.27	0.989315

## Sheet: 200-400
name, first name	date or year of birth	nation or club	sec 200m	sec 400m	KsA
JACKSON Shericka	16 JUL 1994	JAMJAM	21.45	49.47	0.867192
THOMAS Gabrielle	07 DEC 1996	USAUSA	21.6	49.68	0.869565
JONES Marion	12 OCT 1975	USAUSA	21.62	49.59	0.87195
FELIX Allyson	18 NOV 1985	USAUSA	21.69	49.26	0.880633
KOCH Marita	18 FEB 1957	GDRGDR	21.71	47.6	0.912185
JACKSON Grace	14 JUN 1961	JAMJAM	21.72	49.57	0.876336
TORRENCE Gwen	12 JUN 1965	USAUSA	21.72	49.64	0.875101
MILLER-UIBO Shaunae	15 APR 1994	BAHBAH	21.74	48.36	0.89909
MBOMA Christine	22 MAY 2003	NAMNAM	21.78	49.22	0.885006
BRISCO-HOOKS Valerie	06 JUL 1960	USAUSA	21.81	48.83	0.893303
WÖCKEL Bärbel	21 MAR 1955	GDRGDR	21.85	49.56	0.881759
PRIVALOVA Irina	22 NOV 1968	RUSRUS	21.87	49.89	0.876729
MARSHALL Pam	16 AUG 1960	USAUSA	21.93	49.99	0.877375
KRATOCHVÍLOVÁ Jarmila	26 JAN 1951	TCHTCH	21.97	47.99	0.915607
SEYNI Aminatou	24 OCT 1996	NIGNIG	21.98	50.69	0.867232
PÉREC Marie-José	09 MAY 1968	FRAFRA	21.99	48.25	0.911503
CHEESEBOROUGH Chandra	10 JAN 1959	USAUSA	21.99	49.05	0.896636
DE KLERK Evette	21 AUG 1965	RSARSA	22.06	50.57	0.872454
RICHARDS-ROSS Sanya	26 FEB 1985	USAUSA	22.09	48.7	0.907187
COOK Kathy	03 MAY 1960	GBRGBR	22.1	49.43	0.894194
MASILINGI Beatrice	10 APR 2003	NAMNAM	22.18	49.53	0.895619
YOUNG-STONE Danette	06 OCT 1964	USAUSA	22.18	50.46	0.879112
BOCHINA Natalya	1962-01-04	URSURS	22.19	51.47	0.86225
GEVAERT Kim	1978-08-05	BELBEL	22.2	51.45	0.862974
SZEWIŃSKA Irena	24 MAY 1946	POLPOL	22.21	49.29	0.901197
OGUNKOYA-OSHEKU Falilat	05 DEC 1968	NGRNGR	22.22	49.1	0.905092
WALTHER Gesine	06 OCT 1962	GDRGDR	22.24	50.03	0.889067
FREEMAN Cathy	16 FEB 1973	AUSAUS	22.25	48.63	0.915073
IRBY Lynna	06 DEC 1998	USAUSA	22.25	49.8	0.893574
ATKINS Joanna	31 JAN 1989	USAUSA	22.27	50.39	0.883906
DAVIS-THOMPSON Pauline	09 JUL 1966	BAHBAH	22.27	49.28	0.903815
YUSUF Fatimat	02 MAY 1971	NGRNGR	22.28	49.43	0.901477
KNOLL Silke-Beate	21 FEB 1967	GERGER	22.29	50.85	0.876696
HURTIS Muriel	25 MAR 1979	FRAFRA	22.31	51.41	0.867925
ADELEKE Rhasidat	29 AUG 2002	IRLIRL	22.34	49.2	0.90813
COLANDER LaTasha	23 AUG 1976	USAUSA	22.34	49.87	0.895929
WIMBLEY Shakima	23 APR 1995	USAUSA	22.34	49.52	0.902262
ŢIRLEA-MANOLACHE Ionela	09 FEB 1976	ROUROU	22.35	49.88	0.896151
PAULINO Marileidy	25 OCT 1996	DOMDOM	22.36	48.98	0.913026
BARBER Me'Lisa	04 OCT 1980	USAUSA	22.37	50.87	0.879497
KAPACHINSKAYA Anastasiya	21 NOV 1979	RUSRUS	22.38	50.02	0.894842
MYERS Sandra	09 JAN 1961	ESPESP	22.38	49.67	0.901148
SPRUNGER Lea	05 MAR 1990	SUISUI	22.38	50.52	0.885986
LEATHERWOOD Lillie	06 JUL 1964	USAUSA	22.38	49.66	0.901329
POSPELOVA Svetlana	24 DEC 1979	RUSRUS	22.39	49.8	0.899197
PURSIAINEN Mona-Lisa	1951-06-21	FINFIN	22.39	51.27	0.873415
FRANCIS Phyllis	04 MAY 1992	USAUSA	22.42	49.61	0.90385
BRYZGINA Olga	30 JUN 1963	URSURS	22.44	48.27	0.92977
BREUER Grit	16 FEB 1972	GERGER	22.45	49.42	0.908539
DIGGS Talitha	22 AUG 2002	USAUSA	22.45	49.93	0.899259
GONCHARENKO Svetlana	28 MAY 1971	RUSRUS	22.46	50.23	0.894286
KLAVER Lieke	20 AUG 1998	NEDNED	22.46	49.81	0.901827
WILLIAMS Jodie	28 SEP 1993	GBRGBR	22.46	49.97	0.898939
HENRY Desiree	26 AUG 1995	GBR GBR	22.46	52.27	0.859384
KOCEMBOVÁ Taťána	02 MAY 1962	TCHTCH	22.47	48.59	0.924882
WHITNEY Kaylin	09 MAR 1998	USAUSA	22.47	50.29	0.893617
WASHINGTON Taylor	06 MAY 1993	USAUSA	22.48	50.25	0.894726
IKAUNIECE Vineta	04 DEC 1962	URSURS	22.49	50.71	0.887005
CAMPBELL Juliet	17 MAR 1970	JAMJAM	22.5	50.11	0.898024
WILLIAMS Shericka	17 SEP 1985	JAMJAM	22.5	49.32	0.912409
SCHWAB Corinna	1999-04-05	GERGER	22.51	50.91	0.884306
HALL Patricia	16 OCT 1982	JAMJAM	22.51	50.71	0.887793
NASER Salwa Eid	23 MAY 1998	BRNBRN	22.51	48.14	0.935189
GUSHCHINA Yuliya	04 MAR 1983	RUSRUS	22.53	50.01	0.90102
DIXON Diane	23 SEP 1964	USAUSA	22.53	49.84	0.904093
DU Xiujie	27 NOV 1971	CHNCHN	22.53	50.39	0.894225
DUNMORE Makenzie	07 OCT 1997	USAUSA	22.53	50.35	0.894935
MCLAUGHLIN-WHILBY Anneisha	06 JAN 1986	JAMJAM	22.54	50.76	0.888101
Maletzki Doris	1952	SC Dynamo Berlin	22.54	50.34	0.895511
ZYKINA Olesya	07 OCT 1980	RUSRUS	22.55	50.15	0.899302
HAYES Quanera	07 MAR 1992	USAUSA	22.55	49.72	0.90708
GRENOT Libania	12 JUL 1983	ITAITA	22.56	50.3	0.897018
Gaugel Heidi-Elke	1959	VfL Sindelfingen	22.56	52.83	0.85406
COLLINS Michelle	12 FEB 1971	USAUSA	22.57	50.11	0.900818
HASTINGS Natasha	23 JUL 1986	USAUSA	22.57	49.84	0.905698
BENEŠOVÁ Hana	1975-04-19	CZECZE	22.57	51.18	0.881985
FOMENKO Viktoriya	02 OCT 1970	UKRUKR	22.57	50.94	0.886141
AMERTIL Christine	18 AUG 1979	BAHBAH	22.58	50.09	0.901577
ELLIS Kendall	08 MAR 1996	USAUSA	22.59	49.99	0.903781
ARTYMATA Eleni	16 MAY 1986	CYPCYP	22.61	50.8	0.890157
RENZHINA Yekaterina	18 OCT 1994	RUSRUS	22.61	51.01	0.886493
SCHERSING Petra	1965-07-18	GDRGDR	22.61	49.3	0.917241
Müller Petra	1965	SC Chemie Halle	22.61	49.3	0.917241
ONUORA Anyika	28 OCT 1984	GBRGBR	22.64	50.87	0.890112
Müller Laura Marie	1995	LC Rehlingen	22.65	51.69	0.876378
STUY Hrystyna	1988-02-03	UKRUKR	22.66	51.58	0.878635
YURCHENKO Aelita	1965	URSURS	22.67	49.47	0.916515
ZAYTSEVA Olga	1984-11-10	RUSRUS	22.67	49.49	0.916145
NAZAROVA Olga	1965-06-01	URSURS	22.68	49.11	0.923641
PAVLOVA Pepa	1961	BULBUL	22.68	51.32	0.883866
Rockmeier Gabriele	1973	LG Olympia Dortmund	22.68	53.75	0.843907
LEVINA Tatyana	1977-02-28	RUSRUS	22.69	50.78	0.893659
AGYAPONG Finette	01 FEB 1997	GBR GBR	22.69	52.41	0.865865
OANTA Iolanda	11 OCT 1965	ROUROU	22.7	50.55	0.898121
SIDOROVA Marina	1950-01-16	URSURS	22.72	50.98	0.89133
STOUTE Jennifer	1965-04-16	GBRGBR	22.73	51.53	0.882205
RUZINA Yelena	1964-04-03	URSURS	22.73	50.65	0.897532
STREIDT Ellen	1952-07-27	GDRGDR	22.73	50.15	0.906481
HARTLEY Donna	01 MAY 1955	GBRGBR	22.75	51.43	0.884698
ANTYUKH Natalya	1981-06-26	RUSRUS	22.75	49.85	0.912738
MERRY Katharine	1974-09-21	GBRGBR	22.76	49.59	0.917927
KIEŁBASIŃSKA Anna	1990-06-26	POLPOL	22.76	50.28	0.90533
ALEKSEYEVA Tatyana	07 OCT 1963	URSURS	22.77	49.98	0.911164
BOLINGO Cynthia	1993-01-12	BELBEL	22.79	50.19	0.908149
Gonska Nadine	1990	MTG 1899 Mannheim	22.79	52	0.876538
Gonska, Nadine	1990	MTG Mannheim	22.79	52	0.876538
GHOSH Shanta	1975-01-03	GERGER	22.8	51.25	0.889756
SCUTT Michelle	1960-06-17	GBRGBR	22.8	50.63	0.900652
VINOGRADOVA-PETUSHINSKAYA Yelena	28 MAR 1964	URSURS	22.8	51.38	0.887505
SINZEL Margit	1958-06-17	GDRGDR	22.81	50.92	0.895915
STAMBOLOVA Vanya	1983-11-28	BULBUL	22.81	49.53	0.921058
LITVINOVA Lyudmila	1985-06-08	RUSRUS	22.82	50.27	0.907897
PYHYDA Nataliya	1981-01-30	UKRUKR	22.82	50.62	0.90162
SALAHUB Natallia	31 MAR 1975	BLRBLR	22.82	51.61	0.884325
SHMONINA Marina	1965-02-09	URSURS	22.82	50.52	0.903405
BUSCH Sabine	1962-11-21	GDRGDR	22.83	49.24	0.927295
OHURUOGU Christine	17 MAY 1984	GBRGBR	22.85	49.41	0.924914
WALTHER Kerstin	1961-04-15	GDRGDR	22.86	51.12	0.894366
KACZMAREK Natalia	1998-01-17	POLPOL	22.86	49.48	0.92401
NOVIKOVA Yelena	27 OCT 1985	RUSRUS	22.86	51.3	0.891228
THIMM Ute	1958-07-10	FRGFRG	22.87	50.28	0.909706
NEUBAUER Dagmar	1962-06-03	GDRGDR	22.87	49.58	0.922549
PACHOLAK-GUZOWSKA Anna	1980-01-15	POLPOL	22.87	51.29	0.891792
Rübsam Dagmar	1962	SC Turbine Erfurt	22.87	49.58	0.922549
BOL Femke	2000-02-23	NEDNED	22.88	49.44	0.925566
ADEOYE Margaret	22 APR 1985	GBR GBR	22.88	51.93	0.881186
Eberding Karla	1959	SC Magdeburg	22.88	52.54	0.870955
ROCKMEIER Birgit	1973-11-29	GERGER	22.9	51.45	0.890185
BLASZAK Genowefa	1957-08-22	POLPOL	22.9	50.7	0.903353
BEJNAR Monika	10 MAR 1981	POLPOL	22.91	51.68	0.88661
FIRMIN Lenora GUION	1991-08-07	FRAFRA	22.91	51.68	0.88661
RYZHOVA Kseniya	1987-04-19	RUSRUS	22.91	49.8	0.92008
KHARLAMOVA Marina	24 MAY 1962	URSURS	22.93	50.63	0.905787
VAIČULE Gunta	09 MAR 1995	LATLAT	22.94	51.25	0.89522
PIPI Ama	1995-11-26	GBRGBR	22.95	50.75	0.904433
Steger Claudia	1959	LG Bayer Leverkusen	22.95	52.48	0.874619
BASKAKOVA Irina	1956-08-25	URSURS	22.96	50.19	0.914923
RADECKA-PAKASZEWSKA Zuzanna	1975-04-02	POLPOL	22.96	51.58	0.890268
WILMI-HÄGGMAN Pirjo	1951-06-08	FINFIN	22.96	50.56	0.908228
IVANOVA Natalya	1981-06-25	RUSRUS	22.97	50.79	0.904509
Schmidt Heike	1958	TV Voerde	22.97	52.26	0.879066
BELIMPASAKI Maria	1991-06-19	GREGRE	22.98	50.45	0.911001
Sommer Ulrike	1959	LAC Quelle Fürth	23	52.73	0.872369
Hesselbarth Annett	1966	SC Chemie Halle	23.02	51.14	0.900274
Zehrt Monika	1952	SC Dynamo Berlin	23.04	51.08	0.902114
FRASER Donna	07 NOV 1972	GBR GBR	23.05	49.79	0.925889
Weit Inna	1988	LC Paderborn	23.08	53.81	0.857833
YEARGIN Nicole	11 AUG 1997	GBR GBR	23.09	50.96	0.906201
Cremer Esther	1988	TV Wattenscheid 01	23.1	51.62	0.895002
NIELSEN Lina	13 MAR 1996	GBR GBR	23.11	51.54	0.896779
Janke Karin	1963	VfL Wolfsburg	23.11	50.64	0.912717
Arendt Helga	1964	SC Eintracht Hamm	23.13	50.36	0.918586
BARNETT Helen	13 MAY 1958	GBR GBR	23.14	52.12	0.887951
Wilden Rita	1947	TuS 04 Leverkusen	23.14	50.88	0.909591
Bußmann Gabriele	1959	LG Ahlen/Hamm	23.15	49.75	0.930653
MCCONNELL Lee	09 OCT 1978	GBR GBR	23.16	50.82	0.911452
Krause Christiane	1950	ASC Darmstadt	23.17	53.81	0.861178
Sussiek Christina	1960	LG Bayer Leverkusen	23.2	52.94	0.876464
Marahrens Nicole	1977	LG Weserbergland	23.21	52.2	0.889272
Schönenberger Jana	1971	OSC Potsdam	23.22	52.42	0.885921
HYLTON Cheriece	12 DEC 1996	GBR GBR	23.23	52.88	0.878593
Kisabaka Linda	1969	LG Bayer Leverkusen	23.26	51.16	0.909304
SHAKES-DRAYTON Perri	21 DEC 1988	GBR GBR	23.27	50.5	0.921584
Wöhlk Anke	1970	SC Empor Rostock	23.27	52.56	0.885464
MURPHY Catherine	21 SEP 1975	GBR GBR	23.28	51.36	0.906542
Schabinger Michaela	1961	MTV 1881 Ingolstadt	23.28	52.2	0.891954
Feller Anke	1971	TSV Bayer 04 Leverkusen	23.29	51.82	0.898881
Haggenmüller Angelika	1969	MTV 1881 Ingolstadt	23.29	53.29	0.874085
DIAMOND Emily	11 JUN 1991	GBR GBR	23.3	51.23	0.909623
Derr Manuela	1971	SC Neubrandenburg	23.3	51.95	0.897016
ANNING Amber	18 NOV 2000	GBR GBR	23.31	51.62	0.903138
Cordes Ina	1968	LAV Bayer Uerdingen/Dorm.	23.31	53.06	0.878628
CURBISHLEY Allison	03 JUN 1976	GBR GBR	23.33	50.71	0.920134
NEEF Melanie	26 MAY 1970	GBR GBR	23.35	51.18	0.912466
CLARK Zoey	25 OCT 1994	GBR GBR	23.36	51.22	0.912144
Abt Gudrun Maria	1962	TSV Genkingen	23.37	52.22	0.895059
Bornscheuer Andrea	1974	TSG Gießen-Wieseck	23.37	53.23	0.878076
Franzen Judith	1999	TSV Bayer o4 Leverkusen	23.37	52.27	0.894203
Pollmächer Anja	1985	LAC Erdgas Chemnitz	23.37	52.9	0.883554
COX Shana	22 JAN 1985	GBR GBR	23.38	51.12	0.91471
WILLIAMS Hannah	23 APR 1998	GBR GBR	23.38	51.6	0.906202
Rohländer Uta	1969	SV Halle	23.38	50.33	0.929068
SOTHERTON Kelly	13 NOV 1976	GBR GBR	23.39	52.19	0.89634
Krug Barbara	1956	SC DHfK Leipzig	23.39	51.03	0.916716
Rücker Anja	1972	TuS Jena	23.4	49.74	0.940893
Kirchner Sylvia	1963	SC Magdeburg	23.42	52.53	0.891681
Everts Sabine-Christiane	1961	LAV Düsseldorf	23.43	52.8	0.8875
Schniggendiller Cornelia	1956	LG Gütersloh	23.43	53.94	0.868743
Spelmeyer Ruth Sophia	1990	VfL Oldenburg	23.43	51.43	0.911141
Uebel Ronny	1963	SC Traktor Schwerin	23.43	51.93	0.902369
Kröning Margit	1959	SC Traktor Schwerin	23.44	52.66	0.890239
Rädisch Iris	1963	ASK Vorwärts Potsdam	23.44	53.63	0.874138
Seidler Helga	1949	SC Karl-Marx-Stadt	23.44	51.64	0.907823
Handt Angelika	1954	SC Einheit Dresden	23.45	51.24	0.915301
LIVERPOOL Yasmin	15 JAN 1999	GBR GBR	23.46	51.73	0.907017
Decker Elke	1957	TuS 04 Leverkusen	23.47	51.59	0.909866
Kinzel Gisela-Maria	1961	SC Eintracht Hamm	23.47	50.83	0.92347
Krafzik Carolina	1995	VfL Sindelfingen	23.47	52.05	0.901825
Lindenberg Janin	1987	SC Magdeburg	23.47	51.97	0.903213
ALLCOCK Amy	20 AUG 1993	GBR GBR	23.48	51.36	0.91433
BOARD Lillian	13 DEC 1948	GBR GBR	23.49	52.12	0.901381
Feuerbach Cornelia	1963	SC Magdeburg	23.5	53.41	0.879985
Marquardt Christiane	1958	TSC Berlin	23.5	51.45	0.913508
EVANS Louise	07 OCT 2000	GBR GBR	23.51	52.84	0.889856
Fahrendorff Doreen	1968	SC Neubrandenburg	23.51	52.44	0.896644
Möhlenkamp Friederike	1992	LT DSHS Köln	23.51	52.55	0.894767
Fuhrmann Dagmar	1954	LG Frankfurt	23.52	51.51	0.913221
BEESLEY Meghan	15 NOV 1989	GBR GBR	23.53	52.79	0.891457
KELLY Hannah	20 DEC 2000	GBR GBR	23.53	52.52	0.89604
Heilmann Marion	1961	SC Traktor Schwerin	23.54	52.08	0.903994
Steinhardt Brigitte	1949	SC Motor Jena	23.54	52.4	0.898473
Schulze Maren	1982	LG Nord Berlin	23.56	53.69	0.877631
Hoffmann Claudia	1982	SC Potsdam	23.58	51.65	0.913069
DUDGEON Sinead	09 JUL 1976	GBR GBR	23.59	52.05	0.906436
Franke Inka	1962	SC Traktor Schwerin	23.59	52.62	0.896617
BACKFORD Pat	06 AUG 1965	GBR GBR	23.6	52.26	0.903176
WALL Kim	21 APR 1983	GBR GBR	23.6	52.11	0.905776
Popp Bettina	1957	SC DHfK Leipzig	23.6	51.62	0.914374
Mörig Jutta	1953	SC Turbine Erfurt	23.61	51.24	0.921546
Kette Nancy Mojisola	1977	Team Erfurt	23.62	51.81	0.911793
Vöcking Birgit	1960	ASV Köln	23.62	52.52	0.899467
Ekpo-Umoh Florence	1977	USC Mainz	23.63	51.13	0.924311
Anton Gisela	1954	SC Dynamo Berlin	23.64	50.78	0.931075
Krug Petra	1963	SC Einheit Dresden	23.64	52.03	0.908707
Mayer Mona	2001	LG TELIS FINANZ Regensburg	23.66	52.25	0.905646
Kampf Stephanie	1978	VfL Sindelfingen	23.67	53.3	0.88818
Roßley Karin	1957	SC Cottbus	23.67	51.31	0.922627
GUNNELL Sally	29 JUL 1966	GBR GBR	23.69	51.45	0.920894
Nwachukwu Sorina	1987	TSV Bayer 04 Leverkusen	23.69	51.53	0.919464
Fink Korinna	1981	SC Magdeburg	23.7	52.31	0.906136
Steffen Wiebke	1973	SC Empor Rostock	23.7	53.1	0.892655
Goydke Sigrid	1952	VfV Hildesheim	23.71	53.79	0.881577
Lehmann, Karin	1962	TV Konstanz	23.71	54.22	0.874585
Uibel Birgit	1964	SC Cottbus	23.72	52.39	0.905516
Alber Sabine	1965	LG Kappelberg	23.73	53.19	0.892273
Wahl Christine	1967	USC Heidelberg	23.73	52.92	0.896825
Wahl, Christine	1967	USC Heidelberg	23.73	52.92	0.896825
Anlauf Susanne	1960	LG Ostsaar	23.74	53.92	0.880564
Barth Elke	1956	TSV Bayer Dormagen	23.74	52.27	0.90836
Heinz Ulrike	1967	USC Freiburg	23.74	53.65	0.884995
Rauhut Evelyn	1958	Eintracht Duisburg	23.74	53.58	0.886152
Heinz, Ulrike	1967	USC Freiburg	23.74	53.98	0.879585
Heinrich Evelin	1959	SC Einheit Dresden	23.75	52.5	0.904762
JOHN Yemi Mary	03 MAY 2003	GBR GBR	23.78	51.04	0.931818
Hoven Annkathrin	2001	TSV Bayer o4 Leverkusen	23.78	52.64	0.903495
Rasch Silke	1959	VfL Wolfsburg	23.78	53.44	0.88997
BARR Victoria	14 APR 1982	GBR GBR	23.79	52.4	0.908015
Wallburg Ina	1959	OSC Thier Dortmund	23.79	53.95	0.881928
PURKISS Melanie	11 MAR 1979	GBR GBR	23.8	52.66	0.903912
Breu Martina	1972	Erfurter LAC	23.8	52.47	0.907185
Watschke Corinna	1961	VfL Wolfsburg	23.8	53.8	0.884758
NIELSEN Laviai	13 MAR 1996	GBR GBR	23.81	50.83	0.936848
MASSEY Kelly	11 JAN 1985	GBR GBR	23.84	51.96	0.917629
OWUSU Lesley	21 DEC 1978	GBR GBR	23.89	52.27	0.9141
SANDERS Nicola	23 JUN 1982	GBR GBR	23.89	49.65	0.962336
MCASLAN Kirsten	01 SEP 1993	GBR GBR	23.92	52.13	0.917706
MEADOWS Jennifer	17 APR 1981	GBR GBR	23.92	52.67	0.908297
FROST Helen	12 MAR 1974	GBR GBR	23.93	52.4	0.913359
Lippe, Gabi	1967	MTG Leasomed Mannheim	23.97	55.74	0.860065
WAKE Laura	03 MAY 1991	GBR GBR	23.98	52.98	0.905247
Seer, Tamara	1989	MTG Mannheim	23.99	54.49	0.880529
PARRY Jane	15 NOV 1964	GBR GBR	24	52.65	0.911681
ABICHI Mary	19 NOV 1990	GBR GBR	24.01	52.6	0.912928
NEWNHAM Emily	19 MAY 2004	GBR GBR	24.01	52.15	0.920805
Bellerich, Anna-Sophie	1995	SC Rönnau 74	24.02	54.28	0.885041
BUNDY-DAVIES Seren	30 DEC 1994	GBR GBR	24.03	51.26	0.937573
Habermehl, Anette	1961	Karlsruher SC	24.04	56.64	0.84887
JAMISON Victoria Anne	19 MAY 1977	GBR GBR	24.06	52.97	0.908439
Leistenschneider, Nicole	1967	MTG Mannheim	24.06	52.67	0.913613
Mergenthaler, Hannah	1997	MTG Mannheim	24.06	52.83	0.910846
NICOL Gemma	27 JUL 1986	GBR GBR	24.08	52.61	0.915415
Wallmann, Katrin	1998	MTG Mannheim	24.1	55.76	0.864419
OKYERE Nadine	29 NOV 1986	GBR GBR	24.13	52.26	0.92346
TURNER Jessica	08 AUG 1995	GBR GBR	24.15	52.57	0.918775
EASTON Carey	16 NOV 1979	GBR GBR	24.18	52.44	0.922197
Elsler, Josefina	1991	TSV Bordesholm	24.21	57.65	0.839896
KARAGOUNIS Helen	28 SEP 1981	GBR GBR	24.22	51.78	0.935496
MCAULAY Carys	18 JAN 1998	GBR GBR	24.23	51.57	0.939694
Dickow, Claudia	1963	Kieler TB	24.23	55.63	0.871113
Rohlff, Annike	1999	LG Flensburg (24,38 - 2019)	24.24	57.17	0.847997
Kersten, Bettina	1965	TSG Wiesloch	24.26	53.19	0.912202
KNIGHT Jessie	15 JUN 1994	GBR GBR	24.27	51.8	0.937066
Schulte, Verena	1967	MTG Leasomed Mannheim	24.28	56	0.867143
Diel, Antje	1957	TV Lahr	24.29	56.24	0.863798
Moll, Cornelia	1982	LG Region Karlsruhe	24.3	54.58	0.890436
Klauder, Wiebke	1978	SG TSV Kronshagen/Kieler TB	24.34	53.83	0.904328
Maschmann, Petra	1971	MTV Lübeck	24.34	54.49	0.893375
Köhler, Imke	1973	SC Rönnau 74	24.35	52.94	0.919909
Grausam, Ute	1965	LC 80 Pforzheim	24.37	57.14	0.852993
Wenners, Martina	1968	Kieler TB	24.4	54.54	0.894756
Kohler, Ingrid	1961	LG Offenburg	24.42	56.94	0.857745
Sommer, Sophia	1995	TV Bahlingen	24.47	53.17	0.920444
Fahr, Annina	1993	TUS Gottmadingen	24.54	53.94	0.9099
Müller-Foell, Julia	1989	MTG Mannheim	24.54	54.57	0.899395
Tritschler, Christa	1963	TV Neustadt	24.54	56.63	0.866678
Wilmsmeyer, Sonja	1975	USC Freiburg	24.54	53.35	0.919963
Krützmann, Petra	1961	SC Rönnau 74	24.54	54.62	0.898572
Precker, Anke	1965	LC Neckar Odenwald	24.59	54.3	0.905709
Klein, Ilona	1965	MTG Leasomed Mannheim	24.6	55.72	0.882986
Krämer, Sarah	1996	SG Walldorf Astoria 1902	24.62	55.3	0.890416
Steimle, Silvia	1973	LG Offenburg	24.62	53.82	0.914902
Angerstein, Anke	1966	LG Karlsruhe	24.65	56.74	0.868876
Gülzow, Tanja	1974	Kieler TB	24.65	57.67	0.854864
Steinmeyer, Lucy	1999	LAC Lübeck	24.65	53.96	0.91364
Angehrn, Isabelle	1978	LC Rothaus Breisgau	24.66	54.63	0.902801
Onyambu, Elisabeth	1967	USC Heidelberg	24.68	53.7	0.919181
Andl, Gabi	1953	Karlsruher SC	24.74	55.44	0.892496
Kaufmann, Larissa	1985	LG Karlsruhe	24.74	56.1	0.881996
Mülling, Marika	1987	LBV Phönix Lübeck	24.75	56.8	0.871479
Oppong, Anita	1974	Kieler TB	24.76	54.98	0.900691
General, Bente	1981	SG TSV Kronshagen/Kieler TB	24.83	55.38	0.896714
Karck, Dagmar	1953	TB Emmendingen	24.84	53.9	0.921707
Zinth, Doris	1957	LG Offenburg	24.84	55.28	0.898698
Heitmann, Silke	1957	Kieler TB	24.84	57.84	0.858921
Gröne, Jana	2000	MTG Mannheim	24.86	56.37	0.882029
Schmütz, Jessica	1985	SG TSV Kronshagen/Kieler TB	24.88	57.23	0.869474
Sindt, Tatjana	1992	TSV Schönberg	24.9	56.61	0.879703
Stadelbacher, Judith	1992	LG Offenburg	24.91	55.94	0.890597
Düsseldorf, Sabine	1964	TV Konstanz	24.92	55.87	0.892071
Hofmeister, Carina	1993	LG Reinbek/Ohe	25.01	56.82	0.880324
Ammann, Alina	1998	TuS Esingen	25.03	55.3	0.905244
Becker, Gabriele	1962	Ahrensburger TSV	25.04	58.04	0.862853
Pollakowski, Ulrike	1963	LG Dithmarschen-Geest	25.04	58.47	0.856508
Maaß, Nane	2004	MTV Lübeck	25.09	56.39	0.889874
Pfaff, Magdalena	1999	LBV Phönix Lübeck	25.14	58.79	0.855247
Singer, Anja	1968	LG Neumünster	25.14	57.2	0.879021
Schmidt, Nelly	1997	Ratzeburger SV	25.2	54.76	0.92038
Walter, Antje	1961	Kieler TB	25.22	56.56	0.891796
Krambeer, Beate	1962	TSV Brunsbüttel	25.24	57.84	0.872752
Murmann, Silke	1961	Rendsburger TSV	25.24	58.01	0.870195
Kollar, Meike	1965	LG Wedel/Pinneberg	25.29	58.84	0.859619
Heil, Sabrina	2003	TSV St. Peter-Ording	25.3	56.45	0.896368
Wulf, Britta	1969	LG Elmshorn	25.34	57.21	0.885859
van Zijverden, Olga	1988	Lübeck 1876	25.43	57.57	0.883446
Eichler, Britta	1963	LG GH Neum./TSV Kronshagen	25.54	56.15	0.909706
Schwichtenberg, Ruth	1953	Flensburger TB	25.54	58.24	0.87706
Skov, Sabine	1953	TSB Flensburg	25.54	56.34	0.906638
Eising, Annette	1965	Kaltenkirchener TS	25.55	56.22	0.908929
Schnepel, Simone	1979	LG Dithmarschen	25.58	57.08	0.896286
Krayenborg, Lene	1993	SG TSV Kronshagen/Kieler TB	25.6	57.16	0.895731
Dannenberg, Margrit	1950	LBV Phönix Lübeck	25.64	57.14	0.897445
Petersen, Elke	1948	LG Stormarn-Süd	25.64	57.43	0.892913
Schultz, Claudia	1973	LG Wedel/Pinneberg	25.69	55.16	0.931472
Woch, Folke	1997	LG Schleswig/Fahrdorf	25.71	58.17	0.883961
Möller, Silke	1970	Ahrensburger TSV	25.74	58.44	0.880903
Teut, Regina	1955	Rendsburger TSV	25.74	54.87	0.938218

## Sheet: 400-800
name, first name	date or year of birth	nation or club	sec 400m	sec 800m	KsA
KRATOCHVÍLOVÁ Jarmila	26 JAN 1951	TCHTCH	47.99	113.28	0.847281
MILES-CLARK Jearl	04 SEP 1966	USAUSA	49.4	116.4	0.848797
MU Athing	08 JUN 2002	USAUSA	49.57	115.04	0.861787
NEUBAUER Dagmar	03 JUN 1962	GDRGDR	49.58	118.36	0.837783
Rübsam Dagmar	1962	SC Turbine Erfurt	49.58	118.36	0.837783
QUIROT Ana Fidelia	23 MAR 1963	CUBCUB	49.61	114.44	0.867005
SEMENYA Caster	07 JAN 1991	RSARSA	49.62	114.25	0.868621
BUSSMANN Gaby	08 OCT 1959	FRGFRG	49.75	118.11	0.842435
Bußmann Gabriele	1959	LG Ahlen/Hamm	49.75	118.11	0.842435
KOTLYAROVA Olga	12 APR 1976	RUSRUS	49.77	117.24	0.849028
FUCHSOVÁ Helena	03 JUN 1965	CZECZE	50.21	118.56	0.846997
USOVICH Ilona	1982-11-14	BLRBLR	50.31	119.38	0.842855
MORAA Mary	15 JUN 2000	KENKEN	50.38	116.71	0.863336
CROOKS Charmaine	08 AUG 1962	CANCAN	50.45	118.52	0.851333
CURBISHLEY Allison	03 JUN 1976	GBRGBR	50.71	123.3	0.822547
MINEYEVA Olga	01 OCT 1952	URSURS	50.78	114.81	0.884592
USOVICH Svetlana	14 OCT 1980	BLRBLR	50.79	118.11	0.860046
YEVSEYEVA Inna	14 AUG 1964	URSURS	50.8	117.2	0.866894
CALATAYUD Zulia	09 NOV 1979	CUBCUB	50.87	116.09	0.876389
OLIZARENKO Nadezhda	1953-11-28	URSURS	50.96	113.43	0.898528
KEOUGH-STAINES Linda	26 DEC 1963	GBRGBR	50.98	121.82	0.836973
MATUSEVIČIENĖ Dalia	1962-11-12	URSURS	51.12	117.27	0.871834
KISABAKA Linda	1969-04-09	GERGER	51.16	118.24	0.865359
HORVAT Anita	1996-09-07	SLOSLO	51.22	118.73	0.862798
BUNDY-DAVIES Seren	30 DEC 1994	GBRGBR	51.26	123.73	0.828578
GOOSSENS Ester	1972-02-21	NEDNED	51.35	119.24	0.861288
GURINA Lyubov	1957-08-06	URSURS	51.38	115.56	0.889235
Marquardt Christiane	1958	TSC Berlin	51.45	121	0.850413
KHRUSHCHELYOVA Natalya	20 MAY 1973	RUSRUS	51.49	116.59	0.883266
DRYAKHLOVA Mariya	1984-04-24	RUSRUS	51.57	118.26	0.872146
WACHTEL Christine	1965-01-06	GDRGDR	51.62	115.32	0.895248
Weiß Anita	1955	SC Neubrandenburg	51.62	115.74	0.891999
KIRILOVA Tsvetelina	1977-07-14	BULBUL	51.63	119.46	0.86439
Hoffmann Claudia	1982	SC Potsdam	51.65	121.18	0.852451
PODYALOVSKAYA Irina	19 OCT 1959	URSURS	51.67	115.69	0.893249
HODGKINSON Keely	03 MAR 2002	GBRGBR	51.76	115.77	0.894187
Wodars Sigrun	1965	SC Neubrandenburg	51.8	115.26	0.898837
Knippel Anja	1974	Erfurter LAC	51.86	120.11	0.863542
Siebach Renate	1952	SC DHfK Leipzig	51.94	122.2	0.850082
OKORO Marilyn	23 SEP 1984	GBRGBR	52.02	118.45	0.878345
Sieger Susann	1968	SC Cottbus	52.02	124.49	0.83573
Schmidt Romy	1959	SC Turbine Erfurt	52.27	119.42	0.875398
Kohlmann Fabienne	1989	LG Karlstadt/Gambach/Lohr	52.3	118.34	0.883894
Lix Ute	1965	TV 1861 Gelnhausen	52.3	120.89	0.865249
Urbansky Ulrike	1977	Team Erfurt	52.35	122.96	0.851496
Meißner Heike	1970	LG Dresdner SC 1898	52.36	119.5	0.876318
Weinstein Erika	1950	LG Schweinfurt	52.47	125	0.83952
Buse Bettina	1955	SC Dynamo Berlin	52.54	119.24	0.881248
MEADOWS Jennifer	17 APR 1981	GBRGBR	52.67	117.93	0.893242
Leistenschneider Nicole	1967	MTG 1899 Mannheim	52.67	122.1	0.862735
Leistenschneider, Nicole	1967	MTG Mannheim	52.67	127.36	0.827104
MADDOX Laura	13 MAY 1990	GBRGBR	52.73	123.86	0.851445
Giggel Heidrun	1962	SC Magdeburg	52.74	121.47	0.868363
Schmidt Nelly	1997	LT DSHS Köln	52.77	125.56	0.840554
Everts Sabine-Christiane	1961	LAV Düsseldorf	52.8	126.17	0.836966
Walter Carolin	1988	TSV Bayer 04 Leverkusen	52.85	123.11	0.858582
Hering Christina	1994	LG Stadtwerke München	52.91	119.41	0.88619
Bruhns Birte	1970	SC Empor Rostock	52.97	119.17	0.888982
Beutelspacher Simone	1974	VfL Sindelfingen	53.13	122.44	0.867854
Lesch Gabriela Katharina	1964	TSV Kirchhain	53.13	119.24	0.891144
Hook Ursula-Maria	1957	OSC Dortmund	53.14	119.4	0.890117
Sommer, Sophia	1995	TV Bahlingen	53.17	127.53	0.833843
Schmidt Sarah	1996	LAZ Mönchengladbach	53.19	122.04	0.871681
Ferenz Daniela	1990	LG Neckar-Enz	53.2	125.61	0.847066
Behrendt Dürten	1962	SC Neubrandenburg	53.21	120.02	0.886686
Falck Hildegard	1949	VfL Wolfsburg	53.24	118.45	0.898945
Mosler Sonja	1993	TV Herkenrath 09	53.24	122.82	0.86696
Teichmann Ivonne	1977	SC Magdeburg	53.25	118.62	0.897825
Gutewort Marlies	1953	OSC Berlin	53.33	124.86	0.854237
Vogelgesang Ines	1963	SC Dynamo Berlin	53.43	118.36	0.902839
Brudel Birgit	1961	ASK Vorwärts Potsdam	53.44	120.16	0.889481
Kloppe Steffi	1956	SC Chemie Halle	53.44	121.7	0.878225
Zwiener Sabine-Beate	1967	SV Neckarsulm	53.45	119.33	0.895835
Schott Maren	1976	TSV Bayer 04 Leverkusen	53.55	123.64	0.866225
Liebich Beate	1958	SC Neubrandenburg	53.6	120	0.893333
Sablitzki Regine	1957	SC Dynamo Berlin	53.62	122.3	0.87686
Koczelnik Brigitte	1953	TuS 04 Leverkusen	53.63	121.7	0.881348
Peters Gabriele	1959	SC DHfK Leipzig	53.66	120.6	0.889884
Huneke Heike	1966	VfL Ockenhausen	53.7	121.56	0.883514
Onyambu, Elisabeth	1967	USC Heidelberg	53.7	123.25	0.8714
Hübner Marion	1962	SC Chemie Halle	53.72	118.18	0.909122
Bens Monika	1966	VfL Ockenhausen	53.74	121.29	0.886141
Kleinbrahm Petra	1959	LG Bayer Leverkusen	53.74	121.51	0.884536
Kunz Julia-Kristin	1984	LG Nike Berlin	53.79	125.5	0.857211
Klauder, Wiebke	1978	SG TSV Kronshagen/Kieler TB	53.83	132.11	0.814927
Politz Marita	1950	SC Chemie Halle	53.84	119.9	0.898082
Schulz Ellen	1962	SC Neubrandenburg	53.85	119.9	0.898249
Karck, Dagmar	1953	TB Emmendingen	53.9	128.36	0.839825
Brückner Brigitte	1956	LAC Quelle Fürth	53.91	122.03	0.883553
Erdmann Yvonne	1967	SC Traktor Schwerin	53.91	123.91	0.870148
Schmidt Gertrud	1942	SC Traktor Schwerin	53.94	123.2	0.875649
Walter, Carolin	1988	LG Karlsruhe	53.96	124.22	0.868781
Bellerich, Anna-Sophie	1995	SC Rönnau 74	54.28	131.71	0.824235
Gärtner, Katrin	1962	MTV Karlsruhe	54.44	129.2	0.842724
Seer, Tamara	1989	MTG Mannheim	54.49	131.85	0.826545
Krützmann, Petra	1961	SC Rönnau 74	54.62	130.5	0.837088
Reinert, Jana	1998	SV 1899 Langensteinbach	54.69	124.67	0.877356
Stickel, Christine	1962	TV 34 Pforzheim	54.92	132.8	0.827108
Karcher, Christine	1961	LG Ortenau Nord	55.05	126.85	0.867954
Schultz, Claudia	1973	LG Wedel/Pinneberg	55.16	123.62	0.892412
Stillger, Carola	1958	TV Bad Rappenau	55.23	127.5	0.866353
Zinth, Doris	1957	LG Offenburg	55.28	132.3	0.835676
Ammann, Alina	1998	TuS Esingen	55.3	123.57	0.895039
Muck, Martina	1967	USC Heidelberg	55.33	123.16	0.898506
Schöne, Elisa	1987	TV Lahr	55.35	130.83	0.846136
General, Bente	1981	SG TSV Kronshagen/Kieler TB	55.38	125.95	0.879397
Gutwein, Beate	1960	TV Staufen	55.44	123.05	0.901097
Gauch, Iris	1967	TSG Wiesloch	55.45	132.7	0.83572
Jooß, Verena	1979	Ettlinger SV	55.5	127.34	0.871682
Dickow, Claudia	1963	Kieler TB	55.63	133.82	0.831415
Fischer, Ute	1956	DJK Villingen	55.74	124.9	0.892554
Kadletz, Birgit	1965	TV Konstanz	55.75	132.73	0.840051
Höfler, Petra	1966	TV Konstanz	55.81	124.7	0.895108
Düsseldorf, Sabine	1964	TV Konstanz	55.87	133.79	0.835189
Galitschke, Eva	1974	Rastatter TV	55.88	128.64	0.868781
Klaus, Jutta	1953	LC/USC Freiburg	56.13	126.1	0.890246
Eising, Annette	1965	LG Wedel/Pinneberg	56.22	129.2	0.870279
Duda, Evelyn	1953	LG Coop Kurpfalz	56.24	128.48	0.875467
Braun, Susanne	1960	TV Konstanz	56.34	130.09	0.86617
Garz, Johanna	1984	StTV Singen	56.43	133.14	0.847679
Bakker, Julia	1994	LC Breisgau	56.49	133.73	0.844837
Kloth, Marita	1947	LBV Phönix Lübeck	56.54	126.1	0.896749
Walter, Antje	1961	Kieler TB	56.56	137.8	0.8209
Panter, Viktoria	1959	TV Oberkirch	56.64	133.9	0.846004
Hoppe, Liesa Katharina	1990	LG Karlsruhe	56.65	133.43	0.849134
Schumacher, Anna	1998	LG Kurpfalz	56.65	130.26	0.869799
Folkerts, Meike	1985	LG Baar	56.68	130.55	0.868326
Hoffmann, Marliese	1942	LG Mannheim	56.7	128.8	0.880435
Vierk, Ilka	1964	LBV Phönix Lübeck	56.71	136.2	0.832746
Kallabis, Jolanda	2005	FT 1844 Freiburg	56.74	125.75	0.902425
Frey, Christiane	1961	TV Helmsheim	56.76	130.4	0.870552
Dold, Gabi	1969	SV Schopfheim	56.77	131.57	0.862963
Grimm, Heike	1973	TSG 1862 Weinheim	56.83	129.81	0.875587
Zehnle, Patricia	1964	TV Lahr	56.87	132.12	0.860884
Schulz, Bärbel	1968	LG Hardt	57.04	134.02	0.851216
Bülau, Karin	1960	LBV Phönix Lübeck	57.14	127.7	0.89491
Kubasch, Stella	1992	Ratzeburger SV	57.24	125.75	0.910378
Weiß, Martina	1961	TSB Flensburg	57.24	129.9	0.881293
Mues, Berit	1998	LAC Kronshagen	57.27	128.1	0.894145
Eylmann, Jaqueline	1999	SV Friedrichsgabe	57.42	135.24	0.849157
Heiland, Imke	1963	LG Wedel/Pinneberg	57.44	130.7	0.878959
Witt, Birthe	1965	LBV Phönix Lübeck	57.54	138.2	0.832706
Flöttmann, Anne Inger	1977	TSV Malente	57.64	135.4	0.851403
Jaacks, Maike	1963	SC Rönnau 74	57.64	135.9	0.848271
Gülzow, Tanja	1974	Ratzeburger SV	57.67	136.32	0.846097
Greve, Sigrid	1947	Büdelsdorfer TSV	57.83	132.92	0.870147
Klein, Vanessa	1976	LBV Phönix Lübeck	57.84	135.6	0.853097
Teegen, Isabell	1993	SC Rönnau 74	58	128.78	0.900761
Hartmann, Karen	1970	Kieler TB	58.02	127.09	0.913054
Klassen, Nathalie	1983	SG TSV Kronshagen/Kieler TB	58.03	131.83	0.880376
Wienecke, Julia	1985	LG Reinbek/Ohe	58.08	137.32	0.845907
Jamrozy, Ute	1964	Polizei-SV Eutin	58.24	131.92	0.882959
Andresen, Heike	1962	TSV Medelby	58.3	137.2	0.849854
Theophil, Nicole	1968	LG Wedel/Pinneberg	58.4	128.74	0.907255
Ballner, Ariane	1996	LG Elmshorn	58.43	125.98	0.927608
Hansen, Heidrun	1958	Kieler TB	58.44	134.2	0.870939
Peucker, Antje	1967	LG Wedel/Pinneberg	58.46	128.86	0.907341
Gers, Agnes Thurid	1997	LG Flensburg	58.53	131.17	0.89243
Nielsen, Miriam	1973	SV Adelby	58.54	135.4	0.864697
Winckler, Kerstin	1968	Kieler TB	58.54	128.8	0.909006
Karstens, Verena	1975	Wellingdorfer TV	58.63	127.7	0.918246
Killius, Svenja	1985	SG TSV Kronshagen/Kieler TB	58.84	130.54	0.901486
Stange, Karen	1979	Preetzer TSV	59.02	137.54	0.858223

## Sheet: 800-1500
name, first name	date or year of birth	nation or club	sec 800m	sec 1500m	KsA
OLIZARENKO Nadezhda	28 NOV 1953	URSURS	113.43	239.48	0.888096
SEMENYA Caster	07 JAN 1991	RSARSA	114.25	239.92	0.892876
KAZANKINA Tatyana	17 DEC 1951	URSURS	114.94	232.47	0.927055
MELINTE Doina	27 DEC 1956	ROUROU	115.05	236.7	0.911359
ČEPLAK Jolanda	12 SEP 1976	SLOSLO	115.19	242.44	0.890865
MUTOLA Maria de Lurdes	27 OCT 1972	MOZMOZ	115.19	241.5	0.894332
Wachtel Christine	1965	SC Neubrandenburg	115.32	258.03	0.837984
SHTEREVA Nikolina	21 JAN 1955	BULBUL	115.42	242.33	0.893049
PROVIDOKHINA Tatyana	26 MAR 1953	URSURS	115.46	238.37	0.908199
LIU Dong	24 DEC 1973	CHNCHN	115.54	236.31	0.916751
GURINA Lyubov	06 AUG 1957	URSURS	115.56	242.47	0.893616
Weiß Anita	1955	SC Neubrandenburg	115.74	247.1	0.878238
MASTERKOVA Svetlana	17 JAN 1968	RUSRUS	115.87	237.11	0.916268
PODKOPAYEVA Yekaterina	11 JUN 1952	URSURS	115.96	236.65	0.918762
VESELKOVA Lyudmila	25 OCT 1950	URSURS	115.96	242.37	0.897079
JEPKOSGEI Janeth	13 DEC 1983	KENKEN	116.04	242.32	0.897883
HOLMES Kelly	19 APR 1970	GBRGBR	116.21	237.9	0.915905
ZAYTSEVA Zamira	16 FEB 1953	URSURS	116.21	236.14	0.922731
AGLEDTINOVA Ravilya	10 FEB 1960	URSURS	116.24	238.4	0.91422
QU Yunxia	25 DEC 1972	CHNCHN	116.24	230.46	0.945717
AGLETDINOVA Ravilya	1960-02-10	URSURS	116.24	238.4	0.91422
IVAN Paula	20 JUL 1963	ROUROU	116.42	233.96	0.933012
BENHASSI Hasna	01 JUN 1978	MARMAR	116.43	242.54	0.900083
DJATÉ-TAILLARD Patricia	03 JAN 1971	FRAFRA	116.53	242.26	0.901898
RIGEL Zoya	15 OCT 1952	URSURS	116.57	243.9	0.896141
PETROVA Totka	17 DEC 1956	BULBUL	116.59	240.15	0.91029
KOSTETSKAYA Yekaterina	31 DEC 1986	RUSRUS	116.67	241.77	0.904811
LOVIN Fita	14 JAN 1951	ROUROU	116.67	240.12	0.911029
ALEMU Habitam	09 JUL 1997	ETHETH	116.71	241.41	0.906471
MUIR Laura	09 MAY 1993	GBRGBR	116.73	234.5	0.933342
BORISOVA Lyudmila	30 JUL 1959	URSURS	116.78	242.13	0.904318
HASSAN Sifan	01 JAN 1993	NEDNED	116.81	231.95	0.94425
ROGACHOVA Lyudmila	30 OCT 1966	URSURS	116.82	236.91	0.92456
REEKIE Jemma	06 MAR 1998	GBRGBR	116.9	238.65	0.918448
CHERKASOVA Svetlana	20 MAY 1978	RUSRUS	116.93	245.55	0.892868
LI Liu	12 MAR 1971	CHNCHN	116.96	239.34	0.91627
SUM Eunice Jepkoech	10 APR 1988	KENKEN	116.99	241.54	0.908157
WELTEJI Diribe	13 MAY 2002	ETHETH	117.02	235.08	0.933352
BRUNS Ulrike	17 NOV 1953	GDRGDR	117.06	239.9	0.914912
Klapezynski Ulrike	1953	SC Cottbus	117.06	239.9	0.914912
CHIZHENKO Yuliya	30 AUG 1979	RUSRUS	117.07	235.68	0.931374
ZAKHAROVA Galina	07 SEP 1956	URSURS	117.08	237.72	0.92346
WANG Yuan	08 APR 1976	CHNCHN	117.18	239.81	0.916194
ULLRICH-KÖRNER Hildegard	20 DEC 1959	GDRGDR	117.2	238.67	0.920727
GRACE Kate	24 OCT 1988	USAUSA	117.2	241.33	0.910579
KLINGER Margrit	22 JUN 1960	FRGFRG	117.22	242.66	0.905743
SOBOLEVA Yelena	03 OCT 1982	RUSRUS	117.28	236.43	0.930085
LANGE-HAHMANN Andrea	03 JUN 1966	GDRGDR	117.31	240.07	0.916217
Lange Andrea	1966	ASK Vorwärts Potsdam	117.31	240.07	0.916217
SILAI Ileana	14 OCT 1941	ROUROU	117.39	243.5	0.903927
WADE Kirsty	06 AUG 1962	GBRGBR	117.42	240.73	0.914562
ZÚÑIGA Maite	28 DEC 1964	ESPESP	117.45	240.59	0.915328
ARAFI Rababe	12 JAN 1991	MARMAR	117.47	238.84	0.922192
ZAVYALOVA Yekaterina	01 MAR 1991	RUSRUS	117.53	240.11	0.917782
SOROKINA Tamara	15 AUG 1950	URSURS	117.55	238.89	0.922627
HAILU Freweyni	12 FEB 2001	ETHETH	117.57	236.28	0.932977
Schroeder Antje	1963	SC Chemie Halle	117.57	251.36	0.877004
LANG Yinglai	22 AUG 1979	CHNCHN	117.62	231.34	0.953305
MARTÍNEZ Mayte	17 MAY 1976	ESPESP	117.62	245.05	0.899969
CHIDU Tudorita	17 OCT 1967	ROUROU	117.64	245.69	0.897778
DORIO Gabriella	26 JUN 1957	ITAITA	117.66	238.65	0.924419
BELL Alexandra	04 NOV 1992	GBRGBR	117.66	247.06	0.892951
KIPYEGON Faith	10 JAN 1994	KENKEN	117.68	229.11	0.963075
LANGAT Nancy Jebet	22 AUG 1981	KENKEN	117.75	240.13	0.919424
LU Yi	10 APR 1974	CHNCHN	117.77	240.05	0.919886
JAMAL Maryam Yusuf	16 SEP 1984	BRNBRN	117.8	236.18	0.935198
HURTA Sage	23 JUN 1998	USAUSA	117.85	241.79	0.913887
WÜHN Katrin	1965-11-19	GDRGDR	117.86	243.77	0.906541
CONSTANTIN Mitica	1962-08-18	ROUROU	117.87	243.04	0.909341
GORELOVA Natalya	18 APR 1973	RUSRUS	117.9	239.7	0.922247
MARTINEZ Brenda	08 SEP 1987	USAUSA	117.91	240.94	0.917578
MEADOWS Jennifer	17 APR 1981	GBRGBR	117.93	259.36	0.852555
SNOWDEN Katie	09 MAR 1994	GBRGBR	118	240.04	0.921721
ARTYOMOVA Natalya	05 JAN 1963	URSURS	118.05	239.16	0.925505
ZBROZHEK Oksana	12 JAN 1978	RUSRUS	118.06	240.86	0.91905
KITOVA Svetlana	25 JUN 1960	URSURS	118.08	241.02	0.918596
JACOBS Regina	28 AUG 1963	USAUSA	118.08	240.35	0.921157
FAVOR HAMILTON Suzy	08 AUG 1968	USAUSA	118.1	237.4	0.932761
Gluth Doris	1955	SC Empor Rostock	118.11	247	0.896584
PUICĂ Maricica	29 JUL 1950	ROUROU	118.12	237.22	0.933627
CHUVASHOVA Vera	07 OCT 1959	URSURS	118.12	245.73	0.901294
CHEBET Winny	20 DEC 1990	KENKEN	118.13	238.2	0.929865
TOMOVA Lilyana	1946-08-09	BULBUL	118.14	244.97	0.904243
OEHME Heike	11 NOV 1963	GDRGDR	118.16	242.9	0.912104
Hübner Marion	1962	SC Chemie Halle	118.18	257.81	0.859499
LYNE Rebecca	04 JUL 1982	GBRGBR	118.2	246.85	0.897812
CHEPCHIRCHIR Nelly	04 JUN 2003	KENKEN	118.23	238.96	0.927692
MAI Yvonne	1965-08-22	GDRGDR	118.32	242.69	0.914129
GULYAYEVA Aleksandra	1994-04-30	RUSRUS	118.34	244.49	0.907552
UCENY Morgan	10 MAR 1985	USAUSA	118.37	240.06	0.924534
CICHOCKA Angelika	15 MAR 1988	POLPOL	118.41	241.61	0.918914
Falck Hildegard	1949	VfL Wolfsburg	118.45	254.6	0.872324
OKORO Marilyn	23 SEP 1984	GBRGBR	118.45	251.85	0.881849
CALDWELL Abbey	03 JUL 2001	AUSAUS	118.48	241.15	0.921211
BUKIS Anna	08 SEP 1953	POLPOL	118.51	239.67	0.927134
KLOCOVÁ Lucia	20 NOV 1983	SVKSVK	118.51	242.99	0.914467
BAIKAUSKAITĖ Laimutė	10 JUN 1956	URSURS	118.52	240.24	0.925012
MESHESHA Hirut	20 JAN 2001	ETHETH	118.54	234.87	0.946321
JING Liu	03 FEB 1971	CHNCHN	118.55	237.03	0.937777
BECLEA-SZEKELY Violeta	26 MAR 1965	ROUROU	118.57	238.29	0.932976
HOFFMEISTER Gunhild	06 JUL 1944	GDRGDR	118.61	241.4	0.921267
Teichmann Ivonne	1977	SC Magdeburg	118.62	251.15	0.885576
WARTENBERG Christiane	27 OCT 1956	GDRGDR	118.63	237.71	0.935725
NANYONDO Winnie	23 AUG 1993	UGAUGA	118.63	239.56	0.928499
CUSMA Elisa	1981-07-24	ITAITA	118.63	244.98	0.907957
WYSOCKI Ruth	08 MAR 1957	USAUSA	118.65	240.18	0.926258
MODAHL-EDWARDS Diane	17 JUN 1966	GBRGBR	118.65	254.41	0.87445
DEHIBA CHAHYD Hind	17 MAR 1979	FRAFRA	118.67	239.76	0.928037
CHAHYD Hind DEHIBA	17 MAR 1979	FRAFRA	118.67	239.76	0.928037
TROST Katharina	28 JUN 1995	GERGER	118.68	242.32	0.91831
WANG Qingfen	27 MAR 1973	CHNCHN	118.69	238.97	0.931262
DEBUES-STAFFORD Gabriela	13 SEP 1995	CANCAN	118.7	236.12	0.942582
MESELE Worknesh	11 JUN 2001	ETHETH	118.71	237	0.939161
BOULMERKA Hassiba	10 JUL 1968	ALGALG	118.72	235.3	0.946026
SIMPSON Jemma	10 FEB 1984	GBRGBR	118.74	246.39	0.903598
YEVDOKIMOVA Natalya	17 MAR 1978	RUSRUS	118.75	237.73	0.936593
KUZNETSOVA Olga	23 OCT 1967	RUSRUS	118.77	243.18	0.915757
STOYANOVA-GOSPODINOVA Vanya	12 DEC 1958	BULBUL	118.78	243.14	0.915985
WILLARD Anna	31 MAR 1984	USAUSA	118.8	239.38	0.930529
YACHMENEVA Marina	14 JUL 1961	URSURS	118.84	242.84	0.917579
GERDES Roswitha	1961-06-28	FRGFRG	118.88	244.41	0.911992
GASSER Sandra	27 JUL 1962	SUISUI	118.9	241.1	0.924668
SACRAMENTO Carla	10 DEC 1971	PORPOR	118.94	237.71	0.93817
KREMLYOVA Lyubov	21 DEC 1961	URSURS	118.95	238.71	0.934319
GHICAN Viorica	09 JUN 1965	ROUROU	118.96	242.76	0.918809
JEPKOSGEI Nelly	14 JUL 1991	BRNBRN	118.96	240.99	0.925557
BELLÒ Elena	1997-01-18	ITAITA	118.97	245.09	0.91015
BAILEY Shireen	27 SEP 1959	GBRGBR	118.98	242.32	0.920632
ENNAOUI Sofia	30 AUG 1995	POLPOL	118.98	239.7	0.930695
SCOTT Susan	26 SEP 1977	GBRGBR	119.02	247	0.903492
HILTZ Nikki	23 OCT 1994	USAUSA	119.03	239.61	0.931435
YATSINSKA Vesela	1951-01-16	BULBUL	119.03	244.7	0.912061
CAHILL Christina	25 MAR 1957	GBRGBR	119.05	240.57	0.927874
BIRYUKOVA-SAMOROKOVA Irina	06 DEC 1964	RUSRUS	119.07	244.66	0.912516
RYDZ Małgorzata	1967-01-18	POLPOL	119.12	241.91	0.923277
LISHCHINSKA Irina	1976-01-15	UKRUKR	119.15	240.04	0.930704
SHARMINA Yekaterina	1986-08-06	RUSRUS	119.17	245.06	0.911792
AREGAWI Abeba	1990-07-05	SWESWE	119.2	236.6	0.944632
PANTELEYEVA Natalya	1983-09-10	RUSRUS	119.21	240.81	0.928195
GUERRERO Esther	1990-02-07	ESPESP	119.22	242.41	0.922146
Kolberg Majtie	1999	LG Kreis Ahrweiler	119.24	256.37	0.872079
Lesch Gabriela Katharina	1964	Eintracht Frankfurt	119.24	254.45	0.87866
Strotzer Waltraud	1952	SC Motor Jena	119.25	246.14	0.908401
MAGEEAN Ciara	12 MAR 1992	IRLIRL	119.27	236.63	0.945067
MITREA Aurica	19 OCT 1959	ROUROU	119.27	244.83	0.913414
KRAUS Brigitte	1956-08-12	GERGER	119.28	241.54	0.925934
NELYUBOVA Olga	1964-07-12	RUSRUS	119.29	241.42	0.926472
BOFFEY Isabelle	13 APR 2000	GBRGBR	119.3	258.39	0.865697
GIOLITTI Florence	1966-08-31	FRAFRA	119.32	245.78	0.910265
BARBULESCU-POPESCU Liliana	1982-02-05	ROUROU	119.34	240.35	0.930986
JACKSON Emma	1988-06-07	GBRGBR	119.37	245.83	0.910461
KIESSLING Ellen	1968-02-17	GDRGDR	119.41	244.44	0.915946
KUIVISTO Sara	1991-08-17	FINFIN	119.41	242.35	0.923845
Hering Christina	1994	LG Stadtwerke München	119.41	248.3	0.901707
BLETSCH Yvette	1965-08-22	GDRGDR	119.43	245.12	0.913558
BUHĂIANU-ANTOCI Elena	1975-01-16	ROUROU	119.43	242.9	0.921907
POPOVA Svetlana	1959-02-03	URSURS	119.43	240.53	0.930991
CIONCAN Maria	1977-06-19	ROUROU	119.44	238.39	0.939427
EWERLÖF Malin	1972-06-02	SWESWE	119.44	245.49	0.912257
VARGA Judit	1976-04-16	HUNHUN	119.46	241.26	0.928407
NEUMANN-LIEBETRAU Christina	30 DEC 1953	GDRGDR	119.47	245.3	0.913193
TRACEY Adelle	27 MAY 1993	GBRGBR	119.5	242.55	0.923779
TRABALDO Fabia	05 MAR 1972	ITAITA	119.51	243.62	0.919798
BAKER Ellie	1998-06-03	GBRGBR	119.52	243.95	0.918631
PADUREAN Ana	05 MAY 1969	ROUROU	119.53	244.97	0.914882
VAN HULST Elly	1959-06-09	NEDNED	119.62	243.63	0.920607
KLOSTERHALFEN Konstanze	1997-02-18	GERGER	119.65	238.92	0.938991
ENGLAND Hannah	06 MAR 1987	GBRGBR	119.66	241.89	0.927539
BAKER Lorraine	09 APR 1964	GBRGBR	119.67	251.95	0.890578
MOORE Charlotte	04 FEB 1985	GBRGBR	119.75	253	0.887475
JUDD Jess	1995-01-07	GBRGBR	119.77	243.73	0.921383
GRIFFITHS Ann	20 AUG 1965	GBRGBR	119.81	247.59	0.907322
MÅKESTADBOVIM Ingvill	1981-08-07	NORNOR	119.82	242.2	0.927591
ZOLOTOVA Yevgeniya	1983-04-28	RUSRUS	119.85	242.49	0.926713
FENN Joanne	19 OCT 1974	GBRGBR	119.86	249.54	0.900607
Schulz Ellen	1962	SC Neubrandenburg	119.9	251.32	0.894527
MCDONALD Sarah	02 AUG 1993	GBRGBR	119.91	240.46	0.935005
IVES Abigail	06 FEB 2004	GBRGBR	119.92	258.94	0.868348
Pfeiffer Astrid	1964	SC Dynamo Berlin	119.93	244.42	0.92001
Liebich Beate	1958	SC Turbine Erfurt	120	239.9	0.937891
LEONARD Alison	17 MAR 1990	GBRGBR	120.08	249.59	0.902079
Schacht Elisabeth	1958	ASV Köln	120.13	247.11	0.911512
DOBRISKEY Lisa	23 DEC 1983	GBRGBR	120.14	239.5	0.940553
Brudel Birgit	1961	ASK Vorwärts Potsdam	120.16	251.43	0.896074
Gradzki Monika	1979	TV Wattenscheid 01	120.16	253.83	0.887602
SEGRAVE Hannah	14 APR 1995	GBRGBR	120.18	252.24	0.893346
Harrer Corinna	1991	LG TF Regensburg	120.34	244.3	0.923608
NICHOLSON-HARTIGAN Beverley	10 JUN 1967	GBRGBR	120.39	247.98	0.91028
Schiller Marina	1957	SC Dynamo Berlin	120.4	250.3	0.901918
PARRY-TULLETT Hayley	17 FEB 1973	GBRGBR	120.49	239.95	0.941524
Krott Martina-Agnes	1958	LAV Bayer Uerdingen/Dorm.	120.54	247	0.91503
Spill Tanja	1995	LAV Bayer Uerdingen/Dorm.	120.66	255.7	0.884777
MURRAY Yvonne	04 OCT 1964	GBRGBR	120.78	241.2	0.938899
SELMAN Jenny	09 MAR 1991	GBRGBR	120.86	248.24	0.912877
daFonseca-Wollheim Kristina	1972	SV Halle	120.86	241.42	0.938665
MHLANGA Khahisa	26 DEC 1999	GBRGBR	120.87	252.84	0.896343
Zauber Angelika	1958	SC Dynamo Berlin	120.92	239.9	0.945081
MCDONALD Katy-Ann	01 JUN 2000	GBRGBR	120.98	252.3	0.899078
WALCOTT-NOLAN Revee	06 MAR 1995	GBRGBR	121.02	246.23	0.921547
TAYLOR Celia	22 JAN 1977	GBRGBR	121.16	250.41	0.907212
WALLACE Erin	18 MAY 2000	GBRGBR	121.16	246.29	0.922388
Weidner Simone	1969	OSC Berlin	121.19	250.26	0.907981
Bens Monika	1966	VfL Ockenhausen	121.29	259.25	0.877218
Cerveny Liane	1956	SC Chemie Halle	121.3	254.3	0.894367
GIBSON Claire	25 DEC 1982	GBRGBR	121.34	254.3	0.894662
Schierjott Sylvia	1963	SC Chemie Halle	121.4	248.82	0.914818
Friedrich Kathleen	1977	SC Potsdam	121.45	244.27	0.932242
Schenk Sylvia	1952	Eintracht Frankfurt	121.5	254.8	0.894084
BEST Charlotte	07 MAR 1985	GBRGBR	121.5	256.57	0.887916
Wüstenhagen Carmen	1973	LG Nike SCC Berlin	121.53	246.7	0.923667
Klein Hanna	1993	SG Schorndorf	121.6	242.58	0.939896
Schmidt Birgit-Maria	1963	LC Paderborn	121.63	248.19	0.918878
COLEBROOK Teena	18 DEC 1956	GBRGBR	121.65	247.69	0.920884
Büngener Simone	1962	Sportunion Annen	121.69	255.52	0.892958
Kloppe Steffi	1956	SC Chemie Halle	121.7	251.8	0.906225
BENNING Christine	30 MAR 1955	GBRGBR	121.77	241.53	0.945302
BRATHWAITE Elizabeth	10 APR 1985	GBRGBR	121.78	251.96	0.906245
Friedmann Birgit	1960	Eintracht Frankfurt	121.8	245.9	0.928731
CROWE Amanda	21 OCT 1973	GBRGBR	121.83	250.68	0.911246
ROSS Joanna	18 FEB 1981	GBRGBR	121.84	257.04	0.888772
Werner Kerstin	1982	TV Wattenscheid 01	121.86	255.85	0.893053
THOMAS Charlene	06 MAY 1982	GBRGBR	121.87	243.74	0.9375
WEIGHTMAN Laura	01 JUL 1991	GBRGBR	121.87	240.09	0.951752
Goldfuß Janina	1983	TV Wattenscheid 01	121.89	258.09	0.88552
SMITH Stacey	24 FEB 1990	GBRGBR	121.93	246.81	0.926295
Lehmann Gabriele	1956	SC Cottbus	122	243.1	0.940971
Brückner Brigitte	1956	LAC Quelle Fürth	122.03	258.53	0.885028
Schmidt Sarah	1996	TSV Bayer Leverkusen	122.04	257.37	0.88909
FAIRCHILD Jacqueline	03 MAY 1989	GBRGBR	122.09	254.43	0.899732
Krebs Denise	1987	TV Wattenscheid 01	122.12	246.01	0.930755
Schimmer Norma	1970	OSC Berlin	122.17	256.32	0.893683
ROBINSON Lynne	21 JUN 1969	GBRGBR	122.18	252.03	0.908969
Wagner Iris	1951	SC Turbine Erfurt	122.2	251.7	0.91031
Horna Annett	1987	TSV Bayer 04 Leverkusen	122.29	250.98	0.913594
Sujew Diana	1990	SC Potsdam	122.29	245.62	0.93353
Sablitzki Regine	1957	SC Dynamo Berlin	122.3	258.6	0.886746
Kallensee Stefanie	1969	Eintracht Frankfurt	122.34	251.88	0.910702
Beutelspacher Simone	1974	VfL Sindelfingen	122.44	255.93	0.897023
PARRY Alison	19 JUN 1966	GBRGBR	122.47	253.26	0.906702
BROWNING Charlotte	08 OCT 1987	GBRGBR	122.52	249.86	0.919415
Prochnow Katja	1968	SC Neubrandenburg	122.52	252.8	0.908722
TWELL Stephanie	17 AUG 1989	GBRGBR	122.58	242.54	0.947627
Bruns Anne	1974	LAV Meppen 91	122.62	249.12	0.922899
Kühnemund Sylvia	1974	SV Halle	122.69	245.96	0.935289
Merten Christa	1944	SV Bayer 04 Leverkusen	122.7	252.6	0.910778
Henkel Jeanette	1966	SC Karl-Marx-Stadt	122.75	254.87	0.903034
MORLEY Suzanne	11 OCT 1957	GBRGBR	122.79	252.79	0.910761
RILEY Catherine	04 JUN 1982	GBRGBR	122.79	254.3	0.905353
FINCH Gemma	01 AUG 1997	GBRGBR	122.81	255.24	0.902166
GIBSON Lynn	06 JUL 1969	GBRGBR	122.83	252.32	0.912755
COLE Rowena	13 JAN 1992	GBRGBR	122.88	258.07	0.892781
KELLY Sarah	31 OCT 1992	GBRGBR	122.89	259.09	0.889339
Michallek Vera	1958	SC Eintracht Hamm	122.9	244.29	0.943295
Bartels Astrid	1963	LG Nord-West Hamburg	122.96	257.61	0.894957
Allmandinger Margret	1958	VfB Stuttgart 1893	123	255.2	0.903703
Sujew Elina	1990	SC Potsdam	123.01	247.36	0.932421
Gutwein, Beate	1960	LC/USC Heidelberg	123.05	264.22	0.873207
SLY Wendy	05 NOV 1959	GBRGBR	123.06	244.14	0.945103
Riedel Claudia	1967	SC Karl-Marx-Stadt	123.06	255	0.904853
ALLISON Joan	10 JUN 1947	GBRGBR	123.1	254.81	0.905822
HENAGHAN Dianne	06 AUG 1965	GBRGBR	123.1	256.19	0.900943
STEWART Mary	25 FEB 1956	GBRGBR	123.11	246	0.938338
Heim Thea	1992	LG TF Regensburg	123.12	252.94	0.912667
OGDEN Rachael	23 JUL 1979	GBRGBR	123.14	251.89	0.91662
Muck, Martina	1967	USC Heidelberg	123.16	269.09	0.85817
PARKINSON-OVENS Hayley	05 DEC 1975	GBRGBR	123.19	250.34	0.92267
Kock Maren	1990	LG TF Regensburg	123.24	247.56	0.93341
Stuhlmacher Katrin	1967	TSC Berlin	123.24	255.06	0.905963
Onyambu, Elisabeth	1967	USC Heidelberg	123.25	275.31	0.839395
NEWCOMBE Rachel	25 FEB 1967	GBRGBR	123.28	251.24	0.920037
MITCHELL Jeina	21 JAN 1975	GBRGBR	123.36	254.14	0.910128
BELL Georgia	17 OCT 1993	GBRGBR	123.38	252.16	0.917423
MACDOUGALL Lynne	18 FEB 1965	GBRGBR	123.43	245.96	0.94093
FRASER Kirsty	27 NOV 1995	GBRGBR	123.45	258.81	0.894358
Granz Caterina	1994	LG Nord Berlin	123.46	245.6	0.942539
CAFFEL Kelly	10 FEB 1979	GBRGBR	123.48	250.22	0.925286
CLITHEROE Helen	02 JAN 1974	GBRGBR	123.53	241.1	0.960675
Ammann Alina	1998	TuS Esingen	123.57	256.74	0.902445
Klöpfel Birgit	1961	SC Eintracht Hamm	123.58	261.73	0.885311
Burkard Elena	1992	LG farbtex Nordschwarzwald	123.6	246.51	0.940124
Schultz, Claudia	1973	LG Wedel/Pinneberg	123.62	267.73	0.865751
MURRAY Madeleine	19 OCT 1993	GBRGBR	123.66	250.17	0.92682
Hoffmann Jeannette	1979	LG Nike Berlin	123.69	259.41	0.894024
Leist Sabine	1966	SC Traktor Schwerin	123.74	250.39	0.926604
CARTER Alexandra	01 APR 1980	GBRGBR	123.78	254.44	0.91215
KING Shaikira	14 JUL 2008	GBRGBR	123.79	259.31	0.895092
TAYLOR-CAREY Sheila	12 AUG 1946	GBRGBR	123.81	244.81	0.948261
WESTLEY Abby	15 JUL 1987	GBRGBR	123.9	248.74	0.933957
ARCHER Holly	07 NOV 1993	GBRGBR	123.94	247.2	0.940079
Marxen Kerstin	1985	TSV Gomaringen	124.04	257.09	0.904644
Trauth Katrin Judith	1984	SC Magdeburg	124.04	255.69	0.909598
Friedmann, Ursula	1971	LG Offenburg	124.06	250.81	0.927445
Friedmann Ursula	1971	LG Offenburg	124.06	250.81	0.927445
Heldt Ursula	1956	TSV Salzgitter	124.07	261	0.891307
Kubasch Stella	1992	Ratzeburger SV	124.1	258.69	0.899484
Oppat Manuela	1963	SC Dynamo Berlin	124.11	253.33	0.918589
Büngener Bettina	1959	SU Annen	124.2	258.47	0.900975
Fleischer Andrea	1963	SC Motor Jena	124.21	252.93	0.920783
Klein-Arndt Melanie	1975	LAV Bayer Uerdingen/Dorm.	124.3	257	0.906858
Lakies Anke	1967	VfL Oldesloe	124.34	259.98	0.896752
Möldner Antje	1984	SC Potsdam	124.34	248.81	0.93701
Zaituc Luminita	1968	LG Braunschweig	124.43	246.33	0.947129
Hartmann Karen	1970	SC Traktor Schwerin	124.47	249.45	0.935583
Beggerow Antje	1973	SC Empor Rostock	124.54	251.98	0.92671
Fischer Susanne	1968	SC Dynamo Berlin	124.54	252.69	0.924107
Kallabis Jolanda	2005	FT 1844 Freiburg	124.65	254.08	0.919863
Schwanz Annemarie	1993	SC Neubrandenburg	124.65	250.93	0.93141
Reinert Jana	1998	LG Region Karlsruhe	124.67	258.04	0.905892
Reinert, Jana	1998	LG Region Karlsruhe	124.67	258.04	0.905892
Trottnow Ann-Kristina	1976	LG VfB/Kickers Stuttgart	124.69	258.87	0.903132
Kleinau Regine	1946	SC DHfK Leipzig	124.7	247.6	0.944315
Wölpert Anette	1975	VfL Waiblingen	124.7	257.61	0.907622
Höfler, Petra	1966	TV Konstanz	124.7	267.96	0.872565
Witzmann Manuela	1970	SC Turbine Erfurt	124.71	256.79	0.910593
Coqui Eva-Christina	1968	LG Anger-Piding	124.8	261.04	0.896414
Pöhlitz Waltraud	1942	SC Chemie Halle	124.8	259.4	0.902082
Tüshaus Ursula	1961	TV Wattenscheid 01	124.84	260.13	0.899839
Hoffmann Vera	1996	LC Rehlingen	124.88	251.44	0.931236
Becker Juliane	1982	SC Berlin	124.94	260.57	0.899039
Meisl Verena	2001	LG Olympia Dortmund	124.96	253.86	0.92295
Nolte Sabine	1968	LG Göttingen	124.96	260.94	0.897908
Jarmuske Sabine	1959	TSC Berlin	125	259	0.904923
Theuss Bianca	1960	MSV Duisburg	125	256.21	0.914777
Weiss Sabine	1957	ASV Köln	125	256.27	0.914563
Wulsch Sigrid Elisabeth	1953	Bielefelder TG	125.12	255.02	0.919928
Biedermann Sarah	1991	LAC Erdgas Chemnitz	125.13	260.97	0.899026
Nöllgen Verena	1960	SC DHfK Leipzig	125.2	258.6	0.907773
Kick Julia	1990	LG Telis Finanz Regensburg	125.25	250.9	0.936005
Klaassen Lena	1991	TSV Bayer 04 Leverkusen	125.27	258.83	0.907473
Bibernell Ines	1965	SC Chemie Halle	125.4	245.64	0.957193
Dörre Katrin	1961	SC DHfK Leipzig	125.4	258.66	0.909012
Rottmüller, Anita	1942	Post SG Mannheim	125.4	267	0.880618
Themann Tabea	1992	SV Molbergen	125.47	254.55	0.924204
Deselaers Ines	1963	LAV Düsseldorf	125.49	251.47	0.935673
Haak Ute	1966	LAC Quelle Fürth	125.5	257.81	0.912736
Rößler Christine	1950	SC DHfK Leipzig	125.5	258.2	0.911357
FrankeI Sylvia	1955	SC Motor Jena	125.6	256.4	0.918487
Lehnich Rosemarie	1957	LAV Gütersloh	125.7	257.4	0.915647
Sauer Ursula	1960	SC Turbine Erfurt	125.7	252.6	0.933046
Kallabis, Jolanda	2005	FT 1844 Freiburg	125.75	261.44	0.901856
Kubasch, Stella	1992	Ratzeburger SV	125.75	261.83	0.900513
Sussmann Jana	1990	LG Nordheide	125.91	255.91	0.922517
General, Bente	1981	SG TSV Kronshagen/Kieler TB	125.95	267.49	0.88286
Ballner Ariane	1996	LG Elmshorn	125.98	258.95	0.912193
Wiesenberg Cathrin	1965	Tiefbau Cottbus	125.98	259.02	0.911947
Ballner, Ariane	1996	LG Elmshorn	125.98	258.95	0.912193
Gärtner Christiane	1964	SC Einheit Dresden	126.01	260.14	0.908237
Schulz Johanna	1994	SC Rönnau 74	126.08	253.47	0.932655
Schulz, Johanna Christine	1994	SC Rönnau 74	126.08	253.47	0.932655
Klaus, Jutta	1953	LC/USC Freiburg	126.1	261.8	0.903123
Horak Birgit	1963	LC Paderborn	126.13	253.25	0.933835
Weis Jeannette	1969	SC Turbine Erfurt	126.13	254.93	0.927681
Schmälzle, Alica	1993	LG Ortenau Nord	126.77	272.74	0.871503
Karstens, Verena	1975	Wellingdorfer TV	127.7	262.22	0.913117
Rosenplänter, Katja	1981	LC Rothaus Breisgau	128.11	260.96	0.920472
Pfüller, Antje	2002	LG Region Karlsruhe	128.64	258.81	0.931958
Haisch, Adeline	2000	LG Region Karlsruhe	128.66	272.18	0.886316
Theophil, Nicole	1968	LG Wedel/Pinneberg	128.74	260.96	0.924998
Hoffmann, Marliese	1942	Post SG Mannheim	128.8	268.7	0.898772
Peucker, Antje	1967	LG Wedel/Pinneberg	128.86	279.5	0.864445
Köninger, Sabine	1963	LG Ortenau Nord	128.9	269.7	0.896135
Müller, Ester	1992	TS Ottersdorf	129.13	276.41	0.875941
Eising, Annette	1965	Kaltenkirchener TS	129.2	280.8	0.862714
Schwede, Lara-Ann	1996	PTSV Jahn Freiburg	129.25	270.86	0.89472
Müller, Felizitas	1992	TS Ottersdorf	129.42	274.4	0.884339
Vetter, Heidrun	1961	TuS Neureut	129.5	260.29	0.932854
Beck, Ulrike	1961	TV Konstanz	129.59	257.43	0.943873
Weiß, Martina	1961	TSB Flensburg	129.9	287.6	0.846879
Rehberg, Maya	1994	SC Rönnau 74	130.07	257.54	0.946965
Braun, Susanne	1960	TV Konstanz	130.09	280.96	0.868162
Killius, Svenja	1985	SG TSV Kronshagen/Kieler TB	130.54	258.52	0.946784
Schneider, Barbara	1965	TB Emmendingen	130.88	275.8	0.889775
Seith, Bettina	1964	LG Karlsruhe	131.07	265.53	0.925531
Amrhein, Fabienne	1992	MTG Mannheim	131.12	269.04	0.913805
Hettich, Sarah	1991	LG Karlsruhe	131.14	269.37	0.912824
Zimmer, Anne	1982	LG Ortenau Nord	131.19	271.14	0.907211
Seiter, Sophia	2003	LG Region Karlsruhe	131.3	276.78	0.88947
Bartels, Astrid	1963	LG Wedel/Pinneberg	131.33	261.1	0.943101
Löffler, Sabine	1968	VfB Gaggenau	131.37	275.82	0.893042
Salt, Christa	1964	Karlsruher SC	131.38	276.08	0.892269
Moh, Susanne	1959	USC Heidelberg	131.4	269.1	0.915552
Wolfsperger, Christine	1967	TV Lahr	131.61	273.11	0.903551
Metzler, Verena	1973	LG Hegau-Bodensee	131.62	280.56	0.879625
Mess, Susanne	1969	LG Wedel/Pinneberg	131.68	275.1	0.897492
Klassen, Nathalie	1983	SG TSV Kronshagen/Kieler TB	131.83	288.31	0.857345
Zöller, Sabine	1960	TSG Akus Weinheim	131.9	280.2	0.882628
Jamrozy, Ute	1964	Polizei-SV Eutin	131.92	269.2	0.918834
Roelssen, Brigitte	1949	USC Heidelberg	132.1	275.6	0.898721
Huck, Inge	1955	LG LuK Steinbach-Bühl	132.4	268.7	0.923893
Ressing, Mareike	1970	LG Wedel/Pinneberg	132.4	262.16	0.946941
Gehring, Anna	1996	SC Itzehoe	132.5	262.28	0.947222
Richter, Christine	1964	Bramstedter TS	132.54	276.69	0.898162
Kölling, Jennifer	1985	LG Wedel/Pinneberg	132.6	273.64	0.908584
Budde, Adia	2005	TSV Altenholz	132.66	270.63	0.919105
Kieninger, Renate	1954	LG Offenburg	132.8	265.4	0.938206
Greve, Sigrid	1947	Büdelsdorfer TSV	132.92	295.6	0.843116
Merkel, Lisa	2003	LG Region Karlsruhe	132.95	264.49	0.942498
Walton, Vanessa	1989	TV 1892 Tiefenbronn	132.95	277.72	0.897599
Hegmann, Carmen	1970	SC Freudenberg	132.96	270.01	0.923299
von dem Berge, Claudia	1962	LG Wedel/Pinneberg	133.39	271.12	0.922493
Stocker, Tamara	1990	TG Stockach	133.53	275.24	0.909638
Müller, Irmgard	1950	SV Schapach	133.7	274.8	0.912254
Flügel, Monika	1958	TV Staufen	133.76	277	0.905415
Leiberich, Marion	1988	Karlsruher SC	133.86	280.92	0.893448
Hansen, Heidrun	1958	Kieler TB	134.2	279.9	0.898982
Hilschenz, Marina	1981	LG Wedel/Pinneberg	134.29	266.6	0.944463
Krog, Gesine	1971	LBV Phönix Lübeck	134.36	275.08	0.915824
Brocks, Heinke	1967	SV Friedrichsgabe	134.41	287.2	0.877503
Schöndorf, Tanja	1974	TSB Flensburg	134.72	284.6	0.887561
Czinczoll, Angela	1961	VfL Oldesloe	134.8	291.9	0.865879
Jakobs, Angela	1958	LBV Phönix Lübeck	134.8	276.2	0.915098
Reiser, Nicole	1970	LBV Phönix Lübeck	134.83	277.47	0.911112
Feuerherdt, Lisa	1990	SG TSV Kronshagen/Kieler TB	134.98	277.22	0.912948
Emmerich, Sabine	1971	MTV Heide	135.3	299.8	0.846189
Nielsen, Miriam	1973	TSB Flensburg	135.4	287.28	0.88372
Westphal, Nina	1972	TSB Flensburg	135.61	272.55	0.932925
Greinert, Sabine	1973	TSB Flensburg	135.69	279.11	0.911536
Liebler, Nina	1976	LG Wedel/Pinneberg	135.82	288.5	0.882712
Burmester-Schöler, Beate	1962	LBV Phönix Lübeck	136.24	274.2	0.931619
Dilba, Britta	1975	THW Kiel	136.24	295.4	0.86476
Schäfer, Marion	1965	TSV Glücksburg 09	136.6	298.88	0.856949
Heer, Irmtraut	1946	Ahrensburger TSV	136.7	290.2	0.883227
Steffen, Eva	1959	Büdelsdorfer TSV	137	282.2	0.910259
Andresen, Heike	1962	TSV Medelby	137.2	291.5	0.882504
Hirsch, Carmen	1956	LAV Husum	137.3	282.7	0.910638
Dietrichs, Ute	1968	Rendsburger TSV	137.32	281.7	0.914004
Wienecke, Julia	1985	LG Reinbek/Ohe	137.32	293.72	0.8766
Strothmann, Kristin	1964	LG Elmshorn	137.4	286.8	0.898274
Dethloff, Stefanie	1966	MTV Lübeck	137.74	281.8	0.916474
Witt, Birthe	1965	LBV Phönix Lübeck	138.2	299.8	0.864326
Ehler, Simone	1966	LAV Husum	138.4	286.2	0.906709
Müller, Urte	1967	LAV Husum	138.4	288.79	0.898577
Sievers, Leonie	1999	Ahrensburger TSV	138.57	289.29	0.898126
Oriwohl, Britta	1970	SV Großhansdorf	138.7	291.01	0.893655
Adler, Nicole	1992	SG TSV Kronshagen/Kieler TB	138.96	277.49	0.938953
Metz, Svenja	1983	WSV Tangstedt	138.99	288.96	0.901877

## Sheet: 1500-3000
name, first name	date or year of birth	nation or club	sec 1500m	sec 3000m	KsA
KIPYEGON Faith	1994-01-10	KENKEN	229.11	503.55	0.909979
DIBABA Genzebe	1991-02-08	ETHETH	230.07	501.29	0.917912
QU Yunxia	25 DEC 1972	CHNCHN	230.46	492.18	0.936487
WANG Junxia	1973-01-09	CHNCHN	231.92	486.11	0.954187
HASSAN Sifan	1993-01-01	NEDNED	231.95	498.49	0.93061
KAZANKINA Tatyana	17 DEC 1951	URSURS	232.47	502.62	0.925033
YIN Lili	1979-11-11	CHNCHN	233.91	521.05	0.897841
IVAN Paula	1963-07-20	ROUROU	233.96	507.15	0.922646
LAN Lixin	1979-02-14	CHNCHN	233.97	519.67	0.900456
TSEGAY Gudaf	1997-06-23	ETHETH	234.01	505.23	0.92635
DVIRNA Olga	1953-02-11	URSURS	234.23	516.4	0.907165
MUIR Laura	09 MAY 1993	GBRGBR	234.5	510.53	0.918653
HOULIHAN Shelby	1993-02-08	USAUSA	234.99	517.4	0.908349
DONG Yanmei	1977-02-16	CHNCHN	235.07	513.07	0.916327
CHIZHENKO Yuliya	1979-08-30	RUSRUS	235.68	524.6	0.898513
DEBUES-STAFFORD Gabriela	1995-09-13	CANCAN	236.12	518.51	0.910764
ZAYTSEVA Zamira	1953-02-16	URSURS	236.14	515.74	0.915733
JAMAL Maryam Yusuf	1984-09-16	BRNBRN	236.18	508.87	0.928253
HAILU Freweyni	2001-02-12	ETHETH	236.28	506.61	0.932789
ROWBURY Shannon	1984-09-19	USAUSA	236.29	509.93	0.926755
POZDNYAKOVA Tetyana	04 MAR 1956	URSURS	236.5	512	0.923828
RALLDUGINA Nadezhda	1957-11-15	URSURS	236.63	529.17	0.894344
MELINTE Doina	27 DEC 1956	ROUROU	236.7	517.11	0.915473
TOMASHOVA Tatyana	1975-07-01	RUSRUS	236.91	505.56	0.937218
SZABO Gabriela	1975-11-14	ROUROU	236.97	501.42	0.945196
GUSKOVA Svetlana	1957-08-19	URSURS	237.05	509.36	0.930776
OBIRI Hellen	13 DEC 1989	KENKEN	237.05	500.68	0.946912
PUICĂ Maricica	1950-07-29	ROUROU	237.22	507.83	0.93425
SIMPSON Jenny	1986-08-23	USAUSA	237.22	509.58	0.931041
HULL Jessica	22 OCT 1996	AUSAUS	237.29	511.81	0.927258
MARANGA Jackline	16 DEC 1977	KENKEN	237.41	518.02	0.916606
ZHANG Linli	06 MAR 1973	CHNCHN	237.46	496.5	0.956536
SACRAMENTO Carla	10 DEC 1971	PORPOR	237.71	510.22	0.931794
Wartenberg Christiane	1956	C Chemie Halle	237.71	539.4	0.881387
ZAKHAROVA Galina	1956-09-07	URSURS	237.72	513.4	0.926062
HOLMES Kelly	1970-04-19	GBRGBR	237.9	541.91	0.878006
COURTNEY-BRYANT Melissa	1993-08-30	GBRGBR	238.01	519.2	0.916834
MUGO Naomi	1977-01-02	KENKEN	238.12	523.55	0.909636
MĂRĂŞESCU Natalia	03 OCT 1952	ROUROU	238.2	513.53	0.927697
WEYERMANN Anita	08 DEC 1977	SUISUI	238.2	515.83	0.92356
ABEYLEGESSE Elvan	1982-09-11	TURTUR	238.28	511.94	0.93089
AGLETDINOVA Ravilya	1960-02-10	URSURS	238.4	526.86	0.904984
REEKIE Jemma	06 MAR 1998	GBRGBR	238.65	564.81	0.845063
Körner Hildegard	1959	SC Turbine Erfurt	238.67	572.4	0.833927
KREMLYOVA Lyubov	21 DEC 1961	RUSRUS	238.71	526.94	0.906023
ULMASOVA Svetlana	1953-02-04	URSURS	238.76	506.78	0.942263
BURKA Gelete	1986-01-23	ETHETH	238.79	505.92	0.943983
EMBAYE Axumawit	18 OCT 1994	ETHETH	238.8	523.83	0.911746
O'SULLIVAN Sonia	1969-11-28	IRLIRL	238.85	501.64	0.952277
CRANNY Elise	09 MAY 1996	USAUSA	238.88	509.95	0.936876
KLOSTERHALFEN Konstanze	1997-02-18	GERGER	238.92	500.07	0.955546
ROMANOVA Giana	10 MAR 1955	URSURS	239.01	521.8	0.916098
YORDANOVA Daniela	08 MAR 1976	BULBUL	239.1	510.59	0.936564
ARTYOMOVA Natalya	1963-01-05	URSURS	239.16	511.67	0.934821
TANAKA Nozomi	1999-09-04	JPNJPN	239.19	520.84	0.918478
CHOJECKA Lidia	1977-01-25	POLPOL	239.22	511.69	0.935019
KIBIWOT Viola Jelagat	22 DEC 1983	KENKEN	239.25	504.41	0.948633
YEGOROVA Olga	28 MAR 1972	RUSRUS	239.47	503.26	0.951675
SIPATOVA Yelena	1955-06-07	URSURS	239.48	513.53	0.932682
DOBRISKEY Lisa	23 DEC 1983	GBRGBR	239.5	534.12	0.896802
RODRÍGUEZ Natalia	1979-06-02	ESPESP	239.51	515.86	0.928585
ZHANG Li-rong	03 MAR 1973	CHNCHN	239.7	501.84	0.955285
DEHIBA CHAHYD Hind	17 MAR 1979	FRAFRA	239.76	532.21	0.900998
KOSTER Maureen	1992-07-03	NEDNED	239.79	515.93	0.929545
SMEKHNOVA Raisa	1950-09-16	URSURS	239.8	521.77	0.919179
TURAVA Alesia	06 DEC 1979	BLRBLR	239.89	512.89	0.935444
Liebich Beate	1958	SC Turbine Erfurt	239.9	540.93	0.886991
BRUNS Ulrike	1953-11-17	GDRGDR	239.9	516.38	0.929161
BÜRKI Cornelia	03 OCT 1953	SUISUI	239.9	518.71	0.924987
ZAUBER Angelika	1958-11-05	GDRGDR	239.9	529.61	0.90595
ZADOROZHNAYA Yelena	03 DEC 1977	RUSRUS	239.94	505.4	0.949505
PARRY-TULLETT Hayley	1973-02-17	GBRGBR	239.95	525.39	0.913417
BUDD Zola	26 MAY 1966	GBRGBR	239.96	508.83	0.943183
SCHWEIZER Karissa	04 MAY 1996	USAUSA	240.02	520.25	0.92271
LANGE-HAHMANN Andrea	1966-06-03	GDRGDR	240.07	530.94	0.904321
BELETE Mimi	1988-06-09	BRNBRN	240.08	510	0.94149
WEIGHTMAN Laura	1991-07-01	GBRGBR	240.09	506.07	0.948841
NIKITINA Irina	1961-06-16	URSURS	240.18	525.7	0.913753
FERNÁNDEZ Nuria	1976-08-16	ESPESP	240.2	518.05	0.927324
YUSHINA Alla	1958-08-20	URSURS	240.26	514.02	0.934827
WILLIAMS Lynn	1960-07-11	CANCAN	240.27	517.3	0.928939
HAILU Lemlem	25 MAY 2001	ETHETH	240.32	509.43	0.943486
JACOBS Regina	1963-08-28	USAUSA	240.35	519.56	0.925206
BAHTA Meraf	1989-06-24	SWESWE	240.49	517.5	0.92943
WAITZ Grete	01 OCT 1953	NORNOR	240.55	511.75	0.940107
CAHILL Christina	25 MAR 1957	GBRGBR	240.57	529.89	0.908
OUAZIZ Zahra	20 DEC 1969	MARMAR	240.6	506.48	0.950087
BOBOROVA Natalya	1959-02-12	URSURS	240.62	528.31	0.910905
ALAOUI SELSOULI Mariem	1984-04-08	MARMAR	240.77	509.52	0.945086
SMOLKA Lyubov	1952-11-29	URSURS	240.8	516	0.933333
ROMANOVA Yelena	20 MAR 1963	URSURS	240.91	510.45	0.943912
MCCOLGAN Eilish	1990-11-25	GBRGBR	240.97	511	0.943131
GEZAHEGNE Kalkidan	08 MAY 1991	BRNBRN	240.97	514.65	0.936442
CLITHEROE Helen	1974-01-02	GBRGBR	241.1	531.82	0.906698
GASSER Sandra	1962-07-27	SUISUI	241.1	534.13	0.902776
MURRAY Yvonne	04 OCT 1964	GBRGBR	241.2	509.02	0.947703
MÄKI Kristiina	1991-09-22	CZECZE	241.23	531.69	0.907408
CHEBET Brenda	16 MAR 2004	KENKEN	241.25	524.08	0.920661
CHERONO Mercy	07 MAY 1991	KENKEN	241.26	501.14	0.962845
BENTHAMI-GHEZIELLE Bouchra	19 MAY 1979	FRAFRA	241.28	515.41	0.936264
BRAGINA Lyudmila	1943-07-24	URSURS	241.38	507.12	0.951964
MCCOLGAN Liz	24 MAY 1964	GBRGBR	241.38	518.23	0.931555
daFonseca-Wollheim Kristina	1972	SV Halle	241.42	517.3	0.933385
DA FONSECA-WOLLHEIM Kristina	1972-02-10	GERGER	241.42	517.3	0.933385
NELYUBOVA Olga	1964-07-12	RUSRUS	241.42	527.9	0.914643
WAMI Gete	11 DEC 1974	ETHETH	241.47	507.62	0.951381
GRUNEWALD Gabriele	1986-06-25	USAUSA	241.48	522.64	0.924078
BENNING Christine	30 MAR 1955	GBRGBR	241.53	524.46	0.921062
KRAUS Brigitte	1956-08-12	FRGFRG	241.54	515.11	0.937819
Kraus Brigitte Helene	1956	ASV Köln	241.54	515.11	0.937819
CHALMERS Angela	1963-09-06	CANCAN	241.61	512.17	0.943476
KOBA Tamara	1957-02-24	URSURS	241.66	527.99	0.915396
LI Ying	1975-06-24	CHNCHN	241.71	522.39	0.925401
HEALY Sarah	2001-02-13	IRLIRL	241.75	526.14	0.918957
SAMUEL Alemaz	1999-07-05	ETHETH	241.78	517.68	0.934091
TOBIAS Nataliya	1980-11-22	UKRUKR	241.78	531.32	0.910111
PAVEY Joanne	1973-09-20	GBRGBR	241.79	511.27	0.945841
GRAHAM Yvonne	1965-08-22	JAMJAM	241.84	517.07	0.935425
TEFERI Senbere	03 MAY 1995	ETHETH	241.86	512.49	0.943862
BABCOCK Courtney	1972-06-30	CANCAN	241.99	523.18	0.925074
DEFAR Meseret	1983-11-19	ETHETH	242	504.51	0.959347
JEBITOK Edinah	2001-11-10	KENKEN	242	522.34	0.9266
CHURBANOVA Olga	1965-07-16	RUSRUS	242.1	520.48	0.930295
BORISOVA Lyudmila	1966-08-03	RUSRUS	242.13	520.78	0.929874
MEYER Elana	10 OCT 1966	RSARSA	242.15	512	0.945898
MÅKESTAD BOVIM Ingvill	1981-08-07	NORNOR	242.2	534.57	0.906149
KRUMINS Susan	1986-07-08	NEDNED	242.25	514.41	0.941856
KOMYAGINA Olga	1974-02-10	RUSRUS	242.32	522.58	0.927399
ZHURAVLYOVA Olga	1956	URSURS	242.33	532.2	0.910673
VASILYEVA Lyudmila	20 OCT 1969	RUSRUS	242.45	532.98	0.90979
TWELL Stephanie	1989-08-17	GBRGBR	242.54	520.98	0.931091
KLEIN Hanna	1993-04-06	GERGER	242.58	525	0.924114
JELAGAT Irene	10 DEC 1988	KENKEN	242.59	508.51	0.954121
MERRILL Janice	1956-06-18	USAUSA	242.61	522.6	0.928473
GEGA Luiza	1988-11-05	ALBALB	242.63	526.61	0.921479
MAI Yvonne	1965-08-22	GDRGDR	242.69	532.78	0.911033
GHICAN Viorica	1965-06-09	ROUROU	242.76	522.39	0.929421
CHECA Dolores	27 DEC 1982	ESPESP	242.77	517.78	0.937734
MARUSOVA Margarita	1967-11-25	RUSRUS	242.86	524.26	0.926487
OehmeHeike	1963	SC Cottbus	242.9	553.74	0.877307
BELOUSOVA Raisa	1952-02-29	URSURS	242.9	524.7	0.925862
RUNYAN Marla	1969-01-04	USAUSA	242.95	519.36	0.935575
REID Sheila	1989-08-02	CANCAN	242.96	524.02	0.927293
BRUNET Roberta	20 MAY 1965	ITAITA	243.01	515.65	0.942539
MIŠMAŠ ZRIMŠEK Maruša	24 OCT 1994	SLOSLO	243.05	526.44	0.923372
GRØVDAL Karoline Bjerkeli	1990-06-14	NORNOR	243.07	513.47	0.946774
FRANKIEWICZ Wioletta	1977-06-09	POLPOL	243.09	524.22	0.927435
LEHMANN-VEITH Gabriele	24 OCT 1956	GDRGDR	243.1	532.6	0.91288
WYETH Alison	26 MAY 1964	GBRGBR	243.17	518.42	0.93812
PLIŚ Renata	1985-02-05	POLPOL	243.5	519.18	0.938018
SZALAI Katalin	04 MAR 1961	HUNHUN	243.51	531.5	0.916312
VAN HULST Elly	1959-06-09	NEDNED	243.63	513.97	0.948032
MEZULIÁNÍKOVÁ Diana	1992-04-10	CZECZE	243.7	533.72	0.913213
ROMANOVA Andzhela	06 MAY 1961	URSURS	243.7	528.54	0.922163
JUDD Jess	1995-01-07	GBRGBR	243.73	532.73	0.915023
THOMAS Charlene	06 MAY 1982	GBRGBR	243.74	551.07	0.884606
BRZEZIŃSKA Anna	1971-01-09	POLPOL	243.75	524.05	0.930255
SHOBUKHOVA Liliya	1977-11-13	RUSRUS	243.78	514.85	0.946994
CRUCIATA Silvana	1953-02-15	ITAITA	243.88	526.8	0.925892
BARTH Birgit	1962-06-19	GDRGDR	243.9	531.04	0.918575
FIDATOV Elena	1960-07-24	ROUROU	243.92	521.98	0.934595
SLY Wendy	1959-11-05	GBRGBR	244.14	517.06	0.944339
Friedrich Kathleen	1977	LAC Erdgas Chemnitz	244.27	557.48	0.876336
Michallek Vera	1958	LG Frankfurt	244.29	527.62	0.926007
Harrer Corinna	1991	LG TF Regensburg	244.3	535.47	0.912469
BARANOVA Lyudmila	1950	URSURS	244.36	530.63	0.921018
BESLIU-IONESCU Iulia	1965-07-03	ROUROU	244.36	521.54	0.937071
GERDES Roswitha	1961-06-28	FRGFRG	244.41	534.6	0.914366
Pfeiffer Astrid	1964	SC Dynamo Berlin	244.42	548.64	0.891003
KIESSLING Ellen	1968-02-17	GDRGDR	244.44	526.99	0.927684
KOROBKINA Yelena	1990-11-25	RUSRUS	244.54	531	0.921055
YATSINSKA Vesela	1951-01-16	BULBUL	244.7	532.89	0.918388
BITZNER-DUCRET Blandine	01 DEC 1965	FRAFRA	244.72	533.99	0.916571
KUZYUKOVA Olga	17 MAY 1953	URSURS	244.77	518.22	0.944657
DOMÍNGUEZ Marta	1975-11-03	ESPESP	244.84	508.8	0.962421
HOLOVCHENKO Tetyana	1980-02-13	UKRUKR	245.01	530.67	0.923399
DEJAEGHERE Veerle	1973-08-01	BELBEL	245.05	529.31	0.925922
PANTYUKOVA Mariya	1974-08-14	RUSRUS	245.1	510.18	0.960837
Bletsch Yvette	1965	SC Karl-Marx-Stadt	245.12	571.6	0.857663
POSSAMAI Agnese	1953-01-17	ITAITA	245.14	517.96	0.94656
YAPEYEVA Nina	1956-01-03	URSURS	245.2	520.4	0.942352
KESZEG Margareta	1965-08-31	ROUROU	245.29	519.94	0.943532
BRIAND-CALENIC Dorina	1969-04-04	ROUROU	245.35	532.52	0.921468
RADCLIFFE Paula	17 DEC 1973	GBRGBR	245.37	502.2	0.97718
APLACHKINA Svetlana	1992-11-28	ANAANA	245.51	519.95	0.94436
Granz Caterina	1994	LG Nord Berlin	245.6	553.02	0.888214
SUJEW Diana	1990-11-02	GERGER	245.62	527.68	0.930943
Bibernell Ines	1965	SC Chemie Halle	245.64	529.8	0.927293
NUTTALL Hannah	1997-07-07	GBRGBR	245.66	568.62	0.864057
SADREYDINOVA Raisa	09 MAY 1950	URSURS	245.8	521.05	0.94348
Friedmann Birgit	1960	Eintracht Frankfurt	245.9	523.65	0.939177
Kühnemund Sylvia	1974	SV Halle	245.96	573.59	0.857616
Krebs Denise	1987	TV Wattenscheid 01	246.01	550.08	0.894452
Mikitenko Irina	1972	LG Eintracht Frankfurt	246.08	510.39	0.964282
Strotzer Waltraud	1952	SC Motor Jena	246.14	549.4	0.896032
WALCOTT-NOLAN Revee	06 MAR 1995	GBRGBR	246.23	553.36	0.889945
Zaituc Luminita	1968	LG Braunschweig	246.33	533.72	0.923068
Burkard Elena	1992	LG farbtex Nordschwarzwald	246.51	520.46	0.947277
Krott Martina-Agnes	1958	LAV Bayer Uerdingen/Dorm.	247	568.32	0.869229
BELL Alexandra	1992-11-04	GBRGBR	247.06	561.95	0.879295
Benfares Sara	2001	LC Rehlingen	247.3	536.36	0.922142
Sujew Elina	1990	SC Potsdam	247.36	537.56	0.920307
Kock Maren	1990	LG TF Regensburg	247.56	530.12	0.933977
CLARKE Rosie	1991-11-17	GBRGBR	247.69	531.02	0.932884
WOOTTON Katrina	1985-09-02	GBRGBR	247.94	543.87	0.911762
NICHOLSON-HARTIGAN Beverley	1967-06-10	GBRGBR	247.98	552.64	0.897438
Schmidt Birgit-Maria	1963	LC Paderborn	248.19	532.39	0.932362
DAINTY Gillian	1958-11-24	GBRGBR	248.7	548.96	0.906077
Möldner Antje	1984	SC Potsdam	248.81	540.74	0.920257
Bruns Anne	1974	LAV Meppen 91	249.12	574	0.868014
OCKENDEN Verity	1991-08-31	GBRGBR	249.34	546.54	0.912431
YORK Lisa	10 MAR 1970	GBRGBR	249.34	527.71	0.944989
SMITH Joyce	26 OCT 1937	GBRGBR	249.37	537.39	0.928078
Hartmann Karen	1970	Schweriner SC	249.45	547.67	0.91095
HARGRAVE-HUTCHESON Karen	1965-09-23	GBRGBR	249.46	528.72	0.943637
GRIFFITHS Amy	22 MAR 1996	GBRGBR	249.71	556.57	0.897317
da Fonseca-Wollheim, Kristina	1972	LG Offenburg	249.85	558.05	0.895439
PALLANT Emma	1989-06-04	GBRGBR	249.96	547.28	0.913463
YULE Penny	07 MAY 1949	GBRGBR	250.03	548.06	0.912418
Meyer Lea	1997	ASV Köln	250.06	542.25	0.922305
Hoffmann Katje	1971	SCC Berlin	250.12	536.73	0.932014
FULLERTON Faye	31 MAY 1984	GBRGBR	250.24	547.52	0.914085
PARKINSON-OVENS Hayley	05 DEC 1975	GBRGBR	250.34	554.88	0.902321
Leist Sabine	1966	SC Traktor Schwerin	250.39	546	0.917179
MOULTRIE Josephine	1990-11-19	GBRGBR	250.43	557.43	0.898516
CLAY Bobby	19 MAY 1997	GBRGBR	250.61	553.97	0.904778
Coutellier Vera	1995	ASV Köln	250.71	548.5	0.914166
Walter Doreen	1976	LAC Erdgas Chemnitz	250.8	553.9	0.905579
Friedmann, Ursula	1971	LG Offenburg	250.81	582.17	0.861638
Karhoff Andrea	1974	ASV Köln	250.89	536.79	0.934779
Kick Julia	1990	LG Telis Finanz Regensburg	250.9	562.89	0.891471
Horna Annett	1987	LC Rehlingen	250.98	573.66	0.875013
Hoffmann Vera	1996	LC Rehlingen	251.44	552.27	0.910569
Deselaers Ines	1963	LAV Düsseldorf	251.47	571.23	0.880451
Schwarzbauer Gabriele	1968	MTV 1881 Ingolstadt	251.48	545.67	0.921729
FURNISS Jane	1960-08-23	GBRGBR	251.51	525.69	0.956876
INGLIS Sarah	1991-08-28	GBRGBR	251.51	566.02	0.888697
PARKER Barbara	1982-11-08	GBRGBR	251.52	538.62	0.933942
PARKER-LAMB Susan	24 MAR 1970	GBRGBR	251.57	562.45	0.894551
MILLARD Alexandra	31 DEC 2001	GBRGBR	251.67	542.8	0.927303
GAULD Nicola	28 MAR 1982	GBRGBR	251.8	544.21	0.925378
GILIBRAND Kerry	1976-09-13	GBRGBR	251.8	565.08	0.891201
DERING Jo	1969-02-07	GBRGBR	251.85	539.45	0.933729
Metzner Claudia	1966	BV Teutonia Lanstrop	251.99	543.41	0.92744
Biba Iris Gerda	1964	LAZ Main-Kinzig	252.07	534.99	0.942335
NEWPORT DAVIES Angela	21 OCT 1970	GBRGBR	252.09	548.12	0.919835
BELL Georgia	17 OCT 1993	GBRGBR	252.16	546.63	0.922598
MCGEORGE Sonia	1964-11-02	GBRGBR	252.16	531.33	0.949165
QUIRK Amelia	18 DEC 1999	GBRGBR	252.19	551.2	0.915058
BULL Sarah	1975-06-04	GBRGBR	252.21	558.11	0.9038
BROOKS Hannah	1988-06-25	GBRGBR	252.27	551.86	0.914254
GIBSON Lynn	1969-07-06	GBRGBR	252.32	564.6	0.893801
Schulz Melanie	1979	SV Creaton Großengottern	252.42	536.46	0.941058
WHITTLE Laura	1985-06-27	GBRGBR	252.48	530.37	0.95209
PRATT Aimee	03 OCT 1997	GBRGBR	252.52	524.15	0.963541
Merten Christa	1944	SV Bayer 04 Leverkusen	252.6	560.6	0.901177
Sauer Ursula	1960	SC Turbine Erfurt	252.6	537.59	0.93975
Fischer Susanne	1968	SC Dynamo Berlin	252.69	557.04	0.90726
Franzis Elisabeth	1962	SV Sonsbeck 1919	252.7	545.7	0.92615
MORLEY Suzanne	11 OCT 1957	GBRGBR	252.79	536.39	0.94256
Fleischer Andrea	1963	SC Motor Jena	252.93	548.49	0.922278
Heim Thea	1992	LG Telis Finanz Regensburg	252.94	560.41	0.902696
WALSH Jennifer	1993-02-22	GBRGBR	252.96	557.4	0.907643
Reh Alina	1997	SSV Ulm 1846	253.11	528.05	0.958659
NESBITT Jennifer	1995-01-24	GBRGBR	253.12	539.86	0.937725
Schäning Anke	1970	SC Traktor Schwerin	253.15	532.01	0.951674
FELTON Rachel	1979-06-27	GBRGBR	253.19	563	0.899432
Hermann Katharina	1952	SC Einheit Dresden	253.2	541.8	0.934662
HILL Jenna	16 OCT 1985	GBRGBR	253.24	561.93	0.901322
Neuhaus Beatrix	1963	MC Menden	253.32	545.49	0.92878
Oppat Manuela	1963	SC Dynamo Berlin	253.33	570.71	0.887771
WARD Emma	1982-01-02	GBRGBR	253.38	567.63	0.892765
Schulz, Johanna Christine	1994	SC Rönnau 74	253.47	596.38	0.850029
Koubaa Sanaa	1985	TSV Bayer 04 Leverkusen	253.48	560.65	0.904236
Mann Sabine	1965	ASV Köln	253.53	547.85	0.925545
KERSEY Gemma	1992-02-06	GBRGBR	253.54	550.48	0.92116
REED Kate	1982-09-28	GBRGBR	253.55	541.17	0.937044
PIDGEON Emily	1989-06-01	GBRGBR	253.56	546.87	0.927314
Kukel Monika	1966	ASK Vorwärts Potsdam	253.66	546.27	0.928698
WHITMORE Hannah	1984-02-24	GBRGBR	253.72	555.65	0.913237
MORRIS Nicky	13 MAR 1962	GBRGBR	253.74	539.46	0.940718
KRZYWICKI Tara	09 MAR 1974	GBRGBR	254.06	559.1	0.908818
THACKERY Calli	1993-01-09	GBRGBR	254.08	528.1	0.962242
STOCKTON Stevie	1989-08-23	GBRGBR	254.11	540.67	0.939982
PARKINSON Amanda	1971-07-21	GBRGBR	254.19	567.59	0.895682
HOLT Kate	1992-09-07	GBRGBR	254.36	544.82	0.93374
BARNES Stephanie	1988-07-28	GBRGBR	254.37	555.58	0.915692
Teske Charlotte	1949	ASC Darmstadt	254.38	538.05	0.945563
HOSKER-THORNHILL Emily	27 OCT 1992	GBRGBR	254.4	555.37	0.916146
ARTER Charlotte	1991-06-18	GBRGBR	254.41	538.48	0.944919
FAIRCHILD Jacqueline	03 MAY 1989	GBRGBR	254.43	559.9	0.908841
BRADFORD Carole	1961-11-03	GBRGBR	254.44	546.3	0.931503
KIDGER Beth	16 MAR 1994	GBRGBR	254.52	546.29	0.931813
Themann Tabea	1992	SV Molbergen	254.55	555.61	0.91629
Heuing Mathilde	1952	LG Gütersloh	254.67	555.9	0.916244
Pippig Uta	1965	SCC Berlin	254.8	520.99	0.978138
Jerschabek Birgit	1969	Schweriner SC	254.81	545.04	0.935014
Vetter Heidrun	1961	TSV Genkingen	254.86	550.62	0.92572
KNOWLES-JONES Harriet	1998-04-03	GBRGBR	254.95	554.86	0.918971
BARNES Danielle	08 OCT 1985	GBRGBR	255	564.4	0.903614
YELLING Liz	05 DEC 1974	GBRGBR	255.01	551.04	0.925559
Wulsch Sigrid Elisabeth	1953	Bielefelder TG	255.02	540.15	0.944256
Eckhardt Uta Maria	1967	Eintracht Frankfurt	255.07	562.1	0.907561
Kunkel Sabine	1964	VfL Wolfsburg	255.07	538.54	0.947265
BERRY Catherine	08 OCT 1975	GBRGBR	255.16	536.44	0.951309
GUNNING Deborah	1965-08-31	GBRGBR	255.2	556.06	0.917887
DUCK Claire	1985-08-29	GBRGBR	255.27	551.26	0.926133
WAITE Lennie	1986-02-04	GBRGBR	255.33	560.88	0.910462
CHATTENTON Dani	1996-07-04	GBRGBR	255.35	558.64	0.914184
GORECKA Emelia	1994-01-29	GBRGBR	255.38	535.11	0.954495
AVERY Kate	10 OCT 1991	GBRGBR	255.42	536.24	0.952633
Lichtenfeld Yvonne	1969	SC Chemie Halle	255.46	548.47	0.931537
SPARKE Jessica	26 DEC 1987	GBRGBR	255.5	548.49	0.931649
MCNIVEN Ella	2001-09-04	GBRGBR	255.61	569.76	0.897255
MURRAY Freya	1983-09-20	GBRGBR	255.85	548.97	0.932109
Sussmann Jana	1990	LT Haspa-Marathon Hamburg	255.91	546.35	0.936799
KIRK Elinor	1989-04-26	GBRGBR	255.93	552.5	0.926443
PENNYCOOK Stephie	1995-09-01	GBRGBR	255.94	561.83	0.911094
STONE Philippa	1998-04-01	GBRGBR	255.98	556.48	0.919997
Jeorgakopulos Caroline	1969	LG HNF Hamburg	256.01	549.88	0.931149
Restle Simret	1984	LG Eintracht Frankfurt	256.07	545.99	0.938003
Winkelmann Antje Petra	1965	LG Göttingen	256.09	540.03	0.948429
Schulz Klara-Gudrun	1961	LAZ bellanett Rhede	256.13	560.87	0.913331
HENAGHAN Dianne	1965-08-06	GBRGBR	256.19	554.24	0.924473
Theuss Bianca	1960	MSV Duisburg	256.21	567.21	0.903404
COLLERAN Joanne	1972-09-01	GBRGBR	256.24	568.84	0.900921
Weiss Sabine	1957	LG Bayer Leverkusen	256.27	558.85	0.917133
GILLESPIE Kathryn	1996-09-27	GBRGBR	256.29	567.66	0.90297
TASCHIMOWITZ Naomi	19 OCT 1989	GBRGBR	256.32	552.66	0.927587
FrankeI Sylvia	1955	SC Motor Jena	256.4	559	0.917352
Hofmann Elvira	1961	TV Bad Mergentheim	256.4	547.4	0.936792
Benfares Selma	1999	LC Rehlingen	256.41	557.03	0.920633
Nußbeck Sylvia	1977	TSV Bayer 04 Leverkusen	256.42	548.04	0.935771
BROWN Tina	1976-08-22	GBRGBR	256.42	550.54	0.931522
Köster Dörte	1973	SC Empor Rostock	256.45	544.68	0.941654
DAVIES Angharad	1991-11-27	GBRGBR	256.49	556.62	0.921598
COWARD Lilly	1996-09-10	GBRGBR	256.5	560.18	0.915777
HESLOP Justina	03 MAR 1979	GBRGBR	256.51	547.62	0.936818
BLEASDALE Julia	1981-09-09	GBRGBR	256.56	526.38	0.974809
DEAN Hatti	1982-02-02	GBRGBR	256.57	538.77	0.952429
Dattke Miriam	1998	LG Telis Finanz Regensburg	256.59	539.24	0.951673
Wassiluk Petra	1969	ASC Darmstadt	256.62	539.56	0.95122
Breitenbach Anke	1969	LG Bayer Leverkusen	256.65	547.1	0.93822
Greschner Monika	1955	Jugend 07 Bergheim	256.7	553.8	0.927049
Mödl Maria	1954	MTV 1881 Ingolstadt	256.8	565	0.909027
Hain Jeanette	1966	SC Dynamo Berlin	256.85	545.55	0.941619
DEADMAN Lauren	27 MAR 1984	GBRGBR	256.89	555.08	0.925596
STEWART Emily	24 DEC 1991	GBRGBR	256.91	556.31	0.923622
Klein-Arndt Melanie	1975	ASC Rosellen Neuss	257	572.27	0.898177
BAKER Eleanor	11 DEC 1983	GBRGBR	257.05	550.34	0.93415
FRY Izzy	04 MAY 2000	GBRGBR	257.07	536.93	0.957555
Teegen Isabell	1993	SC Rönnau 74	257.17	552.8	0.930427
KEITH Megan	2002-04-23	GBRGBR	257.26	532.51	0.966217
Roggel Anja	1995	LAV Bayer Uerding./Dormagen	257.27	566.25	0.90868
TAIT Sarah	26 MAR 2001	GBRGBR	257.3	563.01	0.914016
Lenske Gerlinde	1979	LG SV Rülzheim	257.33	571.49	0.900558
WALKER Eloise	27 MAY 2001	GBRGBR	257.36	529.56	0.971977
Beck Ulrike	1961	TV Konstanz	257.43	537.95	0.957078
Beck, Ulrike	1961	TV Konstanz	257.43	537.95	0.957078
MCGHEE Abbey	02 MAR 1990	GBRGBR	257.49	569.5	0.904267
Lehmann Eva-Maria	1958	SCC Berlin	257.5	561.48	0.917219
HARVEY Joanne	1989-09-27	GBRGBR	257.51	553.58	0.930344
Wölm Christiane	1965	LGO Euskirchen/Erftstadt	257.53	566.31	0.909502
Rehberg Maya	1994	SG TSV Kronshagen/Kieler TB	257.54	555.39	0.92742
Rehberg, Maya	1994	SG TSV Kronshagen/Kieler TB	257.54	555.39	0.92742
Bartels Astrid	1963	LG Nord-West Hamburg	257.61	562.29	0.916289
Merten Silvia	1967	Barmer TV 1846 Wuppertal	257.75	558.89	0.922364
Hirscher Kerstin	1989	LAC Quelle Fürth	257.78	553.26	0.931858
Hüls Annette	1966	TV 1860 Detmold	257.79	553.67	0.931205
Haak Ute	1966	LAC Quelle Fürth	257.81	560.98	0.919142
Kullmann Angelika	1956	TV Mettmann	257.9	566.5	0.910503
TURTLE Gemma	15 MAY 1986	GBRGBR	257.91	554.8	0.92974
MORRIS Sophie	05 DEC 1975	GBRGBR	258.02	550.44	0.937505
CARTER Kathy	1959-02-24	GBRGBR	258.03	537.02	0.96097
Dietz Maria	1996	LAC Quelle Fürth	258.03	560.4	0.920878
ELLIOTT Lucy	09 MAR 1966	GBRGBR	258.07	559.02	0.923294
JOEL Alexa	1983-09-19	GBRGBR	258.19	555.97	0.928791
Huber Maika	1970	SC Traktor Schwerin	258.19	555.44	0.929677
CHAPMAN Sarah	1998-04-21	GBRGBR	258.21	557.03	0.927095
Pingpank Svenja	1996	Hannover Athletics	258.23	557.26	0.926785
WHITCOMBE-GREEN Andrea	1971-06-08	GBRGBR	258.24	553.81	0.932594
Kleffel Heike	1958	SC Motor Jena	258.3	560.1	0.922335
Theophil Nicole	1968	LG Bayer Leverkusen	258.37	571.46	0.904245
Thieke Stephanie	1986	LG Emstal Dörpen	258.42	562.73	0.918451
Ranz Gerda	1944	TV Erkheim	258.5	560.2	0.922885
Schlichtherle Susanne	1961	TSV Bad Wörishofen	258.51	569.22	0.908296
Killius, Svenja	1985	SG TSV Kronshagen/Kieler TB	258.52	592.55	0.872568
POTTER Elizabeth	27 DEC 1991	GBRGBR	258.54	555.76	0.930402
Dörre Katrin	1961	SC DHfK Leipzig	258.66	544.01	0.950938
POTTER-DOYLE Juliet	24 OCT 1981	GBRGBR	258.7	550.78	0.939395
Mewis Petra	1956	TSC Berlin	258.7	569.4	0.908676
JOHNSON Rebecca	1995-02-06	GBRGBR	258.71	558.89	0.925799
GIBSON Ashley	01 MAR 1986	GBRGBR	258.72	563.03	0.919027
ASTIN Sarah	22 OCT 1993	GBRGBR	258.75	536.59	0.964423
COULSON Jessica	1990-04-18	GBRGBR	258.75	551.28	0.938724
Kley Kathrin	1968	SC Turbine Erfurt	258.75	550.57	0.939935
HOOD Sara	1982-06-09	GBRGBR	258.81	562.84	0.919657
Pfüller Antje	2002	LG Region Karlsruhe	258.81	569.97	0.908153
Pfüller, Antje	2002	LG Region Karlsruhe	258.81	583.99	0.886351
Maisch Ulrike	1977	1.LAV Rostock	258.94	560.79	0.923483
INGMAN Jilly	1978-08-17	GBRGBR	259.03	552.37	0.937886
Jäsert Lisa	1992	SC Magdeburg	259.06	566.1	0.915245
ANKIER Joanna	1982-08-05	GBRGBR	259.09	546.76	0.947728
PURDUE Charlotte	1991-06-10	GBRGBR	259.13	551.54	0.93966
Stief Christine	1971	LAC Quelle Fürth/München	259.19	556.12	0.932137
TARVER Sophie	10 MAY 1998	GBRGBR	259.23	563.08	0.920757
Geukes Nicole	1969	DJK Lowick	259.38	567.41	0.91426
Danner Christiane	1988	LG Telis Finanz Regensburg	259.47	570.03	0.910373
MAYOCK Charlotte	11 DEC 1973	GBRGBR	259.5	565.58	0.917642
SNOW Linzi	1987-06-08	GBRGBR	259.57	561.1	0.925218
Hodey Gudrun	1947	VfL Eintracht Hagen	259.61	557.6	0.931169
Mauer Birgit	1963	SC Cottbus	259.61	556.19	0.93353
Hiller Julia	1987	LAC Quelle Fürth/München	259.63	553.82	0.937597
Manz Veronika	1959	Salamander Kornwestheim	259.68	569.7	0.911638
Janhsen Frieda	1965	VfL Ockenhausen	259.7	559.95	0.927583
WRIGHT Lucy	1969-11-17	GBRGBR	259.71	556.01	0.934192
Wolf Kathrin	1966	LAC Quelle Fürth/München	259.74	551.16	0.942521
Möckel Uta	1964	SC Motor Jena	259.79	562	0.92452
Böker Stefanie	1957	Bielefelder TG	259.8	559.62	0.928487
Knetsch Sabine Charlotte	1966	LG Bayer Leverkusen	259.82	558.73	0.930038
Schenk Anette	1966	LG Bayer Leverkusen	259.85	567.59	0.915626
Ader Angelika	1956	SC Traktor Schwerin	259.9	574.3	0.905102
Bühler Sigrid	1979	TSV Bayer 04 Leverkusen	259.94	571.1	0.910313
Finke Christiane	1962	LG Göttingen	259.96	550.13	0.945086
SAMUELS Amelia	09 MAY 2001	GBRGBR	259.97	569.17	0.913506
Mai Christina Angela	1961	LG Olympia Dortmund	259.98	534.16	0.973416
Bahn Ines	1967	ASK Vorwärts Potsdam	260	561.93	0.925382
Gärtner Christiane	1964	SC Einheit Dresden	260.14	570.35	0.912212
Vetter, Heidrun	1961	LG Karlsruhe	260.29	567.2	0.917807
Wrede Linda	1993	LT DSHS Köln	260.31	570.69	0.912264
Suffa Laura Franziska	1978	LG Nord Berlin	260.41	559.68	0.930567
Pohl Veronica	1985	LG ASV/DSHS Köln	260.48	564.06	0.92359
Kemper Vera	1953	TuS 1889 Neuenkamp	260.7	552.13	0.944343
Gehring Anna	1996	ASV Köln	260.76	571.21	0.913009
Breit Elisabeth	1964	DSC Oldenburg	260.78	558.45	0.933942
Rosenplänter, Katja	1981	LC Rothaus Breisgau	260.96	577.09	0.9044
Theophil, Nicole	1968	LG Wedel/Pinneberg	260.96	585.92	0.89077
Heldt Ursula	1956	TSV Salzgitter	261	568	0.919014
Coqui Eva-Christina	1968	LG Anger/Piding	261.04	572.97	0.911182
Soeder Christiane	1975	LG Remscheid	261.05	559.59	0.933005
Micus Anja	1963	LC Paderborn	261.08	572.2	0.912548
Bartels, Astrid	1963	LG Wedel/Pinneberg	261.1	576.9	0.905183
Hartthaler Kerstin	1953	SC Turbine Erfurt	261.2	566.6	0.921991
Jooß Jutta	1960	VfL Sindelfingen	261.2	563.22	0.927524
Brömmel Rahel	2002	LG Olympia Dortmund	261.44	566.44	0.923099
Kallabis, Jolanda	2005	FT 1844 Freiburg	261.44	582.58	0.897525
Kramer Nina	1990	LG Hilden	261.51	572.67	0.913301
Dziuk Christina	1965	SC Dynamo Berlin	261.55	567.71	0.921421
Klaus, Jutta	1953	LC/USC Freiburg	261.8	593.2	0.88267
Ressing, Mareike	1970	LG Wedel/Pinneberg	262.16	550.32	0.952755
Karstens, Verena	1975	Wellingdorfer TV	262.22	577.7	0.907807
Gehring, Anna	1996	SC Itzehoe	262.28	571.21	0.918331
Lenz, Claudia	1966	TV Konstanz	263.5	563.65	0.934977
Chrzanowski, Elvira	1951	StTV Singen	263.7	582.6	0.905252
Gutwein, Beate	1960	MTG Laesomed Mannheim	264.22	590.5	0.894903
Merkel, Lisa	2003	LG Region Karlsruhe	264.49	560	0.944607
Raupp, Simone	1976	LG Karlsruhe	264.49	585.28	0.903807
Bor, Viola	1979	LG USC Heidelberg	264.91	565.97	0.936127
Kieninger, Renate	1954	LG Offenburg	265.4	562.8	0.943141
Seith, Bettina	1964	LG Karlsruhe	265.53	567.05	0.936531
Hilschenz, Marina	1981	LG Wedel/Pinneberg	266.6	559.13	0.953624
Fischer, Tanja	1966	TV Staufen	268.37	583.7	0.919548
Svensson, Amelie	1996	LG Region Karlsruhe	268.67	585.57	0.917636
Häring, Sibylle	2000	LG Region Karlsruhe	268.72	575.24	0.934288
Lang, Carolin	1986	LC Rothaus Breisgau	268.82	576.72	0.932237
Tiedemann, Anke	1975	SG TSV Kronshagen/Kieler TB	268.95	572.73	0.939186
Amrhein, Fabienne	1992	MTG Mannheim	269.04	571.95	0.940782
Moh, Susanne	1959	USC Heidelberg	269.1	611.6	0.879987
Jamrozy, Ute	1964	Polizei-SV Eutin	269.2	552.12	0.97515
Hettich, Sarah	1991	LG Region Karlsruhe	269.37	594.2	0.906664
Abel, Svenja	1983	TV Lahr	269.48	567.91	0.949024
Hegmann, Carmen	1970	SC Freudenberg	270.01	568.09	0.950589
Gruben, Lara	1990	MTG Mannheim	270.04	595.23	0.907347
Byrd, Andreina	1978	MTG Mannheim	270.26	583.67	0.926071
Budde, Adia	2005	TSV Altenholz	270.63	573.28	0.944146
von dem Berge, Claudia	1962	LG Wedel/Pinneberg	271.12	593.32	0.913908
Breyer, Marie-Fee	1997	TV Munzingen	271.54	611.23	0.888504
Westphal, Nina	1972	LBV Phönix Lübeck	272.55	591.32	0.921836
Tremmel, Tina	1981	MTG Mannheim	272.81	593.07	0.919993
Mannsdörfer, Katrin	1986	LC 80 Pforzheim	273.11	607.64	0.89892
Wolfsperger, Christine	1967	TV Lahr	273.11	582.34	0.937974
Knörr, Laura	1992	TV Konstanz	273.14	600.32	0.909981
Hoss, Hanna	1994	LC Rothaus Breisgau	273.39	596.48	0.916678
Walter, Ingrid	1949	WG Schönau-Todtnau	273.6	612.4	0.893534
Burmester-Schöler, Beate	1962	LBV Phönix Lübeck	274.2	584.2	0.93872
Kayßer, Paulina	2000	SC Itzehoe	274.21	584.33	0.938545
Steinmetz, Katja	1966	LG Mannheim-Friedrichsfeld	274.66	572.11	0.960165
Willaredt, Andrea	1964	TV Herbolzheim	274.8	599.75	0.916382
Krog, Gesine	1971	LBV Phönix Lübeck	275.08	617.87	0.890414
Mess, Susanne	1969	Kieler TB	275.1	598.5	0.919298
Mensing, Felicitas	1984	LV Biet	275.12	596.37	0.922649
Stocker, Tamara	1990	TG Stockach	275.24	608.28	0.904978
Edmeier, Andrea	1982	TV Rheinfelden	275.6	592.96	0.929574
Löffler, Sabine	1968	LG Hardt	275.82	596.09	0.925431
Jakobs, Angela	1958	LBV Phönix Lübeck	276.2	584.6	0.94492
Östringer, Maren	1974	TSG Wiesloch	276.34	583.39	0.947359
Tränkle, Melina	1992	LG Region Karlsruhe	276.65	585.18	0.945521
Richter, Christine	1964	Bramstedter TS	276.69	609.4	0.908074
Feuerherdt, Lisa	1990	SG TSV Kronshagen/Kieler TB	277.22	627.95	0.882937
Reiser, Nicole	1970	LBV Phönix Lübeck	277.47	617.3	0.898979
Weber, Melanie	1973	LG Coop Kurpfalz	277.49	603.1	0.920212
Adler, Nicole	1992	SG TSV Kronshagen/Kieler TB	277.49	595.4	0.932113
Koßmann, Alicia	1998	SG Leutershausen	277.75	598.65	0.927921
Rußhardt, Katja	1964	TV Staufen	277.8	591.3	0.939625
Ott, Ulrike	1961	TV Konstanz	277.81	606.69	0.915822
Ulrich, Uta	1966	LBV Phönix Lübeck	278.09	607.81	0.915056
Flacke, Johanna	1998	LG Region Karlsruhe	278.22	590.57	0.942208
Adler, Christin	1992	SG TSV Kronshagen/Kieler TB	278.39	594.6	0.936394
Knirsch, Lena	1996	LG Region Karlsruhe	278.44	606.83	0.917687
Grüner, Olivia	1969	LT Radolfzell	278.8	587.64	0.94888
Wagner, Sabrina	1988	LG Offenburg	279.07	593.21	0.940881
Greinert, Sabine	1973	TSV Böklund	279.11	600.62	0.929406
Weber, Sabine	1956	USC Heidelberg	279.2	594.2	0.939751
Braun, Jutta	1956	TV 1893 Rheinau	279.39	587.8	0.950629
Ziegler, Lisa	1994	TV 1847 Bühl	279.43	611.85	0.913394
Nelle, Margit	1968	LG Wedel/Pinneberg	279.5	607.7	0.919862
Roßkopf, Ute	1961	TV Konstanz	279.75	609.6	0.917815
Hansen, Heidrun	1958	Kieler TB	279.9	627.2	0.892538
Schaubhut, Anja	1980	Freiburger FC	280.67	590.78	0.950168
Eising, Annette	1965	Kaltenkirchener TS	280.8	642.1	0.87463
Dietrichs, Ute	1968	Rendsburger TSV	281.7	632.5	0.890751
Hirsch, Carmen	1956	LAV Husum	282.7	619.2	0.913114
Begau, Cornelia	1964	TSV Neustadt	283	614.8	0.920625
Früchtenicht, Meike	1969	LG Wedel/Pinneberg	283.67	631.8	0.897974
Schöndorf, Tanja	1974	TSB Flensburg	284.6	616.2	0.923726
Schmitt, Sabine	1957	LG Wedel/Pinneberg	285	629.4	0.905624
Sietz, Karin	1966	LG Wedel/Pinneberg	285.27	580.92	0.982132
Stadel, Inge	1966	LAV Husum	285.4	614.12	0.92946
Richter, Rhea	1986	LG MTV/Gut Heil Itzehoe	286.54	600.54	0.954274
Strothmann, Kristin	1964	LG Elmshorn	286.8	603.2	0.950928
Petersen, Anja	1971	TSV Drelsdorf	286.88	631.98	0.907877
Brocks, Heinke	1967	SV Friedrichsgabe	287.2	639.2	0.898623
Riedemann, Julia-Marie	1991	LBV Phönix Lübeck	287.28	606.59	0.947197
Thiesen, Andrea	1966	LAV Husum	287.3	644.2	0.891959
Rübhausen, Claudia	1966	SV Rugenbergen	287.5	612.67	0.938515
Willenborg, Nadja	1992	SC Rönnau 74	287.9	613.8	0.938091
Albrecht, Philine	1992	SC Rönnau 74	288.01	638.37	0.902329
Knudsen, Dagmar	1956	LAV Husum	288.2	596.4	0.966465
Ehlers, Maria	1951	TSV Ratekau	288.4	609.1	0.946971
Liebler, Nina	1976	LG Wedel/Pinneberg	288.5	659.17	0.875343
Beck, Corinna	1994	SG TSV Kronshagen/Kieler TB	288.74	654.32	0.882565
Martens, Daniela	1977	LG MTV/Gut Heil Itzehoe	288.78	628.04	0.919623
Müller, Urte	1967	LAV Husum	288.79	627.1	0.921033
Metz, Svenja	1983	WSV Tangstedt	288.96	643.96	0.897447
Mathias, Diana	1973	LG Wedel/Pinneberg	289.1	636.6	0.908263
Klaus, Kristin	1985	LG Wedel/Pinneberg	289.16	624.6	0.925905
Sievers, Leonie	1999	Ahrensburger TSV	289.29	643.42	0.899226
Braun, Simone	1970	TSV Klausdorf	289.37	654.9	0.883707
Gremmel, Anke	1989	SG TSV Kronshagen/Kieler TB	289.52	627	0.923509
Deschka, Kim	1997	SG TSV Kronshagen/Kieler TB	289.86	654.66	0.885528
von der Fecht, Solveig	1975	Halstenbeker TS	290.01	621.41	0.933393
Gründel, Nina	2000	SC Itzehoe	291.09	647.5	0.89912
Hauptstock, Nannette	1969	LBV Phönix Lübeck	291.2	654.6	0.889704
Andresen, Heike	1962	TSV Medelby	291.5	655.7	0.889126
Freiburg, Nadja	1973	LG Wedel/Pinneberg	293.33	658.54	0.890849
Ballert, Gesa	1964	LAG Gettorf/Rieseby	295.1	637.56	0.925717
von Campenhausen, Ingeborg	1964	LAG Gettorf/Rieseby	295.25	652.7	0.904704
Greve, Sigrid	1947	Büdelsdorfer TSV	295.6	653	0.90536
Wirdemann, Meike	1963	LG Wedel/Pinneberg	295.9	602.89	0.981605
Piel, Katja	1971	TSV Kappeln	296.25	654.23	0.905645
Hoffmann, Bianca	1967	LG TEFT	297.24	633.94	0.937754
Skambath, Isabelle	1997	Möllner SV	297.26	658.57	0.902744
Becker, Frauke	1968	LG TEFT	297.86	645.2	0.923311
Schubert, Ariane	1958	TuS Gaarden	298.4	655.5	0.91045
Schäfer, Marion	1965	TSB Flensburg	298.88	652.5	0.916107
Schlotfeldt, Mareile	1998	TSV Schwarzenbek	298.9	648.85	0.921322
Ahlfeldt, Gaby	1965	LG Tönning/St. Peter	299.1	658.4	0.908566
Karthaus, Jasmin	1996	SG TSV Kronshagen/Kieler TB	299.18	658.5	0.908671
Becker, Inge	1968	LG TEFT	299.35	649.2	0.922212
Simon, Hilke	1967	TSV Quellenhaupt Bornhöved	299.5	641.15	0.934259
Wellbrock, Nele	2000	SG TSV Kronshagen/Kieler TB	299.62	636	0.942201
Kroeseler, Sabine	1958	LBV Phönix Lübeck	299.7	635.97	0.942497

## Sheet: 3000-5000
name, first name	date or year of birth	nation or club	sec 3000m	sec 5000m	KsA
WANG Junxia	1973-01-09	CHNCHN	486.11	891.87	0.90841
HASSAN Sifan	1993-01-01	NEDNED	498.49	853.42	0.973514
NIYONSABA Francine	05 MAY 1993	BDIBDI	499.08	865.34	0.961241
TAYE Ejgayehu	2000-02-10	ETHETH	499.52	852.98	0.976029
KLOSTERHALFEN Konstanze	1997-02-18	GERGER	500.07	866.76	0.96157
GIDEY Letesenbet	20 MAR 1998	ETHETH	500.27	846.62	0.984838
OBIRI Hellen	13 DEC 1989	KENKEN	500.68	858.37	0.972153
CHERONO Mercy	07 MAY 1991	KENKEN	501.14	873.95	0.955699
DIBABA Genzebe	1991-02-08	ETHETH	501.29	855.41	0.976705
SZABO Gabriela	1975-11-14	ROUROU	501.42	871.48	0.958943
KIPKEMBOI Margaret Chelimo	1993-02-09	KENKEN	501.53	863.67	0.967827
O'SULLIVAN Sonia	1969-11-28	IRLIRL	501.64	881.02	0.948976
RADCLIFFE Paula	17 DEC 1973	GBRGBR	502.2	869.11	0.963054
AYANA Almaz	1991-11-21	ETHETH	502.22	852.59	0.981754
KAZANKINA Tatyana	17 DEC 1951	URSURS	502.62	923.12	0.907466
CHEPKOECH Beatrice	1991-07-06	KENKEN	502.92	879.33	0.953226
TIROP Agnes Jebet	23 OCT 1995	KENKEN	502.92	860.68	0.973881
MASAI Edith	1967-04-04	KENKEN	503.23	873.84	0.959806
YEGOROVA Olga	28 MAR 1972	RUSRUS	503.26	869.32	0.964854
KIPYEGON Faith	1994-01-10	KENKEN	503.55	845.2	0.99296
KIBIWOT Viola Jelagat	22 DEC 1983	KENKEN	504.41	869.5	0.966858
DEFAR Meseret	1983-11-19	ETHETH	504.51	852.88	0.985895
CHEBET Beatrice	05 MAR 2000	KENKEN	505.01	852.92	0.986826
TSEGAY Gudaf	1997-06-23	ETHETH	505.23	852.29	0.987985
ZADOROZHNAYA Yelena	03 DEC 1977	RUSRUS	505.4	880.47	0.956686
TOMASHOVA Tatyana	1975-07-01	RUSRUS	505.56	879.22	0.958349
ADERE Berhane	1973-11-23	ETHETH	505.62	869.32	0.969378
RENGERUK Lilian Kasait	03 MAY 1997	KENKEN	505.9	863.05	0.976962
BURKA Gelete	1986-01-23	ETHETH	505.92	871.2	0.96786
WEIGHTMAN Laura	1991-07-01	GBRGBR	506.07	875.44	0.963458
OUAZIZ Zahra	20 DEC 1969	MARMAR	506.48	872.08	0.967954
HAILU Freweyni	2001-02-12	ETHETH	506.61	863.45	0.977879
ULMASOVA Svetlana	1953-02-04	URSURS	506.78	905.5	0.932781
MONSON Alicia	13 MAY 1998	USAUSA	506.81	859.45	0.982818
WAMI Gete	11 DEC 1974	ETHETH	507.62	870.88	0.971469
PUICĂ Maricica	1950-07-29	ROUROU	507.83	906.04	0.934157
KISA Janet	05 DEC 1992	KENKEN	508.33	878.7	0.964171
EJIGU Sentayehu	1985-06-28	ETHETH	508.41	868.39	0.975771
JELAGAT Irene	10 DEC 1988	KENKEN	508.51	895.49	0.946428
CHERUIYOT Vivian Jepkemoi	1983-09-11	KENKEN	508.66	860.87	0.984779
DOMÍNGUEZ Marta	1975-11-03	ESPESP	508.8	888.33	0.9546
BUDD Zola	26 MAY 1966	GBRGBR	508.83	888.07	0.954936
JAMAL Maryam Yusuf	1984-09-16	BRNBRN	508.87	891.68	0.951145
MURRAY Yvonne	04 OCT 1964	GBRGBR	509.02	896.94	0.945846
KIPKIRUI Caroline Chepkoech	26 MAY 1994	KENKEN	509.05	867.55	0.977946
CHERONO Priscah Jepleting	1980-06-27	KENKEN	509.06	875.3	0.969306
CHEROMEI Lydia	11 MAY 1977	KENKEN	509.14	886.72	0.956973
GUSKOVA Svetlana	1957-08-19	URSURS	509.36	902.12	0.941043
HAILU Lemlem	25 MAY 2001	ETHETH	509.43	874.53	0.970864
GATERI Teresiah Muthoni	2002-01-05	KENKEN	509.48	884.89	0.959592
ALAOUI SELSOULI Mariem	1984-04-08	MARMAR	509.52	876.52	0.968831
DIBABA Tirunesh	01 OCT 1985	ETHETH	509.55	851.15	0.997768
SIMPSON Jenny	1986-08-23	USAUSA	509.58	896.26	0.947604
KITE Gloria	1998-01-10	KENKEN	509.91	889.22	0.955725
ROWBURY Shannon	1984-09-19	USAUSA	509.93	878.92	0.966963
CRANNY Elise	09 MAY 1996	USAUSA	509.95	888.02	0.957092
BELETE Mimi	1988-06-09	BRNBRN	510	894.71	0.950029
MIKITENKO Irina	1972-08-23	GERGER	510.39	882.03	0.964423
ROMANOVA Yelena	20 MAR 1963	URSURS	510.45	899.7	0.945593
MUIR Laura	09 MAY 1993	GBRGBR	510.53	888.14	0.958051
YORDANOVA Daniela	08 MAR 1976	BULBUL	510.59	896.95	0.948752
RIBEIRO Fernanda	1969-06-23	PORPOR	510.66	876.45	0.971077
WORKU Fantu	29 MAR 1999	ETHETH	510.76	866.8	0.98208
AYALEW Wude	1987-07-04	ETHETH	510.93	878.44	0.969389
LOROUPE Tegla	09 MAY 1973	KENKEN	510.95	885.95	0.961209
MCCOLGAN Eilish	1990-11-25	GBRGBR	511	868.55	0.980561
PAVEY Joanne	1973-09-20	GBRGBR	511.27	879.96	0.968358
OCHICHI Isabella	28 OCT 1979	KENKEN	511.32	878.21	0.970383
AKIDOR Margaret	2002-06-26	KENKEN	511.45	884.83	0.963368
ARTYOMOVA Natalya	1963-01-05	URSURS	511.67	894.08	0.953811
CHOJECKA Lidia	1977-01-25	POLPOL	511.69	904.88	0.942464
WAITZ Grete	01 OCT 1953	NORNOR	511.75	908.8	0.938509
HULL Jessica	22 OCT 1996	AUSAUS	511.81	883.8	0.965169
ABEYLEGESSE Elvan	1982-09-11	TURTUR	511.94	864.68	0.986762
MEYER Elana	10 OCT 1966	RSARSA	512	884.05	0.965255
POZDNYAKOVA Tetyana	04 MAR 1956	URSURS	512	916.37	0.93121
TEFERI Senbere	03 MAY 1995	ETHETH	512.49	855.24	0.998726
KELATI FREZGHI Weini	01 DEC 1996	USAUSA	512.5	893.41	0.956075
CHELANGAT Sarah	2001-06-05	UGAUGA	512.53	880.88	0.969731
NGETICH Agnes Jebet	2001-01-23	KENKEN	512.62	876.7	0.974526
SZENTGYÖRGYI Katalin	1979-01-01	HUNHUN	512.7	902	0.947339
WORKU Ayelech	1979-06-12	ETHETH	512.8	881.23	0.969857
TURAVA Alesia	06 DEC 1979	BLRBLR	512.89	923.84	0.925286
DONG Yanmei	1977-02-16	CHNCHN	513.07	869.82	0.983096
CAN Yasemin	11 DEC 1996	TURTUR	513.29	876.82	0.975666
GEMECHU Tsehay	12 DEC 1998	ETHETH	513.42	869.6	0.984016
GRØVDAL Karoline Bjerkeli	1990-06-14	NORNOR	513.47	871.07	0.982451
SIPATOVA Yelena	1955-06-07	URSURS	513.53	924.6	0.92568
JERUTO Norah	02 OCT 1995	KENKEN	513.61	891.73	0.959951
MAMO Meskerem	1999-04-13	ETHETH	513.63	876.89	0.976234
LEGHZAOUI Asmae	1976-08-30	MARMAR	513.85	888.31	0.964097
VAN HULST Elly	1959-06-09	NEDNED	513.97	917.08	0.93407
BONDARENKO Olga	1960-06-02	URSURS	513.99	895.76	0.956339
CHERONO Gladys	12 MAY 1983	KENKEN	514.05	887.12	0.965766
KRISTIANSEN Ingrid	21 MAR 1956	NORNOR	514.1	877.33	0.976637
KIPYEGO Sally	19 DEC 1985	KENKEN	514.18	870.42	0.984544
KRUMINS Susan	1986-07-08	NEDNED	514.41	891.25	0.961964
GEZAHEGNE Kalkidan	08 MAY 1991	BRNBRN	514.65	892.92	0.960612
MELKAMU Meselech	1985-04-19	ETHETH	514.73	871.91	0.983913
SHOBUKHOVA Liliya	1977-11-13	RUSRUS	514.85	863.75	0.993439
EL KAMCH Zhor	15 MAR 1973	MARMAR	514.85	882.53	0.972299
GOUCHER Kara	1978-07-09	USAUSA	514.99	895.02	0.958992
RHINES Jennifer	1974-07-01	USAUSA	515.03	894.29	0.959849
SMITH Kimberley	1981-11-19	NZLNZL	515.31	885.93	0.969433
FLANAGAN Shalane	1981-07-08	USAUSA	515.34	884.8	0.970728
BENTHAMI-GHEZIELLE Bouchra	19 MAY 1979	FRAFRA	515.41	912.17	0.941729
BRUNET Roberta	20 MAY 1965	ITAITA	515.65	884.5	0.971641
MALOT Leah	1972-06-07	KENKEN	515.74	879.83	0.976969
WEYERMANN Anita	08 DEC 1977	SUISUI	515.83	899.28	0.956006
BARSOSIO Sally	21 MAR 1978	KENKEN	515.89	886.71	0.969671
KOSTER Maureen	1992-07-03	NEDNED	515.93	887.52	0.968861
DIBABA Ejegayehu	21 MAR 1982	ETHETH	515.94	872.74	0.985288
CHELANGAT Sheila	1998-04-11	KENKEN	516.2	880.51	0.977085
Bruns Ulrike	1953	ASK Vorwärts Potsdam	516.38	941.46	0.914148
KIDANE Werknesh	1981-01-07	ETHETH	516.39	873.04	0.985808
HENES Elly	13 OCT 1998	USAUSA	516.86	887.15	0.971012
HAROYE Alemitu	09 MAY 1995	ETHETH	516.87	883.28	0.975285
SLY Wendy	1959-11-05	GBRGBR	517.06	921.45	0.935229
CHENONGE Ines	1982-02-01	KENKEN	517.17	879.19	0.980391
MUTUKU Agnes Mwikali	15 DEC 2002	KENKEN	517.17	891.35	0.967016
DA FONSECA-WOLLHEIM Kristina	1972-02-10	GERGER	517.3	898.43	0.959637
WILLIAMS Lynn	1960-07-11	CANCAN	517.3	901.3	0.956581
da Fonseca- Wollheim Kristina	1972	SV Halle	517.3	898.43	0.959637
HOULIHAN Shelby	1993-02-08	USAUSA	517.4	863.92	0.998163
KIBET Sylvia Jebiwot	28 MAR 1984	KENKEN	517.47	871.91	0.98915
BAHTA Meraf	1989-06-24	SWESWE	517.5	889.95	0.969156
KONGA Pauline	1970-04-10	KENKEN	517.76	887.51	0.972308
CHECA Dolores	27 DEC 1982	ESPESP	517.78	886.3	0.973673
MURIUKI Margaret Wangari	21 MAR 1986	KENKEN	517.97	880.48	0.980469
SAINA Betsy	1988-06-30	KENKEN	518.01	879.49	0.981648
FERNÁNDEZ Nuria	1976-08-16	ESPESP	518.05	924.17	0.934262
WILLIS-JOHNSON Benita	06 MAY 1979	AUSAUS	518.06	887.6	0.972773
VYAZOVA Yelena	1960-04-18	URSURS	518.1	923.25	0.935283
BELKACEM Yamna	1974-02-20	FRAFRA	518.13	887.79	0.972696
BASTOS Marina	1971-07-07	PORPOR	518.13	907.29	0.95179
MCCOLGAN Liz	24 MAY 1964	GBRGBR	518.23	899.56	0.960155
DIRO Etenesh	10 MAY 1991	ETHETH	518.32	873.3	0.989198
WYETH Alison	26 MAY 1964	GBRGBR	518.42	900.37	0.959643
FEYSA Hawi	1999-02-01	ETHETH	518.48	873.66	0.989096
DEBUES-STAFFORD Gabriela	1995-09-13	CANCAN	518.51	884.12	0.97745
OLJIRA Belaynesh	1990-06-26	ETHETH	518.55	882.57	0.979242
MASAI Linet Chepkwemoi	05 DEC 1989	KENKEN	518.97	871.14	0.992894
PLIŚ Renata	1985-02-05	POLPOL	519.18	918.75	0.941823
COURTNEY-BRYANT Melissa	1993-08-30	GBRGBR	519.2	893.82	0.968129
CHERUIYOT Rose	1976-07-21	KENKEN	519.34	886.41	0.976486
RUNYAN Marla	1969-01-04	USAUSA	519.36	899.2	0.962633
JACOBS Regina	1963-08-28	USAUSA	519.56	885.35	0.978069
DIRIBA Buze	1994-02-09	ETHETH	519.65	890.02	0.973105
LAN Lixin	1979-02-14	CHNCHN	519.67	885.33	0.978298
CAUNE Agate	2004-08-07	LATLAT	519.78	912.94	0.948912
RUDOLPH Amy	1973-09-18	USAUSA	519.86	896.04	0.966958
MOHAMED Zakia Mrisho	1984-02-19	TANTAN	519.91	883.87	0.980367
APLACHKINA Svetlana	1992-11-28	ANAANA	519.95	922.14	0.939752
GEBRU Azmera	31 OCT 1995	ETHETH	520.01	897.38	0.965793
CHEMNUNG Loice	1997-02-22	KENKEN	520.08	883.65	0.980931
CHEPCHUMBA Peninah	1985-01-14	KENKEN	520.12	900.26	0.962907
WIGENE Susanne	1978-02-12	NORNOR	520.23	888.53	0.975825
SCHWEIZER Karissa	04 MAY 1996	USAUSA	520.25	866.34	1.00086
MARKOVC Amy-Eloise	1995-08-05	GBRGBR	520.32	896.6	0.967209
BURKARD Elena	1992-02-10	GERGER	520.46	912.17	0.950956
CHURBANOVA Olga	1965-07-16	RUSRUS	520.48	921.36	0.941507
KIPLAGAT Florence	1987-02-27	KENKEN	520.72	880.14	0.986055
TIMBILILI Alice Jemeli	1983-02-01	KENKEN	520.76	887.06	0.978438
BORISOVA Lyudmila	1966-08-03	RUSRUS	520.78	912.52	0.951175
GALVÁN Laura	05 OCT 1991	MEXMEX	520.81	889.34	0.976023
WANJIRU Veronica	29 OCT 1989	KENKEN	520.81	884.82	0.981009
TANAKA Nozomi	1999-09-04	JPNJPN	520.84	893.6	0.971426
BUTLER Kathy	22 OCT 1973	GBRGBR	520.97	905.51	0.958889
TWELL Stephanie	1989-08-17	GBRGBR	520.98	894.08	0.971166
PLUMER Patti Sue	1962-04-27	USAUSA	520.98	900	0.964778
PIPPIG Uta	1965-09-07	GERGER	520.99	904.87	0.959604
YIN Lili	1979-11-11	CHNCHN	521.05	879.96	0.986882
KORIKWIANG Pauline Chemning	01 MAR 1988	KENKEN	521.11	881.28	0.985517
VAQUERO Julia	1970-09-18	ESPESP	521.23	884.95	0.981656
INFELD Emily	21 MAR 1990	USAUSA	521.29	890.9	0.975212
TIKKANEN Päivi	1960-01-19	FINFIN	521.3	915.76	0.948757
SCOTT Dominique	1992-06-24	RSARSA	521.33	899.08	0.966414
EISA Medina	2005-01-03	ETHETH	521.42	856.54	1.01459
AUGUSTO Jessica	1981-11-08	PORPOR	521.53	877.07	0.991046
CHERONO Eva	1996-08-15	KENKEN	521.69	870.77	0.998522
WELLINGS Eloise	1982-11-09	AUSAUS	521.78	894.11	0.972625
GEBRZIHAIR Girmawit	2001-11-21	ETHETH	521.88	886.12	0.981583
HAND-PETERS Annette	31 MAY 1965	USAUSA	521.97	896.07	0.97085
FIDATOV Elena	1960-07-24	ROUROU	521.98	912.58	0.953305
BUSIENEI Selah	27 DEC 1991	KENKEN	522.01	888.24	0.979484
BOGOMOLOVA Galina	15 OCT 1977	RUSRUS	522.03	899.72	0.967023
ALEMU Derebe	1983-06-05	ETHETH	522.1	900.56	0.966251
CHEPCHUMBA Pamela	08 MAR 1979	KENKEN	522.24	896.75	0.970616
OLAFSSON Loa	1958-01-29	DENDEN	522.3	908.8	0.957857
GHICAN Viorica	1965-06-09	ROUROU	522.39	909.9	0.956863
KASTOR Deena	1973-02-14	USAUSA	522.59	891.62	0.976855
MOREIRA Sara	17 OCT 1985	PORPOR	522.69	894.71	0.973667
BONDARCHUK Irina	1952-09-17	URSURS	522.84	912.62	0.954833
PROKOPČUKA Jeļena	1976-09-21	LATLAT	522.86	887.71	0.981664
SALPETER Lonah Chemtai	12 DEC 1988	ISRISR	522.88	899.02	0.969352
SAMITOVA-GALKINA Gulnara	1978-07-09	RUSRUS	522.96	873.13	0.998248
HUDDLE Molly	1984-08-31	USAUSA	522.99	882.64	0.987549
DIAS Maria Albertina	1965-04-26	PORPOR	523.08	905.12	0.963187
LOKAR Claudia	1964-02-09	GERGER	523.11	907.62	0.960589
Lokar Claudia Margareta	1964	LG Olympia Dortmund	523.11	907.62	0.960589
BABCOCK Courtney	1972-06-30	CANCAN	523.18	894.98	0.974286
ANTENEH Emebet	1992-01-13	ETHETH	523.2	883.29	0.987218
BREA Joselyn Daniely	1994-08-12	VENVEN	523.26	887.76	0.98236
LOBUN Hellen Ekalale	18 MAR 1999	KENKEN	523.33	901.14	0.967904
MORGAN Whittni	22 OCT 1997	USAUSA	523.39	902.07	0.967017
MAAMA-YVELAIN Fatima	31 DEC 1969	FRAFRA	523.53	898.18	0.971465
Friedmann Birgit	1960	Eintracht Frankfurt	523.65	946.38	0.922198
UTURA Sule	1990-02-08	ETHETH	523.72	884.21	0.987171
BELAYNEH Fantaye	2000-09-15	ETHETH	523.82	884.51	0.987025
FLESHMAN Lauren	1981-09-26	USAUSA	523.92	898.48	0.971864
CHEPKEMEI Susan	1975-06-25	KENKEN	523.95	895.27	0.975404
PRATT Aimee	03 OCT 1997	GBRGBR	524.15	929.54	0.939802
SERGENT-PALLUY Annette	1962-11-17	FRAFRA	524.19	916.44	0.953308
FRANKIEWICZ Wioletta	1977-06-09	POLPOL	524.22	908.38	0.961822
KARLSHØJ Gitte	14 MAY 1959	DENDEN	524.35	922.95	0.946873
DANDOLO Nadia	1962-09-11	ITAITA	524.36	911.64	0.958639
PAPP Krisztina	17 DEC 1982	HUNHUN	524.49	908.65	0.962032
MOCKENHAUPT Sabrina	06 DEC 1980	GERGER	524.65	899.88	0.971704
WESSEL Kathrin	1967-08-14	GDRGDR	524.81	898.71	0.973265
KLEIN Hanna	1993-04-06	GERGER	525	891.71	0.981261
POPKOVA Natalya	1988-09-21	RUSRUS	525.1	905.95	0.966021
RODCHENKOVA Marina	1961-07-30	URSURS	525.69	919.26	0.953104
FURNISS Jane	1960-08-23	GBRGBR	525.69	932.34	0.939732
GRIGORYEVA Lidiya	1974-01-21	RUSRUS	525.73	917.21	0.955306
TOONSTRA Christine	1966-06-22	NEDNED	525.96	907.68	0.965759
NENASHEVA Viktoriya	1970-06-28	RUSRUS	526.02	895.82	0.978656
FATES Farida	1962-02-02	FRAFRA	526.04	916.41	0.956704
GARGANO Margherita	1952-11-18	ITAITA	526.31	920.94	0.952487
CUNHA Aurora	31 MAY 1959	PORPOR	526.37	906.96	0.967279
BLEASDALE Julia	1981-09-09	GBRGBR	526.38	902	0.972616
MIŠMAŠ ZRIMŠEK Maruša	24 OCT 1994	SLOSLO	526.44	908.12	0.966172
GEGA Luiza	1988-11-05	ALBALB	526.61	916.47	0.957678
PUMPER Susanne	1970-09-01	AUTAUT	527.04	910.54	0.964702
LUKAN Klara	2000-09-08	SLOSLO	527.17	901.37	0.974757
BOLTZ Jill	14 OCT 1966	GBRGBR	527.36	909.98	0.965882
RUTTO Stella	12 DEC 1996	ROUROU	527.36	906.93	0.96913
ZHILYAYEVA Alla	1969-02-05	RUSRUS	527.46	899.46	0.977364
STAVIK Hilde	1962-09-06	NORNOR	527.47	922.77	0.952693
TOOBY Angela	24 OCT 1960	GBRGBR	527.59	913.22	0.962875
Michallek Vera	1958	LG Frankfurt	527.62	941.68	0.933827
Sujew Diana	1990	LT Haspa Marath.Hamburg	527.68	1006.43	0.873848
MØLLER Anna Emilie	1997-07-28	DENDEN	527.83	907.7	0.969171
ALEKSANDROVA Galina	15 OCT 1975	RUSRUS	527.9	909.61	0.967264
KOBA Tamara	1957-02-24	URSURS	527.99	920.97	0.955496
Reh Alina	1997	SSV Ulm	528.05	904.1	0.973436
THACKERY Calli	1993-01-09	GBRGBR	528.1	902.55	0.9752
CULLEN Mary Teresa	1982-08-17	IRLIRL	528.17	919.04	0.957829
SOROKOVSKAYA Natalya	1962-07-23	URSURS	528.2	916.83	0.960193
SANDELL Annemari	1977-01-02	FINFIN	528.36	896.22	0.982571
WEISSTEINER Silvia	1979-07-13	ITAITA	528.63	902.65	0.97607
FUDGE Paula	30 MAR 1952	GBRGBR	528.74	914.51	0.963613
REA Elisa	23 MAR 1968	ITAITA	528.76	926.5	0.951178
WAGNER-GYÜRKÉS Viktória	15 OCT 1992	HUNHUN	528.83	914.24	0.964061
WEDLUND Sara	27 DEC 1975	SWESWE	528.87	906.9	0.971937
MACHADO Mariana	2000-11-12	PORPOR	529.09	915.56	0.963145
DEJAEGHERE Veerle	1973-08-01	BELBEL	529.31	919.73	0.959176
VASTENBURG Jip	21 MAR 1994	NEDNED	529.5	915.77	0.96367
VAN ES Diane	22 MAR 1999	NEDNED	529.55	907.52	0.972522
WALKER Eloise	27 MAY 2001	GBRGBR	529.56	925.21	0.953946
Bibernell Ines	1965	SC Chemie Halle	529.8	927.05	0.952484
LLADO Josianne	1974-11-27	FRAFRA	529.98	911.26	0.969317
Kock Maren	1990	LG TF Regensburg	530.12	922.75	0.9575
SOMMAGGIO Silvia	1969-11-20	ITAITA	530.3	920.89	0.95976
DUBROVA Marina	09 DEC 1978	UKRUKR	530.34	902.73	0.979141
WHITTLE Laura	1985-06-27	GBRGBR	530.37	908.58	0.972892
MCCAMBRIDGE Maria	1975-07-10	IRLIRL	530.4	905.86	0.975868
BATTOCLETTI Nadia	2000-04-12	ITAITA	530.66	881.3	1.00356
DOMORADSKAYA Anna	1953-11-17	URSURS	530.66	919	0.962387
Veith Gabriele	1956	SC Cottbus	530.68	921.9	0.959395
POLUŠKINA Inna	1984-07-07	LATLAT	530.69	922.43	0.958862
JAVORNIK Helena	26 MAR 1966	SLOSLO	530.71	915.4	0.966262
LAHTI Sarah	1995-02-18	SWESWE	530.97	904.87	0.977986
KOROBKINA Yelena	1990-11-25	RUSRUS	531	914.67	0.967562
CLARKE Rosie	1991-11-17	GBRGBR	531.02	919.75	0.962254
GARCÍA Marta	1998-01-01	ESPESP	531.04	917.1	0.965071
MCKIERNAN Catherina	1969-11-30	IRLIRL	531.33	889.4	0.995671
MCGEORGE Sonia	1964-11-02	GBRGBR	531.33	929.04	0.953188
VASILYEVA Yuliya	23 MAR 1987	RUSRUS	531.62	920.41	0.962651
BELETE Almenesh	1989-07-26	BELBEL	531.7	910.24	0.973553
CLITHEROE Helen	1974-01-02	GBRGBR	531.82	906.75	0.97752
MAGNANI Margherita	1987-02-26	ITAITA	531.82	925.44	0.957779
DUQUENOY Laurence	1969-09-29	FRAFRA	531.97	924.03	0.959511
MURCIA Rosario	1964-09-23	FRAFRA	532.2	925.33	0.958577
GALYAMOVA Nadezhda	1959-07-22	URSURS	532.39	924.65	0.959624
MONTEIRO Inês	18 MAY 1980	PORPOR	532.47	901.06	0.984896
MATVEYEVA Lyudmila	1957-02-01	URSURS	532.49	916.27	0.968583
KEITH Megan	2002-04-23	GBRGBR	532.51	896.98	0.98945
LEHMANN-VEITH Gabriele	24 OCT 1956	GDRGDR	532.6	921.9	0.962867
JUDD Jess	1995-01-07	GBRGBR	532.73	897.19	0.989627
KOENS Grete	26 MAY 1967	NEDNED	533.01	920.91	0.964644
MOROIANU Rodica Daniela	1970-11-18	FRAFRA	533.16	917.31	0.968702
CALVIN Clémence	17 MAY 1990	FRAFRA	533.2	907.58	0.979161
AGAFONOVA Kseniya	04 MAR 1983	RUSRUS	533.3	906.98	0.979992
IVANOVA Marina	1983-06-30	RUSRUS	533.56	914.57	0.972333
HARVEY Natalie Anne	1975-01-19	GBRGBR	533.63	914.08	0.972982
Zaituc Luminita	1968	LG Braunschweig	533.72	933.58	0.95282
BITZNER-DUCRET Blandine	01 DEC 1965	FRAFRA	533.99	913.96	0.973766
NAUER Daria	21 MAY 1966	SUISUI	534.53	913.93	0.974783
GUIDA Maria	1966-01-23	ITAITA	534.59	898.84	0.991259
SULTANOVA-ZHDANOVA Firaya	1961-04-29	URSURS	534.62	913.46	0.975449
ROOMS Lisa	1996-06-17	BELBEL	534.64	926.27	0.961995
VOLKOVA Yekaterina	1978-02-16	RUSRUS	534.64	900.02	0.990052
ENGLISH Una	1970-08-14	IRLIRL	534.73	919.12	0.969641
LOZANO Ana	1991-02-22	ESPESP	534.95	914.23	0.975229
Biba Iris Gerda	1964	DJK Freigericht	534.99	926.24	0.962655
BALSAMO Agata	1970-11-11	ITAITA	535.03	914.7	0.974873
GORECKA Emelia	1994-01-29	GBRGBR	535.11	907.45	0.982809
Harrer Corinna	1991	LT TF Regensburg	535.47	941.73	0.947671
AVERY Kate	10 OCT 1991	GBRGBR	536.24	925.63	0.965541
Benfares Sara	2001	LC Rehlingen	536.36	920.94	0.970675
BERRY Catherine	08 OCT 1975	GBRGBR	536.44	919.78	0.972044
Schulz Melanie	1979	SV Creaton Großengottern	536.46	931.67	0.959675
ASTIN Sarah	22 OCT 1993	GBRGBR	536.59	936.43	0.955028
Hoffmann Katje	1971	SCC Berlin	536.73	963.96	0.927995
Wessinghage Ellen	1948	TuS Rot-Weiß Koblenz	536.77	934.76	0.957055
Karhoff Andrea	1974	ASV Köln	536.79	930.23	0.961751
FRY Izzy	04 MAY 2000	GBRGBR	536.93	921.32	0.971306
Preßler Kerstin M.- L.	1962	LAC Halensee Berlin	537	937.47	0.954697
TOOBY Susan	24 OCT 1960	GBRGBR	537.17	935.4	0.957113
Beck Ulrike	1961	TV Konstanz	537.95	957.52	0.93636
Beck, Ulrike	1961	TV Konstanz	537.95	957.52	0.93636
Teske Charlotte	1949	ASC Darmstadt	538.05	919.54	0.975216
ARTER Charlotte	1991-06-18	GBRGBR	538.48	930.35	0.964655
Kunkel Sabine	1964	VfL Wolfsburg	538.54	972.7	0.922758
DONNELLY Abbie	1996-09-02	GBRGBR	538.59	942.65	0.952262
PARKER Barbara	1982-11-08	GBRGBR	538.62	912.81	0.983447
Dattke Miriam	1998	LG Telis Finanz Regensburg	539.24	928.37	0.968077
Wassiluk Petra	1969	ASC Darmstadt	539.56	915.17	0.982623
NESBITT Jennifer	1995-01-24	GBRGBR	539.86	917.39	0.98079
Winkelmann Antje Petra	1965	LG Göttingen	540.03	940.14	0.957357
STOCKTON Stevie	1989-08-23	GBRGBR	540.67	941.11	0.957504
Möldner Antje	1984	SC Potsdam	540.74	965.82	0.933128
REED Kate	1982-09-28	GBRGBR	541.17	929.1	0.970778
Krause Gesa Felicitas	1992	LG Eintracht Frankfurt	542.04	924.53	0.977145
Meyer Lea	1997	VfL Löningen	542.25	931.32	0.970397
HOLLAND Julie	1966-01-20	GBRGBR	542.25	931.78	0.969918
MILLARD Alexandra	31 DEC 2001	GBRGBR	542.8	943.41	0.958933
Metzner Claudia	1966	BV Teutonia Lanstrop	543.41	950.29	0.95306
WOOTTON Katrina	1985-09-02	GBRGBR	543.87	930.82	0.973819
YOUNG-WILKINSON Sarah	1970-01-02	GBRGBR	544.27	940.85	0.964146
Köster Dörte	1973	SC Empor Rostock	544.68	916.32	0.990702
HOLT Kate	1992-09-07	GBRGBR	544.82	948.45	0.957387
Jerschabek Birgit	1969	Schweriner SC	545.04	953.06	0.95314
Neuhaus Beatrix	1963	LAV Menden	545.49	965.21	0.941919
Hain Jeanette	1966	SC Dynamo Berlin	545.55	982.3	0.925634
Franzis Elisabeth	1962	SV Sonsbeck 1919	545.7	992.28	0.916576
Restle Simret	1984	LG Eintracht Frankfurt	545.99	945.55	0.962385
AXFORD Kate		GBRGBR	546.02	949.79	0.958142
Kukel Monika	1966	ASK Vorwärts Potsdam	546.27	983.1	0.926101
KIDGER Beth	16 MAR 1994	GBRGBR	546.29	937.47	0.971213
Sussmann Jana	1990	LT Haspa Marath.Hamburg	546.35	954.92	0.95357
OCKENDEN Verity	1991-08-31	GBRGBR	546.54	903.51	1.00818
Dreher Claudia	1971	LG Olympia Dortmund	546.83	933.83	0.975963
PIDGEON Emily	1989-06-01	GBRGBR	546.87	932.27	0.977667
TANK Poppy	05 DEC 1997	GBRGBR	547.16	945.07	0.964937
PALLANT Emma	1989-06-04	GBRGBR	547.28	935.27	0.975262
Hofmann Elvira	1961	TV Bad Mergentheim	547.4	972.2	0.938421
WALLACE Andrea	1966-11-22	GBRGBR	547.49	928.63	0.982612
FULLERTON Faye	31 MAY 1984	GBRGBR	547.52	953.69	0.956845
HESLOP Justina	03 MAR 1979	GBRGBR	547.62	949.74	0.961
Mann Sabine	1965	ASV Köln	547.85	981.44	0.930351
Nußbeck Sylvia	1977	TSV Bayer 04 Leverkusen	548.04	949.99	0.961484
NEWPORT DAVIES Angela	21 OCT 1970	GBRGBR	548.12	943.99	0.967736
Lichtenfeld Yvonne	1969	SC Chemie Halle	548.47	1001	0.913203
Fleischer Andrea	1963	TuS Jena	548.49	946.6	0.965719
Coutellier Vera	1995	ASV Köln	548.5	965.85	0.946489
YELLING Hayley	1974-01-03	GBRGBR	548.64	916.44	0.997774
MURRAY Freya	1983-09-20	GBRGBR	548.97	926.05	0.988014
Kraus Melanie	1974	TSV Bayer 04 Leverkusen	549.22	941.89	0.97184
Kirtzel Carolin	1995	SV Werder Bremen	549.73	961.61	0.952794
Krebs Denise	1987	TSV Bayer o4 Leverkusen	550.08	926.58	0.989445
Finke Christiane	1962	LG Göttingen	550.13	984	0.931792
WILLIAMS Bella	05 OCT 1998	GBRGBR	550.16	943.23	0.972121
HOWARTH Lauren	1990-04-21	GBRGBR	550.32	929.26	0.987022
BAKER Eleanor	11 DEC 1983	GBRGBR	550.34	944.98	0.970638
Vetter Heidrun	1961	TSV Genkingen	550.62	972.65	0.943505
EDWARDS Sian	1988-11-24	GBRGBR	550.67	942.48	0.973796
YELLING Liz	05 DEC 1974	GBRGBR	551.04	938.86	0.978208
Wolf Kathrin	1966	SC Einheit Dresden	551.16	948.84	0.96813
QUIRK Amelia	18 DEC 1999	GBRGBR	551.2	943.35	0.973834
DUCK Claire	1985-08-29	GBRGBR	551.26	939.68	0.977744
COULSON Jessica	1990-04-18	GBRGBR	551.28	929.5	0.988488
Schmidt Astrid	1963	LAV Aschaffenburg-Stadt	551.29	961.87	0.95524
PURDUE Charlotte	1991-06-10	GBRGBR	551.54	923.4	0.995488
Schmidt Friederike	1973	Dresdner SC 1898	551.89	999.6	0.920185
Jamrozy Ute	1964	Polizei SV Eutin	552.12	950.64	0.967979
Jamrozy, Ute	1964	Polizei-SV Eutin	552.12	950.64	0.967979
Kemper Vera	1953	TuS 89 Neuenkamp	552.13	1002.6	0.91783
PALMER Gillian	13 DEC 1980	GBRGBR	552.47	953.96	0.965222
KIRK Elinor	1989-04-26	GBRGBR	552.5	937.65	0.982065
Teegen, Isabell	1993	SC Rönnau 74	552.8	964.45	0.955294
TITTERINGTON Helen	24 OCT 1969	GBRGBR	552.93	940.14	0.980226
Granz Caterina	1994	LG Nord Berlin	553.02	946.64	0.973654
Mayer Domenika	1990	LG Telis Finanz Regensburg	553.03	952.95	0.967225
THOMAS-SAMUELS Sonia	16 MAY 1979	GBRGBR	553.06	944.24	0.9762
Wirdemann Meike	1963	LG Nord-West Hamburg	553.15	988.1	0.93302
BOWDEN Philippa	29 MAR 1995	GBRGBR	553.24	944.54	0.976207
JONES Caryl	1987-04-04	GBRGBR	553.6	937.03	0.984671
Hüls Annette	1966	TV Detmold	553.67	1001.5	0.921401
WHITCOMBE-GREEN Andrea	1971-06-08	GBRGBR	553.81	932.62	0.989703
Hiller Julia	1987	LAC Quelle Fürth/München	553.82	978.97	0.942862
Hahn Susanne	1978	SV Schlau.com Saar 05	553.9	943.41	0.978542
Walter Doreen	1976	LAC Erdgas Chemnitz	553.9	964.6	0.957046
TURTLE Gemma	15 MAY 1986	GBRGBR	554.8	944.09	0.979426
Vahlensieck Christa	1949	Barmer TV 1846	554.9	978.24	0.945405
DEADMAN Lauren	27 MAR 1984	GBRGBR	555.08	945.12	0.978853
FAGAN Collette	1982-06-06	GBRGBR	555.18	949.51	0.974503
HOSKER-THORNHILL Emily	27 OCT 1992	GBRGBR	555.37	946.22	0.978226
Rehberg Maya	1994	SC Rönnau 74	555.39	990.49	0.934537
Rehberg, Maya	1994	SG TSV Kronshagen/Kieler TB	555.39	990.49	0.934537
SMALL Louise	27 MAR 1992	GBRGBR	555.47	941.94	0.982847
Themann Tabea	1992	SV Molbergen	555.61	980.01	0.944905
WHITMORE Hannah	1984-02-24	GBRGBR	555.65	950.48	0.974332
Wennemar Sigrid	1967	LG Gütersloh	555.65	979.5	0.945465
POTTER Elizabeth	27 DEC 1991	GBRGBR	555.76	928.32	0.997788
Heuing Mathilde	1952	Bielefelder TG	555.9	986	0.939655
Bultmann Birte	1974	LG Braunschweig	556.19	964.7	0.960903
Kleinmann Larissa	1978	VfL Waiblingen	556.75	958.12	0.968476
CHAPMAN Sarah	1998-04-21	GBRGBR	557.03	949.69	0.977565
Benfares Selma	1999	LC Rehlingen	557.03	974.29	0.952882
Pulte Johanna	2003	SG Wenden	557.1	989.89	0.937983
Pingpank Svenja	1996	Hannover Athletics	557.26	962.67	0.964782
WALSH Jennifer	1993-02-22	GBRGBR	557.4	954.57	0.973213
Grossert Doris	1961	LG Braunschweig	557.4	984.12	0.943991
Lorch Britta	1968	SC 1880 Frankfurt	557.77	982.47	0.946204
Hutterer Heidi	1959	TG Landshut	557.96	976.8	0.95202
Vortmeier Anneke	2002	ASV Duisburg	558.06	1004.19	0.926219
KNIGHTS Bethan	1995-09-28	GBRGBR	558.25	951.49	0.977852
Papenfuß Josina	2000	TSG Westerstede	558.39	990.59	0.939491
Hahner Lisa	1989	RUN2SKY.com	558.42	949.83	0.97986
Hahner, Lisa	1989	RUN2SKY.com	558.42	949.83	0.97986
Kalinowski Tanja	1968	ASV Köln	558.57	964.4	0.965315
CHATTENTON Dani	1996-07-04	GBRGBR	558.64	953.25	0.976729
Heckel Emma	2002	LG Telis Finanz Regensburg	558.64	952.78	0.977211
Weiss Sabine	1957	LG Bayer Leverkusen	558.85	994.01	0.937029
ELLIOTT Lucy	09 MAR 1966	GBRGBR	559.02	934.4	0.99711
KRZYWICKI Tara	09 MAR 1974	GBRGBR	559.1	948.01	0.982936
Hilschenz Marina	1981	LG Wedel/Pinneberg	559.13	982.5	0.948482
Hilschenz, Marina	1981	LG Wedel/Pinneberg	559.13	990.9	0.940441
Soeder Christiane	1975	ASV Köln	559.59	988.08	0.943901
Böker Stefanie	1957	TG Bielefeld 1848	559.62	992.97	0.939303
Suffa Laura Franziska	1978	LG Nord Berlin	559.68	978.45	0.953345
Drews Cathleen	1979	LSV Pirna	560.02	1006.28	0.927542
Bard Bettina	1972	LG Braunschweig	560.13	994.98	0.93826
TAYLOR Nicole	1995-01-18	GBRGBR	560.3	949.25	0.983759
Heim Thea	1992	LG Telis Finanz Regensburg	560.41	968.34	0.964554
Soethout Jana Janine	1989	LG TF Regensburg	560.48	960.51	0.972539
Koubaa Sanaa	1985	TSV Bayer 04 Leverkusen	560.65	1000.42	0.934024
Maisch Ulrike	1977	1.LAV Rostock	560.79	958.17	0.975453
Pohlmann Antje	1968	LG Olympia Dortmund	561.31	973.98	0.960509
Lehmann Eva- Maria	1958	SCC Berlin	561.48	1003.8	0.932257
Fischer Ingrid	1961	TuS Rot-Weiß Koblenz	561.52	987.79	0.947435
Kümpers Julia	1992	Leichtathletikclub Kronshagen	562.01	981.56	0.95428
Kümpers, Julia	1992	LAC Kronshagen	562.01	981.56	0.95428
Immerz Claudia	1966	VfL Waiblingen	562.09	1004.31	0.932796
Lutz Susanne	1987	LG Telis Finanz Regensburg	562.24	972.84	0.963228
Götte Marion	1960	TV Wattenscheid 01	562.49	994.2	0.942952
Schöneborn Rabea	1994	LG Nord Berlin	562.55	953.88	0.982915
Schnuch Sabine	1962	LAV Bayer Uerdingen/Dorm.	562.66	1006.44	0.931766
Kieninger Renate	1954	LG Offenburg	562.8	979.1	0.958023
Kieninger, Renate	1954	LG Offenburg	562.8	979.1	0.958023
WALKER Hannah	1991-08-09	GBRGBR	562.85	948.69	0.98882
Dreier Verena	1985	LG Sieg	563.18	970.87	0.966796
Müller Isabelle	1971	SV Saar 05 Saarbrücken	563.35	987.93	0.950388
Riemann Sandra	1973	ESC Erfurt	563.41	982.34	0.955898
Maak Petra	1964	LAV Bayer Uerdingen/Dorm.	563.76	974.54	0.964147
Pohl Veronica	1985	LG ASV/DSHS Köln	564.06	963.99	0.975218
Schwennen Cornelia	1987	SC Concordia Emsbüren	564.29	973.16	0.966422
Leukel Christiane	1968	LG Andernach/Neuwied	564.63	993.3	0.947398
Schrulle Mareike	1989	LG ASV/DSHS Köln	565.62	972.66	0.969198
Bockel Karen	1975	VfL Waiblingen	565.63	980.98	0.960995
Herzberg Kerstin	1966	SC Motor Jena	565.8	959	0.983316
Bor, Viola	1970	LG USC Heidelberg	565.97	1009.2	0.934684
INGLIS Sarah	1991-08-28	GBRGBR	566.02	905.51	1.04181
Staab Klothilde	1961	LAC Quelle Fürth	566.1	982.71	0.9601
Schnabel Anja	1985	LAZ Salamander	566.44	978.18	0.965126
DAMEN Louise	12 OCT 1982	GBRGBR	566.62	953.11	0.990827
Kröckert Christina	1989	TSV Bayer 04 Leverkusen	566.68	965.96	0.977749
GILL Vicky	1980-08-21	GBRGBR	566.87	942.4	1.00253
Gerdes Christina	1995	BV Garrel	567.04	979.85	0.964501
Seith, Bettina	1964	LG Karlsruhe	567.05	1027.51	0.91978
Geukes Nicole	1969	DJK Lowick	567.41	987.49	0.957664
Waeber Beate	1967	SWC 46 Regensburg	567.56	997.43	0.948371
PARKINSON Amanda	1971-07-21	GBRGBR	567.59	954.09	0.991503
Hottenrott Laura	1992	GSV Eintracht Baunatal	567.7	955.87	0.989849
Abel Svenja	1983	TV Lahr	567.91	986.2	0.959761
Abel, Svenja	1983	TV Lahr	567.91	986.2	0.959761
Hegmann Carmen	1970	SC Freudenberg	568.09	1007.45	0.939815
Hegmann, Carmen	1970	SC Freudenberg	568.09	1007.45	0.939815
Petersen Birgit	1962	ASV Köln	568.17	993.1	0.953529
Herzberg, Kerstin	1966	LBV Phönix Lübeck	568.2	959	0.987487
CLAYTON Emma	1988-07-16	GBRGBR	568.23	944.38	1.00283
Allmannstötter Gabriele	1960	VfL Waldkraiburg	568.79	987.81	0.959682
Weis Kira	2004	KSG Gerlingen	569.26	980.21	0.967922
AUCKLAND Rhona	11 MAY 1993	GBRGBR	569.28	927.6	1.02285
STEEL Gemma	1985-11-12	GBRGBR	569.28	947.21	1.00168
Stahl Jasmina	2002	Hannover 96	569.39	980.13	0.968222
WALDRON Sarah	1988-02-11	GBRGBR	569.55	937.49	1.01254
Michel Sylvia	1967	SC Turbine Erfurt	569.58	1003.2	0.946272
Bermes Chiara	1993	Lauftreff Schweich	569.67	983.85	0.965035
Pirang Irene	1952	LG Bonn/Troisdorf	570.4	1005	0.945937
Viellehner Julia	1985	LG Passau	570.49	985.98	0.964337
Kistner Sarah	1997	MTV Kronberg	570.68	986.17	0.964472
Wrede Linda	1993	LT DSHS Köln	570.69	987.13	0.963551
Hanner Elisabeth	1966	Moerser TV 1850	570.76	978.98	0.971692
Stephan Angelika	1952	LAC Quelle Fürth	570.9	1008.7	0.943293
Reng Franziska	1996	LG Telis Finanz Regensburg	570.92	997.75	0.953679
Gehring Anna	1996	SC Itzehoe	571.21	948.02	1.00422
Gehring, Anna	1996	SC Itzehoe	571.21	952.88	0.999094
Oed Lisa	1999	SSC Hanau-Rodenbach	571.46	969.34	0.982559
Frank Annika	1992	LAV Stadtwerke Tübingen	571.54	1001.79	0.950865
Pautmeier Maria	1967	TuS Solbad Ravensberg	571.59	987.4	0.964807
Effler Constanze	1975	SCC Berlin	571.6	976.55	0.975543
Jurenka Mia	2002	VfL Sindelfingen	571.61	1005.36	0.947604
Veith Manuela	1974	ABC Ludwigshafen	571.83	991.65	0.961075
Liebertz Petra	1960	VfL Wolfsburg	571.92	987.08	0.965677
Amrhein Fabienne	1992	MTG Mannheim	571.95	972.39	0.980317
Amrhein, Fabienne	1992	MTG Mannheim	571.95	972.39	0.980317
Steinmetz Katrin	1966	USC Heidelberg	572.11	998.92	0.954548
Steinmetz, Katja	1966	USC Heidelberg	572.11	1037.64	0.918928
Mohr Christina	1985	Gerolsteiner LGV	572.19	993.77	0.959628
Klein- Arndt Melanie	1975	LAV Bayer Uerdingen/Dorm.	572.27	986.99	0.966356
Heinze Judith	1981	Hallesche LA-Freunde	572.31	995.92	0.957758
Heinig Katharina	1989	LG Eintracht Frankfurt	572.41	1005.55	0.948751
Lange Peggy	1973	LG Olympia Dortmund	572.44	998.2	0.955787
Kramer Nina	1990	LG Hilden	572.67	962.49	0.991647
Tiedemann Anke	1975	SG TSV Kronshagen/KTB	572.73	996.69	0.95772
Tiedemann, Anke	1975	SG TSV Kronshagen/Kieler TB	572.73	996.69	0.95772
Budde, Adia	2005	TSV Altenholz	573.28	1041.2	0.917659
Maier Stephanie	1979	LG Leinfelden-Echterdingen	573.35	973.77	0.981323
Hahner Anna	1989	PSV Grün-Weiß Kassel	573.44	967.33	0.988012
Kühnemund Sylvia	1974	SV Halle	573.59	966.6	0.989016
Clemens Svenja	2002	LG Odenwald	573.69	1006.42	0.950051
Bruns Anne	1974	TV Meppen	574	972.07	0.984154
Islinger Marlene Gomez	1993	SSV Ulm 1846	574.04	994.29	0.962228
Meier Linda	2004	LAC Passau	574.07	979.38	0.976928
Günther Steffi	1984	LAC Erdgas Chemnitz	574.23	1002.71	0.954463
Schöneborn Deborah	1994	LG Nord Berlin	574.71	949.81	1.00846
Lang, Carolin	1986	LC Rothaus Breisgau	576.72	1006.43	0.955059
Hartmann, Karen	1970	Kieler TB	577.55	1030.3	0.934275
Karstens, Verena	1975	Wellingdorfer TV	577.7	1029.89	0.934889
Hahner, Anna	1989	RUN2SKY.com	578.8	967.33	0.997247
Sietz, Karin	1966	LG Wedel/Pinneberg	580.92	1029.8	0.940183
Wolfsperger, Christine	1967	TV Lahr	582.34	1052	0.922592
Östringer, Maren	1974	TSG Wiesloch	583.39	977.03	0.995176
Byrd, Andreina	1978	MTG Mannheim	583.67	1006.62	0.966386
Burmester-Schöler, Beate	1962	LBV Phönix Lübeck	584.2	1006.5	0.967379
Kayßer, Paulina	2000	SC Itzehoe	584.33	985.72	0.987992
Jakobs, Angela	1958	LBV Phönix Lübeck	584.6	1139.3	0.855203
Raupp, Simone	1976	LG Karlsruhe	585.28	1033.5	0.943848
Svensson, Amelie	1996	LG Region Karlsruhe	585.57	1078.93	0.904554
Grüner, Olivia	1969	LT Radolfszell	587.64	1002.41	0.977045
Braun, Jutta	1956	TV 1893 Rheinau	587.8	1025.4	0.9554
Zipse, Manuela	1974	LC Rothaus Breisgau	588.31	995.88	0.984573
Winckler, Kerstin	1968	Kieler TB	588.84	1084.6	0.90485
Kaiser, Sophia	1996	LG Region Karlsruhe	589	1047.53	0.937125
Flacke, Johanna	1998	LG Region Karlsruhe	590.57	1042.89	0.943804
Schaubhut, Anja	1980	Freiburger FC	590.78	1036.03	0.950391
Rußhardt, Katja	1964	TV Staufen	591.3	1076.9	0.915127
Schlosser, Doris	1944	LG Coop Kurpfalz	591.6	1023	0.963832
Ambrosy, Sonja	1970	LC Breisgau	591.91	1036	0.952236
Edmeier, Andrea	1982	TV Rheinfelden	592.96	1036.03	0.953898
Schmitt, Brigitte	1946	VfL Mosbach-Elzach	593	1036.8	0.953254
Tremmel, Tina	1981	MTG Mannheim	593.07	1013.77	0.975024
Wagner, Sabrina	1988	LG Offenburg	593.21	1026.17	0.963469
Hormann, Stefanie	1967	LBV Phönix Lübeck	593.3	1030.2	0.959846
Huber, Gertrud	1954	TuS Neureut	593.7	1042.4	0.949252
Moser, Valerie	1998	Running Team Ortenau	593.71	1057.52	0.935695
Hettich, Sarah	1991	LG Region Karlsruhe	594.2	1070.19	0.925381
Adler, Christin	1992	SG TSV Kronshagen/Kieler TB	594.6	1041.28	0.951713
Adler, Nicole	1992	SG TSV Kronshagen/Kieler TB	595.4	1027.11	0.966141
Löffler, Sabine	1968	LG Hardt	596.09	1038.6	0.95656
Mensing, Felicitas	1984	LV Biet	596.37	1050.3	0.946349
Knudsen, Dagmar	1956	LAV Husum	596.4	1008.7	0.985427
Hoss, Hanna	1994	LC Rothaus Breisgau	596.48	1068.8	0.93014
Brod, Jutta	1973	TV Konstanz	598.32	1012.54	0.98485
Kirschke-Deck, Viola	1967	TSG 78 Heidelberg	599.34	1059.24	0.943035
Willaredt, Andrea	1964	TV Herbolzheim	599.75	1099	0.909539
Knörr, Laura	1992	TV Konstanz	600.32	1068.69	0.936224
Richter, Rhea	1986	LG MTV/Gut Heil Itzehoe	600.54	1051.21	0.952141
Greinert, Sabine	1973	TSV Böklund	600.62	1087.24	0.920711
Falkenberg, Anja	1969	LSG Karlsruhe	601.38	1046.12	0.958112
Strothmann, Kristin	1964	LG Elmshorn	603.2	1086.5	0.925295
Wolf, Ursula	1963	TV 1893 Rheinau	605.63	1034.6	0.975627
Timm, Svea	2001	LAC Kronshagen	605.81	1055.72	0.956393
Hoeltz, Ulrike	1961	LSG Karlsruhe	606.34	1048.02	0.964263
Riedemann, Julia-Marie	1991	LBV Phönix Lübeck	606.59	1093.4	0.924623
Schleifer, Christine	1983	LV Biet	606.68	1041.92	0.970452
Ott, Ulrike	1961	TV Konstanz	606.69	1073.82	0.941638
Knirsch, Lena	1996	LG Region Karlsruhe	606.83	1079.47	0.936926
Röhrnbacher, Inge	1947	LSG Karlsruhe	607.2	1037.8	0.97514
Hellmann, Tanja	1992	LG Region Karlsruhe	607.44	1078.44	0.938763
Mannsdörfer, Katrin	1986	LC 80 Pforzheim	607.64	1061.19	0.954337
Ulrich, Uta	1966	LBV Phönix Lübeck	607.81	1074.8	0.942516
Krischke, Johanna	1997	LG Region Karlsruhe	607.86	1099.19	0.921679
Sülzle, Anja	1971	LC 80 Pforzheim	608	1044.69	0.969985
Hüttner, Inge	1943	TV 1893 Rheinau	608.3	1064.9	0.952046
Behrend, Birgit	1969	Kieler TB	608.4	1065.54	0.95163
Zentner, Lidia	1953	Gazelle Pforzheim/Königsbach	609.01	1042.8	0.973357
Ehlers, Maria	1951	TSV Ratekau	609.1	1054.34	0.962846
Richter, Christine	1964	Bramstedter TS	609.4	1063.6	0.954933
Antoni, Sharon	1995	ETSV Lauda	610.87	1083.9	0.939309
Ali, Rubina	1978	LG Hardt	610.9	1072.63	0.949224
Ziegler, Lisa	1994	TV 1847 Bühl	611.85	1003.83	1.01586
Rübhausen, Claudia	1966	SV Rugenbergen	612.67	1174	0.869776
Steiger, Karin	1974	LC Breisgau	613.83	1044.15	0.979792
Stadel, Inge	1966	LAV Husum	614.12	1094.9	0.934819
Benz, Marion	1970	TB Emmendingen	614.57	1061.2	0.965212
Müller, Larissa	1992	MTG Mannheim	614.61	1089.59	0.940124
Begau, Cornelia	1964	TSV Neustadt	614.8	1093.3	0.937224
Kratzenstein, Claudia	1981	SG TSV Kronshagen/Kieler TB	616.61	1068.92	0.961422
Hirsch, Carmen	1956	LAV Husum	619.2	1113.5	0.926807
von der Fecht, Solveig	1975	Halstenbeker TS	621.41	1107.1	0.935492
Salomon, Gudrun	1941	LG Kiel	624.16	1078.9	0.964192
Müller, Urte	1967	LAV Husum	627.1	1098.5	0.951449
Wolff, Anja-Katariina	1978	Halstenbeker TS	627.72	1114.2	0.93897
Martens, Daniela	1977	LG MTV/Gut Heil Itzehoe	628.04	1185.2	0.88317
Carstensen, Anita	1960	LG RW Niebüll/TSV Süderlügum	628.3	1073.7	0.975288
Schuster(-Dörscher), Christine	1975	SG TSV Kronshagen/Kieler TB	629.34	1092.95	0.959696
Petersen, Anja	1971	TSV Drelsdorf	631.98	1104.2	0.953903
Humfeldt, Barbara	1969	LG MTV/Gut Heil Itzehoe	633.6	1099.1	0.960786
Becker, Verena	1977	SG TSV Kronshagen/Kieler TB	635.4	1099.57	0.963104
Kroeseler, Sabine	1958	LBV Phönix Lübeck	635.97	1126.5	0.940923
Wellbrock, Nele	2000	SG TSV Kronshagen/Kieler TB	636	1027.89	1.03124
Hauke, Charlotte	1939	LG Kiel	636.4	1089.63	0.973419
Mathias, Diana	1973	LG Wedel/Pinneberg	636.6	1117.29	0.949619
Johannsen, Verena	1968	LG Wedel/Pinneberg	637.29	1107.2	0.959312
Simon, Hilke	1967	LG Rönnau/Quellenhaupt	641.15	1157.9	0.922863
Mahrt, Sünje	1966	TSV Drelsdorf	641.84	1176.2	0.909483
Eising, Annette	1965	Kaltenkirchener TS	642.1	1174.2	0.911401
Thiesen, Andrea	1966	LAV Husum	644.2	1123.6	0.95556
Prieske, Anna	1991	Spiridon-Club Bad Oldesloe	644.47	1128.72	0.951624
Schröder, Melinda	1997	TSV Zarpen	644.53	1155.68	0.92951
Becker, Frauke	1968	LG TEFT	645.2	1119.9	0.960205
Langbehn, Karin	1950	Rendsburger TSV	647.04	1142.3	0.94406
Becker, Inge	1968	LG TEFT	649.2	1120.4	0.965727
Weber, Ingrid	1950	TSV Glücksburg 09	649.2	1098	0.985428
Lorenzen, Uta	1967	Kieler TB	651.06	1190.1	0.911772
Konjack, Ingeborg	1944	LG Elmshorn	651.6	1131.9	0.959449
Krüger, Dagmar	1946	LG GH Neum./TSV Kronshagen	652	1154.4	0.941326
Hintz, Ursel	1967	LAV Husum	653.6	1133.4	0.96112
Treuschel, Ingeburg	1961	Krummesser SV	653.7	1153.6	0.944435
Piel, Katja	1971	TSV Kappeln	654.23	1153.2	0.945528
Beck, Corinna	1994	SG TSV Kronshagen/Kieler TB	654.32	1121.96	0.971989
Braun, Simone	1970	TSV Klausdorf 30.09.17 Flensburg	654.9	1131.7	0.964478
Marquardt, Britta	1978	LBV Phönix Lübeck	655.39	1145.8	0.953322
Schubert, Ariane	1958	TuS Gaarden	655.5	1159	0.942623
Luck, Julia	1983	LG Wedel/Pinneberg	656.4	1131.54	0.966824
Zembold, Meike	2002	LAC Kronshagen	656.6	1157	0.945837
Karthaus, Jasmin	1996	SG TSV Kronshagen/Kieler TB	658.5	1162.07	0.944435

## Sheet: 5000-10000
name, first name	date or year of birth	nation or club	sec 5000m	sec 10,000m	KsA
GIDEY Letesenbet	20 MAR 1998	ETHETH	846.62	1741.03	0.972551
DIBABA Tirunesh	01 OCT 1985	ETHETH	851.15	1782.56	0.954975
TSEGAY Gudaf	1997-06-23	ETHETH	852.29	1769.73	0.963186
AYANA Almaz	1991-11-21	ETHETH	852.59	1757.45	0.970258
DEFAR Meseret	1983-11-19	ETHETH	852.88	1799.2	0.948066
TAYE Ejgayehu	2000-02-10	ETHETH	852.98	1797.45	0.9491
HASSAN Sifan	1993-01-01	NEDNED	853.42	1746.82	0.977113
TEFERI Senbere	03 MAY 1995	ETHETH	855.24	1840.59	0.929311
OBIRI Hellen	13 DEC 1989	KENKEN	858.37	1810.02	0.948465
MONSON Alicia	13 MAY 1998	USAUSA	859.45	1803.82	0.952922
TIROP Agnes Jebet	23 OCT 1995	KENKEN	860.68	1825.2	0.943108
CHERUIYOT Vivian Jepkemoi	1983-09-11	KENKEN	860.87	1772.53	0.971346
KIPKEMBOI Margaret Chelimo	1993-02-09	KENKEN	863.67	1810.07	0.954295
SHOBUKHOVA Liliya	1977-11-13	RUSRUS	863.75	1829.36	0.944319
ABEYLEGESSE Elvan	1982-09-11	TURTUR	864.68	1821.67	0.949327
NIYONSABA Francine	05 MAY 1993	BDIBDI	865.34	1841.93	0.939601
SCHWEIZER Karissa	04 MAY 1996	USAUSA	866.34	1818.05	0.953043
KLOSTERHALFEN Konstanze	1997-02-18	GERGER	866.76	1861.71	0.931144
KIPKIRUI Caroline Chepkoech	26 MAY 1994	KENKEN	867.55	1817.64	0.954589
MCCOLGAN Eilish	1990-11-25	GBRGBR	868.55	1800.86	0.964595
RADCLIFFE Paula	17 DEC 1973	GBRGBR	869.11	1801.09	0.965093
ADERE Berhane	1973-11-23	ETHETH	869.32	1804.18	0.963673
GEMECHU Tsehay	12 DEC 1998	ETHETH	869.6	1819.29	0.955977
DONG Yanmei	1977-02-16	CHNCHN	869.82	1838.09	0.946439
KIPYEGO Sally	19 DEC 1985	KENKEN	870.42	1826.37	0.953169
CHERONO Eva	1996-08-15	KENKEN	870.77	1849.23	0.941765
WAMI Gete	11 DEC 1974	ETHETH	870.88	1822.48	0.955709
GRØVDAL Karoline Bjerkeli	1990-06-14	NORNOR	871.07	1850.84	0.94127
MASAI Linet Chepkwemoi	05 DEC 1989	KENKEN	871.14	1826.5	0.95389
BURKA Gelete	1986-01-23	ETHETH	871.2	1826.66	0.953872
KIBET Sylvia Jebiwot	28 MAR 1984	KENKEN	871.91	1847.2	0.944034
MELKAMU Meselech	1985-04-19	ETHETH	871.91	1793.8	0.972137
LIU Shixiang	1971-01-13	CHNCHN	872.33	1855.83	0.940097
DIBABA Ejegayehu	21 MAR 1982	ETHETH	872.74	1818.39	0.959904
KIDANE Werknesh	1981-01-07	ETHETH	873.04	1807.15	0.966206
WANGUI Lucy Kabuu	24 MAR 1984	KENKEN	873.49	1839.96	0.949466
FEYSA Hawi	1999-02-01	ETHETH	873.66	1863.32	0.937746
MASAI Edith	1967-04-04	KENKEN	873.84	1830.26	0.954881
HAILU Lemlem	25 MAY 2001	ETHETH	874.53	1799.15	0.972159
CHERONO Priscah Jepleting	1980-06-27	KENKEN	875.3	1856.43	0.942993
RIBEIRO Fernanda	1969-06-23	PORPOR	876.45	1822.88	0.96161
DANIEL Rahel	2001-11-16	ERIERI	876.66	1812.15	0.967536
CAN Yasemin	11 DEC 1996	TURTUR	876.82	1826.41	0.960157
AUGUSTO Jessica	1981-11-08	PORPOR	877.07	1879.15	0.933475
KRISTIANSEN Ingrid	21 MAR 1956	NORNOR	877.33	1813.74	0.967426
KONOVALOVA Mariya	1974-08-14	RUSRUS	878.09	1831.03	0.959121
AYALEW Wude	1987-07-04	ETHETH	878.44	1811.87	0.96965
SAINA Betsy	1988-06-30	KENKEN	879.49	1807.78	0.973006
NAWOWUNA Alice Aprot	1994-01-02	KENKEN	879.56	1793.51	0.980825
MALOT Leah	1972-06-07	KENKEN	879.83	1857.7	0.947225
PAVEY Joanne	1973-09-20	GBRGBR	879.96	1853.2	0.949665
YIN Lili	1979-11-11	CHNCHN	879.96	1839.98	0.956489
KIPLAGAT Florence	1987-02-27	KENKEN	880.14	1811.53	0.971709
SUN Yingjie	1979-01-19	CHNCHN	880.41	1807.2	0.974336
CHELANGAT Sheila	1998-04-11	KENKEN	880.51	1870.27	0.941586
CHELANGAT Sarah	2001-06-05	UGAUGA	880.88	1866.46	0.943905
O'SULLIVAN Sonia	1969-11-28	IRLIRL	881.02	1847.59	0.953696
KORIKWIANG Pauline Chemning	01 MAR 1988	KENKEN	881.28	1866.29	0.944419
BATTOCLETTI Nadia	2000-04-12	ITAITA	881.3	1866.42	0.944375
YESHANEH Ababel	1991-07-22	ETHETH	881.58	1835.91	0.960374
MIKITENKO Irina	1972-08-23	GERGER	882.03	1889.55	0.933587
OLJIRA Belaynesh	1990-06-26	ETHETH	882.57	1826.7	0.9663
NAWOWUNA Grace Loibach	2003-11-10	KENKEN	882.63	1787.42	0.987602
HUDDLE Molly	1984-08-31	USAUSA	882.64	1813.17	0.973588
DIDA Dera	26 OCT 1996	ETHETH	882.84	1851.86	0.953463
HAROYE Alemitu	09 MAY 1995	ETHETH	883.28	1850.83	0.954469
CHEPTAI Irine Chepet	1992-02-04	KENKEN	883.42	1844	0.958156
XING Huina	1984-02-25	CHNCHN	883.64	1824.36	0.968712
GEBRESELAMA Tsigie	2000-09-30	ETHETH	883.9	1804.45	0.979689
MAURY Margaret	15 MAY 1974	FRAFRA	883.9	1921.01	0.920245
MEYER Elana	10 OCT 1966	RSARSA	884.05	1852.51	0.954435
ONGORI Philes	1986-07-19	KENKEN	884.2	1878.85	0.941214
UTURA Sule	1990-02-08	ETHETH	884.21	1855.5	0.953069
TULU Derartu	21 MAR 1972	ETHETH	884.22	1817.49	0.973012
WAMBUI Eveline Nganga	1986-04-04	KENKEN	884.49	1874.08	0.943919
BRUNET Roberta	20 MAY 1965	ITAITA	884.5	1932.13	0.91557
FLANAGAN Shalane	1981-07-08	USAUSA	884.8	1822.22	0.971123
WANJIRU Veronica	29 OCT 1989	KENKEN	884.82	1867.56	0.947568
VAQUERO Julia	1970-09-18	ESPESP	884.95	1874.51	0.944193
LAN Lixin	1979-02-14	CHNCHN	885.33	1839.41	0.962624
SONG Liqing	1980-01-20	CHNCHN	885.71	1871.26	0.946646
SMITH Kimberley	1981-11-19	NZLNZL	885.93	1835.54	0.965307
LOROUPE Tegla	09 MAY 1973	KENKEN	885.95	1832.03	0.967178
GEBRZIHAIR Girmawit	2001-11-21	ETHETH	886.12	1823.69	0.971788
ALEM Mizan	2002-01-22	ETHETH	886.2	1799.03	0.985198
GETACHEW Senayet	01 OCT 2005	ETHETH	886.25	1859.39	0.95327
CHECA Dolores	27 DEC 1982	ESPESP	886.3	1942.21	0.912672
BARSOSIO Sally	21 MAR 1978	KENKEN	886.71	1875.38	0.945632
CHEBET Emily	1986-02-18	KENKEN	886.89	1847.02	0.960347
TIMBILILI Alice Jemeli	1983-02-01	KENKEN	887.06	1883.99	0.941682
CHERONO Gladys	12 MAY 1983	KENKEN	887.12	1829.23	0.969938
HENES Elly	13 OCT 1998	USAUSA	887.15	1848.26	0.959984
DONG Zhaoxia	1974-11-13	CHNCHN	887.2	1847.22	0.960579
WILLIS-JOHNSON Benita	06 MAY 1979	AUSAUS	887.6	1837.68	0.966001
PROKOPČUKA Jeļena	1976-09-21	LATLAT	887.71	1838.78	0.965542
KRAVTSOVA Olga	1981-07-25	BLRBLR	887.75	1918.52	0.925453
MINSEWO Abersh	2001-02-22	ETHETH	887.98	1873.53	0.947922
CRANNY Elise	09 MAY 1996	USAUSA	888.02	1814.66	0.978718
BUSIENEI Selah	27 DEC 1991	KENKEN	888.24	1826.4	0.972668
KAMAU Tabithanjeri	2000-07-03	KENKEN	888.26	1877.4	0.946266
LEGHZAOUI Asmae	1976-08-30	MARMAR	888.31	1876.94	0.946551
DOMÍNGUEZ Marta	1975-11-03	ESPESP	888.33	1851.69	0.95948
YALEW Genet	31 DEC 1992	ETHETH	888.43	1837.38	0.967062
WANG Dongmei	03 DEC 1972	CHNCHN	888.45	1847.72	0.961672
WIGENE Susanne	1978-02-12	NORNOR	888.53	1832.36	0.96982
KITE Gloria	1998-01-10	KENKEN	889.22	1873.04	0.949494
KIPCHUMBA Irene Kwambai	25 OCT 1978	KENKEN	889.32	1855.67	0.958489
GALVÁN Laura	05 OCT 1991	MEXMEX	889.34	1864.08	0.954187
MCKIERNAN Catherina	1969-11-30	IRLIRL	889.4	1868.41	0.952039
BAHTA Meraf	1989-06-24	SWESWE	889.95	1868.05	0.952812
FRERICHS Courtney	1993-01-18	USAUSA	890.06	1883.13	0.945299
MOMANYI Grace	1981-02-13	KENKEN	890.77	1868.24	0.953593
INFELD Emily	21 MAR 1990	USAUSA	890.9	1868.57	0.953563
KRUMINS Susan	1986-07-08	NEDNED	891.25	1865.4	0.955559
KASTOR Deena	1973-02-14	USAUSA	891.62	1850.32	0.963747
TUFA Mestawat	1983-09-14	ETHETH	891.72	1838.33	0.970141
WANG Junxia	1973-01-09	CHNCHN	891.87	1771.78	1.00675
SCHNEIDER Rachel	1991-07-18	USAUSA	892.04	1869.79	0.954161
HIRONAKA Ririka	2000-11-24	JPNJPN	892.84	1839.71	0.970631
GEZAHEGNE Kalkidan	08 MAY 1991	BRNBRN	892.92	1790.77	0.997247
NIYOMUKUNZI Francine	1999-08-01	BDIBDI	893.02	1887.47	0.946261
FUKUSHI Kayoko	25 MAR 1982	JPNJPN	893.22	1851.81	0.964699
KELATI FREZGHI Weini	01 DEC 1996	USAUSA	893.41	1864.16	0.958512
TEFERI Selamawit	24 MAR 1994	ISRISR	893.43	1879.5	0.95071
YEHUALAW Yalemzerf	1999-08-03	ETHETH	893.77	1820.77	0.981749
SISSON Emily	12 OCT 1991	USAUSA	893.84	1849.57	0.966538
CHEPKIRUI Sheila	27 DEC 1990	KENKEN	894.05	1845.81	0.968735
TWELL Stephanie	1989-08-17	GBRGBR	894.08	1868.13	0.957192
ARTYOMOVA Natalya	1963-01-05	URSURS	894.08	1916.33	0.933117
WELLINGS Eloise	1982-11-09	AUSAUS	894.11	1874.94	0.953748
KAMULU Pauline	30 DEC 1994	KENKEN	894.19	1820.97	0.982103
MULATIE Bosena	2001-11-21	ETHETH	894.22	1817.77	0.983865
RHINES Jennifer	1974-07-01	USAUSA	894.29	1877.31	0.952736
MOREIRA Sara	17 OCT 1985	PORPOR	894.71	1872.93	0.955412
CHEPKURUI Lineth	1987-02-23	KENKEN	895	1884.2	0.950005
GOUCHER Kara	1978-07-09	USAUSA	895.02	1855.16	0.964898
ROGERS Natosha	07 MAY 1991	USAUSA	895.39	1848.69	0.968675
KLIMINA Viktoriya	01 MAR 1976	RUSRUS	895.55	1873.5	0.956018
UHL Lisa	1987-08-31	USAUSA	895.74	1872.8	0.956578
BONDARENKO Olga	1960-06-02	URSURS	895.76	1857.21	0.96463
NIIYA Hitomi	1988-02-26	JPNJPN	895.83	1820.44	0.984191
RUDOLPH Amy	1973-09-18	USAUSA	896.04	1878.96	0.953762
SANDELL Annemari	1977-01-02	FINFIN	896.22	1900.42	0.943181
KIROS Aheza	16 OCT 1985	ETHETH	896.33	1866.93	0.960218
KIPLAGAT Lornah	01 MAY 1974	NEDNED	896.43	1812.53	0.989148
CHEROTICH Daisy	30 MAY 1997	KENKEN	896.46	1837.31	0.97584
MARKOVC Amy-Eloise	1995-08-05	GBRGBR	896.6	1877.81	0.954942
YODER BEGLEY Amy	1978-01-11	USAUSA	896.72	1873.78	0.957124
MURRAY Yvonne	04 OCT 1964	GBRGBR	896.94	1916.97	0.935789
SECCAFIEN Andrea	1990-08-27	CANCAN	897.07	1873.94	0.957416
JUDD Jess	1995-01-07	GBRGBR	897.19	1835.93	0.977368
GEBRESLASE Gotytom	1995-01-15	ETHETH	897.33	1874.52	0.957397
MAAMA-YVELAIN Fatima	31 DEC 1969	FRAFRA	898.18	1903.29	0.943818
BUSCOMB Camille	1990-07-11	NZLNZL	898.59	1873.21	0.959412
WESSEL Kathrin	1967-08-14	GERGER	898.71	1863.62	0.964478
Ullrich Andrea Kathrin	1967	SC Berlin	898.71	1863.62	0.964478
GUIDA Maria	1966-01-23	ITAITA	898.84	1887.82	0.952252
SALPETER Lonah Chemtai	12 DEC 1988	ISRISR	899.02	1846.37	0.973824
SCOTT Dominique	1992-06-24	RSARSA	899.08	1860.1	0.966701
BERKUT Nataliya	30 MAY 1975	UKRUKR	899.26	1868.89	0.962347
ZHILYAYEVA Alla	1969-02-05	RUSRUS	899.46	1823.07	0.986753
MCCOLGAN Liz	24 MAY 1964	GBRGBR	899.56	1857.07	0.968795
ROMANOVA Yelena	20 MAR 1963	URSURS	899.7	1906.83	0.94366
BOGOMOLOVA Galina	15 OCT 1977	RUSRUS	899.72	1826.2	0.985347
MOCKENHAUPT Sabrina	06 DEC 1980	GERGER	899.88	1874.21	0.960277
SAEED MOHAMMED Alia	18 MAY 1991	UAEUAE	900.45	1870.25	0.962919
ALEMU Derebe	1983-06-05	ETHETH	900.56	1864.49	0.966012
CHESANG Stella	01 DEC 1996	UGAUGA	900.72	1861.04	0.967975
MONTEIRO Inês	18 MAY 1980	PORPOR	901.06	1873.58	0.961859
LOBUN Hellen Ekalale	18 MAR 1999	KENKEN	901.14	1882.89	0.957188
GODFAY Afera	1991-09-25	ETHETH	901.2	1868.23	0.964763
KOSGEI Salina Jebet	1976-11-16	KENKEN	901.79	1887.83	0.955372
BLEASDALE Julia	1981-09-09	GBRGBR	902	1855.63	0.972177
SZENTGYÖRGYI Katalin	1979-01-01	HUNHUN	902	1947.69	0.926225
GUSKOVA Svetlana	1957-08-19	URSURS	902.12	1902.43	0.948387
HALL Marielle	1992-01-28	USAUSA	902.27	1865.71	0.967214
ERKESSO Teyba	30 OCT 1982	ETHETH	902.28	1873.67	0.963115
BEKELE Bezunesh	1983-01-29	ETHETH	902.48	1870.68	0.964868
WEISSTEINER Silvia	1979-07-13	ITAITA	902.65	1929.26	0.935747
NAGOVITSYNA Yelena	07 DEC 1982	RUSRUS	902.8	1922.99	0.938954
ESHETE Shitaye	21 MAY 1990	BRNBRN	903.13	1847.25	0.97781
OCKENDEN Verity	1991-08-31	GBRGBR	903.51	1903.7	0.949215
MELLY Joan Chelimo	1990-11-10	ROUROU	903.6	1910.52	0.94592
REH Alina	23 MAY 1997	GERGER	904.1	1879.87	0.961875
PIPPIG Uta	1965-09-07	GERGER	904.87	1881.36	0.961932
LAHTI Sarah	1995-02-18	SWESWE	904.87	1871.12	0.967196
DIAS Maria Albertina	1965-04-26	PORPOR	905.12	1893.03	0.956266
ULMASOVA Svetlana	1953-02-04	URSURS	905.5	1934.83	0.936
BUTLER Kathy	22 OCT 1973	GBRGBR	905.51	1896.9	0.954726
INGLIS Sarah	1991-08-28	GBRGBR	905.51	1899.6	0.953369
POPKOVA Natalya	1988-09-21	RUSRUS	905.95	1915.83	0.945752
OLTEANU-NEGURA Iulia	1967-01-26	ROUROU	906.73	1860.25	0.974847
CLITHEROE Helen	1974-01-02	GBRGBR	906.75	1931.29	0.93901
CUNHA Aurora	31 MAY 1959	PORPOR	906.96	1889.41	0.960046
AGAFONOVA Kseniya	04 MAR 1983	RUSRUS	906.98	1868.53	0.970795
BASTOS Marina	1971-07-07	PORPOR	907.29	1901.38	0.954349
GORECKA Emelia	1994-01-29	GBRGBR	907.45	1959.37	0.926267
VAN ES Diane	22 MAR 1999	NEDNED	907.52	1862.24	0.974654
CALVIN Clémence	17 MAY 1990	FRAFRA	907.58	1912.86	0.948925
LOKAR Claudia	1964-02-09	GERGER	907.62	1917.9	0.946473
Lokar Claudia Margareta	1964	LG Olympia Dortmund	907.62	1917.9	0.946473
TOONSTRA Christine	1966-06-22	NEDNED	907.68	1903.55	0.953671
FÉLIX Dulce	23 OCT 1982	PORPOR	908.02	1879.03	0.966477
FRANKIEWICZ Wioletta	1977-06-09	POLPOL	908.38	1936.27	0.938278
PAPP Krisztina	17 DEC 1982	HUNHUN	908.65	1906.47	0.953228
BOTEZAN-PRUNDUS Mihaela Maria	1976-11-21	ROUROU	908.78	1871.24	0.971313
OLAFSSON Loa	1958-01-29	DENDEN	908.8	1905.4	0.95392
HALLE-HAUGEN Gunhild	1972-06-01	NORNOR	909	1907.89	0.952885
DAVENPORT-MCMAHON Marie	1975-01-24	IRLIRL	909.07	1888.78	0.9626
ALEKSANDROVA Galina	15 OCT 1975	RUSRUS	909.61	1931.52	0.941859
GHICAN Viorica	1965-06-09	ROUROU	909.9	1878.18	0.968917
BOLTZ Jill	14 OCT 1966	GBRGBR	909.98	1867.88	0.974345
KÁLOVICS Anikó	13 MAY 1977	HUNHUN	910.21	1900.31	0.957959
BELETE Almenesh	1989-07-26	BELBEL	910.24	1903.05	0.956612
PUMPER Susanne	1970-09-01	AUTAUT	910.54	1932.33	0.942427
SANTIAGO SÁNCHEZ Beatriz	28 OCT 1968	ESPESP	911.01	1932.6	0.942782
JEVTIĆ Olivera	1977-07-24	YUGYUG	911.25	1889.65	0.964464
RICHARDSSON Camilla	1993-09-14	FINFIN	911.63	1872.78	0.973558
DANDOLO Nadia	1962-09-11	ITAITA	911.64	1922.37	0.948454
RECIO Teresa	1963-07-07	ESPESP	912.06	1903.8	0.958147
DENNEHY-WILLIS Breeda	1970-02-02	IRLIRL	912.83	1931.3	0.945301
CAUNE Agate	2004-08-07	LATLAT	912.94	1915.79	0.953069
BRITTON Fionnula	1984-09-24	IRLIRL	912.97	1889.22	0.966505
TOOBY Angela	24 OCT 1960	GBRGBR	913.22	1915.3	0.953605
NAUER Daria	21 MAY 1966	SUISUI	913.93	1895.96	0.964082
BITZNER-DUCRET Blandine	01 DEC 1965	FRAFRA	913.96	1913.38	0.955336
HARVEY Natalie Anne	1975-01-19	GBRGBR	914.08	1934.01	0.945269
IVANOVA Marina	1982-01-19	RUSRUS	914.57	1879.54	0.973185
KOROBKINA Yelena	1990-11-25	RUSRUS	914.67	1936.01	0.944902
BALSAMO Agata	1970-11-11	ITAITA	914.7	1916.49	0.954558
ABITOVA Inga	06 MAR 1982	RUSRUS	915.05	1831.42	0.999279
WASSILUK Petra	27 OCT 1969	GERGER	915.17	1912.2	0.957191
IAKOVOU Chrysostomia	1971-04-09	GREGRE	915.32	1938.62	0.944301
ARYASOVA Tatyana	1979-04-02	RUSRUS	915.4	1864.88	0.981725
JAVORNIK Helena	26 MAR 1966	SLOSLO	915.4	1866.63	0.980805
SAMOKHVALOVA Alena	1980-11-21	RUSRUS	915.75	1872.57	0.978068
TIKKANEN Päivi	1960-01-19	FINFIN	915.76	1905.02	0.961418
VASTENBURG Jip	21 MAR 1994	NEDNED	915.77	1895.48	0.966267
SLEGERS Lieve	1965-04-06	BELBEL	916.1	1903.36	0.962613
BOBOCEL Ancuţa	03 OCT 1987	ROUROU	916.13	1903.12	0.962766
MATVEYEVA Lyudmila	1957-02-01	URSURS	916.27	1898.02	0.965501
Köster Dörte	1973	SC Empor Rostock	916.32	1966.63	0.931868
POZDNYAKOVA Tetyana	04 MAR 1956	URSURS	916.37	1908.94	0.960083
FATES Farida	1962-02-02	FRAFRA	916.41	1918.63	0.955275
YELLING Hayley	1974-01-03	GBRGBR	916.44	1905.14	0.962071
SERGENT-PALLUY Annette	1962-11-17	FRAFRA	916.44	1911.68	0.95878
GEGA Luiza	1988-11-05	ALBALB	916.47	1936.25	0.946644
EJJAFINI Nadia	1977-11-08	ITAITA	916.54	1905.14	0.962176
SOROKOVSKAYA Natalya	1962-07-23	URSURS	916.83	1906.43	0.961829
GRIGORYEVA Lidiya	1974-01-21	RUSRUS	917.21	1832.72	1.00093
MOROIANU Rodica Daniela	1970-11-18	FRAFRA	917.31	1947.81	0.941889
SKVORTSOVA Silviya	1974-11-16	RUSRUS	917.35	1941.89	0.944801
NESBITT Jennifer	1995-01-24	GBRGBR	917.39	1958.45	0.936853
SOKOLOVA Yelena	27 DEC 1979	RUSRUS	918.01	1909.47	0.961534
KASHAPOVA Klara	1970-01-29	RUSRUS	918.09	1915.99	0.958345
GRUCA Dorota	05 DEC 1970	POLPOL	918.75	1912.11	0.96098
WOLDU Mekdes	20 OCT 1992	FRAFRA	918.77	1931.72	0.951246
VICECONTE Maura	03 OCT 1967	ITAITA	918.8	1865.57	0.985007
FAZLITDINOVA Gulshat	1992-08-28	RUSRUS	918.88	1921.83	0.956255
DOMORADSKAYA Anna	1953-11-17	URSURS	919	1908.23	0.963196
CULLEN Mary Teresa	1982-08-17	IRLIRL	919.04	1941.42	0.946771
RENDERS Marleen	24 DEC 1968	BELBEL	919.2	1863.6	0.986478
TESKE Charlotte	1949-11-23	FRGFRG	919.54	1920.26	0.957724
PETROVA Lyudmila	07 OCT 1968	RUSRUS	920.44	1896.76	0.970539
SOMMAGGIO Silvia	1969-11-20	ITAITA	920.89	1884.12	0.977528
ROSA Mónica	05 MAY 1978	PORPOR	921.01	1942.25	0.948395
SLY Wendy	1959-11-05	GBRGBR	921.45	1913.36	0.963175
LEHMANN-VEITH Gabriele	24 OCT 1956	GDRGDR	921.9	1937.22	0.951776
Veith Gabriele	1956	SC Cottbus	921.9	1937.22	0.951776
DATTKE Miriam	1998-06-24	GERGER	922.03	1870.21	0.986018
HARRISON Samantha	1995-02-01	GBRGBR	922.29	1871.4	0.985668
INGLESE Veronica	1990-11-22	ITAITA	922.45	1897.43	0.972315
DE VOS Nathalie	09 DEC 1982	BELBEL	922.68	1882.8	0.980115
Kock Maren	1990	LG TF Regensburg	922.75	1994.32	0.925378
KARLSHØJ Gitte	14 MAY 1959	DENDEN	922.95	1946.25	0.948439
BIKTASHEVA Lyudmila	1974-07-25	RUSRUS	922.98	1864	0.990322
VYAZOVA Yelena	1960-04-18	URSURS	923.25	1869.4	0.98775
PURDUE Charlotte	1991-06-10	GBRGBR	923.4	1923.55	0.9601
TECUŢĂ-GHERASIM Camelia Alina	1971-11-10	ROUROU	923.43	1908.28	0.967814
SCHÄFER Monika	06 OCT 1959	GERGER	923.46	1947.89	0.948164
VERÉBNÉ FAZEKAS Erika	23 OCT 1963	HUNHUN	923.54	1934.5	0.95481
PROKOPEVA Alina	1985-08-16	RUSRUS	923.78	1917.38	0.963586
PUCHKOVA Natalya	1987-01-28	RUSRUS	924	1922.67	0.961163
MARTIN Jessica	01 OCT 1992	GBRGBR	924.02	1895.92	0.974746
DAUNAY Christelle	05 DEC 1974	FRAFRA	924.48	1895.81	0.975288
SIPATOVA Yelena	1955-06-07	URSURS	924.6	1937.2	0.954574
GALYAMOVA Nadezhda	1959-07-22	URSURS	924.65	1923.07	0.961639
RUIZ Cristina	1999-01-16	ESPESP	925.11	1928.7	0.959309
MURCIA Rosario	1964-09-23	FRAFRA	925.33	1902.83	0.972583
NADOLSKA Karolina	1981-09-06	POLPOL	925.52	1903.51	0.972435
AVERY Kate	10 OCT 1991	GBRGBR	925.63	1901.44	0.973609
OPPLIGER Martine	19 OCT 1957	SUISUI	925.84	1927.49	0.960669
BARRACHINA FERNANDEZ Gemma	1986-04-10	ESPESP	925.88	1914.64	0.967158
MURRAY Freya	1983-09-20	GBRGBR	926.05	1943.44	0.953001
BIBA-PÖSCHL Iris	27 MAY 1964	GERGER	926.24	1912.09	0.968825
Biba Iris Gerda	1964	Eintracht Frankfurt	926.24	1892.09	0.979065
DIAS Ana	1974-01-15	PORPOR	926.41	1899.52	0.975415
Bibernell Ines	1965	SC Chemie Halle	927.05	1952.28	0.94971
AUCKLAND Rhona	11 MAY 1993	GBRGBR	927.6	1942.79	0.954915
POTTER Elizabeth	27 DEC 1991	GBRGBR	928.32	1923.45	0.965266
YAMAUCHI Mara	1973-08-13	GBRGBR	928.58	1909.4	0.972641
WALLACE Andrea	1966-11-22	GBRGBR	928.63	1941.61	0.956557
TAYLOR Charlotte	1994-01-17	GBRGBR	929.07	1931.8	0.96187
REED Kate	1982-09-28	GBRGBR	929.1	1895.77	0.980182
COULSON Jessica	1990-04-18	GBRGBR	929.5	1961.59	0.947701
ARTER Charlotte	1991-06-18	GBRGBR	930.35	1935.71	0.961249
WOOTTON Katrina	1985-09-02	GBRGBR	930.82	1947.47	0.955927
Schulz Melanie	1979	SV Creaton Großengottern	931.67	1960.09	0.95064
HOLLAND Julie	1966-01-20	GBRGBR	931.78	1967.78	0.947037
FURNISS Jane	1960-08-23	GBRGBR	932.34	1966.07	0.94843
Zaituc Luminita	1968	LG Braunschweig	933.58	1955.9	0.95463
Dreher Claudia	1971	LG Olympia Dortmund	933.83	1961.9	0.951965
ELLIOTT Lucy	09 MAR 1966	GBRGBR	934.4	1992.08	0.938115
Wessinghage Ellen	1948	TuS Rot-Weiß Koblenz	934.76	1972.93	0.947586
TOOBY Susan	24 OCT 1960	GBRGBR	935.4	1940.95	0.963858
DAGNE Birhan	1978-04-08	GBRGBR	936.35	1950.04	0.960339
ASTIN Sarah	22 OCT 1993	GBRGBR	936.43	2009.39	0.932054
JONES Caryl	1987-04-04	GBRGBR	937.03	1972.53	0.950079
KIDGER Beth	16 MAR 1994	GBRGBR	937.47	1974.75	0.949457
WALDRON Sarah	1988-02-11	GBRGBR	937.49	1956.07	0.958544
KIRK Elinor	1989-04-26	GBRGBR	937.65	1937.05	0.968122
YELLING Liz	05 DEC 1974	GBRGBR	938.86	1918.39	0.9788
Möller Michaela	1973	LG Ratio Münster	939.12	1951.91	0.962257
KEARNEY Emily	1995-11-10	GBRGBR	939.65	1989.65	0.944538
DUCK Claire	1985-08-29	GBRGBR	939.68	1971.38	0.953322
TITTERINGTON Helen	24 OCT 1969	GBRGBR	940.14	1956.09	0.961244
Dieterich Eva	1999	Laufteam Kassel	940.16	1945.7	0.966398
YOUNG-WILKINSON Sarah	1970-01-02	GBRGBR	940.85	1954.07	0.962964
HULLEY Angela	1962-02-08	GBRGBR	941.11	1962.84	0.958927
STOCKTON Stevie	1989-08-23	GBRGBR	941.11	1955.26	0.962644
Bruns Ulrike	1953	ASK Vorwärts Potsdam	941.46	1879.76	1.00168
Michallek Vera	1958	LG Frankfurt	941.68	2048	0.919609
Harrer Corinna	1991	LG TF Regensburg	941.73	1947.75	0.966993
Kraus Melanie	1974	TSV Bayer 04 Leverkusen	941.89	1932.4	0.97484
SMALL Louise	27 MAR 1992	GBRGBR	941.94	1954.73	0.963755
GILL Vicky	1980-08-21	GBRGBR	942.4	1961.17	0.961059
DONNELLY Abbie	1996-09-02	GBRGBR	942.65	1930.16	0.976758
WILLIAMS Bella	05 OCT 1998	GBRGBR	943.23	1997.07	0.944614
Hahn Susanne	1978	SV Schlau.com Saar 05	943.41	2083.51	0.905597
THOMAS-SAMUELS Sonia	16 MAY 1979	GBRGBR	944.24	1959.36	0.963825
CLAYTON Emma	1988-07-16	GBRGBR	944.38	2008.33	0.940463
BOWDEN Philippa	29 MAR 1995	GBRGBR	944.54	1953.1	0.967221
BAKER Eleanor	11 DEC 1983	GBRGBR	944.98	1993.32	0.948147
TANK Poppy	05 DEC 1997	GBRGBR	945.07	1970.57	0.959184
DEADMAN Lauren	27 MAR 1984	GBRGBR	945.12	1985.55	0.951998
WRIGHT Alice	1994-11-03	GBRGBR	945.51	1916.52	0.986695
Restle Simret	1984	PSV Grün-Weiß Kassel	945.55	1986.84	0.951813
HAINING Hayley	06 MAR 1972	GBRGBR	946.05	1967.96	0.961452
STEEL Gemma	1985-11-12	GBRGBR	947.21	1954.81	0.969107
Mai Christina	1961	LG Olympia Dortmund	947.73	2017.85	0.939346
KRZYWICKI Tara	09 MAR 1974	GBRGBR	948.01	1984.55	0.95539
Gehring Anna	1996	ASV Köln	948.02	1940.37	0.977154
WALKER Hannah	1991-08-09	GBRGBR	948.69	1976.9	0.959775
Wolf Kathrin	1966	LAC Quelle Fürth/München	948.84	2118.62	0.895715
FAGAN Collette	1982-06-06	GBRGBR	949.51	1980.31	0.958951
ROBINSON Debbie	1968-01-31	GBRGBR	949.68	1999.67	0.949837
Schöneborn Deborah	1994	LG Nord Berlin	949.81	1982.87	0.958015
Hahner Lisa	1989	RUN2SKY.com	949.83	2018.49	0.941129
Hahner, Lisa	1989	RUN2SKY.com	949.83	2018.49	0.941129
Metzner Claudia	1966	LG Sauerland	950.29	1949.86	0.974726
Jamrozy Ute	1964	PSV Eutin	950.64	1994.83	0.953104
Jamrozy, Ute	1986	Polizei-SV Eutin	950.64	1994.83	0.953104
MACLENNAN Mhairi	26 MAR 1995	GBRGBR	951.78	1978.42	0.962162
GRAY Natalie	1988-02-17	GBRGBR	952.73	2000.31	0.952582
Heckel Emma	2002	LG TelisFinanz Regensburg	952.78	1985.02	0.95997
Mayer Domenika	1990	LG TELIS FINANZ Regensburg	952.95	1963.82	0.970506
Jerschabek Birgit	1969	Schweriner SC	953.06	1934.75	0.985202
DAMEN Louise	12 OCT 1982	GBRGBR	953.11	2008.61	0.949024
DIXON Alyson	1978-09-24	GBRGBR	953.46	1975.36	0.965353
Schöneborn Rabea	1994	LG Nord Berlin	953.88	1975.96	0.965485
PALMER Gillian	13 DEC 1980	GBRGBR	953.96	1989.7	0.958898
Tanner Natalie	1995	LG Eintracht Frankfurt	955.86	1956.15	0.977287
Hottenrott Laura	1992	GSV Eintracht Baunatal	955.87	2023.41	0.944811
Dörfel Blanka	2	SCC Berlin	956.74	2034.69	0.940428
Kleinmann Larissa	1978	VfL Waiblingen	958.12	2000.05	0.958096
Maisch Ulrike	1977	1.LAV Rostock	958.17	2024.78	0.946444
Borgschulze Claudia	1964	Eintracht Hamm	958.37	1991.96	0.962238
Ritter Celine	1998	TuS Köln rrh.	958.77	2022.9	0.947916
Herzberg Kerstin	1966	LBV Phönix Lübeck	959	1988.4	0.964595
Herzberg, Kerstin	1993	LBV Phönix Lübeck	959	1988.4	0.964595
Soethout Jana Janine	1989	LG TF Regensburg	960.51	1982.02	0.969223
Schmidt Astrid	1963	LAV Aschaffenburg	961.87	2002.3	0.960765
Hanle Leah	1997	TSV Holzelfingen	962.46	2023.95	0.951071
Pingpank Svenja	1996	Hannover Athletics	962.67	1988.72	0.96813
Tertsch Lisa	1998	ASC Darmstadt	963.15	2019.13	0.954025
Pohl Veronica	1985	TSV Bayer 04 Leverkusen	963.99	2039.02	0.945542
Kalinowski Tanja	1968	ASV Köln	964.4	1988.36	0.970046
Teegen, Isabell	1993	SC Rönnau 74	964.45	2062.73	0.93512
Bultmann Birte	1974	LG Braunschweig	964.7	2037.6	0.946898
Neuhaus Beatrix	1963	Marathon-Club Menden	965.21	2119.2	0.910919
Kröckert Christina	1989	TSV Bayer 04 Leverkusen	965.96	2047.43	0.943583
Hahner Anna	1989	RUN2SKY.com	967.33	2088.62	0.926286
Hahner, Anna	1989	RUN2SKY.com	967.33	2125.61	0.910167
Heim Thea	1992	LG Telis Finanz Regensburg	968.34	2028.73	0.954627
Oed Lisa	1999	SSC Hanau-Rodenbach	969.34	2010.88	0.964095
Karsch Jutta	1961	LG Olympia Dortmund	969.62	2015.05	0.962378
Ojstersek Svenja	1994	LG TelisFinanz Regensburg	972.15	2025.08	0.96011
Hofmann Elvira	1961	TV Bad Mergentheim	972.2	1991.3	0.976448
Amrhein Fabienne	1992	MTG Mannheim	972.39	2026.14	0.959845
Amrhein, Fabienne	1992	MTG Mannheim	972.39	2026.14	0.959845
Vetter Heidrun	1961	LG Pfullingen	972.65	2022.86	0.961658
Kunkel Sabine	1964	VfL Wolfsburg	972.7	2087.47	0.931942
Lutz Susanne	1987	LG TF Regensburg	972.84	2051.45	0.948441
Gomell Annika	1991	USC Bochum	973.74	2034.72	0.957124
Schulte Tatjana	1997	LC Paderborn	973.86	2055.15	0.947726
Pohlmann Antje	1968	LG Olympia Dortmund	973.98	2076.85	0.93794
Benfares Selma	1999	LC Rehlingen	974.29	2042.63	0.953956
Maak Petra	1964	LAV Bayer Uerdingen/Dorm.	974.54	2071.1	0.941084
Althaus Franziska	1998	TV Waldstraße Wiesbaden	976.51	2053.48	0.951078
Hutterer Heidi	1959	TG Landshut	976.8	2040	0.957647
Östringer Maren	1974	TSG 1885 Wiesloch	977.03	2022.62	0.966103
Östringer, Maren	1974	TSG Wiesloch	977.03	2022.62	0.966103
Vahlensieck Christa	1949	Barmer TV 1846 Wuppertal	978.24	2019.4	0.968842
Hanner Elisabeth	1966	Moerser TV	978.98	2033.04	0.96307
Kieninger, Renate	1954	LG Offenburg	979.1	2323.2	0.842889
Kaiser Céline	1998	LAC Freiburg	979.75	2041.18	0.959984
John Jannika	1992	LAC Quelle Fürth	979.8	2095.31	0.935232
Gerdes Christina	1995	Hamburger SV	979.85	2084.64	0.940066
Schuri Monika	1969	Laufgem.Wehringen	979.91	2070.23	0.946668
Stahl Jasmina	2002	Hannover 96	980.13	2051.12	0.955702
Bockel Karen	1975	VfL Waiblingen	980.98	2141.19	0.916294
Schedler Michaela	1982	Post-Sport Telekom Trier	981.04	2036.02	0.963684
Mann Sabine	1965	ASV Köln	981.44	2066.9	0.949673
Kümpers Julia	1992	Leichtathletikclub Kronshagen	981.56	2035.27	0.96455
Kümpers, Julia	1992	LAC Kronshagen	981.56	2035.27	0.96455
Hain Jeanette	1966	SC Dynamo Berlin	982.3	2035.67	0.965088
Riemann Sandra	1973	ESC Erfurt	982.34	2012.44	0.976268
Lorch Britta	1968	LG Bayer Leverkusen	982.47	2100.4	0.935508
Hilschenz Marina	1981	LG Wedel/Pinneberg	982.5	2089.62	0.940362
Staab Klothilde	1961	LAC Quelle Fürth	982.71	2110.88	0.93109
Stöwer Eva- Maria	1985	LAC Veltins Hochsauerland	982.91	2008.28	0.978858
Kukel Monika	1966	ASK Vorwärts Potsdam	983.1	2022.24	0.972288
Högl Regina	1993	LG Region Landshut	983.83	2109.15	0.932916
Kleine Linn Lara	2001	LG Olympia Dortmund	984.04	2059.42	0.955648
Grossert Doris	1961	LG Braunschweig	984.12	1996.8	0.985697
Aehling Carolin	1989	LG TF Regensburg	984.18	2044.35	0.962829
Griesche Cornelia	1993	DJK Ingolstadt	984.96	2098.97	0.938517
Tränkle Melina	1992	LG Region Karlsruhe	985.92	2069.7	0.952718
Viellehner Julia	1985	LG Passau	985.98	2097.37	0.940206
Abel Svenja	1983	TV Lahr	986.2	2077.45	0.949433
Abel, Svenja	1983	TV Lahr	986.2	2077.45	0.949433
Klein- Arndt Melanie	1975	ASC Rosellen Neuss	986.99	2142.99	0.921134
Weinhold Birgit	1964	SC Motor Jena	987	2021.5	0.976503
Liebertz Petra	1960	VfL Wolfsburg	987.08	2037.76	0.968789
Renz Sylvia	1969	LG Nike Berlin	987.34	2000	0.98734
Pautmeier Maria	1967	LV Oelde	987.4	2043.5	0.966381
Cronjäger Ines	1977	LG Seesen	987.7	2038.41	0.969089
Fischer Ingrid	1961	TuS Rot-Weiß Koblenz	987.79	2040.5	0.968184
Allmannstötter Gabriele	1960	VfL Waldkraiburg	987.81	2072.91	0.953066
Müller Isabelle	1971	SV Saar 05 Saarbrücken	987.93	2073.88	0.952736
Bechtloff Mareike	1990	ASV Erfurt	988.3	2093.06	0.944359
Fischer Katja	1991	LAV Stadtwerke Tübingen	989.18	2116.65	0.934666
Heuck Ingalena	1986	LG Stadtwerke München	989.96	2010.25	0.984912
Siewert Carmen	1972	LG Vorpommern	990.08	2083.39	0.950451
Engelen Katrin	1976	LG Bäderkreis	990.3	2077.65	0.953289
Starke Ursula	1956	LG Seesen	990.71	2023.66	0.979127
Streck Kerstin	1969	TV Trebur	991.3	2068.5	0.958472
Veith Manuela	1974	ABC Ludwigshafen	991.65	2066.74	0.959627
Jeck Saskia	1976	ABC Ludwigshafen	991.71	2117.7	0.936592
Schultz Eva	1995	LG Passau	992.18	2131.69	0.930886
Franzis Elisabeth	1962	SV 1919 Sonsbeck	992.28	2010.6	0.987049
Böker Stefanie	1957	Bielefelder TG	992.97	2117.78	0.937746
Petersen Birgit	1962	ASV Köln	993.1	2126.61	0.933975
Leukel Christiane	1968	LG Andernach/Neuwied	993.3	2101.84	0.945172
Götte Marion	1960	TV Wattenscheid 01	994.2	2048.64	0.970595
Hoffmeister Kerstin	1967	SC Cottbus	994.5	2079.2	0.956618
Stöcker Nina	1992	LG Ratio Münster	995.56	2107.38	0.944832
Zipse, Manuela	1974	LC Rothaus Breisgau	995.88	2239.11	0.889532
Heinze Judith	1981	TSV Bayer 04 Leverkusen	995.92	2097.97	0.949413
Dressel Daniela	1963	SSV Ulm 1846	996.77	2094.06	0.951998
Waeber Beate	1967	LLC Marathon Regensburg	997.43	2047.48	0.9743
Reng Franziska	1996	LG TF Regensburg	997.75	2063.93	0.966845
Bienstein Heike	1986	LG Olympia Dortmund	998.18	2083.53	0.958162
Lange Peggy	1973	LG Olympia Dortmund	998.2	2096.31	0.95234
Gatzweiler Ursula	1988	ASV Köln	998.91	2100.06	0.951316
Lennartz Birgit	1965	ASV Sankt Augustin	999	2070.78	0.964854
Kallenberg Friederike	1983	LAC Pliezhausen	999.42	2101.22	0.951276
Schmidt Friederike	1973	LG Dresdner SC 1898	999.6	2028.62	0.985498
Rappold Marina	1997	LG Telis Finanz Regensburg	1000.2	2128.57	0.939786
Mattern Carolin	1983	OSC Berlin	1000.44	2147.79	0.931599
Moser Tania	1990	Spiridon Frankfurt	1000.63	2072.58	0.965589
Klenk Carmen	1974	LG Karlstadt	1000.93	2093.66	0.956153
Grüner Olivia	1969	LT Radolfzell	1002.41	2067.32	0.969768
Grüner, Olivia	1969	LT Radolfzell	1002.41	2067.32	0.969768
Reefschläger Birgit	1960	LG Olympia Dortmund	1003.06	2113.6	0.949148
Michel Sylvia	1967	SC Turbine Erfurt	1003.2	2087.5	0.96115
Güldemeister Nicole	1982	SC Potsdam	1003.77	2056.71	0.976093
Lehmann Eva- Maria	1958	SCC Berlin	1003.8	2062.34	0.973457
Schulz Jenny	1983	Skills 04 Frankfurt	1004.05	2132.23	0.941784
Autenrieth Annika	1997	LG farbtex Nordschwarzwald	1004.26	2108.5	0.952582
Körner Felicia	1996	LG Sempt	1004.67	2067.6	0.971822
Gröber Hanna	1996	LAV Stadtwerke Tübingen	1004.86	2095.23	0.959188
Stemper Melanie	1991	TSV Bayer 04 Leverkusen	1004.86	2132.25	0.942535
Braun Jutta	1956	LG Frankfurt	1004.98	2144.5	0.937263
Heinig Katharina	1989	LG Eintracht Frankfurt	1005.55	2015.18	0.997975
Volke Steffi	1976	LG TF Regensburg	1005.61	2060.17	0.97624
Schlosser Doris	1944	OSC 1960 Höchst	1005.74	2115.1	0.951009
Morgenroth Carla	1995	LAC Olympia 88 Berlin	1006.31	2144.69	0.93842
Strate Stephanie	1991	SV Brackwede	1006.39	2139.39	0.94082
Byrd, Andreina	1978	MTG Mannheim	1006.62	2105.92	0.955991
Mockenhaupt Hildegard	1954	LG Sieg	1007.4	2090.72	0.963687
Maciossek- Krause Edith	1960	SCC Berlin	1007.49	2108.23	0.955769
Wehr Katharina	1996	ASV Duisburg	1008.67	2108.11	0.956942
Knudsen, Dagmar	1956	LAV Husum	1008.7	2086.8	0.966743
Schön Maike	1989	LAZ PUMA Rhein-Sieg	1008.74	2146.36	0.939954
Holtkamp Anna- Isabel	1955	ASV Köln	1008.85	2107.5	0.95739
Imkamp Alexandra	1953	ESV Münster	1009.07	2127.7	0.948508
Lehmann Martina	1967	TV Jahn Wolfsburg	1009.35	2102.01	0.960367
Hoffmann Elke	1964	TV Hatzenbühl	1009.52	2096.16	0.963209
Brod, Jutta	1973	TV Konstanz	1012.54	2137.43	0.947437
Friedrichsen(-Paysen), Karen	1973	TSV Langenhorn	1016.06	2106.49	0.964695
Schlosser, Doris	1944	LG Coop Kurpfalz	1023	2136.3	0.957731
Braun, Jutta	1956	TV 1893 Rheinau	1025.4	2144.5	0.956307
Wagner, Sabrina	1988	LG Offenburg	1026.17	2198.06	0.933705
Adler, Nicole	1992	LAC Kronshagen	1027.11	2180.79	0.941961
Jachmann, Natalie	1991	TSV Glücksburg 09	1027.26	2137.33	0.961255
Seith, Bettina	1964	LG Karlsruhe	1027.51	2202.3	0.933124
Wellbrock, Nele	2000	LAC Kronshagen	1027.89	2194.11	0.936954
Sietz, Karin	1966	LG Wedel/Pinneberg	1029.8	2131.5	0.966268
Hormann, Stefanie	1967	LBV Phönix Lübeck	1030.2	2152.2	0.957346
Wolf, Ursula	1963	TV 1893 Rheinau	1034.6	2147.6	0.963494
Ambrosy, Sonja	1970	LC Breisgau	1036	2156.9	0.960638
Schmitt, Brigitte	1946	VfL Mosbach-Elzach	1036.8	2153.3	0.962987
Röhrnbacher, Inge	1947	ESG Frankonia Karlsruhe	1037.8	2180	0.95211
Löffler, Sabine	1968	LG Hardt	1038.6	2210.94	0.93951
Adler, Christin	1992	LAC Kronshagen	1041.28	2226.97	0.935154
Schleifer, Christine	1983	LV Biet	1041.92	2161.6	0.964027
Huber, Gertrud	1954	TuS Neureut	1042.4	2200.8	0.947292
Zentner, Lidia	1953	Gazelle Pforzheim/Königsbach	1042.8	2195	0.950159
Steiger, Karin	1974	LC Breisgau	1044.15	2214.6	0.942969
Sülzle, Anja	1971	LC 80 Pforzheim	1044.69	2256.6	0.925897
Falkenberg, Anja	1969	LSG Karlsruhe	1046.12	2274.1	0.92003
Kaiser, Sophia	1996	LG Region Karlsruhe	1047.53	2205.92	0.949744
Hoeltz, Ulrike	1961	LSG Karlsruhe	1048.02	2173.27	0.964464
Echle, Verena	1984	TV Biberach	1052.31	2194.58	0.959008
Ehlers, Maria	1951	TSV Ratekau	1054.34	2213	0.95286
Lakies, Anke	1967	VfL Oldesloe	1060	2363.4	0.897013
Benz, Marion	1970	TB Emmendingen	1061.2	2247.08	0.944515
Grüner, Annemarie	1940	LT Radolfzell	1061.24	2201.04	0.964308
Richter, Christine	1964	Bramstedter TS	1063.6	2279.4	0.933228
Hüttner, Inge	1953	TV 1893 Rheinau	1064.9	2198.5	0.968751
Behrend, Birgit	1969	Kieler TB	1065.54	2185.2	0.975233
Imgraben, Monika	1959	LC Breisgau	1067.27	2269.14	0.940682
Jesberger, Heidi	1977	TSV Assamstadt	1068.3	2235.78	0.95564
Utz, Verena	1984	TV Biberach	1073.33	2204.89	0.973591
Carstensen, Anita	1960	LG RW Niebüll/TSV Süderlügum	1073.7	2243.4	0.957208
Ulrich, Uta	1966	LBV Phönix Lübeck	1074.8	2263.9	0.949512
Dieterich, Dr. Heike	1958	LC Marathon Rheinfelden	1076.08	2264.02	0.950592
Froehlich, Fenna	1997	LAC Lübeck	1076.89	2286.9	0.94179
Salomon, Gudrun	1941	LG Kiel	1078.9	2274	0.948901
Strothmann, Kristin	1964	LG Elmshorn	1086.5	2199.7	0.987862
Müller, Larissa	1992	MTG Mannheim	1089.59	2449.35	0.889697
Hauke, Charlotte	1939	LAC Neumünster	1089.63	2270.7	0.95973
Hettler, Ria	1952	DJK Mannheim	1091.1	2289.9	0.952967
Wagner, Constanze	1963	TV 1893 Rheinau	1091.7	2254.2	0.968592
Haas, Marilyne	1990	TV Biberach	1093.64	2422.9	0.902753
Stadel, Inge	1966	LAV Husum	1094.9	2322.8	0.942742
Schmider, Ursula	1970	TV Biberach	1095.9	2468	0.888088
Weber, Ingrid	1950	TSV Glücksburg 09	1098	2316.9	0.947818
Müller, Urte	1967	LAV Husum	1098.5	2427.8	0.904935
Humfeldt, Barbara	1969	LG MTV/Gut Heil Itzehoe	1099.1	2368.7	0.92802
Becker, Verena	1977	SG TSV Kronshagen/Kieler TB	1099.57	2348.35	0.936462
Zink, Birgit	1957	Gazelle Pforzheim/Königsbach	1102.23	2282.35	0.965873
Hirsch, Carmen	1956	LAV Husum	1113.5	2319.8	0.959997
Gudd, Bianca	1967	LBV Phönix Lübeck	1123.8	2328.5	0.965257
Tidow, Katja	1963	ETSV Gut Heil Neumünster	1123.9	2347.2	0.957652
Wentzel, Heidrun	1943	TSV Ratekau	1128.6	2416.1	0.934233
Konjack, Ingeborg	1944	LG Elmshorn	1131.9	2396.2	0.944746
Lindig, Gunda	1960	Ahrensburger TSV	1133.3	2371.2	0.955887
Steffen, Ingeborg	1943	TSV Neustadt	1138.5	2391.2	0.952242
Hoppe, Ursel	1963	TuS Holtenau	1146.02	2261.2	1.01364
Stumpf, Bettina	1958	Schenefelder TS	1150.8	2440.2	0.943201
Leibrandt, Claudia	1958	TSV Malente	1151.8	2340.1	0.984402
Krüger, Dagmar	1946	LG Kiel	1154.4	2461	0.938155
Seifert, Birgit	1956	LG Elmshorn	1155.54	2389.2	0.967303
Peters, Gesine	1971	LBV Phönix Lübeck	1156.53	2438.23	0.948664
Simon, Hilke	1967	LG Rönnau/Quellenhaupt	1157.9	2456.2	0.942839
Schubert, Ariane	1958	TuS Gaarden	1159	2436.4	0.951404
Hansen, Hannegret	1956	TSV Glücksburg 09	1161	2462.5	0.942944
Nienhaus, Carina	1986	Running Athlete Lübeck	1162.5	2395	0.970772
Sticher, Claudia	1986	LG Elmshorn	1189.79	2458.29	0.967982
Kreutzberger, Karin	1944	LG Elmshorn	1193.4	2454.2	0.972537

## Sheet: all KsA values
100m/200m	200m/400m	400m/800m	800m/1500m	1500m/3000m	3000m/5000m	5000m/10,000
0.98313	0.867192	0.847281	0.888096	0.909979	0.90841	0.972551
0.979099	0.869565	0.848797	0.892876	0.917912	0.973514	0.954975
0.972923	0.87195	0.861787	0.927055	0.936487	0.961241	0.963186
0.96246	0.880633	0.837783	0.911359	0.954187	0.976029	0.970258
0.993007	0.912185	0.837783	0.890865	0.93061	0.96157	0.948066
0.985199	0.876336	0.867005	0.894332	0.925033	0.984838	0.9491
0.976299	0.875101	0.868621	0.837984	0.897841	0.972153	0.977113
0.971014	0.89909	0.842435	0.893049	0.922646	0.955699	0.929311
0.964061	0.885006	0.842435	0.908199	0.900456	0.976705	0.948465
0.992606	0.893303	0.849028	0.916751	0.92635	0.958943	0.952922
0.977717	0.881759	0.846997	0.893616	0.907165	0.967827	0.943108
0.985799	0.876729	0.842855	0.878238	0.918653	0.948976	0.971346
0.98988	0.877375	0.863336	0.916268	0.908349	0.963054	0.954295
0.965054	0.915607	0.851333	0.918762	0.916327	0.981754	0.944319
0.984911	0.867232	0.822547	0.897079	0.898513	0.907466	0.949327
0.969424	0.911503	0.884592	0.897883	0.910764	0.953226	0.939601
0.990354	0.896636	0.860046	0.915905	0.915733	0.973881	0.953043
0.967684	0.872454	0.866894	0.922731	0.928253	0.959806	0.931144
0.978221	0.907187	0.876389	0.91422	0.932789	0.964854	0.954589
0.980463	0.894194	0.898528	0.945717	0.926755	0.99296	0.964595
0.991272	0.895619	0.836973	0.91422	0.923828	0.966858	0.965093
0.979129	0.879112	0.871834	0.933012	0.894344	0.985895	0.963673
0.99448	0.86225	0.865359	0.900083	0.915473	0.986826	0.955977
0.999538	0.862974	0.862798	0.901898	0.937218	0.987985	0.946439
0.986764	0.901197	0.828578	0.896141	0.945196	0.956686	0.953169
0.972584	0.905092	0.861288	0.91029	0.930776	0.958349	0.941765
0.963491	0.889067	0.889235	0.904811	0.946912	0.969378	0.955709
0.983636	0.915073	0.850413	0.911029	0.93425	0.976962	0.94127
0.976094	0.893574	0.883266	0.906471	0.931041	0.96786	0.95389
0.996317	0.883906	0.872146	0.933342	0.927258	0.963458	0.953872
0.989945	0.903815	0.895248	0.904318	0.916606	0.967954	0.944034
0.997697	0.901477	0.891999	0.94425	0.956536	0.977879	0.972137
0.995862	0.876696	0.86439	0.92456	0.931794	0.932781	0.940097
0.962239	0.867925	0.852451	0.918448	0.881387	0.982818	0.959904
0.9713	0.90813	0.893249	0.892868	0.926062	0.971469	0.966206
0.970891	0.895929	0.894187	0.91627	0.878006	0.934157	0.949466
0.985915	0.902262	0.898837	0.908157	0.916834	0.964171	0.937746
0.985915	0.896151	0.863542	0.933352	0.909636	0.975771	0.954881
0.99908	0.913026	0.850082	0.914912	0.927697	0.946428	0.972159
0.972247	0.879497	0.878345	0.914912	0.92356	0.984779	0.942993
0.99908	0.894842	0.83573	0.931374	0.93089	0.9546	0.96161
0.96408	0.901148	0.875398	0.92346	0.904984	0.954936	0.967536
0.983265	0.885986	0.883894	0.916194	0.845063	0.951145	0.960157
0.992701	0.901329	0.865249	0.920727	0.833927	0.945846	0.933475
0.977099	0.899197	0.851496	0.910579	0.906023	0.977946	0.967426
0.987755	0.873415	0.876318	0.905743	0.942263	0.969306	0.959121
0.992255	0.90385	0.83952	0.930085	0.943983	0.956973	0.96965
1.00415	0.92977	0.881248	0.916217	0.911746	0.941043	0.973006
0.968861	0.908539	0.893242	0.916217	0.952277	0.970864	0.980825
0.974061	0.899259	0.862735	0.903927	0.936876	0.959592	0.947225
0.980657	0.894286	0.827104	0.914562	0.955546	0.968831	0.949665
0.99136	0.901827	0.851445	0.915328	0.916098	0.997768	0.956489
0.974084	0.898939	0.868363	0.922192	0.936564	0.947604	0.971709
0.984199	0.859384	0.840554	0.917782	0.934821	0.955725	0.974336
1.00138	0.924882	0.836966	0.922627	0.918478	0.966963	0.941586
0.974084	0.893617	0.858582	0.932977	0.935019	0.957092	0.943905
1.00507	0.894726	0.88619	0.877004	0.948633	0.950029	0.953696
0.966342	0.887005	0.888982	0.953305	0.951675	0.964423	0.944419
0.983326	0.898024	0.867854	0.899969	0.932682	0.945593	0.944375
0.977599	0.912409	0.891144	0.897778	0.896802	0.958051	0.960374
0.975435	0.884306	0.890117	0.924419	0.928585	0.948752	0.933587
0.972829	0.887793	0.833843	0.892951	0.955285	0.971077	0.9663
0.971098	0.935189	0.871681	0.963075	0.900998	0.98208	0.987602
0.997716	0.90102	0.847066	0.919424	0.929545	0.969389	0.973588
0.986005	0.904093	0.886686	0.919886	0.919179	0.961209	0.953463
0.953296	0.894225	0.898945	0.935198	0.935444	0.980561	0.954469
0.987799	0.894935	0.86696	0.913887	0.886991	0.968358	0.958156
0.995446	0.888101	0.897825	0.906541	0.929161	0.970383	0.968712
0.983356	0.895511	0.854237	0.909341	0.924987	0.963368	0.979689
0.970288	0.899302	0.902839	0.922247	0.90595	0.953811	0.920245
0.988257	0.90708	0.889481	0.917578	0.949505	0.942464	0.954435
0.972444	0.897018	0.878225	0.852555	0.913417	0.938509	0.941214
0.966034	0.85406	0.895835	0.921721	0.943183	0.965169	0.953069
1.00229	0.900818	0.866225	0.925505	0.92271	0.986762	0.973012
0.975936	0.905698	0.893333	0.91905	0.904321	0.965255	0.943919
0.97899	0.881985	0.87686	0.918596	0.94149	0.93121	0.91557
0.983827	0.886141	0.881348	0.921157	0.948841	0.998726	0.971123
0.98427	0.901577	0.889884	0.932761	0.913753	0.956075	0.947568
0.995002	0.903781	0.883514	0.896584	0.927324	0.969731	0.944193
0.982519	0.890157	0.8714	0.933627	0.934827	0.974526	0.962624
0.988278	0.886493	0.909122	0.901294	0.928939	0.947339	0.946646
0.996817	0.917241	0.886141	0.929865	0.943486	0.969857	0.965307
0.970341	0.917241	0.884536	0.904243	0.925206	0.925286	0.967178
0.987832	0.890112	0.857211	0.912104	0.92943	0.983096	0.971788
0.974655	0.876378	0.814927	0.859499	0.940107	0.975666	0.985198
0.975957	0.878635	0.898082	0.897812	0.908	0.984016	0.95327
0.976392	0.916515	0.898249	0.927692	0.950087	0.982451	0.912672
0.982095	0.916145	0.839825	0.914129	0.910905	0.92568	0.945632
0.985182	0.923641	0.883553	0.907552	0.945086	0.959951	0.960347
1.00735	0.883866	0.870148	0.924534	0.933333	0.976234	0.941682
0.979464	0.843907	0.875649	0.918914	0.943912	0.964097	0.969938
0.977718	0.893659	0.868781	0.872324	0.943131	0.93407	0.959984
0.99411	0.865865	0.824235	0.881849	0.936442	0.956339	0.960579
0.99321	0.898121	0.842724	0.921211	0.906698	0.965766	0.966001
0.979902	0.89133	0.826545	0.927134	0.902776	0.976637	0.965542
0.98255	0.882205	0.837088	0.914467	0.947703	0.984544	0.925453
0.977738	0.897532	0.877356	0.925012	0.907408	0.961964	0.947922
0.977303	0.906481	0.827108	0.946321	0.920661	0.960612	0.978718
0.979046	0.884698	0.867954	0.937777	0.962845	0.983913	0.972668
0.97992	0.912738	0.892412	0.932976	0.936264	0.993439	0.946266
1.01012	0.917927	0.866353	0.921267	0.951964	0.972299	0.946551
1.00779	0.90533	0.835676	0.885576	0.931555	0.958992	0.95948
0.990983	0.911164	0.895039	0.935725	0.933385	0.959849	0.967062
0.982566	0.908149	0.898506	0.928499	0.933385	0.969433	0.961672
0.984326	0.876538	0.846136	0.907957	0.914643	0.970728	0.96982
0.977323	0.876538	0.879397	0.926258	0.951381	0.941729	0.949494
0.989199	0.889756	0.901097	0.87445	0.924078	0.971641	0.958489
0.972161	0.900652	0.83572	0.928037	0.921062	0.976969	0.954187
0.986105	0.887505	0.871682	0.928037	0.937819	0.956006	0.952039
0.999546	0.895915	0.831415	0.91831	0.937819	0.969671	0.952812
0.995926	0.921058	0.892554	0.931262	0.943476	0.968861	0.945299
1.01852	0.907897	0.840051	0.942582	0.915396	0.985288	0.953593
0.960314	0.90162	0.895108	0.939161	0.925401	0.977085	0.953563
0.983475	0.884325	0.835189	0.946026	0.918957	0.914148	0.955559
0.979537	0.903405	0.868781	0.903598	0.934091	0.985808	0.963747
1.0041	0.927295	0.890246	0.936593	0.910111	0.971012	0.970141
0.991445	0.924914	0.870279	0.915757	0.945841	0.975285	1.00675
0.963676	0.894366	0.875467	0.915985	0.935425	0.935229	0.954161
0.957391	0.92401	0.86617	0.930529	0.943862	0.980391	0.970631
0.987898	0.891228	0.847679	0.917579	0.925074	0.967016	0.997247
0.980863	0.909706	0.844837	0.911992	0.959347	0.959637	0.946261
0.989672	0.922549	0.896749	0.924668	0.9266	0.956581	0.964699
0.978686	0.891792	0.8209	0.93817	0.930295	0.959637	0.958512
0.98349	0.922549	0.846004	0.934319	0.929874	0.998163	0.95071
0.98349	0.925566	0.849134	0.918809	0.945898	0.98915	0.981749
0.988784	0.881186	0.869799	0.925557	0.906149	0.969156	0.966538
0.979991	0.870955	0.868326	0.91015	0.941856	0.972308	0.968735
0.979556	0.890185	0.880435	0.920632	0.927399	0.973673	0.957192
0.980863	0.903353	0.832746	0.930695	0.910673	0.980469	0.933117
0.969244	0.88661	0.902425	0.903492	0.90979	0.981648	0.953748
0.997739	0.88661	0.870552	0.931435	0.931091	0.934262	0.982103
0.980009	0.92008	0.862963	0.912061	0.924114	0.972773	0.983865
0.987466	0.905787	0.875587	0.927874	0.954121	0.935283	0.952736
0.979139	0.89522	0.860884	0.912516	0.928473	0.972696	0.955412
0.981753	0.904433	0.851216	0.923277	0.921479	0.95179	0.950005
0.976991	0.874619	0.89491	0.930704	0.911033	0.960155	0.964898
0.994595	0.914923	0.910378	0.911792	0.929421	0.989198	0.968675
0.973545	0.890268	0.881293	0.944632	0.937734	0.959643	0.956018
0.984396	0.908228	0.894145	0.928195	0.926487	0.989096	0.956578
0.983519	0.904509	0.849157	0.922146	0.877307	0.97745	0.96463
0.988804	0.879066	0.878959	0.872079	0.925862	0.979242	0.984191
0.991023	0.911001	0.832706	0.87866	0.935575	0.992894	0.953762
0.964192	0.872369	0.851403	0.908401	0.927293	0.941823	0.943181
0.970549	0.900274	0.848271	0.945067	0.942539	0.968129	0.960218
0.976991	0.902114	0.846097	0.913414	0.923372	0.976486	0.989148
0.988372	0.925889	0.870147	0.925934	0.946774	0.962633	0.97584
0.993258	0.857833	0.853097	0.926472	0.927435	0.978069	0.954942
0.978309	0.906201	0.900761	0.865697	0.91288	0.973105	0.957124
0.978742	0.895002	0.913054	0.910265	0.93812	0.978298	0.935789
0.978742	0.896779	0.880376	0.930986	0.938018	0.948912	0.957416
0.987048	0.912717	0.845907	0.910461	0.916312	0.966958	0.977368
0.97961	0.918586	0.882959	0.915946	0.948032	0.980367	0.957397
0.985288	0.887951	0.849854	0.923845	0.913213	0.939752	0.943818
0.974427	0.909591	0.907255	0.901707	0.922163	0.965793	0.959412
0.946872	0.930653	0.927608	0.913558	0.915023	0.980931	0.964478
0.97188	0.911452	0.870939	0.921907	0.884606	0.962907	0.964478
0.984862	0.861178	0.907341	0.930991	0.930255	0.975825	0.952252
0.988382	0.876464	0.89243	0.939427	0.946994	1.00086	0.973824
0.979628	0.889272	0.864697	0.912257	0.925892	0.967209	0.966701
0.98574	0.885921	0.909006	0.928407	0.918575	0.950956	0.962347
0.998195	0.878593	0.918246	0.913193	0.934595	0.941507	0.986753
1.00272	0.909304	0.901486	0.923779	0.944339	0.986055	0.968795
0.983548	0.921584	0.858223	0.919798	0.876336	0.978438	0.94366
0.988382	0.885464		0.918631	0.926007	0.951175	0.985347
0.997295	0.906542		0.914882	0.912469	0.976023	0.960277
0.989276	0.891954		0.920607	0.921018	0.981009	0.962919
0.983563	0.898881		0.938991	0.937071	0.971426	0.966012
0.985752	0.874085		0.927539	0.914366	0.958889	0.967975
0.990604	0.909623		0.890578	0.891003	0.971166	0.961859
1.00728	0.897016		0.887475	0.927684	0.964778	0.957188
0.98008	0.903138		0.921383	0.921055	0.959604	0.964763
0.991935	0.878628		0.907322	0.918388	0.986882	0.955372
0.996403	0.920134		0.927591	0.916571	0.985517	0.972177
0.986643	0.912466		0.926713	0.944657	0.981656	0.926225
0.981399	0.912144		0.900607	0.962421	0.975212	0.948387
1.02026	0.895059		0.894527	0.923399	0.948757	0.967214
0.99017	0.878076		0.935005	0.925922	0.966414	0.963115
0.989728	0.894203		0.868348	0.960837	1.01459	0.964868
0.995508	0.883554		0.92001	0.857663	0.991046	0.935747
0.989295	0.91471		0.937891	0.94656	0.998522	0.938954
1.00956	0.906202		0.902079	0.942352	0.972625	0.97781
0.986655	0.929068		0.911512	0.943532	0.981583	0.949215
0.987094	0.89634		0.940553	0.921468	0.97085	0.94592
0.979682	0.916716		0.896074	0.97718	0.953305	0.961875
0.984916	0.940893		0.887602	0.94436	0.979484	0.961932
1.00452	0.891681		0.893346	0.888214	0.967023	0.967196
0.992401	0.8875		0.923608	0.930943	0.966251	0.956266
0.986228	0.868743		0.91028	0.927293	0.970616	0.936
0.987984	0.911141		0.901918	0.864057	0.957857	0.954726
0.980565	0.902369		0.941524	0.94348	0.956863	0.953369
0.946695	0.890239		0.91503	0.939177	0.976855	0.945752
0.981015	0.874138		0.884777	0.857616	0.973667	0.974847
0.969459	0.907823		0.938899	0.894452	0.954833	0.93901
0.954058	0.915301		0.912877	0.964282	0.981664	0.960046
0.998653	0.907017		0.938665	0.896032	0.969352	0.970795
0.981032	0.909866		0.896343	0.889945	0.998248	0.954349
0.980167	0.92347		0.945081	0.923068	0.987549	0.926267
0.982332	0.901825		0.899078	0.947277	0.963187	0.974654
0.976295	0.903213		0.921547	0.869229	0.960589	0.948925
0.984071	0.91433		0.907212	0.879295	0.960589	0.946473
0.991537	0.901381		0.922388	0.922142	0.974286	0.946473
1.0009	0.879985		0.907981	0.920307	0.987218	0.953671
0.991095	0.913508		0.877218	0.933977	0.98236	0.966477
0.988016	0.889856		0.894367	0.932884	0.967904	0.938278
0.990654	0.896644		0.894662	0.911762	0.967017	0.953228
0.970357	0.894767		0.914818	0.897438	0.971465	0.971313
1.00225	0.913221		0.932242	0.932362	0.922198	0.95392
0.972477	0.891457		0.894084	0.906077	0.987171	0.952885
1.00406	0.89604		0.887916	0.920257	0.987025	0.9626
0.985841	0.903994		0.923667	0.868014	0.971864	0.941859
0.97848	0.898473		0.939896	0.912431	0.975404	0.968917
0.964085	0.877631		0.918878	0.944989	0.939802	0.974345
0.982812	0.913069		0.920884	0.928078	0.953308	0.957959
0.988475	0.906436		0.892958	0.91095	0.961822	0.956612
0.988475	0.896617		0.906225	0.943637	0.946873	0.942427
0.978499	0.903176		0.945302	0.897317	0.958639	0.942782
0.982379	0.905776		0.906245	0.895439	0.962032	0.964464
0.984547	0.914374		0.928731	0.913463	0.971704	0.973558
0.981514	0.921546		0.911246	0.912418	0.973265	0.948454
0.975524	0.911793		0.888772	0.922305	0.981261	0.958147
0.979807	0.899467		0.893053	0.932014	0.966021	0.945301
0.980237	0.924311		0.9375	0.914085	0.953104	0.953069
0.990679	0.931075		0.951752	0.902321	0.939732	0.966505
0.978089	0.908707		0.88552	0.917179	0.955306	0.953605
0.984996	0.905646		0.926295	0.898516	0.965759	0.964082
0.96833	0.88818		0.940971	0.904778	0.978656	0.955336
0.921552	0.922627		0.885028	0.914166	0.956704	0.945269
1.00224	0.920894		0.88909	0.905579	0.952487	0.973185
0.992889	0.919464		0.899732	0.861638	0.967279	0.944902
0.989371	0.906136		0.930755	0.934779	0.972616	0.954558
0.994657	0.892655		0.893683	0.891471	0.966172	0.999279
0.985009	0.881577		0.908969	0.875013	0.957678	0.957191
0.979395	0.874585		0.91031	0.910569	0.964702	0.944301
0.965011	0.905516		0.913594	0.880451	0.974757	0.981725
0.985009	0.892273		0.93353	0.921729	0.965882	0.980805
0.965011	0.896825		0.886746	0.956876	0.96913	0.978068
0.988943	0.896825		0.910702	0.888697	0.977364	0.961418
0.987633	0.880564		0.897023	0.933942	0.952693	0.966267
1.0009	0.90836		0.906702	0.894551	0.962875	0.962613
0.997324	0.884995		0.919415	0.927303	0.933827	0.962766
0.982425	0.886152		0.908722	0.925378	0.873848	0.965501
0.964625	0.879585		0.947627	0.891201	0.969171	0.931868
0.979431	0.904762		0.922899	0.933729	0.967264	0.960083
0.974314	0.931818		0.935289	0.92744	0.955496	0.955275
0.995995	0.903495		0.910778	0.942335	0.973436	0.962071
0.977293	0.88997		0.903034	0.919835	0.9752	0.95878
0.982872	0.908015		0.910761	0.922598	0.957829	0.946644
0.979431	0.881928		0.905353	0.949165	0.960193	0.962176
0.999553	0.903912		0.902166	0.915058	0.982571	0.961829
1.00089	0.907185		0.912755	0.9038	0.97607	1.00093
0.96134	0.884758		0.892781	0.914254	0.963613	0.941889
0.982872	0.936848		0.889339	0.893801	0.951178	0.944801
0.95234	0.917629		0.943295	0.941058	0.964061	0.936853
1.00045	0.9141		0.894957	0.95209	0.971937	0.961534
0.992028	0.962336		0.903703	0.963541	0.963145	0.958345
0.977312	0.917706		0.932421	0.901177	0.959176	0.96098
0.982456	0.908297		0.873207	0.93975	0.96367	0.951246
0.979449	0.913359		0.945103	0.90726	0.972522	0.985007
0.97646	0.860065		0.904853	0.92615	0.953946	0.956255
0.980736	0.905247		0.905822	0.94256	0.952484	0.963196
0.988526	0.880529		0.900943	0.922278	0.969317	0.946771
0.982456	0.911681		0.938338	0.902696	0.9575	0.986478
0.955631	0.912928		0.912667	0.907643	0.95976	0.957724
0.954817	0.920805		0.91662	0.958659	0.979141	0.970539
0.9881	0.885041		0.85817	0.937725	0.972892	0.977528
0.985062	0.937573		0.92267	0.951674	0.975868	0.948395
0.978612	0.84887		0.93341	0.899432	1.00356	0.963175
0.9881	0.908439		0.905963	0.934662	0.962387	0.951776
0.981182	0.913613		0.839395	0.901322	0.959395	0.951776
0.980324	0.910846		0.920037	0.92878	0.958862	0.986018
0.979467	0.915415		0.910128	0.887771	0.966262	0.985668
0.976481	0.864419		0.917423	0.892765	0.977986	0.972315
0.964301	0.92346		0.94093	0.850029	0.967562	0.980115
0.938075	0.918775		0.894358	0.904236	0.962254	0.925378
0.991166	0.922197		0.942539	0.925545	0.965071	0.948439
0.987676	0.839896		0.925286	0.92116	0.995671	0.990322
0.992042	0.935496		0.960675	0.937044	0.953188	0.98775
0.98594	0.939694		0.902445	0.927314	0.962651	0.9601
0.983793	0.871113		0.885311	0.928698	0.973553	0.967814
0.998222	0.847997		0.940124	0.913237	0.97752	0.948164
1.00627	0.912202		0.865751	0.940718	0.957779	0.95481
0.988121	0.937066		0.92682	0.908818	0.959511	0.963586
0.992927	0.867143		0.894024	0.962242	0.958577	0.961163
0.986386	0.863798		0.926604	0.939982	0.959624	0.974746
0.989001	0.890436		0.91215	0.895682	0.984896	0.975288
0.979948	0.904328		0.895092	0.93374	0.968583	0.954574
0.985533	0.893375		0.948261	0.915692	0.98945	0.961639
0.982088	0.919909		0.933957	0.945563	0.962867	0.959309
0.983807	0.852993		0.940079	0.916146	0.989627	0.972583
0.992933	0.894756		0.904644	0.944919	0.964644	0.972435
0.959044	0.857745		0.909598	0.908841	0.968702	0.973609
0.989001	0.920444		0.927445	0.931503	0.979161	0.960669
0.961094	0.9099		0.927445	0.931813	0.979992	0.967158
0.986409	0.899395		0.891307	0.91629	0.972333	0.953001
0.990753	0.866678		0.899484	0.916244	0.972982	0.968825
0.990761	0.919963		0.918589	0.978138	0.95282	0.979065
0.982548	0.898572		0.900975	0.935014	0.973766	0.975415
0.980836	0.905709		0.920783	0.92572	0.974783	0.94971
0.982135	0.882986		0.906858	0.918971	0.991259	0.954915
0.982992	0.890416		0.896752	0.903614	0.975449	0.965266
0.989464	0.914902		0.93701	0.925559	0.961995	0.972641
0.98385	0.868876		0.947129	0.944256	0.990052	0.956557
0.967382	0.854864		0.935583	0.907561	0.969641	0.96187
0.967382	0.91364		0.92671	0.947265	0.975229	0.980182
0.971133	0.902801		0.924107	0.951309	0.962655	0.947701
0.986014	0.919181		0.919863	0.917887	0.974873	0.961249
0.989908	0.892496		0.93141	0.926133	0.982809	0.955927
1.01667	0.881996		0.905892	0.910462	0.947671	0.95064
0.989474	0.871479		0.905892	0.914184	0.965541	0.947037
0.971995	0.900691		0.903132	0.954495	0.970675	0.94843
0.962868	0.896714		0.944315	0.952633	0.972044	0.95463
0.986888	0.921707		0.907622	0.931537	0.959675	0.951965
0.983449	0.898698		0.872565	0.931649	0.955028	0.938115
0.983021	0.858921		0.910593	0.897255	0.927995	0.947586
0.976221	0.882029		0.896414	0.932109	0.957055	0.963858
0.997792	0.869474		0.902082	0.936799	0.961751	0.960339
0.983892	0.879703		0.899839	0.926443	0.971306	0.932054
0.998233	0.890597		0.931236	0.911094	0.954697	0.950079
0.994281	0.892071		0.899039	0.919997	0.957113	0.949457
1.00044	0.880324		0.92295	0.931149	0.93636	0.958544
0.987762	0.905244		0.897908	0.938003	0.93636	0.968122
0.983464	0.862853		0.904923	0.948429	0.975216	0.9788
1.00534	0.856508		0.914777	0.913331	0.964655	0.962257
0.996473	0.889874		0.914563	0.924473	0.922758	0.944538
0.990359	0.855247		0.919928	0.903404	0.952262	0.953322
1.01119	0.879021		0.899026	0.900921	0.983447	0.961244
0.969125	0.92038		0.907773	0.917133	0.968077	0.966398
0.988194	0.891796		0.936005	0.90297	0.982623	0.962964
0.956007	0.872752		0.907473	0.927587	0.98079	0.958927
0.982609	0.870195		0.957193	0.917352	0.957357	0.962644
0.931959	0.859619		0.909012	0.936792	0.957504	1.00168
0.945257	0.896368		0.880618	0.920633	0.933128	0.919609
0.949622	0.885859		0.924204	0.935771	0.970778	0.966993
1.00892	0.883446		0.935673	0.931522	0.977145	0.97484
0.985621	0.909706		0.912736	0.941654	0.970397	0.963755
0.971232	0.87706		0.911357	0.921598	0.969918	0.961059
0.986063	0.906638		0.918487	0.915777	0.958933	0.976758
0.990376	0.908929		0.915647	0.936818	0.95306	0.944614
0.99081	0.896286		0.933046	0.974809	0.973819	0.905597
0.950861	0.895731		0.901856	0.952429	0.964146	0.963825
0.969178	0.897445		0.900513	0.951673	0.990702	0.940463
0.960543	0.892913		0.922517	0.95122	0.957387	0.967221
0.97295	0.931472		0.88286	0.93822	0.95314	0.948147
1.00088	0.883961		0.912193	0.927049	0.941919	0.959184
0.951301	0.880903		0.911947	0.909027	0.925634	0.951998
0.960577	0.938218		0.912193	0.941619	0.916576	0.986695
0.978411			0.908237	0.925596	0.962385	0.951813
0.978411			0.932655	0.923622	0.958142	0.961452
0.958545			0.932655	0.898177	0.926101	0.969107
0.989952			0.903123	0.93415	0.971213	0.939346
0.98952			0.933835	0.957555	0.95357	0.95539
0.964255			0.927681	0.930427	1.00818	0.977154
0.973809			0.871503	0.966217	0.975963	0.959775
0.947368			0.913117	0.90868	0.977667	0.895715
0.996485			0.920472	0.914016	0.964937	0.958951
0.959797			0.931958	0.900558	0.975262	0.949837
1.00621			0.886316	0.971977	0.938421	0.958015
0.967164			0.924998	0.957078	0.982612	0.941129
0.959391			0.898772	0.957078	0.956845	0.941129
0.997361			0.864445	0.904267	0.961	0.974726
0.990393			0.896135	0.917219	0.930351	0.953104
0.967164			0.875941	0.930344	0.961484	0.953104
0.946622			0.862714	0.909502	0.967736	0.962162
0.993435			0.89472	0.92742	0.913203	0.952582
0.964726			0.884339	0.92742	0.965719	0.95997
0.974249			0.932854	0.916289	0.946489	0.970506
0.964316			0.943873	0.922364	0.997774	0.985202
0.983536			0.846879	0.931858	0.988014	0.949024
0.957841			0.946965	0.931205	0.97184	0.965353
0.950628			0.868162	0.919142	0.952794	0.965485
0.949039			0.946784	0.910503	0.989445	0.958898
0.956266			0.889775	0.92974	0.931792	0.977287
0.97515			0.925531	0.937505	0.972121	0.944811
0.994755			0.913805	0.96097	0.987022	0.940428
1.01111			0.912824	0.920878	0.970638	0.958096
0.996065			0.907211	0.923294	0.943505	0.946444
0.981897			0.88947	0.928791	0.973796	0.962238
0.947982			0.943101	0.929677	0.978208	0.947916
0.966073			0.893042	0.927095	0.96813	0.964595
0.965663			0.892269	0.926785	0.973834	0.964595
0.977263			0.915552	0.932594	0.977744	0.969223
0.959158			0.903551	0.922335	0.988488	0.960765
0.961993			0.879625	0.904245	0.95524	0.951071
0.981474			0.897492	0.918451	0.995488	0.96813
0.981474			0.857345	0.922885	0.920185	0.954025
0.994331			0.882628	0.908296	0.967979	0.945542
0.973549			0.918834	0.872568	0.967979	0.970046
0.980241			0.898721	0.930402	0.91783	0.93512
0.976884			0.923893	0.950938	0.965222	0.946898
0.991743			0.946941	0.939395	0.982065	0.910919
0.985745			0.947222	0.908676	0.955294	0.943583
0.97774			0.898162	0.925799	0.980226	0.926286
0.9525			0.908584	0.919027	0.973654	0.910167
0.980695			0.919105	0.964423	0.967225	0.954627
0.974425			0.938206	0.938724	0.9762	0.964095
1.00307			0.843116	0.939935	0.93302	0.962378
0.95052			0.942498	0.919657	0.976207	0.96011
0.967005			0.897599	0.908153	0.984671	0.976448
0.987473			0.923299	0.886351	0.921401	0.959845
0.990468			0.922493	0.923483	0.989703	0.959845
1.00307			0.909638	0.937886	0.942862	0.961658
0.98961			0.912254	0.915245	0.978542	0.931942
0.971526			0.905415	0.947728	0.957046	0.948441
0.963744			0.893448	0.93966	0.979426	0.957124
0.983649			0.898982	0.932137	0.945405	0.947726
1.00307			0.944463	0.920757	0.978853	0.93794
0.992194			0.915824	0.91426	0.974503	0.953956
0.971138			0.877503	0.910373	0.978226	0.941084
0.969081			0.887561	0.917642	0.934537	0.951078
1.00439			0.865879	0.925218	0.934537	0.957647
0.984933			0.915098	0.931169	0.982847	0.966103
1			0.911112	0.93353	0.944905	0.966103
0.990476			0.912948	0.937597	0.974332	0.968842
0.967851			0.846189	0.911638	0.945465	0.96307
0.971138			0.88372	0.927583	0.997788	0.842889
0.990905			0.932925	0.934192	0.939655	0.959984
0.954526			0.911536	0.942521	0.960903	0.935232
0.989628			0.882712	0.92452	0.968476	0.940066
0.964617			0.931619	0.928487	0.977565	0.946668
0.96543			0.86476	0.930038	0.952882	0.955702
0.988347			0.856949	0.915626	0.937983	0.916294
0.997387			0.883227	0.905102	0.964782	0.963684
1.01867			0.910259	0.910313	0.973213	0.949673
0.978651			0.882504	0.945086	0.943991	0.96455
0.965459			0.910638	0.913506	0.946204	0.96455
1.00526			0.914004	0.973416	0.95202	0.965088
0.980745			0.8766	0.925382	0.926219	0.976268
0.977399			0.898274	0.912212	0.977852	0.935508
0.97615			0.916474	0.917807	0.939491	0.940362
0.986254			0.864326	0.912264	0.97986	0.93109
0.974947			0.906709	0.930567	0.97986	0.978858
0.985843			0.898577	0.92359	0.965315	0.972288
0.982891			0.898126	0.944343	0.976729	0.932916
0.982051			0.893655	0.913009	0.977211	0.955648
0.98669			0.938953	0.933942	0.937029	0.985697
0.968803			0.901877	0.9044	0.99711	0.962829
0.985433				0.89077	0.982936	0.938517
0.992235				0.919014	0.948482	0.952718
0.966387				0.911182	0.940441	0.940206
0.966821				0.933005	0.943901	0.949433
0.992241				0.912548	0.939303	0.949433
1.00174				0.905183	0.953345	0.921134
0.992669				0.921991	0.927542	0.976503
0.985036				0.927524	0.93826	0.968789
0.990542				0.923099	0.983759	0.98734
0.978344				0.897525	0.964554	0.966381
0.982935				0.913301	0.972539	0.969089
0.986724				0.921421	0.934024	0.968184
0.97876				0.88267	0.975453	0.953066
0.983788				0.952755	0.960509	0.952736
0.969315				0.907807	0.932257	0.944359
1.00043				0.918331	0.947435	0.934666
0.972996				0.934977	0.95428	0.984912
0.966066				0.905252	0.95428	0.950451
0.988014				0.894903	0.932796	0.953289
0.974251				0.944607	0.963228	0.979127
0.956486				0.903807	0.942952	0.958472
0.987591				0.936127	0.982915	0.959627
0.997838				0.943141	0.931766	0.936592
0.976311				0.936531	0.958023	0.930886
0.97384				0.953624	0.958023	0.987049
0.975074				0.919548	0.98882	0.937746
0.984222				0.917636	0.966796	0.933975
0.982546				0.934288	0.950388	0.945172
0.999134				0.932237	0.955898	0.970595
0.981293				0.939186	0.964147	0.956618
0.984642				0.940782	0.975218	0.944832
1.00174				0.879987	0.966422	0.889532
0.976331				0.97515	0.947398	0.949413
0.992268				0.906664	0.969198	0.951998
0.976744				0.949024	0.960995	0.9743
0.979661				0.950589	0.983316	0.966845
1.00741				0.907347	0.934684	0.958162
0.992275				0.926071	1.04181	0.95234
0.985507				0.944146	0.9601	0.951316
0.989303				0.913908	0.965126	0.964854
0.980076				0.888504	0.990827	0.951276
0.997412				0.921836	0.977749	0.985498
0.978849				0.919993	1.00253	0.939786
0.972678				0.89892	0.964501	0.931599
0.973496				0.937974	0.91978	0.965589
0.990158				0.909981	0.957664	0.956153
0.977196				0.916678	0.948371	0.969768
0.983844				0.893534	0.991503	0.969768
0.991006				0.93872	0.989849	0.949148
0.97598				0.938545	0.959761	0.96115
0.973518				0.960165	0.959761	0.976093
0.981356				0.916382	0.939815	0.973457
0.98011				0.890414	0.939815	0.941784
0.986371				0.919298	0.953529	0.952582
0.967823				0.922649	0.987487	0.971822
1.00173				0.904978	1.00283	0.959188
0.960232				0.929574	0.959682	0.942535
0.980956				0.925431	0.967922	0.937263
0.991446				0.94492	1.02285	0.997975
0.987644				0.947359	1.00168	0.97624
0.981372				0.945521	0.968222	0.951009
0.998277				0.908074	1.01254	0.93842
0.967877				0.882937	0.946272	0.94082
0.988917				0.898979	0.965035	0.955991
0.956307				0.920212	0.945937	0.963687
0.989339				0.932113	0.964337	0.955769
0.989761				0.927921	0.964472	0.956942
0.98472				0.939625	0.963551	0.966743
0.996992				0.915822	0.971692	0.939954
0.976451				0.915056	0.943293	0.95739
0.999139				0.942208	0.953679	0.948508
0.979747				0.936394	1.00422	0.960367
1.00476				0.917687	0.999094	0.963209
0.981403				0.94888	0.982559	0.947437
0.985151				0.940881	0.950865	0.964695
1.00129				0.929406	0.964807	0.957731
0.990614				0.939751	0.975543	0.956307
0.970736				0.950629	0.947604	0.933705
0.981005				0.913394	0.961075	0.941961
0.981005				0.919862	0.965677	0.961255
0.998712				0.917815	0.980317	0.933124
0.980607				0.892538	0.980317	0.936954
0.991052				0.950168	0.954548	0.966268
1.00215				0.87463	0.918928	0.957346
1.01351				0.890751	0.959628	0.963494
1.00562				0.913114	0.966356	0.960638
0.998713				0.920625	0.957758	0.962987
0.989796				0.897974	0.948751	0.95211
0.981864				0.923726	0.955787	0.93951
0.988955				0.905624	0.991647	0.935154
0.992751				0.982132	0.95772	0.964027
1.0135				0.92946	0.95772	0.947292
0.988955				0.954274	0.917659	0.950159
1.00345				0.950928	0.981323	0.942969
0.984772				0.907877	0.988012	0.925897
0.988955				0.898623	0.989016	0.92003
0.952537				0.947197	0.950051	0.949744
0.968386				0.891959	0.984154	0.964464
0.981466				0.938515	0.962228	0.959008
0.983122				0.938091	0.976928	0.95286
0.982708				0.902329	0.954463	0.897013
0.984368				0.966465	1.00846	0.944515
0.954527				0.946971	0.955059	0.964308
0.965203				0.875343	0.934275	0.933228
0.994456				0.882565	0.934889	0.968751
0.986881				0.919623	0.997247	0.975233
0.989393				0.921033	0.940183	0.940682
0.968465				0.897447	0.922592	0.95564
0.985251				0.908263	0.995176	0.973591
0.993631				0.925905	0.966386	0.957208
0.986094				0.899226	0.967379	0.949512
0.966942				0.883707	0.987992	0.950592
0.962628				0.923509	0.855203	0.94179
0.976705				0.885528	0.943848	0.948901
0.989048				0.933393	0.904554	0.987862
0.967051				0.89912	0.977045	0.889697
0.951032				0.889704	0.9554	0.95973
0.964754				0.889126	0.984573	0.952967
0.96761				0.890849	0.90485	0.968592
0.98049				0.925717	0.937125	0.902753
0.98459				0.904704	0.943804	0.942742
0.964169				0.90536	0.950391	0.888088
0.972884				0.981605	0.915127	0.947818
0.987078				0.905645	0.963832	0.904935
0.980992				0.937754	0.952236	0.92802
0.983864				0.902744	0.953898	0.936462
0.973813				0.923311	0.953254	0.965873
0.957361				0.91045	0.975024	0.959997
0.950479				0.916107	0.963469	0.965257
0.967087				0.921322	0.959846	0.957652
0.955475				0.908566	0.949252	0.934233
0.97543				0.908671	0.935695	0.944746
0.971452				0.922212	0.925381	0.955887
0.984298				0.934259	0.951713	0.952242
0.983891				0.942201	0.966141	1.01364
0.956278				0.942497	0.95656	0.943201
0.977869					0.946349	0.984402
0.977087					0.985427	0.938155
0.961353					0.93014	0.967303
0.971917					0.98485	0.948664
0.957498					0.943035	0.942839
0.985149					0.909539	0.951404
0.979893					0.936224	0.942944
0.986788					0.952141	0.970772
0.961384					0.920711	0.967982
0.99335					0.958112	0.972537
0.984349					0.925295
0.976346					0.975627
0.974797					0.956393
0.999167					0.964263
0.958466					0.924623
0.974442					0.970452
0.988884					0.941638
0.980808					0.936926
0.986043					0.97514
1.01392					0.938763
0.992984					0.954337
0.973323					0.942516
0.9881					0.921679
0.977273					0.969985
0.967068					0.952046
0.969404					0.95163
0.961661					0.973357
0.968624					0.962846
0.967121					0.954933
0.971429					0.939309
0.991783					0.949224
0.981301					1.01586
0.970281					0.869776
0.973409					0.979792
0.980519					0.934819
0.980122					0.965212
0.968337					0.940124
0.99018					0.937224
0.982157					0.961422
0.969188					0.926807
0.996713					0.935492
0.994267					0.964192
0.989405					0.951449
0.98101					0.93897
0.958169					0.88317
0.946958					0.975288
0.958169					0.959696
0.989405					0.953903
0.977456					0.960786
0.950117					0.963104
0.994696					0.940923
0.990669					1.03124
0.970612					0.973419
0.982315					0.949619
0.976038					0.959312
1.00164					0.922863
0.961478					0.909483
0.985507					0.911401
0.951049					0.95556
0.988691					0.951624
0.977636					0.92951
0.973747					0.960205
0.984739					0.94406
0.981208					0.965727
0.973037					0.985428
0.961283					0.911772
0.988349					0.959449
0.968123					0.941326
0.982442					0.96112
0.970461					0.944435
0.995556					0.945528
0.980127					0.971989
0.961778					0.964478
0.969721					0.953322
0.962559					0.942623
0.980143					0.966824
0.977813					0.945837
1.01355					0.944435
0.977813
0.977813
0.984444
0.962559
0.977813
0.973954
0.981746
0.963424
0.975187
0.965329
0.971026
0.994387
0.981028
0.971809
0.971071
0.99361
0.970359
0.983788
0.99163
0.977987
0.971116
0.981847
0.985759
0.974961
0.972741
0.989707
0.981547
0.989315
