# Supplementary material for: Sex-specific characteristics of special endurance and performance potential in female runners
Source: BMC Res Notes. 2025 Apr 26;18:196. doi: 10.1186/s13104-025-07256-6 (PMC12032771; doi:10.1186/s13104-025-07256-6)
Supplement: Supplementary file 15 — Supplementary Material 15 [file 13104_2025_7256_MOESM15_ESM.xlsx]

## Sheet: 100-200
name, first name	date of birth	nation	sec 100m	sec 200m	KsA	average KsA
ABBA Ezinne	01 NOV 2000	USAUSA	10.98	22.47	0.977303	0,985471
AHOURÉ Murielle	23 AUG 1987	CIVCIV	10.78	22.24	0.969424
AHYE Michelle-Lee	10 APR 1992	TTOTTO	10.82	22.25	0.972584
AKINOSUN Morolake	17 MAY 1994	USAUSA	10.95	22.44	0.975936
ALFRED Julien	10 JUN 2001	LCALCA	10.81	21.91	0.986764
ANDERSON Alexandria	28 JAN 1987	USAUSA	10.91	22.58	0.966342
ANNELUS Anglerne	10 JAN 1997	USAUSA	11.06	22.16	0.998195
ARRON Christine	13 SEP 1973	FRAFRA	10.73	22.26	0.964061
ASHER-SMITH Dina	04 DEC 1995	GBRGBR	10.83	21.88	0.989945
ASHFORD Evelyn	15 APR 1957	USAUSA	10.76	21.83	0.985799
ATKINS Joanna	31 JAN 1989	USAUSA	11.02	22.27	0.989672
AUERSWALD-LANGE Ingrid	02 SEP 1957	GDRGDR	11.04	22.6	0.976991
AZARASHVILI Maya	06 APR 1964	URSURS	11.08	22.24	0.996403
BAILEY Aleen	25 NOV 1980	JAMJAM	11.04	22.33	0.988804
BARBER Me'Lisa	04 OCT 1980	USAUSA	10.95	22.37	0.97899
BASS Gina	03 MAY 1995	GAMGAM	11.05	22.58	0.978742
BEHRENDT Kerstin	02 SEP 1967	GDRGDR	11.05	22.36	0.988372
BESTUÉ Jaël	24 SEP 2000	ESPESP	11.1	22.54	0.984916
BLACKMON Kennedy	02 OCT 1999	USAUSA	11.02	22.52	0.978686
BOWIE Tori	27 AUG 1990	USAUSA	10.78	21.77	0.990354
BRAHE-PEDERSEN Mia	28 NOV 2005	USAUSA	11.05	22.58	0.978742
BRISCO Mikiah	14 JUL 1996	USAUSA	10.96	22.59	0.970341
BRISCO-HOOKS Valerie	06 JUL 1960	USAUSA	10.99	21.81	1.00779
BROWN Alice	20 SEP 1960	USAUSA	10.92	22.39	0.975435
BROWN Brittany	18 APR 1995	USAUSA	10.9	21.99	0.99136
BRYANT Dezerea	27 APR 1993	USAUSA	10.99	22.18	0.990983
BURRELL-FINN Michelle	08 MAY 1965	USAUSA	11.05	22.39	0.987048
CALVERT-POWELL Schillonie	27 JUL 1988	JAMJAM	10.94	22.55	0.970288
CAMPBELL-BROWN Veronica	15 MAY 1982	JAMJAM	10.76	21.74	0.98988
CHANDLER Caisja	18 JUN 2000	USAUSA	10.99	22.37	0.982566
CHUKWUMA Rosemary	05 DEC 2001	NGRNGR	10.99	22.33	0.984326
CLARK Tamara	09 JAN 1999	USAUSA	10.88	21.92	0.992701
COLANDER LaTasha	23 AUG 1976	USAUSA	10.97	22.34	0.982095
COLLINS Shania	14 NOV 1996	USAUSA	10.92	22.45	0.972829
COOK Kathy	03 MAY 1960	GBRGBR	11.1	22.1	1.00452
CUNLIFFE Hannah	09 JAN 1996	USAUSA	10.99	22.49	0.977323
CUTHBERT Juliet	09 APR 1964	JAMJAM	10.83	21.75	0.995862
DANIELS Teahna	25 MAR 1997	USAUSA	10.83	22.51	0.962239
DAVIS Kevona	20 DEC 2001	JAMJAM	10.95	22.26	0.983827
DAVIS Tamari	15 FEB 2003	USAUSA	10.83	22.3	0.9713
DAVIS-THOMPSON Pauline	09 JUL 1966	BAHBAH	10.97	22.27	0.985182
DE KLERK Evette	21 AUG 1965	RSARSA	11.06	22.06	1.00272
DEL PONTE Ajla	15 JUL 1996	SUISUI	10.9	22.38	0.974084
DOWDIE Peta-Gaye	18 JAN 1977	JAMJAM	11.03	22.51	0.980009
DRECHSLER Heike	16 DEC 1964	GDRGDR	10.91	21.71	1.00507
DUNCAN Kimberlyn	02 AUG 1991	USAUSA	10.96	22.19	0.987832
DURST Stephanie	06 JAN 1982	USAUSA	11.09	22.48	0.986655
EDWARDS Torri	31 JAN 1977	USAUSA	10.78	22.28	0.967684
FACEY Simone	07 MAY 1985	JAMJAM	10.95	22.25	0.98427
FELIX Allyson	18 NOV 1985	USAUSA	10.89	21.69	1.00415
FERGUSON Debbie	16 JAN 1976	BAHBAH	10.91	22.19	0.983326
FRASER-PRYCE Shelly-Ann	27 DEC 1986	JAMJAM	10.6	21.79	0.972923
FREEMAN Octavious	20 APR 1992	USAUSA	10.87	22.55	0.96408
FYNES Savatheda	17 OCT 1974	BAHBAH	10.91	22.32	0.977599
GAITHER TyNia	16 MAR 1993	BAHBAH	11.02	22.41	0.98349
GEORGIEVA Nadezhda	02 SEP 1961	BULBUL	11.09	22.42	0.989295
GEVAERT Kim	05 AUG 1978	BELBEL	11.04	22.2	0.994595
GÖHR Marlies	21 MAR 1958	GDRGDR	10.81	21.74	0.99448
GRIFFITH-JOYNER Florence	21 DEC 1959	USAUSA	10.49	21.34	0.98313
GUIDRY Carlette	04 SEP 1968	USAUSA	10.94	22.14	0.988257
HACKETT Semoy	27 NOV 1988	TTOTTO	11.07	22.51	0.983563
HEMIDA Bassant	28 SEP 1996	EGYEGY	11.02	22.41	0.98349
HENDERSON Ashley	04 DEC 1995	USAUSA	10.96	22.49	0.974655
HENRY Desiree	26 AUG 1995	GBRGBR	11.06	22.46	0.984862
HILL Candace	11 FEB 1999	USAUSA	10.98	22.43	0.979046
HILL D'Andre	19 APR 1973	USAUSA	10.92	22.49	0.971098
HOOKER Marshevet	25 SEP 1984	USAUSA	10.86	22.34	0.972247
HURTIS Muriel	25 MAR 1979	FRAFRA	10.96	22.31	0.982519
HYCHE Holli	06 SEP 1971	USAUSA	11.03	22.34	0.987466
JACKSON Grace	14 JUN 1961	JAMJAM	11.08	21.72	1.02026
JACKSON Shawnti	02 MAY 2005	USAUSA	10.89	22.48	0.968861
JACKSON Shericka	16 JUL 1994	JAMJAM	10.65	21.45	0.993007
JAYASINGHE Susanthika	17 DEC 1975	SRISRI	11.04	22.28	0.991023
JEFFERSON Melissa	21 FEB 2001	USAUSA	10.82	22.46	0.963491
JENKINS LaTasha	19 DEC 1977	USAUSA	11.02	22.29	0.988784
JETER Carmelita	24 NOV 1979	USAUSA	10.64	22.11	0.96246
JOHNSON Kortnei	11 AUG 1997	USAUSA	11.05	22.56	0.97961
JONES Esther	07 APR 1969	USAUSA	11.09	22.47	0.987094
JONES Marion	12 OCT 1975	USAUSA	10.65	21.62	0.985199
JONES-FERRETTE LaVerne	16 SEP 1981	ISVISV	11.07	22.46	0.985752
KAMBUNDJI Mujinga	17 JUN 1992	SUISUI	10.89	22.05	0.987755
KASPRZYK Ewa	07 SEP 1957	POLPOL	10.93	22.13	0.987799
KNIGHT Bianca	02 JAN 1989	USAUSA	11.07	22.35	0.990604
KOCH Marita	18 FEB 1957	GDRGDR	10.83	21.71	0.997697
KONDRATYEVA Lyudmila	11 APR 1958	URSURS	11.02	22.31	0.987898
KRABBE Katrin	22 NOV 1969	GDRGDR	10.89	21.95	0.992255
KRATOCHVÍLOVÁ Jarmila	26 JAN 1951	TCHTCH	11.09	21.97	1.00956
LALOVA-COLLIO Ivet	18 MAY 1984	BULBUL	10.77	22.32	0.965054
LEE Muna	30 OCT 1981	USAUSA	10.85	22.01	0.985915
LEMOS Ana Claudia	06 NOV 1988	BRABRA	11.01	22.48	0.979537
LI Xuemei	05 JAN 1977	CHNCHN	10.79	22.01	0.980463
LIU Xiaomei	11 JAN 1972	CHNCHN	10.89	22.36	0.974061
LONG Mckenzie	11 JUL 2000	USAUSA	11	22.31	0.986105
MALCHUGINA Galina	17 DEC 1962	RUSRUS	10.96	22.18	0.988278
MANI Léonie Myriam	21 MAY 1977	CMRCMR	10.98	22.41	0.97992
MARSHALL Pam	16 AUG 1960	USAUSA	11.01	21.93	1.0041
MASON Symone	31 AUG 1999	USAUSA	11.02	22.49	0.979991
MBOMA Christine	22 MAY 2003	NAMNAM	10.97	21.78	1.00735
MCDONALD Beverly	15 FEB 1970	JAMJAM	10.99	22.22	0.989199
MCGRONE Candyce	24 MAR 1989	USAUSA	11	22.01	0.999546
MILLER Inger	12 JUN 1972	USAUSA	10.79	21.77	0.991272
MILLER-UIBO Shaunae	15 APR 1994	BAHBAH	10.98	21.74	1.01012
MÖLLER Silke	20 JUN 1964	GDRGDR	10.86	21.74	0.99908
MOLOKOVA Marina	24 AUG 1962	URSURS	11.08	22.46	0.986643
MOODY Samirah	08 NOV 2002	USAUSA	11.02	22.5	0.979556
MOORE Ashanti	07 NOV 2000	JAMJAM	11.06	22.49	0.983548
MOORE LaShauntea	31 JUL 1983	USAUSA	10.97	22.4	0.979464
MOREHEAD Brenda	05 OCT 1957	USAUSA	11.08	22.38	0.99017
MOTHERSILL Cydonie	19 MAR 1978	CAYCAY	11.08	22.39	0.989728
MYERS Sandra	09 JAN 1961	ESPESP	11.06	22.38	0.988382
NAIMOVA Tezdzhan	01 MAY 1987	BULBUL	11.04	22.43	0.984396
NEITA Daryll	29 AUG 1996	GBRGBR	10.9	22.23	0.980657
NKU Mercy	17 JUL 1976	NGRNGR	11.03	22.53	0.979139
NUNEVA Anelia	30 JUN 1962	BULBUL	10.85	22.01	0.985915
NWOKOCHA Nzubechi Grace	07 APR 2001	NGRNGR	10.97	22.44	0.977718
ODIONG Edidiong Ofinome	13 MAR 1997	BRNBRN	11.05	22.43	0.985288
OFILI Favour	31 DEC 2002	NGRNGR	10.93	21.96	0.995446
OKAGBARE Blessing	09 OCT 1988	NGRNGR	10.79	22.04	0.979129
ONYALI-OMAGBEMI Mary	03 FEB 1968	NGRNGR	10.97	22.07	0.99411
OTTEY Merlene	10 MAY 1960	JAMJAM	10.74	21.64	0.992606
PASCHKE Melanie	29 JUN 1970	GERGER	11.04	22.45	0.983519
PÉREC Marie-José	09 MAY 1968	FRAFRA	10.96	21.99	0.996817
PHILIPP Andrea	29 JUL 1971	GERGER	11.05	22.25	0.993258
POVH Olesya	18 OCT 1987	UKRUKR	11.08	22.58	0.981399
PRANDINI Jenna	20 NOV 1992	USAUSA	10.92	21.89	0.997716
PRIVALOVA Irina	22 NOV 1968	RUSRUS	10.77	21.87	0.984911
RICHARDSON Sha'Carri	25 MAR 2000	USAUSA	10.71	21.94	0.976299
RICHARDS-ROSS Sanya	26 FEB 1985	USAUSA	10.97	22.09	0.99321
RICHTER Annegret	13 OCT 1950	FRGFRG	11.01	22.39	0.983475
ROSA Vitoria Cristina	12 JAN 1996	BRABRA	11.03	22.47	0.981753
RYEMYEN Mariya	02 AUG 1987	UKRUKR	11.06	22.58	0.979628
SAMUEL Jamile	24 APR 1992	NEDNED	11.1	22.37	0.992401
SCHIPPERS Dafne	15 JUN 1992	NEDNED	10.81	21.63	0.999538
SCHNEIDER-MÜLLER Romy	26 JUL 1958	GDRGDR	11.02	22.47	0.980863
SCOTT Aurieyall	18 MAY 1992	USAUSA	10.96	22.46	0.975957
SEARS Jacious	14 AUG 2001	USAUSA	10.96	22.45	0.976392
SEYNI Aminatou	24 OCT 1996	NIGNIG	11.07	21.98	1.00728
SIMPSON Sherone	12 AUG 1984	JAMJAM	10.82	22	0.983636
SLYUSAR Irina	19 MAR 1963	UKRUKR	11.05	22.59	0.978309
SOLOMON Shalonda	19 DEC 1985	USAUSA	10.9	22.15	0.984199
SOUMARÉ Myriam	29 OCT 1986	FRAFRA	11.03	22.11	0.997739
SOWELL Dawn	27 MAR 1966	USAUSA	10.78	22.04	0.978221
STECHER Renate	12 MAY 1950	GDRGDR	11.07	22.38	0.989276
STEINER Abby	24 NOV 1999	USAUSA	10.9	21.77	1.00138
STEVENS Deajah	19 MAY 1995	USAUSA	11	22.09	0.995926
STEWART Kerron	16 APR 1984	JAMJAM	10.75	21.99	0.977717
STRACHAN Anthonique	22 AUG 1993	BAHBAH	10.92	22.15	0.986005
STURGIS Cambrea	27 MAR 1999	USAUSA	10.87	22.11	0.983265
STURRUP Chandra	12 SEP 1971	BAHBAH	10.84	22.33	0.970891
TA LOU Marie-Josée	18 NOV 1988	CIVCIV	10.72	22.08	0.971014
TABAKOVA Yuliya	01 MAY 1980	RUSRUS	11.1	22.51	0.986228
TAPLIN Cheryl	02 SEP 1972	USAUSA	11.07	22.59	0.98008
TARMOH Jeneba	27 SEP 1989	USAUSA	10.93	22.23	0.983356
TERRY Twanisha	24 JAN 1999	USAUSA	10.82	22.17	0.976094
THOMAS Gabrielle	07 DEC 1996	USAUSA	11	21.6	1.01852
THOMAS Lanae-Tava	28 JAN 2001	USAUSA	11.06	22.38	0.988382
THOMPSON-HERAH Elaine	28 JUN 1992	JAMJAM	10.54	21.53	0.979099
TORRENCE Gwen	12 JUN 1965	USAUSA	10.82	21.72	0.996317
TOWNSEND Tiffany	14 JUN 1989	USAUSA	11.08	22.26	0.995508
TRANDENKOVA Marina	07 JAN 1967	RUSRUS	11.06	22.44	0.98574
VORONOVA Natalya	09 JUL 1965	URSURS	10.98	22.35	0.98255
WASHINGTON Arianna	04 SEP 1996	USAUSA	11.01	22.21	0.991445
WHITE Kayla	24 SEP 1996	USAUSA	10.95	22.01	0.995002
WHITNEY Kaylin	09 MAR 1998	USAUSA	11.1	22.47	0.987984
WHYTE Natalliah	09 AUG 1997	JAMJAM	10.97	22.39	0.979902
WILLIAMS Briana	21 MAR 2002	JAMJAM	10.94	22.5	0.972444
WILLIAMS Charonda	27 MAR 1987	USAUSA	11.07	22.32	0.991935
WILLIAMS Lauryn	11 SEP 1983	USAUSA	10.88	22.27	0.977099
WÖCKEL Bärbel	21 MAR 1955	GDRGDR	10.95	21.85	1.00229
YOUNG-STONE Danette	06 OCT 1964	USAUSA	11.06	22.18	0.997295
ZHIROVA Marina	06 JUN 1963	URSURS	10.98	22.46	0.977738

## Sheet: 200-400
name, first name	date of birth	nation	sec 200m	sec 400m	KsA	average KsA
ADELEKE Rhasidat	29 AUG 2002	IRLIRL	22.34	49.2	0.90813	0.895955
AMERTIL Christine	18 AUG 1979	BAHBAH	22.58	50.09	0.901577
ATKINS Joanna	31 JAN 1989	USAUSA	22.27	50.39	0.883906
BARBER Me'Lisa	04 OCT 1980	USAUSA	22.37	50.87	0.879497
BREUER Grit	16 FEB 1972	GERGER	22.45	49.42	0.908539
BRISCO-HOOKS Valerie	06 JUL 1960	USAUSA	21.81	48.83	0.893303
BRYZGINA Olga	30 JUN 1963	URSURS	22.44	48.27	0.92977
CAMPBELL Juliet	17 MAR 1970	JAMJAM	22.5	50.11	0.898024
CHEESEBOROUGH Chandra	10 JAN 1959	USAUSA	21.99	49.05	0.896636
COLANDER LaTasha	23 AUG 1976	USAUSA	22.34	49.87	0.895929
COLLINS Michelle	12 FEB 1971	USAUSA	22.57	50.11	0.900818
COOK Kathy	03 MAY 1960	GBRGBR	22.1	49.43	0.894194
DAVIS-THOMPSON Pauline	09 JUL 1966	BAHBAH	22.27	49.28	0.903815
DE KLERK Evette	21 AUG 1965	RSARSA	22.06	50.57	0.872454
DIGGS Talitha	22 AUG 2002	USAUSA	22.45	49.93	0.899259
DIXON Diane	23 SEP 1964	USAUSA	22.53	49.84	0.904093
DU Xiujie	27 NOV 1971	CHNCHN	22.53	50.39	0.894225
DUNMORE Makenzie	07 OCT 1997	USAUSA	22.53	50.35	0.894935
ELLIS Kendall	08 MAR 1996	USAUSA	22.59	49.99	0.903781
FELIX Allyson	18 NOV 1985	USAUSA	21.69	49.26	0.880633
FRANCIS Phyllis	04 MAY 1992	USAUSA	22.42	49.61	0.90385
FREEMAN Cathy	16 FEB 1973	AUSAUS	22.25	48.63	0.915073
GONCHARENKO Svetlana	28 MAY 1971	RUSRUS	22.46	50.23	0.894286
GRENOT Libania	12 JUL 1983	ITAITA	22.56	50.3	0.897018
GUSHCHINA Yuliya	04 MAR 1983	RUSRUS	22.53	50.01	0.90102
HALL Patricia	16 OCT 1982	JAMJAM	22.51	50.71	0.887793
HASTINGS Natasha	23 JUL 1986	USAUSA	22.57	49.84	0.905698
HAYES Quanera	07 MAR 1992	USAUSA	22.55	49.72	0.90708
IKAUNIECE Vineta	04 DEC 1962	URSURS	22.49	50.71	0.887005
IRBY Lynna	06 DEC 1998	USAUSA	22.25	49.8	0.893574
JACKSON Grace	14 JUN 1961	JAMJAM	21.72	49.57	0.876336
JACKSON Shericka	16 JUL 1994	JAMJAM	21.45	49.47	0.867192
JONES Marion	12 OCT 1975	USAUSA	21.62	49.59	0.87195
KAPACHINSKAYA Anastasiya	21 NOV 1979	RUSRUS	22.38	50.02	0.894842
KLAVER Lieke	20 AUG 1998	NEDNED	22.46	49.81	0.901827
KNOLL Silke-Beate	21 FEB 1967	GERGER	22.29	50.85	0.876696
KOCEMBOVÁ Taťána	02 MAY 1962	TCHTCH	22.47	48.59	0.924882
KOCH Marita	18 FEB 1957	GDRGDR	21.71	47.6	0.912185
KRATOCHVÍLOVÁ Jarmila	26 JAN 1951	TCHTCH	21.97	47.99	0.915607
LEATHERWOOD Lillie	06 JUL 1964	USAUSA	22.38	49.66	0.901329
MARSHALL Pam	16 AUG 1960	USAUSA	21.93	49.99	0.877375
MASILINGI Beatrice	10 APR 2003	NAMNAM	22.18	49.53	0.895619
MBOMA Christine	22 MAY 2003	NAMNAM	21.78	49.22	0.885006
MCLAUGHLIN-WHILBY Anneisha	06 JAN 1986	JAMJAM	22.54	50.76	0.888101
MILLER-UIBO Shaunae	15 APR 1994	BAHBAH	21.74	48.36	0.89909
MYERS Sandra	09 JAN 1961	ESPESP	22.38	49.67	0.901148
NASER Salwa Eid	23 MAY 1998	BRNBRN	22.51	48.14	0.935189
OGUNKOYA-OSHEKU Falilat	05 DEC 1968	NGRNGR	22.22	49.1	0.905092
PAULINO Marileidy	25 OCT 1996	DOMDOM	22.36	48.98	0.913026
PÉREC Marie-José	09 MAY 1968	FRAFRA	21.99	48.25	0.911503
POSPELOVA Svetlana	24 DEC 1979	RUSRUS	22.39	49.8	0.899197
PRIVALOVA Irina	22 NOV 1968	RUSRUS	21.87	49.89	0.876729
RICHARDS-ROSS Sanya	26 FEB 1985	USAUSA	22.09	48.7	0.907187
SEYNI Aminatou	24 OCT 1996	NIGNIG	21.98	50.69	0.867232
SPRUNGER Lea	05 MAR 1990	SUISUI	22.38	50.52	0.885986
SZEWIŃSKA Irena	24 MAY 1946	POLPOL	22.21	49.29	0.901197
THOMAS Gabrielle	07 DEC 1996	USAUSA	21.6	49.68	0.869565
ŢIRLEA-MANOLACHE Ionela	09 FEB 1976	ROUROU	22.35	49.88	0.896151
TORRENCE Gwen	12 JUN 1965	USAUSA	21.72	49.64	0.875101
WALTHER Gesine	06 OCT 1962	GDRGDR	22.24	50.03	0.889067
WASHINGTON Taylor	06 MAY 1993	USAUSA	22.48	50.25	0.894726
WHITNEY Kaylin	09 MAR 1998	USAUSA	22.47	50.29	0.893617
WILLIAMS Jodie	28 SEP 1993	GBRGBR	22.46	49.97	0.898939
WILLIAMS Shericka	17 SEP 1985	JAMJAM	22.5	49.32	0.912409
WIMBLEY Shakima	23 APR 1995	USAUSA	22.34	49.52	0.902262
WÖCKEL Bärbel	21 MAR 1955	GDRGDR	21.85	49.56	0.881759
YOUNG-STONE Danette	06 OCT 1964	USAUSA	22.18	50.46	0.879112
YUSUF Fatimat	02 MAY 1971	NGRNGR	22.28	49.43	0.901477
ZYKINA Olesya	07 OCT 1980	RUSRUS	22.55	50.15	0.899302

## Sheet: 400-800
name, first name	date of birth	nation	sec 400m	sec 800m	KsA	average KsA
BUSSMANN Gaby	08 OCT 1959	FRGFRG	49.75	118.11	0.842435	0.855155
CALATAYUD Zulia	09 NOV 1979	CUBCUB	50.87	116.09	0.876389
CROOKS Charmaine	08 AUG 1962	CANCAN	50.45	118.52	0.851333
FUCHSOVÁ Helena	03 JUN 1965	CZECZE	50.21	118.56	0.846997
KOTLYAROVA Olga	12 APR 1976	RUSRUS	49.77	117.24	0.849028
KRATOCHVÍLOVÁ Jarmila	26 JAN 1951	TCHTCH	47.99	113.28	0.847281
MILES-CLARK Jearl	04 SEP 1966	USAUSA	49.4	116.4	0.848797
MINEYEVA Olga	01 OCT 1952	URSURS	50.78	114.81	0.884592
MORAA Mary	15 JUN 2000	KENKEN	50.38	116.71	0.863336
MU Athing	08 JUN 2002	USAUSA	49.57	115.04	0.861787
NEUBAUER Dagmar	03 JUN 1962	GDRGDR	49.58	118.36	0.837783
QUIROT Ana Fidelia	23 MAR 1963	CUBCUB	49.61	114.44	0.867005
SEMENYA Caster	07 JAN 1991	RSARSA	49.62	114.25	0.868621
USOVICH Svetlana	14 OCT 1980	BLRBLR	50.79	118.11	0.860046
YEVSEYEVA Inna	14 AUG 1964	URSURS	50.8	117.2	0.866894

## Sheet: 800-1500
name, first name	date of birth	nation	sec 800m	sec 1500m	KsA	average KsA
AGLEDTINOVA Ravilya	10 FEB 1960	URSURS	116.24	238.4	0.91422	0.921396
ALEMU Habitam	09 JUL 1997	ETHETH	116.71	241.41	0.906471
ARAFI Rababe	12 JAN 1991	MARMAR	117.47	238.84	0.922192
ARTYOMOVA Natalya	05 JAN 1963	URSURS	118.05	239.16	0.925505
BAIKAUSKAITĖ Laimutė	10 JUN 1956	URSURS	118.52	240.24	0.925012
BAILEY Shireen	27 SEP 1959	GBRGBR	118.98	242.32	0.920632
BECLEA-SZEKELY Violeta	26 MAR 1965	ROUROU	118.57	238.29	0.932976
BENHASSI Hasna	01 JUN 1978	MARMAR	116.43	242.54	0.900083
BORISOVA Lyudmila	30 JUL 1959	URSURS	116.78	242.13	0.904318
BOULMERKA Hassiba	10 JUL 1968	ALGALG	118.72	235.3	0.946026
BRUNS Ulrike	17 NOV 1953	GDRGDR	117.06	239.9	0.914912
BUKIS Anna	08 SEP 1953	POLPOL	118.51	239.67	0.927134
CALDWELL Abbey	03 JUL 2001	AUSAUS	118.48	241.15	0.921211
ČEPLAK Jolanda	12 SEP 1976	SLOSLO	115.19	242.44	0.890865
CHEBET Winny	20 DEC 1990	KENKEN	118.13	238.2	0.929865
CHEPCHIRCHIR Nelly	04 JUN 2003	KENKEN	118.23	238.96	0.927692
CHIZHENKO Yuliya	30 AUG 1979	RUSRUS	117.07	235.68	0.931374
CICHOCKA Angelika	15 MAR 1988	POLPOL	118.41	241.61	0.918914
DEBUES-STAFFORD Gabriela	13 SEP 1995	CANCAN	118.7	236.12	0.942582
DEHIBA CHAHYD Hind	17 MAR 1979	FRAFRA	118.67	239.76	0.928037
DJATÉ-TAILLARD Patricia	03 JAN 1971	FRAFRA	116.53	242.26	0.901898
DORIO Gabriella	26 JUN 1957	ITAITA	117.66	238.65	0.924419
ENNAOUI Sofia	30 AUG 1995	POLPOL	118.98	239.7	0.930695
FAVOR HAMILTON Suzy	08 AUG 1968	USAUSA	118.1	237.4	0.932761
GASSER Sandra	27 JUL 1962	SUISUI	118.9	241.1	0.924668
GHICAN Viorica	09 JUN 1965	ROUROU	118.96	242.76	0.918809
GORELOVA Natalya	18 APR 1973	RUSRUS	117.9	239.7	0.922247
GRACE Kate	24 OCT 1988	USAUSA	117.2	241.33	0.910579
GURINA Lyubov	06 AUG 1957	URSURS	115.56	242.47	0.893616
HAILU Freweyni	12 FEB 2001	ETHETH	117.57	236.28	0.932977
HASSAN Sifan	01 JAN 1993	NEDNED	116.81	231.95	0.94425
HILTZ Nikki	23 OCT 1994	USAUSA	119.03	239.61	0.931435
HOFFMEISTER Gunhild	06 JUL 1944	GDRGDR	118.61	241.4	0.921267
HOLMES Kelly	19 APR 1970	GBRGBR	116.21	237.9	0.915905
HURTA Sage	23 JUN 1998	USAUSA	117.85	241.79	0.913887
IVAN Paula	20 JUL 1963	ROUROU	116.42	233.96	0.933012
JACOBS Regina	28 AUG 1963	USAUSA	118.08	240.35	0.921157
JAMAL Maryam Yusuf	16 SEP 1984	BRNBRN	117.8	236.18	0.935198
JEPKOSGEI Janeth	13 DEC 1983	KENKEN	116.04	242.32	0.897883
JEPKOSGEI Nelly	14 JUL 1991	BRNBRN	118.96	240.99	0.925557
JING Liu	03 FEB 1971	CHNCHN	118.55	237.03	0.937777
KAZANKINA Tatyana	17 DEC 1951	URSURS	114.94	232.47	0.927055
KIPYEGON Faith	10 JAN 1994	KENKEN	117.68	229.11	0.963075
KITOVA Svetlana	25 JUN 1960	URSURS	118.08	241.02	0.918596
KLINGER Margrit	22 JUN 1960	FRGFRG	117.22	242.66	0.905743
KLOCOVÁ Lucia	20 NOV 1983	SVKSVK	118.51	242.99	0.914467
KOSTETSKAYA Yekaterina	31 DEC 1986	RUSRUS	116.67	241.77	0.904811
KREMLYOVA Lyubov	21 DEC 1961	URSURS	118.95	238.71	0.934319
LANG Yinglai	22 AUG 1979	CHNCHN	117.62	231.34	0.953305
LANGAT Nancy Jebet	22 AUG 1981	KENKEN	117.75	240.13	0.919424
LANGE-HAHMANN Andrea	03 JUN 1966	GDRGDR	117.31	240.07	0.916217
LI Liu	12 MAR 1971	CHNCHN	116.96	239.34	0.91627
LIU Dong	24 DEC 1973	CHNCHN	115.54	236.31	0.916751
LOVIN Fita	14 JAN 1951	ROUROU	116.67	240.12	0.911029
LU Yi	10 APR 1974	CHNCHN	117.77	240.05	0.919886
MARTINEZ Brenda	08 SEP 1987	USAUSA	117.91	240.94	0.917578
MASTERKOVA Svetlana	17 JAN 1968	RUSRUS	115.87	237.11	0.916268
MELINTE Doina	27 DEC 1956	ROUROU	115.05	236.7	0.911359
MESELE Worknesh	11 JUN 2001	ETHETH	118.71	237	0.939161
MESHESHA Hirut	20 JAN 2001	ETHETH	118.54	234.87	0.946321
MUIR Laura	09 MAY 1993	GBRGBR	116.73	234.5	0.933342
MUTOLA Maria de Lurdes	27 OCT 1972	MOZMOZ	115.19	241.5	0.894332
NANYONDO Winnie	23 AUG 1993	UGAUGA	118.63	239.56	0.928499
OEHME Heike	11 NOV 1963	GDRGDR	118.16	242.9	0.912104
OLIZARENKO Nadezhda	28 NOV 1953	URSURS	113.43	239.48	0.888096
PETROVA Totka	17 DEC 1956	BULBUL	116.59	240.15	0.91029
PODKOPAYEVA Yekaterina	11 JUN 1952	URSURS	115.96	236.65	0.918762
PROVIDOKHINA Tatyana	26 MAR 1953	URSURS	115.46	238.37	0.908199
PUICĂ Maricica	29 JUL 1950	ROUROU	118.12	237.22	0.933627
QU Yunxia	25 DEC 1972	CHNCHN	116.24	230.46	0.945717
REEKIE Jemma	06 MAR 1998	GBRGBR	116.9	238.65	0.918448
ROGACHOVA Lyudmila	30 OCT 1966	URSURS	116.82	236.91	0.92456
SACRAMENTO Carla	10 DEC 1971	PORPOR	118.94	237.71	0.93817
SEMENYA Caster	07 JAN 1991	RSARSA	114.25	239.92	0.892876
SHTEREVA Nikolina	21 JAN 1955	BULBUL	115.42	242.33	0.893049
SNOWDEN Katie	09 MAR 1994	GBRGBR	118	240.04	0.921721
SOBOLEVA Yelena	03 OCT 1982	RUSRUS	117.28	236.43	0.930085
SOROKINA Tamara	15 AUG 1950	URSURS	117.55	238.89	0.922627
SUM Eunice Jepkoech	10 APR 1988	KENKEN	116.99	241.54	0.908157
TROST Katharina	28 JUN 1995	GERGER	118.68	242.32	0.91831
UCENY Morgan	10 MAR 1985	USAUSA	118.37	240.06	0.924534
ULLRICH-KÖRNER Hildegard	20 DEC 1959	GDRGDR	117.2	238.67	0.920727
VESELKOVA Lyudmila	25 OCT 1950	URSURS	115.96	242.37	0.897079
WADE Kirsty	06 AUG 1962	GBRGBR	117.42	240.73	0.914562
WANG Qingfen	27 MAR 1973	CHNCHN	118.69	238.97	0.931262
WANG Yuan	08 APR 1976	CHNCHN	117.18	239.81	0.916194
WARTENBERG Christiane	27 OCT 1956	GDRGDR	118.63	237.71	0.935725
WELTEJI Diribe	13 MAY 2002	ETHETH	117.02	235.08	0.933352
WILLARD Anna	31 MAR 1984	USAUSA	118.8	239.38	0.930529
WYSOCKI Ruth	08 MAR 1957	USAUSA	118.65	240.18	0.926258
YACHMENEVA Marina	14 JUL 1961	URSURS	118.84	242.84	0.917579
YEVDOKIMOVA Natalya	17 MAR 1978	RUSRUS	118.75	237.73	0.936593
ZAKHAROVA Galina	07 SEP 1956	URSURS	117.08	237.72	0.92346
ZAVYALOVA Yekaterina	01 MAR 1991	RUSRUS	117.53	240.11	0.917782
ZAYTSEVA Zamira	16 FEB 1953	URSURS	116.21	236.14	0.922731
ZBROZHEK Oksana	12 JAN 1978	RUSRUS	118.06	240.86	0.91905
ZÚÑIGA Maite	28 DEC 1964	ESPESP	117.45	240.59	0.915328

## Sheet: 1500-3000
name, first name	date of birth	nation	sec 1500m	sec 3000m	KsA	average KsA
ABEYLEGESSE Elvan	1982-09-11	TURTUR	238.28	511.94	0.93089	0.932797
ALAOUI SELSOULI Mariem	1984-04-08	MARMAR	240.77	509.52	0.945086
ARTYOMOVA Natalya	1963-01-05	URSURS	239.16	511.67	0.934821
BABCOCK Courtney	1972-06-30	CANCAN	241.99	523.18	0.925074
BAHTA Meraf	1989-06-24	SWESWE	240.49	517.5	0.92943
BELETE Mimi	1988-06-09	BRNBRN	240.08	510	0.94149
BENTHAMI-GHEZIELLE Bouchra	19 MAY 1979	FRAFRA	241.28	515.41	0.936264
BORISOVA Lyudmila	1966-08-03	RUSRUS	242.13	520.78	0.929874
BRAGINA Lyudmila	1943-07-24	URSURS	241.38	507.12	0.951964
BRUNET Roberta	20 MAY 1965	ITAITA	243.01	515.65	0.942539
BRUNS Ulrike	1953-11-17	GDRGDR	239.9	516.38	0.929161
BUDD Zola	26 MAY 1966	GBRGBR	239.96	508.83	0.943183
BURKA Gelete	1986-01-23	ETHETH	238.79	505.92	0.943983
BÜRKI Cornelia	03 OCT 1953	SUISUI	239.9	518.71	0.924987
CHALMERS Angela	1963-09-06	CANCAN	241.61	512.17	0.943476
CHEBET Brenda	16 MAR 2004	KENKEN	241.25	524.08	0.920661
CHECA Dolores	27 DEC 1982	ESPESP	242.77	517.78	0.937734
CHERONO Mercy	07 MAY 1991	KENKEN	241.26	501.14	0.962845
CHOJECKA Lidia	1977-01-25	POLPOL	239.22	511.69	0.935019
CHURBANOVA Olga	1965-07-16	RUSRUS	242.1	520.48	0.930295
COURTNEY-BRYANT Melissa	1993-08-30	GBRGBR	238.01	519.2	0.916834
CRANNY Elise	09 MAY 1996	USAUSA	238.88	509.95	0.936876
DA FONSECA-WOLLHEIM Kristina	1972-02-10	GERGER	241.42	517.3	0.933385
DEBUES-STAFFORD Gabriela	1995-09-13	CANCAN	236.12	518.51	0.910764
DEFAR Meseret	1983-11-19	ETHETH	242	504.51	0.959347
DIBABA Genzebe	1991-02-08	ETHETH	230.07	501.29	0.917912
DONG Yanmei	1977-02-16	CHNCHN	235.07	513.07	0.916327
DVIRNA Olga	1953-02-11	URSURS	234.23	516.4	0.907165
EMBAYE Axumawit	18 OCT 1994	ETHETH	238.8	523.83	0.911746
FERNÁNDEZ Nuria	1976-08-16	ESPESP	240.2	518.05	0.927324
GEZAHEGNE Kalkidan	08 MAY 1991	BRNBRN	240.97	514.65	0.936442
GHICAN Viorica	1965-06-09	ROUROU	242.76	522.39	0.929421
GRAHAM Yvonne	1965-08-22	JAMJAM	241.84	517.07	0.935425
GRUNEWALD Gabriele	1986-06-25	USAUSA	241.48	522.64	0.924078
GUSKOVA Svetlana	1957-08-19	URSURS	237.05	509.36	0.930776
HAILU Freweyni	2001-02-12	ETHETH	236.28	506.61	0.932789
HAILU Lemlem	25 MAY 2001	ETHETH	240.32	509.43	0.943486
HASSAN Sifan	1993-01-01	NEDNED	231.95	498.49	0.93061
HOULIHAN Shelby	1993-02-08	USAUSA	234.99	517.4	0.908349
HULL Jessica	22 OCT 1996	AUSAUS	237.29	511.81	0.927258
IVAN Paula	1963-07-20	ROUROU	233.96	507.15	0.922646
JACOBS Regina	1963-08-28	USAUSA	240.35	519.56	0.925206
JAMAL Maryam Yusuf	1984-09-16	BRNBRN	236.18	508.87	0.928253
JEBITOK Edinah	2001-11-10	KENKEN	242	522.34	0.9266
JELAGAT Irene	10 DEC 1988	KENKEN	242.59	508.51	0.954121
KAZANKINA Tatyana	17 DEC 1951	URSURS	232.47	502.62	0.925033
KIBIWOT Viola Jelagat	22 DEC 1983	KENKEN	239.25	504.41	0.948633
KIPYEGON Faith	1994-01-10	KENKEN	229.11	503.55	0.909979
KLOSTERHALFEN Konstanze	1997-02-18	GERGER	238.92	500.07	0.955546
KOMYAGINA Olga	1974-02-10	RUSRUS	242.32	522.58	0.927399
KOSTER Maureen	1992-07-03	NEDNED	239.79	515.93	0.929545
KRAUS Brigitte	1956-08-12	FRGFRG	241.54	515.11	0.937819
KRUMINS Susan	1986-07-08	NEDNED	242.25	514.41	0.941856
LAN Lixin	1979-02-14	CHNCHN	233.97	519.67	0.900456
LI Ying	1975-06-24	CHNCHN	241.71	522.39	0.925401
MARANGA Jackline	16 DEC 1977	KENKEN	237.41	518.02	0.916606
MĂRĂŞESCU Natalia	03 OCT 1952	ROUROU	238.2	513.53	0.927697
MCCOLGAN Eilish	1990-11-25	GBRGBR	240.97	511	0.943131
MCCOLGAN Liz	24 MAY 1964	GBRGBR	241.38	518.23	0.931555
MELINTE Doina	27 DEC 1956	ROUROU	236.7	517.11	0.915473
MERRILL Janice	1956-06-18	USAUSA	242.61	522.6	0.928473
MEYER Elana	10 OCT 1966	RSARSA	242.15	512	0.945898
MUGO Naomi	1977-01-02	KENKEN	238.12	523.55	0.909636
MUIR Laura	09 MAY 1993	GBRGBR	234.5	510.53	0.918653
MURRAY Yvonne	04 OCT 1964	GBRGBR	241.2	509.02	0.947703
OBIRI Hellen	13 DEC 1989	KENKEN	237.05	500.68	0.946912
O'SULLIVAN Sonia	1969-11-28	IRLIRL	238.85	501.64	0.952277
OUAZIZ Zahra	20 DEC 1969	MARMAR	240.6	506.48	0.950087
PAVEY Joanne	1973-09-20	GBRGBR	241.79	511.27	0.945841
POZDNYAKOVA Tetyana	04 MAR 1956	URSURS	236.5	512	0.923828
PUICĂ Maricica	1950-07-29	ROUROU	237.22	507.83	0.93425
QU Yunxia	25 DEC 1972	CHNCHN	230.46	492.18	0.936487
REID Sheila	1989-08-02	CANCAN	242.96	524.02	0.927293
RODRÍGUEZ Natalia	1979-06-02	ESPESP	239.51	515.86	0.928585
ROMANOVA Giana	10 MAR 1955	URSURS	239.01	521.8	0.916098
ROMANOVA Yelena	20 MAR 1963	URSURS	240.91	510.45	0.943912
ROWBURY Shannon	1984-09-19	USAUSA	236.29	509.93	0.926755
RUNYAN Marla	1969-01-04	USAUSA	242.95	519.36	0.935575
SACRAMENTO Carla	10 DEC 1971	PORPOR	237.71	510.22	0.931794
SAMUEL Alemaz	1999-07-05	ETHETH	241.78	517.68	0.934091
SCHWEIZER Karissa	04 MAY 1996	USAUSA	240.02	520.25	0.92271
SIMPSON Jenny	1986-08-23	USAUSA	237.22	509.58	0.931041
SIPATOVA Yelena	1955-06-07	URSURS	239.48	513.53	0.932682
SMEKHNOVA Raisa	1950-09-16	URSURS	239.8	521.77	0.919179
SMOLKA Lyubov	1952-11-29	URSURS	240.8	516	0.933333
SZABO Gabriela	1975-11-14	ROUROU	236.97	501.42	0.945196
TANAKA Nozomi	1999-09-04	JPNJPN	239.19	520.84	0.918478
TEFERI Senbere	03 MAY 1995	ETHETH	241.86	512.49	0.943862
TOMASHOVA Tatyana	1975-07-01	RUSRUS	236.91	505.56	0.937218
TSEGAY Gudaf	1997-06-23	ETHETH	234.01	505.23	0.92635
TURAVA Alesia	06 DEC 1979	BLRBLR	239.89	512.89	0.935444
TWELL Stephanie	1989-08-17	GBRGBR	242.54	520.98	0.931091
ULMASOVA Svetlana	1953-02-04	URSURS	238.76	506.78	0.942263
WAITZ Grete	01 OCT 1953	NORNOR	240.55	511.75	0.940107
WAMI Gete	11 DEC 1974	ETHETH	241.47	507.62	0.951381
WANG Junxia	1973-01-09	CHNCHN	231.92	486.11	0.954187
WEIGHTMAN Laura	1991-07-01	GBRGBR	240.09	506.07	0.948841
WEYERMANN Anita	08 DEC 1977	SUISUI	238.2	515.83	0.92356
WILLIAMS Lynn	1960-07-11	CANCAN	240.27	517.3	0.928939
YEGOROVA Olga	28 MAR 1972	RUSRUS	239.47	503.26	0.951675
YIN Lili	1979-11-11	CHNCHN	233.91	521.05	0.897841
YORDANOVA Daniela	08 MAR 1976	BULBUL	239.1	510.59	0.936564
YUSHINA Alla	1958-08-20	URSURS	240.26	514.02	0.934827
ZADOROZHNAYA Yelena	03 DEC 1977	RUSRUS	239.94	505.4	0.949505
ZAKHAROVA Galina	1956-09-07	URSURS	237.72	513.4	0.926062
ZAYTSEVA Zamira	1953-02-16	URSURS	236.14	515.74	0.915733
ZHANG Linli	06 MAR 1973	CHNCHN	237.46	496.5	0.956536
ZHANG Li-rong	03 MAR 1973	CHNCHN	239.7	501.84	0.955285
				3000m

## Sheet: 3000-5000
name, first name	date of birth	nation	sec 3000m	sec 5000m	KsA	average KsA
ABEYLEGESSE Elvan	1982-09-11	TURTUR	511.94	864.68	0.986762	0.971666
ADERE Berhane	1973-11-23	ETHETH	505.62	869.32	0.969378
AKIDOR Margaret	2002-06-26	KENKEN	511.45	884.83	0.963368
ALAOUI SELSOULI Mariem	1984-04-08	MARMAR	509.52	876.52	0.968831
ALEMU Derebe	1983-06-05	ETHETH	522.1	900.56	0.966251
ANTENEH Emebet	1992-01-13	ETHETH	523.2	883.29	0.987218
ARTYOMOVA Natalya	1963-01-05	URSURS	511.67	894.08	0.953811
AUGUSTO Jessica	1981-11-08	PORPOR	521.53	877.07	0.991046
AYALEW Wude	1987-07-04	ETHETH	510.93	878.44	0.969389
AYANA Almaz	1991-11-21	ETHETH	502.22	852.59	0.981754
BABCOCK Courtney	1972-06-30	CANCAN	523.18	894.98	0.974286
BAHTA Meraf	1989-06-24	SWESWE	517.5	889.95	0.969156
BARSOSIO Sally	21 MAR 1978	KENKEN	515.89	886.71	0.969671
BELAYNEH Fantaye	2000-09-15	ETHETH	523.82	884.51	0.987025
BELETE Mimi	1988-06-09	BRNBRN	510	894.71	0.950029
BELKACEM Yamna	1974-02-20	FRAFRA	518.13	887.79	0.972696
BOGOMOLOVA Galina	15 OCT 1977	RUSRUS	522.03	899.72	0.967023
BONDARENKO Olga	1960-06-02	URSURS	513.99	895.76	0.956339
BREA Joselyn Daniely	1994-08-12	VENVEN	523.26	887.76	0.98236
BRUNET Roberta	20 MAY 1965	ITAITA	515.65	884.5	0.971641
BUDD Zola	26 MAY 1966	GBRGBR	508.83	888.07	0.954936
BURKA Gelete	1986-01-23	ETHETH	505.92	871.2	0.96786
BUSIENEI Selah	27 DEC 1991	KENKEN	522.01	888.24	0.979484
CAN Yasemin	11 DEC 1996	TURTUR	513.29	876.82	0.975666
CHEBET Beatrice	05 MAR 2000	KENKEN	505.01	852.92	0.986826
CHECA Dolores	27 DEC 1982	ESPESP	517.78	886.3	0.973673
CHELANGAT Sarah	2001-06-05	UGAUGA	512.53	880.88	0.969731
CHELANGAT Sheila	1998-04-11	KENKEN	516.2	880.51	0.977085
CHEMNUNG Loice	1997-02-22	KENKEN	520.08	883.65	0.980931
CHENONGE Ines	1982-02-01	KENKEN	517.17	879.19	0.980391
CHEPCHUMBA Pamela	08 MAR 1979	KENKEN	522.24	896.75	0.970616
CHEPCHUMBA Peninah	1985-01-14	KENKEN	520.12	900.26	0.962907
CHEPKEMEI Susan	1975-06-25	KENKEN	523.95	895.27	0.975404
CHEPKOECH Beatrice	1991-07-06	KENKEN	502.92	879.33	0.953226
CHEROMEI Lydia	11 MAY 1977	KENKEN	509.14	886.72	0.956973
CHERONO Eva	1996-08-15	KENKEN	521.69	870.77	0.998522
CHERONO Gladys	12 MAY 1983	KENKEN	514.05	887.12	0.965766
CHERONO Mercy	07 MAY 1991	KENKEN	501.14	873.95	0.955699
CHERONO Priscah Jepleting	1980-06-27	KENKEN	509.06	875.3	0.969306
CHERUIYOT Rose	1976-07-21	KENKEN	519.34	886.41	0.976486
CHERUIYOT Vivian Jepkemoi	1983-09-11	KENKEN	508.66	860.87	0.984779
COURTNEY-BRYANT Melissa	1993-08-30	GBRGBR	519.2	893.82	0.968129
CRANNY Elise	09 MAY 1996	USAUSA	509.95	888.02	0.957092
DA FONSECA-WOLLHEIM Kristina	1972-02-10	GERGER	517.3	898.43	0.959637
DEBUES-STAFFORD Gabriela	1995-09-13	CANCAN	518.51	884.12	0.97745
DEFAR Meseret	1983-11-19	ETHETH	504.51	852.88	0.985895
DIBABA Ejegayehu	21 MAR 1982	ETHETH	515.94	872.74	0.985288
DIBABA Genzebe	1991-02-08	ETHETH	501.29	855.41	0.976705
DIBABA Tirunesh	01 OCT 1985	ETHETH	509.55	851.15	0.997768
DIRIBA Buze	1994-02-09	ETHETH	519.65	890.02	0.973105
DIRO Etenesh	10 MAY 1991	ETHETH	518.32	873.3	0.989198
DOMÍNGUEZ Marta	1975-11-03	ESPESP	508.8	888.33	0.9546
DONG Yanmei	1977-02-16	CHNCHN	513.07	869.82	0.983096
EISA Medina	2005-01-03	ETHETH	521.42	856.54	1.01459
EJIGU Sentayehu	1985-06-28	ETHETH	508.41	868.39	0.975771
EL KAMCH Zhor	15 MAR 1973	MARMAR	514.85	882.53	0.972299
FEYSA Hawi	1999-02-01	ETHETH	518.48	873.66	0.989096
FLANAGAN Shalane	1981-07-08	USAUSA	515.34	884.8	0.970728
FLESHMAN Lauren	1981-09-26	USAUSA	523.92	898.48	0.971864
GALVÁN Laura	05 OCT 1991	MEXMEX	520.81	889.34	0.976023
GATERI Teresiah Muthoni	2002-01-05	KENKEN	509.48	884.89	0.959592
GEBRU Azmera	31 OCT 1995	ETHETH	520.01	897.38	0.965793
GEBRZIHAIR Girmawit	2001-11-21	ETHETH	521.88	886.12	0.981583
GEMECHU Tsehay	12 DEC 1998	ETHETH	513.42	869.6	0.984016
GEZAHEGNE Kalkidan	08 MAY 1991	BRNBRN	514.65	892.92	0.960612
GIDEY Letesenbet	20 MAR 1998	ETHETH	500.27	846.62	0.984838
GOUCHER Kara	1978-07-09	USAUSA	514.99	895.02	0.958992
GRØVDAL Karoline Bjerkeli	1990-06-14	NORNOR	513.47	871.07	0.982451
GUSKOVA Svetlana	1957-08-19	URSURS	509.36	902.12	0.941043
HAILU Freweyni	2001-02-12	ETHETH	506.61	863.45	0.977879
HAILU Lemlem	25 MAY 2001	ETHETH	509.43	874.53	0.970864
HAND-PETERS Annette	31 MAY 1965	USAUSA	521.97	896.07	0.97085
HAROYE Alemitu	09 MAY 1995	ETHETH	516.87	883.28	0.975285
HASSAN Sifan	1993-01-01	NEDNED	498.49	853.42	0.973514
HENES Elly	13 OCT 1998	USAUSA	516.86	887.15	0.971012
HOULIHAN Shelby	1993-02-08	USAUSA	517.4	863.92	0.998163
HUDDLE Molly	1984-08-31	USAUSA	522.99	882.64	0.987549
HULL Jessica	22 OCT 1996	AUSAUS	511.81	883.8	0.965169
INFELD Emily	21 MAR 1990	USAUSA	521.29	890.9	0.975212
JACOBS Regina	1963-08-28	USAUSA	519.56	885.35	0.978069
JAMAL Maryam Yusuf	1984-09-16	BRNBRN	508.87	891.68	0.951145
JELAGAT Irene	10 DEC 1988	KENKEN	508.51	895.49	0.946428
JERUTO Norah	02 OCT 1995	KENKEN	513.61	891.73	0.959951
KASTOR Deena	1973-02-14	USAUSA	522.59	891.62	0.976855
KELATI FREZGHI Weini	01 DEC 1996	USAUSA	512.5	893.41	0.956075
KIBET Sylvia Jebiwot	28 MAR 1984	KENKEN	517.47	871.91	0.98915
KIBIWOT Viola Jelagat	22 DEC 1983	KENKEN	504.41	869.5	0.966858
KIDANE Werknesh	1981-01-07	ETHETH	516.39	873.04	0.985808
KIPKEMBOI Margaret Chelimo	1993-02-09	KENKEN	501.53	863.67	0.967827
KIPKIRUI Caroline Chepkoech	26 MAY 1994	KENKEN	509.05	867.55	0.977946
KIPLAGAT Florence	1987-02-27	KENKEN	520.72	880.14	0.986055
KIPYEGO Sally	19 DEC 1985	KENKEN	514.18	870.42	0.984544
KIPYEGON Faith	1994-01-10	KENKEN	503.55	845.2	0.99296
KISA Janet	05 DEC 1992	KENKEN	508.33	878.7	0.964171
KITE Gloria	1998-01-10	KENKEN	509.91	889.22	0.955725
KLOSTERHALFEN Konstanze	1997-02-18	GERGER	500.07	866.76	0.96157
KONGA Pauline	1970-04-10	KENKEN	517.76	887.51	0.972308
KORIKWIANG Pauline Chemning	01 MAR 1988	KENKEN	521.11	881.28	0.985517
KOSTER Maureen	1992-07-03	NEDNED	515.93	887.52	0.968861
KRISTIANSEN Ingrid	21 MAR 1956	NORNOR	514.1	877.33	0.976637
KRUMINS Susan	1986-07-08	NEDNED	514.41	891.25	0.961964
LAN Lixin	1979-02-14	CHNCHN	519.67	885.33	0.978298
LEGHZAOUI Asmae	1976-08-30	MARMAR	513.85	888.31	0.964097
LOBUN Hellen Ekalale	18 MAR 1999	KENKEN	523.33	901.14	0.967904
LOROUPE Tegla	09 MAY 1973	KENKEN	510.95	885.95	0.961209
MAAMA-YVELAIN Fatima	31 DEC 1969	FRAFRA	523.53	898.18	0.971465
MALOT Leah	1972-06-07	KENKEN	515.74	879.83	0.976969
MAMO Meskerem	1999-04-13	ETHETH	513.63	876.89	0.976234
MARKOVC Amy-Eloise	1995-08-05	GBRGBR	520.32	896.6	0.967209
MASAI Edith	1967-04-04	KENKEN	503.23	873.84	0.959806
MASAI Linet Chepkwemoi	05 DEC 1989	KENKEN	518.97	871.14	0.992894
MCCOLGAN Eilish	1990-11-25	GBRGBR	511	868.55	0.980561
MCCOLGAN Liz	24 MAY 1964	GBRGBR	518.23	899.56	0.960155
MELKAMU Meselech	1985-04-19	ETHETH	514.73	871.91	0.983913
MEYER Elana	10 OCT 1966	RSARSA	512	884.05	0.965255
MIKITENKO Irina	1972-08-23	GERGER	510.39	882.03	0.964423
MOHAMED Zakia Mrisho	1984-02-19	TANTAN	519.91	883.87	0.980367
MONSON Alicia	13 MAY 1998	USAUSA	506.81	859.45	0.982818
MOREIRA Sara	17 OCT 1985	PORPOR	522.69	894.71	0.973667
MORGAN Whittni	22 OCT 1997	USAUSA	523.39	902.07	0.967017
MUIR Laura	09 MAY 1993	GBRGBR	510.53	888.14	0.958051
MURIUKI Margaret Wangari	21 MAR 1986	KENKEN	517.97	880.48	0.980469
MURRAY Yvonne	04 OCT 1964	GBRGBR	509.02	896.94	0.945846
MUTUKU Agnes Mwikali	15 DEC 2002	KENKEN	517.17	891.35	0.967016
NGETICH Agnes Jebet	2001-01-23	KENKEN	512.62	876.7	0.974526
NIYONSABA Francine	05 MAY 1993	BDIBDI	499.08	865.34	0.961241
OBIRI Hellen	13 DEC 1989	KENKEN	500.68	858.37	0.972153
OCHICHI Isabella	28 OCT 1979	KENKEN	511.32	878.21	0.970383
OLJIRA Belaynesh	1990-06-26	ETHETH	518.55	882.57	0.979242
O'SULLIVAN Sonia	1969-11-28	IRLIRL	501.64	881.02	0.948976
OUAZIZ Zahra	20 DEC 1969	MARMAR	506.48	872.08	0.967954
PAVEY Joanne	1973-09-20	GBRGBR	511.27	879.96	0.968358
PLUMER Patti Sue	1962-04-27	USAUSA	520.98	900	0.964778
PROKOPČUKA Jeļena	1976-09-21	LATLAT	522.86	887.71	0.981664
RADCLIFFE Paula	17 DEC 1973	GBRGBR	502.2	869.11	0.963054
RENGERUK Lilian Kasait	03 MAY 1997	KENKEN	505.9	863.05	0.976962
RHINES Jennifer	1974-07-01	USAUSA	515.03	894.29	0.959849
RIBEIRO Fernanda	1969-06-23	PORPOR	510.66	876.45	0.971077
ROMANOVA Yelena	20 MAR 1963	URSURS	510.45	899.7	0.945593
ROWBURY Shannon	1984-09-19	USAUSA	509.93	878.92	0.966963
RUDOLPH Amy	1973-09-18	USAUSA	519.86	896.04	0.966958
RUNYAN Marla	1969-01-04	USAUSA	519.36	899.2	0.962633
SAINA Betsy	1988-06-30	KENKEN	518.01	879.49	0.981648
SALPETER Lonah Chemtai	12 DEC 1988	ISRISR	522.88	899.02	0.969352
SAMITOVA-GALKINA Gulnara	1978-07-09	RUSRUS	522.96	873.13	0.998248
SCHWEIZER Karissa	04 MAY 1996	USAUSA	520.25	866.34	1.00086
SCOTT Dominique	1992-06-24	RSARSA	521.33	899.08	0.966414
SHOBUKHOVA Liliya	1977-11-13	RUSRUS	514.85	863.75	0.993439
SIMPSON Jenny	1986-08-23	USAUSA	509.58	896.26	0.947604
SMITH Kimberley	1981-11-19	NZLNZL	515.31	885.93	0.969433
SZABO Gabriela	1975-11-14	ROUROU	501.42	871.48	0.958943
SZENTGYÖRGYI Katalin	1979-01-01	HUNHUN	512.7	902	0.947339
TANAKA Nozomi	1999-09-04	JPNJPN	520.84	893.6	0.971426
TAYE Ejgayehu	2000-02-10	ETHETH	499.52	852.98	0.976029
TEFERI Senbere	03 MAY 1995	ETHETH	512.49	855.24	0.998726
TIMBILILI Alice Jemeli	1983-02-01	KENKEN	520.76	887.06	0.978438
TIROP Agnes Jebet	23 OCT 1995	KENKEN	502.92	860.68	0.973881
TOMASHOVA Tatyana	1975-07-01	RUSRUS	505.56	879.22	0.958349
TSEGAY Gudaf	1997-06-23	ETHETH	505.23	852.29	0.987985
TWELL Stephanie	1989-08-17	GBRGBR	520.98	894.08	0.971166
UTURA Sule	1990-02-08	ETHETH	523.72	884.21	0.987171
VAQUERO Julia	1970-09-18	ESPESP	521.23	884.95	0.981656
WAMI Gete	11 DEC 1974	ETHETH	507.62	870.88	0.971469
WANG Junxia	1973-01-09	CHNCHN	486.11	891.87	0.90841
WANJIRU Veronica	29 OCT 1989	KENKEN	520.81	884.82	0.981009
WEIGHTMAN Laura	1991-07-01	GBRGBR	506.07	875.44	0.963458
WELLINGS Eloise	1982-11-09	AUSAUS	521.78	894.11	0.972625
WEYERMANN Anita	08 DEC 1977	SUISUI	515.83	899.28	0.956006
WIGENE Susanne	1978-02-12	NORNOR	520.23	888.53	0.975825
WILLIAMS Lynn	1960-07-11	CANCAN	517.3	901.3	0.956581
WILLIS-JOHNSON Benita	06 MAY 1979	AUSAUS	518.06	887.6	0.972773
WORKU Ayelech	1979-06-12	ETHETH	512.8	881.23	0.969857
WORKU Fantu	29 MAR 1999	ETHETH	510.76	866.8	0.98208
WYETH Alison	26 MAY 1964	GBRGBR	518.42	900.37	0.959643
YEGOROVA Olga	28 MAR 1972	RUSRUS	503.26	869.32	0.964854
YIN Lili	1979-11-11	CHNCHN	521.05	879.96	0.986882
YORDANOVA Daniela	08 MAR 1976	BULBUL	510.59	896.95	0.948752
ZADOROZHNAYA Yelena	03 DEC 1977	RUSRUS	505.4	880.47	0.956686

## Sheet: 5000-10000
name, first name	date of birth	nation	sec 5000m	sec 10,000m	KsA	average KsA
ABEYLEGESSE Elvan	1982-09-11	TURTUR	864.68	1821.67	0.949327	0.960207
ADERE Berhane	1973-11-23	ETHETH	869.32	1804.18	0.963673
ALEM Mizan	2002-01-22	ETHETH	886.2	1799.03	0.985198
ALEMU Derebe	1983-06-05	ETHETH	900.56	1864.49	0.966012
AUGUSTO Jessica	1981-11-08	PORPOR	877.07	1879.15	0.933475
AYALEW Wude	1987-07-04	ETHETH	878.44	1811.87	0.96965
AYANA Almaz	1991-11-21	ETHETH	852.59	1757.45	0.970258
BAHTA Meraf	1989-06-24	SWESWE	889.95	1868.05	0.952812
BARSOSIO Sally	21 MAR 1978	KENKEN	886.71	1875.38	0.945632
BATTOCLETTI Nadia	2000-04-12	ITAITA	881.3	1866.42	0.944375
BEKELE Bezunesh	1983-01-29	ETHETH	902.48	1870.68	0.964868
BERKUT Nataliya	30 MAY 1975	UKRUKR	899.26	1868.89	0.962347
BLEASDALE Julia	1981-09-09	GBRGBR	902	1855.63	0.972177
BOGOMOLOVA Galina	15 OCT 1977	RUSRUS	899.72	1826.2	0.985347
BONDARENKO Olga	1960-06-02	URSURS	895.76	1857.21	0.96463
BURKA Gelete	1986-01-23	ETHETH	871.2	1826.66	0.953872
BUSCOMB Camille	1990-07-11	NZLNZL	898.59	1873.21	0.959412
BUSIENEI Selah	27 DEC 1991	KENKEN	888.24	1826.4	0.972668
CAN Yasemin	11 DEC 1996	TURTUR	876.82	1826.41	0.960157
CHEBET Emily	1986-02-18	KENKEN	886.89	1847.02	0.960347
CHELANGAT Sarah	2001-06-05	UGAUGA	880.88	1866.46	0.943905
CHELANGAT Sheila	1998-04-11	KENKEN	880.51	1870.27	0.941586
CHEPKIRUI Sheila	27 DEC 1990	KENKEN	894.05	1845.81	0.968735
CHEPKURUI Lineth	1987-02-23	KENKEN	895	1884.2	0.950005
CHEPTAI Irine Chepet	1992-02-04	KENKEN	883.42	1844	0.958156
CHERONO Eva	1996-08-15	KENKEN	870.77	1849.23	0.941765
CHERONO Gladys	12 MAY 1983	KENKEN	887.12	1829.23	0.969938
CHERONO Priscah Jepleting	1980-06-27	KENKEN	875.3	1856.43	0.942993
CHEROTICH Daisy	30 MAY 1997	KENKEN	896.46	1837.31	0.97584
CHERUIYOT Vivian Jepkemoi	1983-09-11	KENKEN	860.87	1772.53	0.971346
CHESANG Stella	01 DEC 1996	UGAUGA	900.72	1861.04	0.967975
CRANNY Elise	09 MAY 1996	USAUSA	888.02	1814.66	0.978718
DANIEL Rahel	2001-11-16	ERIERI	876.66	1812.15	0.967536
DEFAR Meseret	1983-11-19	ETHETH	852.88	1799.2	0.948066
DIBABA Ejegayehu	21 MAR 1982	ETHETH	872.74	1818.39	0.959904
DIBABA Tirunesh	01 OCT 1985	ETHETH	851.15	1782.56	0.954975
DIDA Dera	26 OCT 1996	ETHETH	882.84	1851.86	0.953463
DOMÍNGUEZ Marta	1975-11-03	ESPESP	888.33	1851.69	0.95948
DONG Yanmei	1977-02-16	CHNCHN	869.82	1838.09	0.946439
DONG Zhaoxia	1974-11-13	CHNCHN	887.2	1847.22	0.960579
ERKESSO Teyba	30 OCT 1982	ETHETH	902.28	1873.67	0.963115
ESHETE Shitaye	21 MAY 1990	BRNBRN	903.13	1847.25	0.97781
FEYSA Hawi	1999-02-01	ETHETH	873.66	1863.32	0.937746
FLANAGAN Shalane	1981-07-08	USAUSA	884.8	1822.22	0.971123
FRERICHS Courtney	1993-01-18	USAUSA	890.06	1883.13	0.945299
FUKUSHI Kayoko	25 MAR 1982	JPNJPN	893.22	1851.81	0.964699
GALVÁN Laura	05 OCT 1991	MEXMEX	889.34	1864.08	0.954187
GEBRESELAMA Tsigie	2000-09-30	ETHETH	883.9	1804.45	0.979689
GEBRESLASE Gotytom	1995-01-15	ETHETH	897.33	1874.52	0.957397
GEBRZIHAIR Girmawit	2001-11-21	ETHETH	886.12	1823.69	0.971788
GEMECHU Tsehay	12 DEC 1998	ETHETH	869.6	1819.29	0.955977
GETACHEW Senayet	01 OCT 2005	ETHETH	886.25	1859.39	0.95327
GEZAHEGNE Kalkidan	08 MAY 1991	BRNBRN	892.92	1790.77	0.997247
GIDEY Letesenbet	20 MAR 1998	ETHETH	846.62	1741.03	0.972551
GODFAY Afera	1991-09-25	ETHETH	901.2	1868.23	0.964763
GOUCHER Kara	1978-07-09	USAUSA	895.02	1855.16	0.964898
GRØVDAL Karoline Bjerkeli	1990-06-14	NORNOR	871.07	1850.84	0.94127
GUIDA Maria	1966-01-23	ITAITA	898.84	1887.82	0.952252
HAILU Lemlem	25 MAY 2001	ETHETH	874.53	1799.15	0.972159
HALL Marielle	1992-01-28	USAUSA	902.27	1865.71	0.967214
HAROYE Alemitu	09 MAY 1995	ETHETH	883.28	1850.83	0.954469
HASSAN Sifan	1993-01-01	NEDNED	853.42	1746.82	0.977113
HENES Elly	13 OCT 1998	USAUSA	887.15	1848.26	0.959984
HIRONAKA Ririka	2000-11-24	JPNJPN	892.84	1839.71	0.970631
HUDDLE Molly	1984-08-31	USAUSA	882.64	1813.17	0.973588
INFELD Emily	21 MAR 1990	USAUSA	890.9	1868.57	0.953563
JUDD Jess	1995-01-07	GBRGBR	897.19	1835.93	0.977368
KAMAU Tabithanjeri	2000-07-03	KENKEN	888.26	1877.4	0.946266
KAMULU Pauline	30 DEC 1994	KENKEN	894.19	1820.97	0.982103
KASTOR Deena	1973-02-14	USAUSA	891.62	1850.32	0.963747
KELATI FREZGHI Weini	01 DEC 1996	USAUSA	893.41	1864.16	0.958512
KIBET Sylvia Jebiwot	28 MAR 1984	KENKEN	871.91	1847.2	0.944034
KIDANE Werknesh	1981-01-07	ETHETH	873.04	1807.15	0.966206
KIPCHUMBA Irene Kwambai	25 OCT 1978	KENKEN	889.32	1855.67	0.958489
KIPKEMBOI Margaret Chelimo	1993-02-09	KENKEN	863.67	1810.07	0.954295
KIPKIRUI Caroline Chepkoech	26 MAY 1994	KENKEN	867.55	1817.64	0.954589
KIPLAGAT Florence	1987-02-27	KENKEN	880.14	1811.53	0.971709
KIPLAGAT Lornah	01 MAY 1974	NEDNED	896.43	1812.53	0.989148
KIPYEGO Sally	19 DEC 1985	KENKEN	870.42	1826.37	0.953169
KIROS Aheza	16 OCT 1985	ETHETH	896.33	1866.93	0.960218
KITE Gloria	1998-01-10	KENKEN	889.22	1873.04	0.949494
KLIMINA Viktoriya	01 MAR 1976	RUSRUS	895.55	1873.5	0.956018
KLOSTERHALFEN Konstanze	1997-02-18	GERGER	866.76	1861.71	0.931144
KONOVALOVA Mariya	1974-08-14	RUSRUS	878.09	1831.03	0.959121
KORIKWIANG Pauline Chemning	01 MAR 1988	KENKEN	881.28	1866.29	0.944419
KOSGEI Salina Jebet	1976-11-16	KENKEN	901.79	1887.83	0.955372
KRISTIANSEN Ingrid	21 MAR 1956	NORNOR	877.33	1813.74	0.967426
KRUMINS Susan	1986-07-08	NEDNED	891.25	1865.4	0.955559
LAN Lixin	1979-02-14	CHNCHN	885.33	1839.41	0.962624
LEGHZAOUI Asmae	1976-08-30	MARMAR	888.31	1876.94	0.946551
LIU Shixiang	1971-01-13	CHNCHN	872.33	1855.83	0.940097
LOBUN Hellen Ekalale	18 MAR 1999	KENKEN	901.14	1882.89	0.957188
LOROUPE Tegla	09 MAY 1973	KENKEN	885.95	1832.03	0.967178
MALOT Leah	1972-06-07	KENKEN	879.83	1857.7	0.947225
MARKOVC Amy-Eloise	1995-08-05	GBRGBR	896.6	1877.81	0.954942
MASAI Edith	1967-04-04	KENKEN	873.84	1830.26	0.954881
MASAI Linet Chepkwemoi	05 DEC 1989	KENKEN	871.14	1826.5	0.95389
MCCOLGAN Eilish	1990-11-25	GBRGBR	868.55	1800.86	0.964595
MCCOLGAN Liz	24 MAY 1964	GBRGBR	899.56	1857.07	0.968795
MCKIERNAN Catherina	1969-11-30	IRLIRL	889.4	1868.41	0.952039
MELKAMU Meselech	1985-04-19	ETHETH	871.91	1793.8	0.972137
MEYER Elana	10 OCT 1966	RSARSA	884.05	1852.51	0.954435
MINSEWO Abersh	2001-02-22	ETHETH	887.98	1873.53	0.947922
MOCKENHAUPT Sabrina	06 DEC 1980	GERGER	899.88	1874.21	0.960277
MOMANYI Grace	1981-02-13	KENKEN	890.77	1868.24	0.953593
MONSON Alicia	13 MAY 1998	USAUSA	859.45	1803.82	0.952922
MONTEIRO Inês	18 MAY 1980	PORPOR	901.06	1873.58	0.961859
MOREIRA Sara	17 OCT 1985	PORPOR	894.71	1872.93	0.955412
MULATIE Bosena	2001-11-21	ETHETH	894.22	1817.77	0.983865
NAWOWUNA Alice Aprot	1994-01-02	KENKEN	879.56	1793.51	0.980825
NAWOWUNA Grace Loibach	2003-11-10	KENKEN	882.63	1787.42	0.987602
NIIYA Hitomi	1988-02-26	JPNJPN	895.83	1820.44	0.984191
NIYOMUKUNZI Francine	1999-08-01	BDIBDI	893.02	1887.47	0.946261
NIYONSABA Francine	05 MAY 1993	BDIBDI	865.34	1841.93	0.939601
OBIRI Hellen	13 DEC 1989	KENKEN	858.37	1810.02	0.948465
OLJIRA Belaynesh	1990-06-26	ETHETH	882.57	1826.7	0.9663
ONGORI Philes	1986-07-19	KENKEN	884.2	1878.85	0.941214
O'SULLIVAN Sonia	1969-11-28	IRLIRL	881.02	1847.59	0.953696
PAVEY Joanne	1973-09-20	GBRGBR	879.96	1853.2	0.949665
PROKOPČUKA Jeļena	1976-09-21	LATLAT	887.71	1838.78	0.965542
RADCLIFFE Paula	17 DEC 1973	GBRGBR	869.11	1801.09	0.965093
RHINES Jennifer	1974-07-01	USAUSA	894.29	1877.31	0.952736
RIBEIRO Fernanda	1969-06-23	PORPOR	876.45	1822.88	0.96161
ROGERS Natosha	07 MAY 1991	USAUSA	895.39	1848.69	0.968675
RUDOLPH Amy	1973-09-18	USAUSA	896.04	1878.96	0.953762
SAEED MOHAMMED Alia	18 MAY 1991	UAEUAE	900.45	1870.25	0.962919
SAINA Betsy	1988-06-30	KENKEN	879.49	1807.78	0.973006
SALPETER Lonah Chemtai	12 DEC 1988	ISRISR	899.02	1846.37	0.973824
SCHNEIDER Rachel	1991-07-18	USAUSA	892.04	1869.79	0.954161
SCHWEIZER Karissa	04 MAY 1996	USAUSA	866.34	1818.05	0.953043
SCOTT Dominique	1992-06-24	RSARSA	899.08	1860.1	0.966701
SECCAFIEN Andrea	1990-08-27	CANCAN	897.07	1873.94	0.957416
SHOBUKHOVA Liliya	1977-11-13	RUSRUS	863.75	1829.36	0.944319
SISSON Emily	12 OCT 1991	USAUSA	893.84	1849.57	0.966538
SMITH Kimberley	1981-11-19	NZLNZL	885.93	1835.54	0.965307
SONG Liqing	1980-01-20	CHNCHN	885.71	1871.26	0.946646
SUN Yingjie	1979-01-19	CHNCHN	880.41	1807.2	0.974336
TAYE Ejgayehu	2000-02-10	ETHETH	852.98	1797.45	0.9491
TEFERI Selamawit	24 MAR 1994	ISRISR	893.43	1879.5	0.95071
TEFERI Senbere	03 MAY 1995	ETHETH	855.24	1840.59	0.929311
TIMBILILI Alice Jemeli	1983-02-01	KENKEN	887.06	1883.99	0.941682
TIROP Agnes Jebet	23 OCT 1995	KENKEN	860.68	1825.2	0.943108
TSEGAY Gudaf	1997-06-23	ETHETH	852.29	1769.73	0.963186
TUFA Mestawat	1983-09-14	ETHETH	891.72	1838.33	0.970141
TULU Derartu	21 MAR 1972	ETHETH	884.22	1817.49	0.973012
TWELL Stephanie	1989-08-17	GBRGBR	894.08	1868.13	0.957192
UHL Lisa	1987-08-31	USAUSA	895.74	1872.8	0.956578
UTURA Sule	1990-02-08	ETHETH	884.21	1855.5	0.953069
VAQUERO Julia	1970-09-18	ESPESP	884.95	1874.51	0.944193
WAMBUI Eveline Nganga	1986-04-04	KENKEN	884.49	1874.08	0.943919
WAMI Gete	11 DEC 1974	ETHETH	870.88	1822.48	0.955709
WANG Dongmei	03 DEC 1972	CHNCHN	888.45	1847.72	0.961672
WANG Junxia	1973-01-09	CHNCHN	891.87	1771.78	1.00675
WANGUI Lucy Kabuu	24 MAR 1984	KENKEN	873.49	1839.96	0.949466
WANJIRU Veronica	29 OCT 1989	KENKEN	884.82	1867.56	0.947568
WELLINGS Eloise	1982-11-09	AUSAUS	894.11	1874.94	0.953748
WESSEL Kathrin	1967-08-14	GERGER	898.71	1863.62	0.964478
WIGENE Susanne	1978-02-12	NORNOR	888.53	1832.36	0.96982
WILLIS-JOHNSON Benita	06 MAY 1979	AUSAUS	887.6	1837.68	0.966001
XING Huina	1984-02-25	CHNCHN	883.64	1824.36	0.968712
YALEW Genet	31 DEC 1992	ETHETH	888.43	1837.38	0.967062
YEHUALAW Yalemzerf	1999-08-03	ETHETH	893.77	1820.77	0.981749
YESHANEH Ababel	1991-07-22	ETHETH	881.58	1835.91	0.960374
YIN Lili	1979-11-11	CHNCHN	879.96	1839.98	0.956489
YODER BEGLEY Amy	1978-01-11	USAUSA	896.72	1873.78	0.957124
ZHILYAYEVA Alla	1969-02-05	RUSRUS	899.46	1823.07	0.986753
